# Supplementary material
Source: PubMed Central journal article supplement (PMC1183107)
Supplement: nar_33_14_4455__1.pdf [file nar_33_14_4455__1.pdf]

CLUSTAL W (1.83) multiple sequence alignment

```
XP_133376.1      SNEYRVRRRERNNI AVR - KSRDKAKQRNVETQQKVLELTSNDNRLRKRVEQLSRELDTLRG
CEBA_BOVIN      SNEYRVRRRERNNI AVR - KSRDKAKQRNVETQQKVLELTSNDNRLRKRVEQLSRELDTLRG
NP_036656.1     SNEYRVRRRERNNI AVR - KSRDKAKQRNVETQQKVLELTSNDNRLRKRVEQLSRELDTLRG
CEBA_HUMAN      SNEYRVRRRERNNI AVR - KSRDKAKQRNVETQQKVLELTSNDNRLRKRVEQLSRELDTLRG
NP_034013.1     SDEYKMRRRERNNI AVR - KSRDKAKMRNLETQHKVLELTAENERLQKKVEQLSRELSTLRN
CAA43179.1      SDEYKMRRRERNNI AVR - KSRDKAKMRNLETQHKVLELTAENERLQKKVEQLSRELSTLRN
NP_990584.1     SDEYKLRRRERNNI AVR - KSRDKAKMRNLETQHKVLELTAENERLQKKVEQLSRELSTLRN
NP_005185.2     SDEYKIRRRERNNI AVR - KSRDKAKMRNLETQHKVLELTAENERLQKKVEQLSRELSTLRN
NP_789745.1     SDEYKIRRRERNNI AVR - KSRDKAKMRNLETQHKVLELTAENERLQKKVEQLSREVESTLRN
CEBE_HUMAN      SLEYRLRRERNNI AVR - KSRDKAKRRILETQQKVLEYMAENERLRSRVEQLTQELDTLRN
NP_058791.1     SLEYRLRRERNNI AVR - KSRDKAKRRIMETQQKVLEYMAENERLRSRVDQLTQELDTLRN
NP_031705.2     SPEYRQRRERNNI AVR - KSRDKAKRRNQEMQQKLVELSAENEKLRQVEQLTRDLAQLRQ
CEBD_HUMAN      SPEYRQRRERNNI AVR - KSRDKAKRRNQEMQQKLVELSAENEKLRQVEQLTRDLAQLRQ
NP_037286.1     SPEYRQRRERNNI AVR - KSRDKAKRRNQEMQQKLVELSAENEKLRQVEQLTRDLASLRQ
NP_001797.1     SDEYRQRRERNNMV AVK - KSRLKSKQKAQDTLQRVNQLKEENERLEAKIKLLTKELSVLKD
CEBG_RAT        SDEYRQRRERNNMV AVK - KSRLKSKQKAQDTLQRVNQLKEENERLEAKIKLLTKELSVLKD
CEBG_MOUSE      SDEYRQRRERNNMV AVK - KSRLKSKQKAQDTLQRVNQLKEENERLEAKIKLLTKELSVLKD
A43481          TDEYRRRRERNNI AVR - KSREKAKVRSREVEERVKSLLKEKDALIRQLGEMTNELQLHKQ
CEB_DROVI       TEEYRRRRERNNI AVR - KSREKAKVRSKEVEERVKSLLKEKDALLRQLSEMTNELSLHKQ
AAH18323.1      DEKYWSRRYKNN EAAK - RSRDARRLKENQISVRAAFLEKENALLRQEVVAVRQELSHYRA
BAA05833.1      DEKYWSRRYKNN EAAK - RSRDARRLKENQISVRAAFLEKENALLRQEVVAVRQELSHYRA
AAR99622.1      DEKYWSRRYKNN EAAK - RSRDARRLKENQISVRAAFLEKENALLRQEVVAVRQELSHYRA
NP_059072.1     DEKYWTRRKKN NVAAK - RSRDARRLKENQITIRAAFLEKENTALRTEVAELRKEVKGCKT
NP_062067.1     DEKYWTRRKKN NVAAK - RSRDARRLKENQITIRAAFLEKENTALRTEVAELRKEVKGCKT
NP_003207.1     DEKYWTRRKKN NVAAK - RSRDARRLKENQITIRAAFLEKENTALRTEVAELRKEVKGCKT
A41524          DEKYWTRRKKN NVAAK - RSRDARRLKENQITIRAAFLEKENTALRTEVAD-----
TEF_PHOSU       DDKYWARRRKNN MAAK - RSRDARRLKENQIAIRASFLEKENSALRQEVADLRKELGKCKN
NP_766151.1     DDKYWARRRKNN MAAK - RSRDARRLKENQIAIRASFLEKENSALRQEVADLRKELGKCKN
HLF_RAT         DDKYWARRRKNN MAAK - RSRDARRLKENQIAIRASFLEKENSALRQEVADLRKELGKCKN
NP_002117.1     DSAYFERRRKNN DAAK - RSRDARRQKEEQIASKAHALERENMQLRGKVSLSLEQEAQRLR-
NP_493610.1     DAAYYERRRKNN AAAK - KSRDRRIKEDEIATRAAYLERQNI ELLCQIDALKVQLAAFTS
NP_525049.1     SPKYLEKRMKN NEAAK - KSRASRKHREQKNQ TENELLKRKNAALEEELKQAKCELAQMQI
NP_498426.1     DVRRVQRREKN RIAAQ - KSRQRQTQKADTLHLESEDLEKQNAALRKEIKQLTEELKYFTS
NP_006390.1     DVRRVQRREKN RIAAQ - KSRQRQTQKADTLHLESEDLEKQNAALRKEIKQLTEELKYFTS
NP_058047.1     DERKRRRRERN KIAAA - KCRNKKKEKTECLQKESKLESVNAELKAQIEELKNEKQHLYIY
NP_037044.1     DERKRRRRERN KIAAA - KCRNKKKEKTECLQKESKLESVNAELKAQIEELKNEKQHLYIY
NP_031524.2     DERKRRRRERN KIAAA - KCRNKKKEKTECLQKESKLESVNAELKAQIEELKNEKQHLYIY
NP_001665.1     DERKRRRRERN KIAAA - KCRNKKKEKTECLQKESKLESVNAELKAQIEELKNEKQHLYIY
NP_037085.1     EERRRVRRERN KLA AA - KCRNRRKELTDFLQAETDKLEDEKSGLQREIEELQKQKERLEL
NP_034365.1     EERRRVRRERN KLA AA - KCRNRRKELTDFLQAETDKLEDEKSGLQREIEELQKQKERLEL
NP_005429.1     EERRRVRRERN KLA AA - KCRNRRKELTDFLQAETDKLEDEKSGLQREIEELQKQKERLEL
NP_955598.1     EVKRRIRRRERN KMAAA - KCRNRRRELTDTLQAETDQLEDEKSALQTEIANLLKEKEKLEF
FOS_SHEEP      -----ERNKMAAA - KCRNRRRELTDTLQAETDQLEDEKSALQTEIANLLKEKEKLEF
NP_034364.1     EEKRRIRRRERN KMAAA - KCRNRRRELTDTLQAETDQLEDEKSALQTEIANLLKEKEKLEF
AAG47951.1     EEKRRIRRRERN KMAAA - KCRNRRRELTDTLQAETDQLEDEKSALQTEIANLLKEKEKLEF
FOS_CRIGR      EEKRRIRRRERN KMAAA - KCRNRRRELTDTLQAETDQLEDEKSALQTEIANLLKEKEKLEF
FOS_FELCA      EEKRRIRRRERN KMAAA - KCRNRRRELTDTLQAETDQLEDEKSALQTEIANLLKEKEKLEF
FOS_MESAU      EEKRRIRRRERN KMAAA - KCRNRRRELTDTLQAETDQLEDEKSALQTEIANLLKEKEKLEF
CAB40144.1     EEKRRIRRRERN KMAAA - KCRNRRRELTDTLQAETDQLEDEKSALQTEIANLLKEKEKLEF
NP_005243.1     EEKRRIRRRERN KMAAA - KCRNRRRELTDTLQAETDQLEDEKSALQTEIANLLKEKEKLEF
FOS_MSVFB      EEKRRIRRRERN KMAAA - KCRNRRRELTDTLQAETDQLEDEKKSALQTEIANLLKEKEKLEF
FOS_AVINK      EEKRRIRRRERN KMAAA - KCRNRRRELTDTLQAETDQLEEEKSALQAEIANLLKEKEKLEF
NP_990839.1     EEKRRIRRRERN KMAAA - KCRNRRRELTDTLQAETDQLEEEKSALQAEIANLLKEKEKLEF
FOS_FUGRU      EEKRRIRRRERN KQAAA - KCRNRRRELTDTLQAETDQLEDEKSSLQNDIANLLKEKERLEF
```

FOS\_TETFL EEKRRIRRRERNKQAAA - KCRNRRRELTDLSQAETDQLEAEKSSLQNDIANLLKEKERLEF  
FOS\_CYPCA EEKRRVRRERNKMAAA - KCRNRRRELTDTLQAETDELEDEKSALQNDIANLLKEKERLEF  
NP\_032062.1 EEKRRVRRERNKLA AAA - KCRNRRRELTDRLQAETDQLEEEKAELESEIAELQKEKERLEF  
NP\_006723.1 EEKRRVRRERNKLA AAA - KCRNRRRELTDRLQAETDQLEEEKAELESEIAELQKEKERLEF  
NP\_037086.1 EEKRRIRRRERNKLA AAA - KCRNRRRELTEKLQTETEELKEEESGLQKEIAELQKEKEKLEF  
NP\_005244.1 EEKRRIRRRERNKLA AAA - KCRNRRRELTEKLQAETEELEEEESGLQKEIAELQKEKEKLEF  
FRA2\_MOUSE EEKRRIRRRERNKLA AAA - KCRNRRRELTEKLQAETEELEEEESGLQKEIAELQKEKEKLE -  
FRA2\_CHICK EEKRRIRRRERNKLA AAA - KCRNRRRELTEKLQAETEVLEEEESVQLQKEIAELQKEKEKLEF  
A35847 EQKRAVRRERNKQAAA - RCRKRRVDQTNELTEEEVEQLEKRGESMRKEIEVLTNSKNQLEY  
NP\_593039.1 GTKQSMKARNRQAAQ - KCRIKKKKYLQTLQDQVNYTSENKELLQSANDLREEI I KLRT  
BAA12194.1 EEKRRKSFLEARNRQAAL - KCRQRKKQWLSNLQAKVEFYGNENEILSAQVSALREEIIVSLKT  
NP\_012228.1 - - KRARLLERNRIAAS - KCRQRKKMSQLQLQREFDQI SKENTMMKKKIENYEKLVQKMKK  
NP\_010964.1 - - KRARLLERNRIAAS - KCRQRKKMSQLQLQREFDQI SKENTMMKKKIENYEKLVQKMKK  
NP\_014232.1 ERKRKEFLERNRVAAS - KFRKRKKEYIKKIENDLQFYSEY - - - - - DDLTQVIGKL - -  
NP\_594500.1 DEKRRRILERNRIAAS - KFRQKKKEWIKLEQTANAAFEQSKRLQLLLSLLQQAFAFRLKS  
NP\_595707.1 DMKRRRFLERNRIAAS - KCRQKKKLWTQNLKTAHIACEQSKALRILVSQLREEVICLKN  
ATF2\_HUMAN DEKRRKFLERNRAAAS - RCRQKRKVVVQSLKKAEDLSSLNGQLQSEVTLRNEVAQLKQ  
AAH42210.1 DEKRRKFLERNRAAAS - RCRQKRKVVVQSLKKAEDLSSLNGQLQSEVTLRNEVAQLKQ  
NP\_112280.1 DEKRRKFLERNRAAAS - RCRQKRKVVVQSLKKAEDLSSLNGQLQSEVTLRNEVAQLKQ  
NP\_990235.1 DEKRRKFLERNRAAAS - RCRQKRKVVVQSLKKAEDLSSLNGQLQNEVTLRNEVAQLKQ  
ATF7\_HUMAN DERRQRFLERNRAAAS - RCRQKRKLWVSSLEKKAEEELTSQNIQLSNEVTLRNEVAQLKQ  
CRB5\_MOUSE DERRRKFLERNRAAAT - RCRQKRKVVVMSLEKKAEEELTQTNMQLQNEVSMLKNEVAQLKQ  
NP\_878901.1 DERRRKFLERNRAAAT - RCRQKRKVVVMSLEKKAEEELTQTNMQLQNEVSMLKNEVAQLKQ  
NP\_112279.1 ARKREVRLMKNREAAR - ECRRKKKEYVKCLENRVAVLENQNKTLEELKALKD - - - - -  
CREB\_BOVIN ARKREVRLMKNREAAR - ECRRKKKEYVKCLENRVAVLENQNKTLEELKALKD - - - - -  
NP\_034082.1 ARKREVRLMKNREAAR - ECRRKKKEYVKCLENRVAVLENQNKTLEELKALKD - - - - -  
AAQ24858.1 ARKREVRLMENREAAR - ECRRKKKEYVKCLENRVAVLENQNKTLEELKALKD - - - - -  
BAA83552.1 TRKRELRLMKNREAAR - ECRRKKKEYVKCLENRVAVLESQNKTLIEELKALKD - - - - -  
CREM\_CANFA TRKRELRLMKNREAAR - ECRRKKKEYVKCLENRVAVLENQNKTLEELKALKD - - - - -  
CREB\_CHLVR TRKRELRLYKNREAAR - ECRRKKKEYVKCLENRVAVLENQNKALIEELKSLKD - - - - -  
NP\_996507.1 TRKREIRLQKNREAAR - ECRRKKKEYIKCLENRVAVLENQNKALIEELKSLKELYCQTKN  
NP\_005162.1 QLKREIRLQKNREAAR - ECRRKKKEYVKCLENRVAVLENQNKTLEELKTLKD - - - - -  
BAB26930.1 QLRREIRLQKNREAAR - ECRRKKKEYVKCLENRVAVLENQNKTLEELKTLKD - - - - -  
CREM\_MOUSE TRKRELRLMKNREAAR - ECRRRKKKEYVKCLESRVAVLEVQNKKLEEELETLD - - - - -  
CREM\_HUMAN TRKRELRLMKNREAAR - ECRRRKKKEYVKCLESRVAVLEVQNKKLEEELETLD - - - - -  
NP\_776711.1 VLKRVRRKIRNKSAQ - ESRRKKKVYVGGLESRLKYTAQNLELQNKVQLLEEQLNLSLLD  
AAC04325.1 I LKRVRRKIRNKSAQ - ESRRKKKVYVGGLESRLKYTAQNMELQNKVQLLEEQLNLSLLD  
BAB25173.1 VLKRVRRKIRNKRAAQ - ESRKKKKVYVGGLESRLKYTAQNRELQNKVQRLLEEQLNLSLLD  
A44494 SLKKIRRKIKNKISAQ - ESRRKKKEYMDQLERRVEILVTENHDYKRRLEGLEETNANLLS  
CAA66664.1 LLKRHERMIKNRESAC - QSRRKKKEYLQGLEEARLQAVLADNQQLRRENAALRRRLEALLA  
NP\_059102.1 LLKRQQRMIKNRESAC - QSRRKKKEYLQGLEEARLQAVLADNQQLRRENAALRRRLEALLA  
NP\_031374.1 VLRRQQRMIKNRESAC - QSRRKKKEYMLGLEARLKAALSENEQLKKENGTLKRQLDEVVS  
NP\_196313.1 DQKTLRRLAQNREAAR - KSRLRKKAYVQOLENSRLKLTQLEQELQR - - - - -  
NP\_566415.3 DQKTLRRLAQNREAAR - KSRLRKKAYVQOLENSRLKLTQLEQELQR - - - - -  
BAA06486.1 DQKTMRRRLAQNREAAR - KSRLRKKAYVQOLENSRLKLTQLEQELQR - - - - -  
TG21\_TOBAC DQKTLRRLAQNREAAR - KSRLRKKAYVQOLENSRLKLSQLEQDLQR - - - - -  
AAF06696.1 DQKTLRRLAQNREAAR - KSRLRKKAYVQOLESSRMKLTQLEQELQR - - - - -  
HBB2\_WHEAT DHKSLRRLAQNREAAR - KSRLRKKAYIQNLESRLKLTQLEQELQR - - - - -  
AAM64610.1 PDKIQRRRLAQNREAAR - KSRLRKKAYVQOLETSRLKLIQLEQEL - - - - -  
S48121 PDKIQRRRLAQNREAAR - KSRLRKKAYVQOLETSRLKLIHLEQEL - - - - -  
AAM64781.1 NDKMKRRLAQNREAAR - KSRLRKKAHVQOLEESRLKLSQLEQEL - - - - -  
AAF17682.1 HDKMKRRLAQNREAAR - KSRLRKKAYVQOLEESRLKLSQLEQELEK - - - - -  
TGAB\_TOBAC DEKRRARLVRNRESAQ - LSRQRKKHYVEELEDKVRIMHSTIQDLNAKVAYIIAENATLKT  
CAB57979.1 ENKRLKRLLRNRVSAQ - QARERKKAYLIDLEARVKELETKNAEERLSTLQENQMLRH  
NP\_568246.1 ENKRLKRLLRNRVSAQ - QARERKKAYLSELENRVKDLENKNSLEERLSTLQENQMLRH  
NP\_850604.1 EYRSLKRLLRNRVSAQ - QARERKKVYVSDLESRANELQNNNDQLEEKI STL TNENTMLRK  
NP\_850449.1 ELKRERRKQSNRESAR - RSRLRKKQAETEELARKVEALTAENMALRSELNQLNEKSDKLRG

AAM62869.1 EVKREKRKQSNRESAR - RSRLRKQAEETEQLSVKVDALVAENMSLRSKLGQLNNESEKLRRL  
CPR1\_PETCR DLKRERRKQSNRESAR - RSRLRKQAEAEELA I KVDLSLTAENMALKAEINRLTLTAEKLTN  
TAF1\_TOBAC ELKREKRKQSNRESAR - RSRLRKQAEAEELA I RVQSLTAENMTLKSEINKLMENSEKLLK  
EMP1\_WHEAT ELKRERRKQSNRESAR - RSRLRKQAECEELA QKVSELTAANGTLRSEL DQLKKDCKTMET  
CPR3\_PETCR ELKRQRRKQSNRESAR - RSRLRKQAKSDELQERLDNLSKENRILRKNLQRI SEACAEVTS  
NP\_849510.1 ELKRQKRKQSNRESAR - RSRLRKQAECEQLQQRVESLSNENQSLRDELQRLSSECDKLS  
HBPA\_WHEAT ELKKQKRKLSNRESAR - RSRLRKQAECEELGQRAEALKSENSSLRIELDRIKKEYEELLS  
OP2\_MAIZE TEERVRRKESNRESAR - RSRYRKAHLKELEDQVAQLKAENSCLLRRIAALNQKYN - - - -  
CPR2\_PETCR DAKRVRMLSNRESAR - RSRRRKQAHMTELETQVSQLRVENSLLKRLTDI SQRYN - - - -  
OCS1\_MAIZE THRREKRRLSNRESAR - RSRLRKQOHLDELQVEVARLQADNARVAARARDIASQYTRVEQ  
AAK19601.1 VERRQKRMIKNRESAA - RSRARKQAYTHELEI KVSRLLEEENERLRKQ - - - - - - - - - -  
NP\_172097.1 DPKRAKRIWANRQSA - RSKERKMRYIAELERKVQTLQTEATSLSAQLTLLQORDTNGLV  
BAB82982.1 EEKALRRKLN RVAAQ - TARDRKKARMSELEQQVVDLEEENQKLLLENQLLREKTHGLVV  
NP\_038870.2 EEKALRRKLN RVAAQ - TARDRKKARMSELEQQVVDLEEENHKLQLENQLLREKTHGLVV  
XP\_214067.1 EEKALRRKLN RVAAQ - TARDRKKARMSELEQQVVDLEEENQKLLQLENQLLREKTHGLVI  
MAF\_MOUSE RLKQKRRTLKNRGY - SCRFRKRVQQRHVLESEKNQLLQQVDHLKQEI SRLVREERDAYKE  
NP\_062191.1 RLKQKRRTLKNRGY - SCRFRKRVQQRHVLESEKNQLLQQVDHLKQEI SRLVREERDAYKE  
NP\_005351.2 RLKQKRRTLKNRGY - SCRFRKRVQQRHVLESEKNQLLQQVDHLKQEI SRLVREERDAYKE  
TMAF\_AVIS4 RLKQKRRTLKNRGY - SCRFRKRVQQRHVLESEKNQLLQQVEHLKQEI SRLVREERDAYKE  
NP\_034788.1 RLKQKRRTLKNRGY - SCRYKRVQKHHLENEKTQLIQQVEQLKQEVSR LARERDAYKV  
NP\_062189.1 RLKQKRRTLKNRGY - SCRYKRVQKHHLENEKTQLIQQVEQLKQEVSR LARERDAYKV  
NP\_005452.2 RLKQKRRTLKNRGY - SCRYKRVQKHHLENEKTQLIQQVEQLKQEVSR LARERDAYKV  
NP\_032762.1 RLKQRRRTLKNRGY - ACRSKRLQRRGLEAERARLAAQLDALRAEVARL LARERDLYKA  
NP\_006168.1 RLKQRRRTLKNRGY - ACRSKRLQRRGLEAERARLAAQLDALRAEVARL LARERDLYKA  
NP\_034885.1 RLKQRRRTLKNRGY - SCRVRKVCQKEELQKQKSELEREVDKLARENAAMRLELDALRG  
NP\_036455.1 RLKQRRRTLKNRGY - SCRVRKVCQKEELQKQKSELEREVDKLARENAAMRLELDALRG  
NP\_990088.1 RLKQRRRTLKNRGY - SCRVRKVCQKEELQKQKMELEWEVDKLARENAAMRLELDTLRG  
NP\_034886.1 QLKQRRRTLKNRGY - SCRVRKVTQKEELEKQKAELOQVEVEKLA SENASMKLELDALRS  
NP\_002350.1 QLKQRRRTLKNRGY - SCRVRKVTQKEELEKQKAELOQVEVEKLA SENASMKLELDALRS  
MAFG\_CHICK RLKQRRRTLKNRGY - SCRVRKVTQKEELEKQKAELOQVEVEKLA SENASMKMELDALRS  
NP\_002351.1 RLKQRRRTLKNRGY - SCRIRKVTQKEELERQVRELQQVEVEKLARENS SMRLELDALRS  
NP\_034887.1 RLKQRRRTLKNRGY - SCRIRKVTQKEELERQVRELQQVEVEKLARENS SMRLELDALRS  
NP\_990087.1 RLKQRRRTLKNRGY - SCRIRKVTQKEELERQVRELQQVEVEKLARENS SMKLELDALRS  
NP\_035032.1 LIRDIRRRGKNKVAAQ - NCRKRKLENIVELEQDLGHLKDEREKLLREKGENDRNLHLLKR  
NP\_113977.1 LIRDIRRRGKNKVAAQ - NCRKRKLENIVELEQDLGHLKDEREKLLREKGENDRNLHLLKR  
NP\_006155.2 LIRDIRRRGKNKVAAQ - NCRKRKLENIVELEQDLGHLKDEKEKLLKEKGENDKSLHLLKK  
AAA35612.1 LVRDIRRRGKNKVAAQ - NCRKRKLETIVQLERELERTNERERLLRARGEADRTLEVMRQ  
NP\_003195.1 LIRDIRRRGKNKMAAQ - NCRKRKLDITILNLERDVEDLQORDKARLLREKVEFLRSLRQMKQ  
NP\_032712.2 LIRDIRRRGKNKMAAQ - NCRKRKLDITILNLERDVEDLQORDKARLLREKVEFLRSLRQMKQ  
NP\_035033.1 LIRDIRRRGKNKVAAQ - NCRKRKLDITILNLEDDICNLQAKKEALKNEQTQCSKAIDIMRQ  
NP\_004280.4 LIRDIRRRGKNKVAAQ - NCRKRKLDITILNLEDDVCNLQAKKETLKREQAQCNKAINIMKQ  
NP\_732833.1 LIRDIRRRGKNKVAAQ - NCRKRKLDITILEDEVNAVVKRKTQLNQDRDHLESERKRISN  
BAA95505.1 - - - - - RRRSKNRIAAQ - RCRKRKLDICIQNLESEIEKLQSEKESLLKERDHILSTLGETKQ  
NP\_031546.1 - - - - - RRRSKNRIAAQ - RCRKRKLDICIQNLESEIEKLQSEKESLLKERDHILSTLGETKQ  
NP\_031547.1 - - - - - RRRSKNRIAAQ - RCRKRKLDICIQNLECEIRKLVCEKEKLLSERNHK - - - - -  
AAK48898.1 - - - - - RRRSKNRIAAQ - RCRKRKLDICIQNLECEIRKLVCEKEKLLSERNQLK - - - - -  
CAA31252.1 RIKAERKMRNRNIAAS - KCRKRKLERIARLEEKVKT LKAQNSELASTANMLREQVAQLKQ  
AP1\_COTJA RIKAERKMRNRNIAAS - KCRKRKLERIARLEEKVKT LKAQNSELASTANMLREQVAQLKQ  
1404381A RIKAERKMRNRNIAAS - KCRKRKLERIARLEEKVKT LKAQNSELASTANMLREQVAQLKQ  
AP1\_CHICK RIKAERKMRNRNIAAS - KCRKRKLERIARLEEKVKT LKAQNSELASTANMLREQVAQLKQ  
AP1\_PIG RIKAERKMRNRNIAAS - KCRKRKLERIARLEEKVKT LKAQNSELASTANMLREQVAQLKQ  
NP\_068607.1 RIKAERKMRNRNIAAS - KCRKRKLERIARLEEKVKT LKAQNSELASTANMLREQVAQLKQ  
AP1\_SERCA RIKAERKMRNRNIAAS - KCRKRKLERIARLEEKVKT LKAQNSELASTANMLREQVAQLKQ  
TJUN\_AVIS1 RIKAERKMRNRNIAAS - KSRKRKLERIARLEEKVKT LKAQNSELASTANMLREQVAQLKQ  
NP\_034722.1 RIKAERKRLRNRIAAS - KCRKRKLERIARLEEKVKT LKSQNT ELASTASLLREQVAQLKQ  
NP\_005345.2 RIKAERKRLRNRIAAS - KCRKRKLERIARLEEKVKT LKSQNT ELASTASLLREQVAQLKQ  
NP\_620230.1 RIKAERKRLRNRIAAS - KCRKRKLERIARLEEKVKT LKSQNT ELASTASLLREQVAQLKQ

JUND\_CHICK RIKAERKRLRNRIAAS - KCRKRKLERISRLEEKVKSLKSQNTTELASTASLLREQVAQLKQ  
 AAH09465.1 RIKVERKRLRNRLAAT - KCRKRKLERIARLEDKVKTLKAENAGLSSTAGLLREQVAQLKQ  
 NP\_068608.2 RIKVERKRLRNRLAAT - KCRKRKLERIARLEDKVKTLKAENAGLSSTAGLLREQVAQLKQ  
 AAA74916.1 RIKVERKRLRNRLAAT - KCRKRKLERIARLEDKVKTLKAENAGLSAAGLLREQVAQLKQ  
 JUNB\_CYPCA RIKAERKRLRNRLAAT - KCRKRKLERISRLEEKVKVLKNDNAGLSNTASVLRDQVAQLKQ  
 NP\_476586.1 KIKLERKQRNRVAAS - KCRKRKLERISKLEDRVKVLKGENVDLASIVKNLKDHVAVQLKQ  
 A30208 -----KRARNTLAAR - KSRERKAQRLEEELEAKIEELIAERDR-----  
 CPC1\_CRYPA -----KRAKNTLAAR - KSRARKAERMDELERQVRELEAEKEKLAA-----ELA-----  
 CAE52206.1 -----KRARNTAAR - RSRARKLQRMKQLEDKVEELLSKNYHLEN-----EVARLKK  
 NP\_013707.1 PETKQKRRTAQNRAAQR - AFRERKERKMKKELEKKVQSLESIQQNEVEATFLRDQLITLVN  
 AP1\_KLULA TEAKDKRRTAQNRAAQR - AFRERRERKMKKELEDKVSQLESLNKQSELETKFLRNQVNTNLLS  
 AAB29937.1 SEAKSRRTAQNRAAQR - AFRDRKEAKMKSLQERVELLEQKDAQNKTTTTDFLLCSLKSLLS  
 NP\_593662.1 QEPSSKRKAQNRAAQR - AFRKRKEDHLKALETQVVTLKELHSSTTLENDQLRQKVRQLEE  
 NP\_011854.1 DDSKAKKKAQNRAAQK - AFRERKEARMKELQDKLLESERNRQSLLEKEIEELRKANTEINA  
 NP\_012283.1 DEELQKKRQNRDAQR - AYRERKNNKLQVLEETIESLSKVVKNYETKLNRLQNELQAKES  
 NP\_594523.1 TAAEEDKRRRNTAASA - RFRIKKKLEQQLERTAKELTEKVAILETRVRELEMENNWLKG  
 CYS3\_NEUCR ----EDKRRRNTAASA - RFRIKKKQREQALEKSAKEMSEKVTQLEGRIQALETENKWLKG  
 NP\_012282.1 DKIKQERRRKNTEASQ - RFRIKKKQKNFENMNKLQNLNTQINKLRDRIEQLNKENEFWKA  
 AAH05174.1 GDRKQKKRDQNKSAAL - RYRQRKRAEAGEALEGECQGLEARNRELKERAESVEREIQYVKD  
 NP\_109618.1 GDRKQKKRDQNKSAAL - RYRQRKRAEAGEALEGECQGLEARNRELREAESVEREIQYVKD  
 ATF4\_HUMAN LDKKLLKMEQNKTAAT - RYRQKKRAEQEALTGECKELEKKNEALKERADSLAKEIQYLKD  
 ATF4\_MOUSE LDKKLLKMEQNKTAAT - RYRQKKRAEQEALTGECKELEKKNEALKEKADSLAKEIQYLKD  
 GA15\_MOUSE QGRTRKRKQSGQCPAR - PGKQRMKEKEQENERKVAQLAEENERLKQEIERLTREVETTRR  
 GA15\_CRILO ----RKRKQSGQCPARGTGKQRMKEKEQENERKVAQLAEENERLKQEIERLTREVEATR -  
 AAB27103.1 QGRTRKRKQSGHSPAR - AGKQRMKEKEQENERKVAQLAEENERLKQEIERLTREVEATR

XP\_133376.1 IFRQL  
 CEBA\_BOVIN IFRQL  
 NP\_036656.1 IFRQL  
 CEBA\_HUMAN IFRQL  
 NP\_034013.1 LFKQL  
 CAA43179.1 LFKQL  
 NP\_990584.1 LFKQL  
 NP\_005185.2 LFKQL  
 NP\_789745.1 LFKTL  
 CEBE\_HUMAN LFRQI  
 NP\_058791.1 LFRQI  
 NP\_031705.2 FFKKL  
 CEBD\_HUMAN FFKQL  
 NP\_037286.1 FFKEL  
 NP\_001797.1 LFLEH  
 CEBG\_RAT LFLEH  
 CEBG\_MOUSE LFLEH  
 A43481 IYMQQL  
 CEB\_DROVI IYMQQL  
 AAH18323.1 VLSRY  
 BAA05833.1 VLSRY  
 AAR99622.1 VLSRY  
 NP\_059072.1 IVSKY  
 NP\_062067.1 IVSKY  
 NP\_003207.1 IVSKY  
 A41524 IVSKY  
 TEF\_PHOSU -----  
 NP\_766151.1 ILAKY  
 HLF\_RAT ILAKY  
 NP\_002117.1 ILAKY

|             |        |
|-------------|--------|
| NP_493610.1 | -----  |
| NP_525049.1 | -----  |
| NP_498426.1 | TIRDM  |
| NP_006390.1 | VLNSH  |
| NP_058047.1 | VLSSH  |
| NP_037044.1 | MLNLH  |
| NP_031524.2 | MLNLH  |
| NP_001665.1 | MLNLH  |
| NP_037085.1 | VLEAH  |
| NP_034365.1 | VLEAH  |
| NP_005429.1 | VLEAH  |
| NP_955598.1 | ILAAH  |
| FOS_SHEEP   | ILAAH  |
| NP_034364.1 | ILAAH  |
| AAG47951.1  | ILAAH  |
| FOS_CRIGR   | ILAAH  |
| FOS_FELCA   | ILAAH  |
| FOS_MESAU   | ILAAH  |
| CAB40144.1  | ILAAH  |
| NP_005243.1 | ILAAH  |
| FOS_MSVFB   | ILAAH  |
| FOS_AVINK   | ILAAH  |
| NP_990839.1 | ILAAH  |
| FOS_FUGRU   | ILAAH  |
| FOS_TETFL   | ILAAH  |
| FOS_CYPCA   | ILAAH  |
| NP_032062.1 | VLVAH  |
| NP_006723.1 | VLVAH  |
| NP_037086.1 | MLVAH  |
| NP_005244.1 | MLVAH  |
| FRA2_MOUSE  | -----  |
| FRA2_CHICK  | MLVAH  |
| A35847      | LLATH  |
| NP_593039.1 | LVFAH  |
| BAA12194.1  | LLIAH  |
| NP_012228.1 | -----  |
| NP_010964.1 | ISRLH  |
| NP_014232.1 | -----  |
| NP_594500.1 | QLLAH  |
| NP_595707.1 | QLLAH  |
| ATF2_HUMAN  | LLLAH  |
| AAH42210.1  | LLLAH  |
| NP_112280.1 | LLLAH  |
| NP_990235.1 | LLLAH  |
| ATF7_HUMAN  | LLLAH  |
| CRB5_MOUSE  | LLLTH  |
| NP_878901.1 | LLLTH  |
| NP_112279.1 | -----  |
| CREB_BOVIN  | -----  |
| NP_034082.1 | -----  |
| AAQ24858.1  | -----  |
| BAA83552.1  | -----  |
| CREM_CANFA  | -----  |
| CREB_CHLVR  | -----  |
| NP_996507.1 | D----- |
| NP_005162.1 | -----  |
| BAB26930.1  | -----  |

|             |        |
|-------------|--------|
| CREM_MOUSE  | -----  |
| CREM_HUMAN  | -----  |
| NP_776711.1 | QLRRL  |
| AAC04325.1  | QLRKL  |
| BAB25173.1  | QLRKL  |
| A44494      | QLHKL  |
| CAA66664.1  | ENSEL  |
| NP_059102.1 | ENSGL  |
| NP_031374.1 | ENQRL  |
| NP_196313.1 | -----  |
| NP_566415.3 | -----  |
| BAA06486.1  | -----  |
| TG21_TOBAC  | -----  |
| AAF06696.1  | -----  |
| HBB2_WHEAT  | -----  |
| AAM64610.1  | -----  |
| S48121      | -----  |
| AAM64781.1  | -----  |
| AAF17682.1  | -----  |
| TGAB_TOBAC  | Q----- |
| CAB57979.1  | ILKNT  |
| NP_568246.1 | ILKNT  |
| NP_850604.1 | MLINT  |
| NP_850449.1 | ANATL  |
| AAM62869.1  | ENEAI  |
| CPR1_PETCR  | DNSRL  |
| TAF1_TOBAC  | ENAAL  |
| EMP1_WHEAT  | ENKKL  |
| CPR3_PETCR  | ENHSI  |
| NP_849510.1 | ENNSI  |
| HBPA_WHEAT  | KNTSL  |
| OP2_MAIZE   | -----  |
| CPR2_PETCR  | -----  |
| OCS1_MAIZE  | ENTVL  |
| AAK19601.1  | -----  |
| NP_172097.1 | ENNEL  |
| BAB82982.1  | ENQEL  |
| NP_038870.2 | ENQEL  |
| XP_214067.1 | ENQEL  |
| MAF_MOUSE   | KYEKL  |
| NP_062191.1 | KYEKL  |
| NP_005351.2 | KYEKL  |
| TMAF_AVIS4  | KYEKL  |
| NP_034788.1 | KCEKL  |
| NP_062189.1 | KCEKL  |
| NP_005452.2 | KCEKL  |
| NP_032762.1 | RCDRL  |
| NP_006168.1 | RCDRL  |
| NP_034885.1 | KCEAL  |
| NP_036455.1 | KCEAL  |
| NP_990088.1 | KYEAL  |
| NP_034886.1 | KYEAL  |
| NP_002350.1 | KYEAL  |
| MAFG_CHICK  | KYEAL  |
| NP_002351.1 | KYEAL  |
| NP_034887.1 | KYEAL  |
| NP_990087.1 | KYEAL  |

|             |       |
|-------------|-------|
| NP_035032.1 | RLSTL |
| NP_113977.1 | KLSTL |
| NP_006155.2 | QLSTL |
| AAA35612.1  | QLTEL |
| NP_003195.1 | KVQSL |
| NP_032712.2 | KVQSL |
| NP_035033.1 | KLHGL |
| NP_004280.4 | KLHDL |
| NP_732833.1 | KFAML |
| BAA95505.1  | NLTGL |
| NP_031546.1 | NLTGL |
| NP_031547.1 | ----- |
| AAK48898.1  | ----- |
| CAA31252.1  | KVMNH |
| AP1_COTJA   | KVMNH |
| 1404381A    | KVMNH |
| AP1_CHICK   | KVMNH |
| AP1_PIG     | KVMNH |
| NP_068607.1 | KVMNH |
| AP1_SERCA   | KVMNH |
| TJUN_AVIS1  | KVMNH |
| NP_034722.1 | KVLSH |
| NP_005345.2 | KVLSH |
| NP_620230.1 | KVLSH |
| JUND_CHICK  | KVLSH |
| AAH09465.1  | KVMTH |
| NP_068608.2 | KVMTH |
| AAA74916.1  | KVMTH |
| JUNB_CYPCA  | KVLRH |
| NP_476586.1 | QVMEH |
| A30208      | ----- |
| CPC1_CRYPA  | ----- |
| CAE52206.1  | ----- |
| NP_013707.1 | ELKKY |
| AP1_KLULA   | ELKRY |
| AAB29937.1  | EITKY |
| NP_593662.1 | ELRIL |
| NP_011854.1 | ENRLL |
| NP_012283.1 | ENHAL |
| NP_594523.1 | LIRPT |
| CYS3_NEUCR  | LVTEK |
| NP_012282.1 | KLNDI |
| AAH05174.1  | LLIEV |
| NP_109618.1 | LLIEV |
| ATF4_HUMAN  | LIEEV |
| ATF4_MOUSE  | LIEEV |
| GA15_MOUSE  | ALIDR |
| GA15_CRILO  | ----- |
| AAB27103.1  | ALIDR |
