# Supplementary material
Source: PubMed Central journal article supplement (PMC1183107)
Supplement: nar_33_14_4455__2.pdf [file nar_33_14_4455__2.pdf]

CLUSTAL W (1.83) multiple sequence alignment

```
AAP36398.1      - - - - -DERKKRRRERENKIAAA-KCRNKKKKEK- - - -TECLQKESEKLESVNAELKAQIEEL
NP_001665.1     - - - - -DERKKRRRERENKIAAA-KCRNKKKKEK- - - -TECLQKESEKLESVNAELKAQIEEL
1604249C        - - - - -DERKKRRRERENKIAAA-KCRNKKKKEK- - - -TECLQKESEKLESVNAELKAQCEEL
C34223          - - - - -DERKKRRRERENKIAAA-KCRNKKKKEK- - - -TECLQKESEKLESVNAELKAQLEEL
AAP92420.1      - - - - -DERKKRRRERENKIAAA-KCRNKKKKEK- - - -TECLQKESEKLESVNAELKAQIEEL
NP_031524.2     - - - - -DERKKRRRERENKIAAA-KCRNKKKKEK- - - -TECLQKESEKLESVNAELKAQIEEL
BAA09095.1      - - - - -DERKKRRRERENKIAAA-KCRNKKKKEK- - - -TECLQKESEKLESVNAELKAQIEEL
NP_037044.1     - - - - -DERKKRRRERENKIAAA-KCRNKKKKEK- - - -TECLQKESEKLESVNAELKAQIEEL
BAB84092.1      - - - - -DERKKRRRERENKIAAA-KCRNKKKKEK- - - -TECLQK-----
AAP93895.1      - - - - -DERKKRRRERENKIAAA-KCRNKKKKEK- - - -TECLQK-----
AAP93896.1      - - - - -DERKKRRRERENKIAAA-KCRNKKKKEK- - - -TECLQK-----
NP_004015.2     - - - - -DERKKRRRERENKIAAA-KCRNKKKKEK- - - -TECLQLQY-----
NP_957258.1     - - - - -NDRRKRRRERENKIAAA-KCRNKKKKEK- - - -TDNLQKESEKLESINAELKAQIEEL
AAF21148.1      - - - - -EERRKRRREKNKVAAA-RCRNKKKER- - - -TEFLQRESERLELMNAELKTQIEEL
NP_569736.1     - - - - -EERRKRRREKNKVAAA-RCRNKKKER- - - -TEFLQRESERLELMNAELKTQIEEL
BAB20088.1      - - - - -EERRKRRREKNKVAAA-RCRNKKKER- - - -TEFLQRESERLELMNAELKTQIEEL
NP_446346.1     - - - - -EERRKRRREKNKVAAA-RCRNKKKER- - - -TEFLQRESERLELMNAELKTQIEEL
NP_620473.1     - - - - -EDRRRRRERENKIAAT-KCRMKKRER- - - -TQNLIKESEVLDTQNVLKNQVRQL
XP_321586.1     - - - - -EDRRRRRERENKIAAT-KCRMKKRER- - - -TVNLINESETLDAQNRELKSQVSKL
1FOSE           - - - - -KRRIRRRERENKMAAA-KSRNRRREL- - - -TDTLQAETDQLEDEKSALQTEIANL
1FOSG           - - - - -RRIRRRERENKMAAA-KSRNRRREL- - - -TDTLQAETDQLEDEKSALQTEIANL
AAG47951.1      - - - - -EEKRIRRRERENKMAAA-KCRNRRREL- - - -TDTLQAETDQLEDEKSALQTEIANL
FOS_CRIGR       - - - - -EEKRIRRRERENKMAAA-KCWNRRREL- - - -TDTLQAETDQLEDEKSALQTEIANL
XP_234422.2     - - - - -EEKRIRRRERENKMAAA-KCRNRRREL- - - -TDTLQAETDQLEDEKSALQTEIANL
AAA42348.1      - - - - -EEKRIRRRERENKMAAA-KCRNRRREL- - - -TDTLQAETDQLEDEKSALQTEIANL
NP_877587.1     - - - - -EEKRIRRRERENKMAAA-KCRNRRREL- - - -TDTLQAETDQLEDEKSALQTEIANL
NP_034364.1     - - - - -EEKRIRRRERENKMAAA-KCRNRRREL- - - -TDTLQAETDQLEDEKSALQTEIANL
NP_005243.1     - - - - -EEKRIRRRERENKMAAA-KCRNRRREL- - - -TDTLQAETDQLEDEKSALQTEIANL
CAB40144.1      - - - - -EEKRIRRRERENKMAAA-KCRNRRREL- - - -TDTLQAETDQLEDEKSALQTEIANL
FOS_FELCA       - - - - -EEKRIRRRERENKMAAA-KCRNRRREL- - - -TDTLQAETDQLEDEKSALQTEIANL
FOS_MESAU       - - - - -EEKRIRRRERENKMAAA-KCRNRRREL- - - -TDTLQAETDQLEDEKSALQTEIANL
FOS_PIG         - - - - -EEKRIRRRERENKMAAA-KCRNRRREL- - - -TDTLQAETDQLEDEKSALQTEIANL
FOS_RAT         - - - - -EEKRIRRRERENKMAAA-KCRNRRREL- - - -TDTLQAETDQLEDEKSALQTEIANL
CAA75757.1      - - - - -ERNKMAAA-KCRNRRREL- - - -TDTLQAETDQLEDEKSALQTEIANL
E34223          - - - - -RREKENPKERNKMAAA-KCRNRRREL- - - -TDTLQAETDQLEDEKSALQTEIANL
FOS_SHEEP       - - - - -ERNKMAAA-KCRNRRREL- - - -TDTLQAETDQLEDEKSALQTEIANL
NP_056890.1     - - - - -EVKRRIRRRERENKMAAA-KCRNRRREL- - - -TDTLQAETDQLEDEKSALQTEIANL
NP_955598.1     - - - - -EVKRRIRRRERENKMAAA-KCRNRRREL- - - -TDTLQAETDQLEDEKSALQTEIANL
FOSX_MSVFR      - - - - -EVKRRIRRRERENKMAAA-KCRNRRREL- - - -TDTLQAETDQLEDEKSALQTEIANL
FOS_MSVFB       - - - - -EEKRIRRRERENKMAAA-KCRNRRREL- - - -TDTLQAETDQLEDEKKSALQTEIANL
1A02F           - - - - -MKRRIRRRERENKMAAA-KSRNRRREL- - - -TDTLQAETDQLEDEKSALQTEIANL
AAA66158.1      - - - - -EEKRIRRRERENKMAAA-KCRNRRREL- - - -TDTLQAETDQLEEEKSALQAEIANL
AAN03532.1      - - - - -EEKRIRRRERENKMAAA-KCRNRRREL- - - -TDTLQAETDQLEEEKSALQAEIANL
NP_990839.1     - - - - -EEKRIRRRERENKMAAA-KCRNRRREL- - - -TDTLQAETDQLEEEKSALQAEIANL
FOS_AVINK       - - - - -EEKRIRRRERENKMAAA-KCRNRRREL- - - -TDTLQAETDQLEEEKSALQAEIANL
AAO11836.1      - - - - -EEKRIRRRERENKMAAA-KCRNRRREL- - - -TDTLQAETDQLEEEKSALQTEIANL
CAD56866.1      - - - - -EEKRIRRRERENKMAAA-KCRNRRREL- - - -TDTLQAETDKLEEEKAALMEIANL
BAB39769.2      - - - - -EEKRVRRERENKMAAA-KCRNRRREL- - - -TDTLQAETDQLEDEKSALQNDIANL
NP_991132.1     - - - - -EEKRVRRERENKMAAA-KCRNRRREL- - - -TDTLQAETDQLEDEKSALQNDIANL
BAC77043.1      - - - - -EEKRVRRERENKMAAA-KCRNRRREL- - - -TDTLQAETDQLEDEKSALQNDITNL
FOS_CYPKA       - - - - -EEKRVRRERENKMAAA-KCRNRRREL- - - -TDTLQAETDELEDEKSALQNDIANL
AAK58088.1      - - - - -EEKRVRRERENKMAAA-KCRNRRREL- - - -TDTLQAETDQLEDEKSALQNDIASL
FOS_FUGRU       - - - - -EEKRIRRRERENKQAAA-KCRNRRREL- - - -TDTLQAETDQLEDEKSSLQNDIANL
FOS_TETFL       - - - - -EEKRIRRRERENKQAAA-KCRNRRREL- - - -TDSLQAETDQLEAEKSSLQNDIANL
```

BAC77045.1 -----EEKKRVRRERENKQAAA-KCRNRRKEL----TDTLQGETDELEDEKXSALQNDIANL  
BAC77046.1 -----EEKKRVRRERENKQAAA-KCRNRRKEL----TDTLQGETDELEDEKXSALQNDIANL  
A60089 -----EEKKRVRRERENKMAAA-KCRNRRREL----TDTLQAEETDDLEDQKSDLQAEIASL  
AAC59780.1 -----EEKRRI RRERENKIAAAA-KCRNRRREL----IDTLQAEETDQLEDEKXSALQAEIDEL  
CAD56865.1 -----EEKRRI RRERENKIAAAA-KCRNRRREL----IDTLQAEETDQLEDEKXSALQAEIDEL  
AAC52888.1 -----EERRRVRRERENKLA AAA-KCRNRRKEL----TDFLQAEETDKLEDEKXSGLQREIEEL  
AAH52917.1 -----EERRRVRRERENKLA AAA-KCRNRRKEL----TDFLQAEETDKLEDEKXSGLQREIEEL  
AAP36227.1 -----EERRRVRRERENKLA AAA-KCRNRRKEL----TDFLQAEETDKLEDEKXSGLQREIEEL  
NP\_034365.1 -----EERRRVRRERENKLA AAA-KCRNRRKEL----TDFLQAEETDKLEDEKXSGLQREIEEL  
NP\_005429.1 -----EERRRVRRERENKLA AAA-KCRNRRKEL----TDFLQAEETDKLEDEKXSGLQREIEEL  
NP\_037085.1 -----EERRRVRRERENKLA AAA-KCRNRRKEL----TDFLQAEETDKLEDEKXSGLQREIEEL  
CAD56862.1 -----LEERRRI RRERENKMAAA-KCRNRRREL----TETLQNETDQLEDEKXSRLQKEIAGL  
NP\_005244.1 -----EEKRRI RRERENKLA AAA-KCRNRRREL----TEKLQAEETEELKEEKSGLQKEIAEL  
NP\_032063.2 -----EEKRRI RRERENKLA AAA-KCRNRRREL----TEKLQAEETEELKEEKSGLQKEIAEL  
AAA61951.1 -----EEKRRI RRERENKLA AAA-KCRNRRREL----TEKLQAEETEELKEEKSGLQKEIAEL  
FRA2\_MOUSE -----EEKRRI RRERENKLA AAA-KCRNRRREL----TEKLQAEETEELKEEKSGLQKEIAEL  
AAC08718.1 -----EEKRRI RRERENKLA AAA-KCRNRRREL----TEKLQAEETEELKEEKSGLQKEIAEL  
AAC08724.1 -----EEKRRI RRERENKLA AAA-KCRNRRREL----TEKLQAEETEELKEEKSGLQKEIAEL  
AAC08727.1 -----EEKRRI RRERENKLA AAA-KCRNRRREL----TEKLQAEETEELKEEKSGLQKEIAEL  
AAC08730.1 -----EEKRRI RRERENKLA AAA-KCRNRRREL----TEKLQAEETEELKEEKSGLQKEIAEL  
NP\_037086.1 -----EEKRRI RRERENKLA AAA-KCRNRRREL----TEKLQAEETEELKEEKSGLQKEIAEL  
AAC08715.1 -----EEKRRI RRERENKLA AAA-KCRNRRREL----TEKLQAEETEELKEEKSGLQKEIAEL  
FRA2\_CHICK -----EEKRRI RRERENKLA AAA-KCRNRRREL----TEKLQAEETEELKEEKSGLQKEIAEL  
AAC59866.1 -----EEKRRI RRERENKLA AAA-KCRNRRREL----TEKLQAEETEELKEEKSGLQKEIAEL  
CAD56863.1 -----EEKRRI RRERENKLA AAA-KCRNRRREL----TEKLQAEETEELKEEKSGLQKEIAEL  
AAF01350.1 -----EEKRRI RRERENKLA AAA-KCRNRRREL----TEKLQAEETEELKEEKSGLQKEIAEL  
XP\_218419.1 -----EEKRRI RRERENKLA AAA-KCRNRRREL----TEKLQAEETEELKEEKSGLQKEIAEL  
NP\_032062.1 -----EEKRRI RRERENKLA AAA-KCRNRRREL----TEKLQAEETEELKEEKSGLQKEIAEL  
FOSB\_HUMAN -----EEKRRI RRERENKLA AAA-KCRNRRREL----TEKLQAEETEELKEEKSGLQKEIAEL  
NP\_006723.1 -----EEKRRI RRERENKLA AAA-KCRNRRREL----TEKLQAEETEELKEEKSGLQKEIAEL  
CAD56864.1 -----EEKRRI RRERENKLA AAA-KCRNRRREL----TEKLQAEETEELKEEKSGLQKEIAEL  
A35847 -----EQKRAVRRERENKQAAA-RCRKRRVDQ---TNELTEEVEQLEKRGESMRKEIEVL  
NP\_733306.1 -----EQKRAVRRERENKQAAA-RCRKRRVDQ---TNELTEEVEQLEKRGESMRKEIEVL  
NP\_476587.1 -----EQKRAVRRERENKQAAA-RCRKRRVDQ---TNELTEEVEQLEKRGESMRKEIEVL  
XP\_318333.1 -----EEKRRI RRERENKQAAA-RCRKRREDH---TNELVDETDQLEKQRQSLAQEIQQQ  
NP\_504557.1 -----DDKRLKRRQRNKEAAA-RCRQRRI DL---MKELQDQVNDFKNSNDKKMAECNNI  
T31799 -----DDKRLKRRQRNKEAAA-RCRQRRI DL---MKELQDQVNDFKNSNDKKMAECNNI  
CAE64529.1 -----DDKRLKRRQRNKEAAA-RCRQRRI DL---MKELQDQVNGFKHLNDKKTSDINDL  
1GD2 -----QEPSSKRKAQNRAAQR-AFRKRKEDH---LKALETQVVTLLKELHSSTTLENDQL  
BAA87082.1 -----QEPSSKRKAQNRAAQR-AFRKRKEDH---LKALETQVVTLLKELHSSTTLENDQL  
NP\_593662.1 -----QEPSSKRKAQNRAAQR-AFRKRKEDH---LKALETQVVTLLKELHSSTTLENDQL  
S15664 -----QEPSSKRKAQNRAAQR-AFRKRKEDH---LKALETQVVTLLKELHSSTTLENDQL  
CAB91681.2 -----TEPSSKRKAQNRAAQR-AFRERKEKH---LKDLETKVEELKKISETANHENEIL  
XP\_323224.1 -----TEPSSKRKAQNRAAQR-AFRERKEKH---LKDLETKVEELKKISETANHENEIL  
EAA62093.1 -----SEPTSKRKAQNRAAQR-AFRERKEKH---LKDLEAKVEELQKASDSANQENGLL  
XP\_388976.1 -----SEPSSKRKAQNRAAQR-AFRERKEKH---LKDLETKVDELEKASQAANHENSML  
EAA47389.1 -----KRKAQNRAAQR-AFRERKERH---VKDLEAKLADLEAAQQQAATENEKL  
XP\_329184.1 -----TPAQSRKKAQNRAAQR-AFRERKERH---VKELENRLQQLLEEAQVTRSENEKL  
EAA60905.1 -----TPAQSRKKAQNRAAQR-AFRERKERH---VRDLEEKVSNLQQESNNLLADNERL  
EAK95559.1 -----EELQMKRKAQNRAAQR-AFRERKESK---LKELEAKLLASEEERQKLLDELEQI  
EAK95697.1 -----EELQMKRKAQNRAAQR-AFRERKESK---LKELEAKLLASEEERQKLLDELEQI  
FCR3\_CANAL -----EELQMKRKAQNRAAQR-AFRERKESK---LKELEAKLLASEEERQKLLDELEQI  
NP\_011854.1 -----DDSKAKKKAQNRAAQR-AFRERKEAR---MKELQDKLLESERNRQSLKKEIEEL  
NP\_982964.1 -----EKKKAQNRAAQR-AFRERKEAR---LRELEQKLKESQNRDALFREVEQL  
AAB29937.1 -----SEAKSRRTAQNRAAQR-AFRDRKEAK---MKSLQERVELLEQKDAQNKTTTDFL  
NP\_010711.1 -----SEAKSRRTAQNRAAQR-AFRDRKEAK---MKSLQERVELLEQKDAQNKTTTDFL  
AAA34463.1 -----SEAKSRRTAQNRAAQR-AFRDRKEAK---MKSLQERVELLEQKDAQNKTTTDFL

AAD00802.1 -----TEPKSKRTAQNRRAAQR-AYRERKERK-----MKELEDKVRLLLEDANVRALTETDFL  
EAL02912.1 -----TEPKSKRTAQNRRAAQR-AYRERKERK-----MKELEDKVRLLLEDANVRALTETDFL  
CAA37827.1 -----PETKQKRRTAQNRRAAQR-AFRERKERK-----MKELEKKVQSLESIQQQNEVEATFL  
NP\_013707.1 -----PETKQKRRTAQNRRAAQR-AFRERKERK-----MKELEKKVQSLESIQQQNEVEATFL  
CAA41536.1 -----PETKQKRRTAQNRRAAQR-AFRERKERK-----MKELEKKVQSLESIQQQNEVEATFL  
CAA43195.1 -----PETKQKRRTAQNRRAAQR-AFRERKERK-----MKELEKKVQSLESIQQQNEVEATFL  
AP1\_KLULA -----TEAKDKRTAQNRRAAQR-AFRERRERK-----MKELEDKVSQLESLSNKQSELETKFL  
NP\_984291.1 -----TEAKNRRTAQNRRAAQR-AFRERKERK-----MRDLEDQVRRLEEERSSSAECEVQSL  
AAC49426.1 -----DEELQKKKRQNRDAQR-AYRERKNNK-----LQVLEETIESLSKVVKNYETKLNRL  
NP\_012283.1 -----DEELQKKKRQNRDAQR-AYRERKNNK-----LQVLEETIESLSKVVKNYETKLNRL  
EAA56950.1 -----RRRAQNRSQR-AYRERKDQR-----IKDLEQMLNDSKQRNDLLSQAYQNL  
XP\_323551.1 -----RRRAQNRSQR-AYRERKDQR-----IKDLEQMLNEAKQHNNALGQAYAAL  
EAA48684.1 -----RRQELNRQAQR-THRERKELY-----IKALEDEVLRRLKETYSNVSQLAKDNL  
EAK84283.1 -----RRKEQNRNAQR-RLRVRREEH-----ILQLQAQLEELHRRSQQSEESHFL  
EAK86097.1 -----LEQKSRREQNRNAQR-RLRDRKEDH-----VFKLEGEVAQLRQDEQRCSKMRDL  
NP\_065505.1 -----EEQKERRRSINRRASK-NFLKRRRIF-----EEQKEKGLINLKYENSRLRCQVEKR  
AAC72896.1 -----LIRDIRRRGKNKVAAQ-NCRKRKLDQ-----ILTLEDEVNAVVKRKTQLNQDRDHL  
AAC72897.1 -----LIRDIRRRGKNKVAAQ-NCRKRKLDQ-----ILTLEDEVNAVVKRKTQLNQDRDHL  
A33111 -----LIRDIRRRGKNKVAAQ-NCRKRKLDQ-----ILTLEDEVNAVVKRKTQLNQDRDHL  
NP\_732833.1 -----LIRDIRRRGKNKVAAQ-NCRKRKLDQ-----ILTLEDEVNAVVKRKTQLNQDRDHL  
NP\_732834.1 -----LIRDIRRRGKNKVAAQ-NCRKRKLDQ-----ILTLEDEVNAVVKRKTQLNQDRDHL  
NP\_732835.1 -----LIRDIRRRGKNKVAAQ-NCRKRKLDQ-----ILTLEDEVNAVVKRKTQLNQDRDHL  
T13936 -----LIRDIRRRGKNKVAAQ-NCRKRKLDQ-----ILTLEDEVNAVVKRKTQLNQDRDHL  
AAB59246.1 -----LIRDLRRRGKNKVAAQ-NCRKRKLDQ-----ILTLEDEVNAVVKRKTQLNQDRDHL  
XP\_309091.1 -----LIRDIRRRGKNKVAAQ-NCRKRKLDQ-----IVTLADEVKDMKMRKERLMRDREMV  
A49672 -----LIRDIRRRGKNKMAAQ-NCRKRKLDT-----ILNLERDVEDLQRDKARLLREKVEF  
AAA20466.1 -----LIRDIRRRGKNKMAAQ-NCRKRKLDT-----ILNLERDVEDLQRDKARLLREKVEF  
AAC0108.1 -----LIRDIRRRGKNKMAAQ-NCRKRKLDT-----ILNLERDVEDLQRDKARLLREKVEF  
BAC03440.1 -----LIRDIRRRGKNKMAAQ-NCRKRKLDT-----ILNLERDVEDLQRDKARLLREKVEF  
NP\_032712.2 -----LIRDIRRRGKNKMAAQ-NCRKRKLDT-----ILNLERDVEDLQRDKARLLREKVEF  
XP\_340887.1 -----LIRDIRRRGKNKMAAQ-NCRKRKLDT-----ILNLERDVEDLQRDKARLLREKVEF  
BAB23483.1 -----LIRDIRRRGKNKMAAQ-NCRKRKLDT-----ILNLERDVEDLQRDKARLLREKVEF  
CAB46813.1 -----LIRDIRRRGKNKMAAQ-NCRKRKLDT-----ILNLERDVEDLQRDKARLLREKVEF  
NFL1\_MOUSE -----LIRDIRRRGKNKMAAQ-NCRKRKLDT-----ILNLERDVEDLQRDKARLLREKVEF  
NP\_003195.1 -----LIRDIRRRGKNKMAAQ-NCRKRKLDT-----ILNLERDVEDLQRDKARLLREKVEF  
AAC83235.1 -----LIRDIRRRGKNKMAAQ-NCRKRKLDT-----ILNLERDVEDLQRDKARLLRE-----  
AAH59314.1 -----LIRDIRRRGKNKMAAQ-NCRKRKLDT-----ILNLEQEVKHLNRERNSQLREKGEN  
AAH49219.1 -----LIRDIRRRGKNKVAAQ-NCRKRKLDI-----ILNLEDDVCNLQAKKETLKREQAQC  
AAH56142.1 -----LIRDIRRRGKNKVAAQ-NCRKRKLDI-----ILNLEDDVCNLQAKKETLKREQAQC  
BAA76288.1 -----LIRDIRRRGKNKVAAQ-NCRKRKLDI-----ILNLEDDVCNLQAKKETLKREQAQC  
AAF17228.1 -----LIRDIRRRGKNKVAAQ-NCRKRKLDI-----ILNLEDDVCNLQAKKETLKREQAQC  
AAF61404.1 -----LIRDIRRRGKNKVAAQ-NCRKRKLDI-----ILNLEDDVCNLQAKKETLKREQAQC  
NP\_004280.4 -----LIRDIRRRGKNKVAAQ-NCRKRKLDI-----ILNLEDDVCNLQAKKETLKREQAQC  
NP\_035033.1 -----LIRDIRRRGKNKVAAQ-NCRKRKLDI-----ILNLEDDICNLQAKKEALKNEQTQC  
XP\_231763.2 -----LIRDIRRRGKNKVAAQ-NCRKRKLDI-----ILNLEDDICNLQAKKEALKSEQTQW  
A54692 -----LVRDIRRRGKNKVAAQ-NCRKRKLET-----IVQLERELERLTNERERLLRARGE  
AAA35612.1 -----LVRDIRRRGKNKVAAQ-NCRKRKLET-----IVQLERELERLTNERERLLRARGE  
NP\_006154.1 -----LVRDIRRRGKNKVAAQ-NCRKRKLET-----IVQLERELERLTNERERLLRARGE  
NP\_032711.2 -----LVRDIRRRGKNKVAAQ-NCRKRKLET-----IVQLERELERLSSERERLLRARGE  
S32537 -----LVRDIRRRGKNKVAAQ-NCRKRKLET-----IVQLERELERLSSERERLLRARGE  
XP\_345884.1 -----LVRDIRRRGKNKVAAQ-NCRKRKLET-----IVQLERELERLGSERERL-----  
AAH45852.1 -----LVRDIRRRGKNKVAAQ-NCRKRKLEN-----IVGLEEYELDSLKEEKERLMKEKSER  
NP\_878309.1 -----LVRDIRRRGKNKVAAQ-NCRKRKLEN-----IVGLEEYELDSLKEEKERLMKEKSER  
AAH61724.1 -----LIRDIRRRGKNKVAAQ-NCRKRKLEN-----IVELEQDLGHLKDEREKLLREKGEN  
NP\_113977.1 -----LIRDIRRRGKNKVAAQ-NCRKRKLEN-----IVELEQDLGHLKDEREKLLREKGEN  
I49261 -----LIRDIRRRGKNKVAAQ-NCRKRKLEN-----IVELEQDLGHLKDEREKLLREKGEN  
NP\_035032.1 -----LIRDIRRRGKNKVAAQ-NCRKRKLEN-----IVELEQDLGHLKDEREKLLREKGEN

I59340 -----LIRDIRRRGKNKVAAQ-NCRKRKLEN-----IVELEQDL D H L K D E K E K L L K E K G E N  
NP\_006155.2 -----LIRDIRRRGKNKVAAQ-NCRKRKLEN-----IVELEQDL D H L K D E K E K L L K E K G E N  
NP\_990448.1 -----LIRDIRRRGKNKVAAQ-NCRKRKLEN-----IVELEQDL S H L K D E R E K L L K E K G E N  
AAH43997.1 -----LIRDIRRRGKNKVAAQ-NCRKRKMEN-----IVELETDL D T L K Y E K E K L L A E R G E Y  
NP\_778208.1 -----LVRDIRRRGKNKVAAQ-NCRKRKLEN-----IVHLESEL G Q L R A Q R E H L A R E R L E F  
AAB84100.1 -----RRRSKNRIAAQ-RCRKRKLD-----IQNLESEIEK L Q S E K E S L L K E R D H I  
NP\_031546.1 -----RRRSKNRIAAQ-RCRKRKLD-----IQNLESEIEK L Q S E K E S L L K E R D H I  
BAA95505.1 -----RRRSKNRIAAQ-RCRKRKLD-----IQNLESEIEK L Q S E K E S L L K E R D H I  
NP\_001177.1 -----RRRSKNRIAAQ-RCRKRKLD-----IQNLESEIEK L Q S E K E S L L K E R D H I  
XP\_221712.2 -----RRRSKNRIAAQ-RCRKRKLD-----IQNLESEIEK L Q N E K E S L L K E R D H I  
AAB84101.1 -----RRRSKNRIAAQ-RCRKRKLD-----IQNLESEIEK L -----  
AAH51242.1 -----RRRSKNRIAAQ-RCRKRKLD-----IQNLECEIRK L V C E K E K L L S E R N H L  
NP\_031547.1 -----RRRSKNRIAAQ-RCRKRKLD-----IQNLECEIRK L V C E K E K L L S E R N H L  
AAK48898.1 -----RRRSKNRIAAQ-RCRKRKLD-----IQNLECEIRK L V C E K E K L L S E R N Q L  
NP\_068585.1 -----RRRSKNRIAAQ-RCRKRKLD-----IQNLECEIRK L V C E K E K L L S E R N Q L  
1404381A -----RIKAERKMRNRIAS-KCRKRKLER-----IARLEEKV K T L K A Q N S E L A S T A N M L  
1411298A -----RIKAERKMRNRIAS-KCRKRKLER-----IARLEEKV K T L K A Q N S E L A S T A N M L  
NP\_068607.1 -----RIKAERKMRNRIAS-KCRKRKLER-----IARLEEKV K T L K A Q N S E L A S T A N M L  
AAH09874.2 -----RIKAERKMRNRIAS-KCRKRKLER-----IARLEEKV K T L K A Q N S E L A S T A N M L  
TVHUJN -----RIKAERKMRNRIAS-KCRKRKLER-----IARLEEKV K T L K A Q N S E L A S T A N M L  
AP1\_CHICK -----RIKAERKMRNRIAS-KCRKRKLER-----IARLEEKV K T L K A Q N S E L A S T A N M L  
AP1\_COTJA -----RIKAERKMRNRIAS-KCRKRKLER-----IARLEEKV K T L K A Q N S E L A S T A N M L  
AP1\_PIG -----RIKAERKMRNRIAS-KCRKRKLER-----IARLEEKV K T L K A Q N S E L A S T A N M L  
AP1\_SERCA -----RIKAERKMRNRIAS-KCRKRKLER-----IARLEEKV K T L K A Q N S E L A S T A N M L  
CAA31252.1 -----RIKAERKMRNRIAS-KCRKRKLER-----IARLEEKV K T L K A Q N S E L A S T A N M L  
NP\_034721.1 -----RIKAERKMRNRIAS-KCRKRKLER-----IARLEEKV K T L K A Q N S E L A S T A N M L  
NP\_002219.1 -----RIKAERKMRNRIAS-KCRKRKLER-----IARLEEKV K T L K A Q N S E L A S T A N M L  
1FOSF -----RKRMRNRIAS-KSRKRKLER-----IARLEEKV K T L K A Q N S E L A S T A N M L  
1FOSH -----ERKMRNRIAS-KSRKRKLER-----IARLEEKV K T L K A Q N S E L A S T A N M L  
TJUN\_AVIS1 -----RIKAERKMRNRIAS-KSRKRKLER-----IARLEEKV K T L K A Q N S E L A S T A N M L  
AAA42416.1 -----RIKAERKMRNRIAS-KSRKRKLER-----IARLEEKV K T L K A Q N S E L A S T A N M L  
1JNM -----KAERKMRNRIAS-KSRKRKLER-----IARLEEKV K T L K A Q N S E L A S T A N M L  
1A02J -----MKAERKMRNRIAS-KSRKRKLER-----IARLEEKV K T L K A Q N S E L A S T A N M L  
AAH41183.1 -----RIKAERKMRNVAAS-KCRKRKLER-----IGRLEDK V K T L K S Q N S E L A S T A N M L  
CAB51636.1 -----RIKAERKMRNVAAS-KCRKRKLER-----IGRLEDK V K T L K S Q N S E L A S T A N M L  
BAC77044.1 -----RIKAERKMRNRIAS-KCRKRKLER-----ISRLEDK V K N L K S Q N S E L A S T A N M L  
CAD56856.1 -----RIKAERKMRNRIAS-KCRKRKLER-----ISRLEDK V K N L K S Q N S E L A S T A N M L  
CAB51637.1 -----RIKAERKMRNRIAS-KCRKRKLER-----ISRLEDK V K N L K S Q N S E L A S T A N M L  
NP\_956281.1 -----RIKAERKMRNRIAS-KCRKRKLER-----ISRLEDK V K T L K S Q N S E L A S T A N M L  
I51606 -----RIKAERKMRNRIAS-KCRKRKLER-----FARLEDK V K N L K S Q N S E L A S T A N M L  
CAD56859.1 -----RIKAERKLRNRIAS-KCRKRKLER-----ISRLEEK V K V L K S Q N S D L A S T A M L  
AAA39345.1 -----RIKAERKLRNRIAS-KCRKRKLER-----ISRLEEK V K T L K S Q N T E L A S T A S L L  
AAK01362.1 -----RIKAERKLRNRIAS-KCRKRKLER-----ISRLEEK V K T L K S Q N T E L A S T A S L L  
AAF97784.1 -----IAAS-KCRKRKLER-----ISRLEEK V K T L K S Q N T E L A S T A S L L  
TVHUJD -----RIKAERKLRNRIAS-KCRKRKLER-----ISRLEEK V K T L K S Q N T E L A S T A S L L  
NP\_620230.1 -----RIKAERKLRNRIAS-KCRKRKLER-----ISRLEEK V K T L K S Q N T E L A S T A S L L  
NP\_034722.1 -----RIKAERKLRNRIAS-KCRKRKLER-----ISRLEEK V K T L K S Q N T E L A S T A S L L  
NP\_005345.2 -----RIKAERKLRNRIAS-KCRKRKLER-----ISRLEEK V K T L K S Q N T E L A S T A S L L  
JUND\_CHICK -----RIKAERKLRNRIAS-KCRKRKLER-----ISRLEEK V K S L K S Q N T E L A S T A S L L  
CAD56861.1 -----RIKAERKLRNRIAS-KCRKRKLER-----ISRLEDK V K S L K T Q N T E L A S T A S V L  
CAD56860.1 -----RLKAERKLRNRIAS-KCRMRKLER-----ISRLEDK V K T L K S H N T D L A S T A S L L  
AAL02138.1 -----LIKAERKLRNRIAS-KCRKRKLER-----ISRLESK V K D L K T Q N T D L S T T A N Q L  
JUNB\_RAT -----RIKVERKLRNRLAAT-KCRKRKLER-----IARLEDK V K T L K A E N A G L S S A A G L L  
NP\_032442.1 -----RIKVERKLRNRLAAT-KCRKRKLER-----IARLEDK V K T L K A E N A G L S S A A G L L  
BAC40473.1 -----RIKVERKLRNRLAAT-KCRKRKLER-----IARLEDK V K T L K A E N A G L S S A A G L L  
AAA74916.1 -----RIKVERKLRNRLAAT-KCRKRKLER-----IARLEDK V K T L K A E N A G L S S A A G L L  
NP\_002220.1 -----RIKVERKLRNRLAAT-KCRKRKLER-----IARLEDK V K T L K A E N A G L S S T A G L L

NP\_068608.2 -----RIKVERKRLRNRLAAT-KCRKRKLER-----IARLEDKVKVTLKAENAGLSSTAGLL  
AAH09465.1 -----RIKVERKRLRNRLAAT-KCRKRKLER-----IARLEDKVKVTLKAENAGLSSTAGLL  
AAF75552.1 -----RIKVERKRLRNRLAAT-KCRKRKLER-----IARLEDKVKVTLKAENAGL-----  
AAH53154.1 -----RIKAERKRLRNLLAAT-KCRRRKLER-----IARLEEKVKVLKSDNAGLSNTASVL  
JUNB\_CYPCA -----RIKAERKRLRNRLAAT-KCRKRKLER-----ISRLEEKVKVLKNDNAGLSNTASVL  
AAH53234.1 -----RIKAERKRLRNRLAAT-KCRRRKLER-----ISRLEDKVKVLKSDNAGLSSTASLL  
CAD56858.1 -----RIKAERKRLRNRIAAS-KCRRRKLER-----ISRLEDKVKVLKTDNAGLSNTASLL  
CAD56857.1 -----RIKAERKRMNRVAAS-KCRKRKLER-----IARLEDRVKNLKSQNTLVSSANVL  
NP\_476586.1 -----KIKLERKQRNRVAAS-KCRKRKLER-----ISKLEDRVVKVLKGENVDLASIVKNL  
TVVFFJD -----KIKLERKQRNRVAAS-KCRKRKLER-----ISKLEDRVVKVLKGENVDLASIVKNL  
XP\_316420.1 -----RIKLERKRLRNVAAS-KCRKRKLER-----ISKLEDRVKELKAQNAELGGVVCNL  
CAE59807.1 -----KKKLERKRARNRQAAT-KCRQKKMDR-----IKELEEQVLHEKHRGQRLDAELLEL  
NP\_495947.1 -----KKKLERKRARNRQAAT-KCRQKKMDR-----IKELEEQVLHEKHRGQRLDAELLEL  
A34785 -----DEKRRKFLERNRAAAS-RCRQKRKVW----VQSLEKKAEDLSSLNGQLQSEVTLL  
AAA40394.1 -----DEKRRKFLERNRAAAS-RCRQKRKVW----VQSLEKKAEDLSSLNGQLQSEVTLL  
AAH42210.1 -----DEKRRKFLERNRAAAS-RCRQKRKVW----VQSLEKKAEDLSSLNGQLQSEVTLL  
B42026 -----DEKRRKFLERNRAAAS-RCRQKRKVW----VQSLEKKAEDLSSLNGQLQSEVTLL  
A39429 -----DEKRRKFLERNRAAAS-RCRQKRKVW----VQSLEKKAEDLSSLNGQLQSEVTLL  
S05380 -----DEKRRKFLERNRAAAS-RCRQKRKVW----VQSLEKKAEDLSSLNGQLQSEVTLL  
AAB64016.1 -----DEKRRKFLERNRAAAS-RCRQKRKVW----VQSLEKKAEDLSSLNGQLQSEVTLL  
AAB64017.1 -----DEKRRKFLERNRAAAS-RCRQKRKVW----VQSLEKKAEDLSSLNGQLQSEVTLL  
ATF2\_HUMAN -----DEKRRKFLERNRAAAS-RCRQKRKVW----VQSLEKKAEDLSSLNGQLQSEVTLL  
ATF2\_MOUSE -----DEKRRKFLERNRAAAS-RCRQKRKVW----VQSLEKKAEDLSSLNGQLQSEVTLL  
BAC32623.1 -----DEKRRKFLERNRAAAS-RCRQKRKVW----VQSLEKKAEDLSSLNGQLQSEVTLL  
C42026 -----DEKRRKFLERNRAAAS-RCRQKRKVW----VQSLEKKAEDLSSLNGQLQSEVTLL  
A42026 -----DEKRRKFLERNRAAAS-RCRQKRKVW----VQSLEKKAEDLSSLNGQLQSEVTLL  
AAA35951.1 -----DEKRRKFLERNRAAAS-RCRQKRKVW----VQSLEKKAEDLSSLNGQLQSEVTLL  
NP\_001871.2 -----DEKRRKFLERNRAAAS-RCRQKRKVW----VQSLEKKAEDLSSLNGQLQSEVTLL  
NP\_033845.1 -----DEKRRKFLERNRAAAS-RCRQKRKVW----VQSLEKKAEDLSSLNGQLQSEVTLL  
NP\_112280.1 -----DEKRRKFLERNRAAAS-RCRQKRKVW----VQSLEKKAEDLSSLNGQLQSEVTLL  
BAC29065.1 -----DEKRRKFLERNRAAAS-RCRQKRKVW----VQSLEKKAEDLSSLNGQLQ-----  
NP\_990235.1 -----DEKRRKFLERNRAAAS-RCRQKRKVW----VQSLEKKAEDLSSLNGQLQNEVTLL  
1604249B -----DEKRRKFLERNRAAAS-RCRQKRKVW----VQSLEKKAEDLSSLNGQLQSEVTLL  
JC4028 -----DEKRSKIIQRNRAAAS-RCRQKRKVW----VQSLEKKADELISLNGYLQNEVTLL  
ATF7\_HUMAN -----DERRQRFLERNRAAAS-RCRQKRKLW----VSSLEKKAEEELTSQNIQLSNEVTLL  
NP\_006847.1 -----DERRQRFLERNRAAAS-RCRQKRKLW----VSSLEKKAEEELTSQNIQLSNEVTLL  
NP\_666177.1 -----DERRQRFLERNRAAAS-RCRQKRKLW----VSSLEKKAEEELTSQNIQLSNEVTLL  
AAB29745.1 -----DERRQRFLERNRAAAS-RCRQKRKLW----VSSLEKKAEEELTSQNIQLSNEVTLL  
XP\_235694.2 -----DERRQRFLERNRAAAS-RCRQKRKLW----VSSLEKKAEEELTSQNIQLSNEVTLL  
CRB5\_MOUSE -----DERRRKFLERNRAAAT-RCRQKRKVW----VMSLEKKAEEELTQTNMQLQNEVSML  
I78877 -----DERRRKFLERNRAAAT-RCRQKRKVW----VMSLEKKAEEELTQTNMQLQNEVSML  
NP\_004895.1 -----DERRRKFLERNRAAAT-RCRQKRKVW----VMSLEKKAEEELTQTNMQLQNEVSML  
NP\_878901.1 -----DERRRKFLERNRAAAT-RCRQKRKVW----VMSLEKKAEEELTQTNMQLQNEVSML  
NP\_878902.1 -----DERRRKFLERNRAAAT-RCRQKRKVW----VMSLEKKAEEELTQTNMQLQNEVSML  
AAH29022.1 -----DERRRKFLERNRAAAT-RCRQKRKVW----VMSLEKKAEEELTQTNMQLQNEVSML  
NP\_766316.1 -----DERRRKFLERNRAAAT-RCRQKRKVW----VMSLEKKAEEELTQTNMQLQNEVSML  
AAH59400.1 -----DERRRKFLERNRAAAT-RCRQKRKVW----VMSLEKKAEEELTQTNMQLQNEVSML  
NP\_594500.1 -----DEKRRRILERNRIAAS-KFRQKKKEW----IKELEQTANAAFEQSKRLQLLLSQL  
NP\_595707.1 -----DMKRRRFLERNRIAAS-KCRQKKKLW----TQNLEKTAHIAEQSKALRILVSQL  
XP\_327898.1 -----DHKRNKFLERNRLAAS-KCREKKKLY----TQELEGTKINLEARNVSLQREYSIL  
EAA58248.1 -----DDKQEKTRARNRLAAS-KCRQKKKEQ----NHMLETRYEQEKMKNEELTRTVNSL  
XP\_389177.1 -----SAKREKFLKRNRIAAS-KCRQKKKQO----NEALE-----EHLCR-----  
CAC18235.2 -----EEKRKNFLERNRVAAL-KCRQKKQW----LANLQOKVEMFSSSENDALTAITITQL  
XP\_326838.1 -----RVAAL-KCRQKKQW----LANLQOKVEMFSSSENDALTAITITQL  
XP\_390318.1 -----EEKRKNFLERNRVAAL-KCRQKKQW----LANLQTKVEMFSTENDALTAQITITQL  
CAD21519.1 -----EEKRKNFLERNRVAAL-KCRQKKQW----LANLQNKVEMYSSSENDALTAQITITQL  
EAA57243.1 -----EEKRKNFLERNRVAAL-KCRQKKQW----LANLQSKVEMYGAENENLTAQIGQL

AAN75015.1 -----EEKRKNFLERNRVAAL-KCRQRKKQW----LANLQAKVELFTSENDALTTTQV  
BAA12194.1 -----EEKRKSFLERNRQAAL-KCRQRKKQW----LSNLQAKVEFYGNENEILSAQVSAL  
NP\_595652.1 -----EEKRKSFLERNRQAAL-KCRQRKKQW----LSNLQAKVEFYGNENEILSAQVSAL  
EAK94532.1 -----DDKRNFLERNRVAAS-KCRQRKKLL----IQKMEEELEFYSNQYRELSAEVNEL  
NP\_014232.1 -----ERKRKEFLERNRVAAS-KFRKRKKEY----IKKIENDLQFYESEYDDLQVIGKL  
NP\_985572.1 -----DRKRKEFLERNRVAAS-KFRKRKKEY----IKKIETDLQFYETENDLTSFIDSL  
CAA09717.1 -----ARKRKEFLERNRVAAS-RFRKRKKEY----IKRIEADVSFYESEYNDLSACLASL  
CAB63430.2 -----DERRNTILERNKAAAV-RYRKRKKEY----HDDMMGRVQAMEAEKNQLLTQNVL  
NP\_497914.1 -----DERRNTILERNKAAAV-RYRKRKKEY----HDDMMGRVQAMEAEKNQLLTQNVL  
XP\_382926.1 -----DPRRRRILERNRVAAT-KCRLRKRDE----ASALASQEQAMEDQNYLSSCFDSL  
XP\_387965.1 -----ANRQQRVMEQNRLAAS-RFRKRKRST----ADALGMDLERLEDOHRELSKHRNGL  
XP\_390615.1 -----EKQYLKILERNRVAAS-NCRARKQEQ----QDKLNAEVEKLEDHRHRELSASCNEL  
NP\_010964.1 -----KRARLLERNRVAAS-KCRQRKKMS----QLQLQREFDQISKENTMMKKKIENY  
NP\_012228.1 -----KRARLLERNRVAAS-KCRQRKKVA----QLQLQKEFNEIKDENRILLKKNLYY  
NP\_983992.1 -----KRARLLERNRVAAS-KCRQRKKIA----QLQLQKDVDILTENKEIRRELEY  
EAL00056.1 -----KKERLLERNRVAAS-KCRQRKKQE----QVQIQNNIAKMEKELKKKDAKIAEL  
EAA60677.1 -----AEKRAKHLERNRVAAS-KSRQKKKRE----TDQLRTRFQEVSRKSTLEIEIKEL  
NP\_593039.1 -----GTKQSMLKARNRVAAT-KCRIKKKKY----LQTLQDQVNYTSENKELLQSANL  
EAA50250.1 -----DGKRSTVLERNRVAAL-KCRKCKKEF----VQDLEEQCVLETTNHALHTEAQVL  
EAA54021.1 -----DANRNTVLERNRVAAL-KCRKCKKEL----TRDLKEQCCKLETTNRDLQTEAQL  
A49317 -----TRKRELRLMKNRVAAR-ECRRKCKEY----VKCLERNVAVLENQNKTLIEELKAL  
AAF66158.2 -----TRKRELRLMKNRVAAR-ECRRKCKEY----VKCLERNVAVLENQNKTLIEELKAL  
AAC60616.2 -----TRKRELRLMKNRVAAR-ECRRKCKEY----VKCLERNVAVLENQNKTLIEELKAL  
AAO92340.1 -----TRKRELRLMKNRVAAR-ECRRKCKEY----VKCLERNVAVLENQNKTLIEELKAL  
BAA03562.1 -----TRKRELRLMKNRVAAR-ECRRKCKEY----VKCLERNVAVLENQNKTLIEELKAL  
BAA03567.1 -----TRKRELRLMKNRVAAR-ECRRKCKEY----VKCLERNVAVLENQNKTLIEELKAL  
NP\_037218.1 -----TRKRELRLMKNRVAAR-ECRRKCKEY----VKCLERNVAVLENQNKTLIEELKAL  
NP\_038526.1 -----TRKRELRLMKNRVAAR-ECRRKCKEY----VKCLERNVAVLENQNKTLIEELKAL  
JX0307 -----TRKRELRLMKNRVAAR-ECRRKCKEY----VKCLERNVAVLENQNKTLIEELKAL  
CAC34846.1 -----TRKRELRLMKNRVAAR-ECRRKCKEY----VKCLERNVAVLENQNKTLIEELKAL  
CREM\_CANFA -----TRKRELRLMKNRVAAR-ECRRKCKEY----VKCLERNVAVLENQNKTLIEELKAL  
S36101 -----TRKRELRLMKNRVAAR-ECRRKCKEY----VKCLERNVAVLENQNKTLIEELKAL  
NP\_989718.1 -----TRKRELRLMKNRVAAR-ECRRKCKEY----VKCLERNVAVLENQNKTLIEELKAL  
NP\_898831.1 -----TRKRELRLMKNRVAAR-ECRRKCKEY----VKCLERNVAVLENQNKTLIEELKAL  
NP\_898830.1 -----TRKRELRLMKNRVAAR-ECRRKCKEY----VKCLERNVAVLENQNKTLIEELKAL  
NP\_898829.1 -----TRKRELRLMKNRVAAR-ECRRKCKEY----VKCLERNVAVLENQNKTLIEELKAL  
NP\_874386.1 -----TRKRELRLMKNRVAAR-ECRRKCKEY----VKCLERNVAVLENQNKTLIEELKAL  
NP\_874392.1 -----TRKRELRLMKNRVAAR-ECRRKCKEY----VKCLERNVAVLENQNKTLIEELKAL  
NP\_874391.1 -----TRKRELRLMKNRVAAR-ECRRKCKEY----VKCLERNVAVLENQNKTLIEELKAL  
NP\_874390.1 -----TRKRELRLMKNRVAAR-ECRRKCKEY----VKCLERNVAVLENQNKTLIEELKAL  
NP\_874389.1 -----TRKRELRLMKNRVAAR-ECRRKCKEY----VKCLERNVAVLENQNKTLIEELKAL  
AAC19383.1 -----TRKRELRLMKNRVAAR-ECRRKCKEY----VKCLERNVAVLESQNKTLIEELKAL  
CREM\_RAT -----TRKRELRLMKNRVAAR-ECRRKCKEY----VKCLERNVAVLESQNKTLIEELKAL  
I59276 -----TRKRELRLMKNRVAAR-ECRRKCKEY----VKCLERNVAVLESQNKTLIEELKAL  
BAA83552.1 -----TRKRELRLMKNRVAAR-ECRRKCKEY----VKCLERNVAVLESQNKTLIEELKAL  
1DH3 -----KREVRLMKNRVAAR-ESRRKCKEY----VKSLENRVAVLENQNKTLIEELKAL  
AAH41206.1 -----VRKREVRLMKNRVAAR-ECRRKCKEY----VKCLERNVAVLENQNKTLIEELKAL  
AAQ24858.1 -----ARKREVRLMENRVAAR-ECRRKCKEY----VKCLERNVAVLENQNKTLIEELKAL  
CREB\_BOVIN -----ARKREVRLMKNRVAAR-ECRRKCKEY----VKCLERNVAVLENQNKTLIEELKAL  
NP\_112279.1 -----ARKREVRLMKNRVAAR-ECRRKCKEY----VKCLERNVAVLENQNKTLIEELKAL  
NP\_004370.1 -----ARKREVRLMKNRVAAR-ECRRKCKEY----VKCLERNVAVLENQNKTLIEELKAL  
CAA63242.1 -----ARKREVRLMKNRVAAR-ECRRKCKEY----VKCLERNVAVLENQNKTLIEELKAL  
NP\_034082.1 -----ARKREVRLMKNRVAAR-ECRRKCKEY----VKCLERNVAVLENQNKTLIEELKAL  
BAA36482.1 -----ARKREVRLMKNRVAAR-ECRRKCKEY----VKCLERNVAVLENQNKTLIEELKAL  
NP\_776710.1 -----ARKREVRLMKNRVAAR-ECRRKCKEY----VKCLERNVAVLENQNKTLIEELKAL  
NP\_598589.1 -----ARKREVRLMKNRVAAR-ECRRKCKEY----VKCLERNVAVLENQNKTLIEELKAL  
NP\_604391.1 -----ARKREVRLMKNRVAAR-ECRRKCKEY----VKCLERNVAVLENQNKTLIEELKAL

AAH67956.1 -----ARKREVRLMKNREAAR-ECRRKKKEY-----VKCLENRVAVLENQNKTLEELKAL  
NP\_989781.1 -----ARKREVRLMKNREAAR-ECRRKKKEY-----VKCLENRVAVLENQNKTLEELKAL  
S20955 -----ARKREVRLMKNREAAR-ECRRKKKEY-----VKCLENRVAVLENQNKTLEELKAL  
S22298 -----ARKREVRLMKNREAAR-ECRRKKKEY-----VKCLENRVAVLENQNKTLEELKAL  
A35663 -----ARKREVRLMKNREAAR-ECRRKKKEY-----VKCLENRVAVLENQNKTLEELKAL  
A40120 -----ARKREVRLMKNREAAR-ECRRKKKEY-----VKCLENRVAVLENQNKTLEELKAL  
AAB64015.1 -----ARKREVRLMKNREAAR-ECRRKKKEY-----VKCLENRVAVLENQNKTLEELKAL  
NP\_604392.1 -----ARKREVRLMKNREAAR-ECRRKKKEY-----VKCLENRVAVLKNQNKTLEELKAL  
NP\_957203.1 -----TRKREVRLMKNREAAR-ECRRKKKEY-----VKCLENRVAVLENQNKTLEELKAL  
BAC20140.1 -----SRKRELRLMKNREAAR-ECRRKKKEY-----VKCLENRVAVLENQNKTLEELKAL  
NP\_031523.2 -----QLRREIQLMKNREAAR-ECRRKKKEY-----VKCLENRVAVLENQNKTLEELKTL  
XP\_204339.1 -----QLRREIQLMKNREAAR-ECRRKKKEY-----VKCLKNRVAVLENQNKTLEELKTL  
ATF1\_MOUSE -----QLRREIQLMKNREAAR-ECRRKKKEY-----VKCLENRVAVLENQNKTLEELKTL  
BAB26930.1 -----QLRREIQLMKNREAAR-ECRRKKKEY-----VKCLENRVAVLENQNKTLEELKTL  
CAC15058.1 -----QLKREIQLMKNREAAR-ECRRKKKEY-----VKCLENRV-----  
NP\_005162.1 -----QLKREIQLMKNREAAR-ECRRKKKEY-----VKCLENRVAVLENQNKTLEELKTL  
XP\_235657.1 -----QLKREIQLMKNREAAR-ECRRKKKEY-----VKCLENRVAVLENQNKTLEELKTL  
NP\_956017.1 -----QMKREIRLAKNREAAR-ECRRKKKEY-----VKCLENRVAVLENQNKTLEELKTL  
B37944 -----TRKRELRLMKNREAAR-ECRRKKKEY-----VKCLESRVAVLEVQNKKLIEELETL  
C37944 -----TRKRELRLMKNREAAR-ECRRKKKEY-----VKCLESRVAVLEVQNKKLIEELETL  
JC5602 -----TRKRELRLMKNREAAR-ECRRKKKEY-----VKCLESRVAVLEVQNKKLIEELETL  
JC6135 -----TRKRELRLMKNREAAR-ECRRKKKEY-----VKCLESRVAVLEVQNKKLIEELETL  
BAA03564.1 -----TRKRELRLMKNREAAR-ECRRKKKEY-----VKCLESRVAVLEVQNKKLIEELETL  
BAA03565.1 -----TRKRELRLMKNREAAR-ECRRKKKEY-----VKCLESRVAVLEVQNKKLIEELETL  
CREM\_HUMAN -----TRKRELRLMKNREAAR-ECRRKKKEY-----VKCLESRVAVLEVQNKKLIEELETL  
CREM\_MOUSE -----TRKRELRLMKNREAAR-ECRRKKKEY-----VKCLESRVAVLEVQNKKLIEELETL  
NP\_059030.1 -----TRKRELRLMKNREAAR-ECRRKKKEY-----VKCLESRVAVLEVQNKKLIEELETL  
AAF68682.1 -----TRKRELRLMKNREAAR-ECRRKKKEY-----VKCLESRVAVLEVQNKKLIEELETL  
NP\_874393.1 -----TRKRELRLMKNREAAR-ECRRKKKEY-----VKCLESRVAVLEVQNKKLIEELETL  
NP\_874394.1 -----TRKRELRLMKNREAAR-ECRRKKKEY-----VKCLESRVAVLEVQNKKLIEELETL  
NP\_877570.1 -----TRKRELRLMKNREAAR-ECRRKKKEY-----VKCLESRVAVLEVQNKKLIEELETL  
NP\_877571.1 -----TRKRELRLMKNREAAR-ECRRKKKEY-----VKCLESRVAVLEVQNKKLIEELETL  
NP\_877572.1 -----TRKRELRLMKNREAAR-ECRRKKKEY-----VKCLESRVAVLEVQNKKLIEELETL  
NP\_877573.1 -----TRKRELRLMKNREAAR-ECRRKKKEY-----VKCLESRVAVLEVQNKKLIEELETL  
NP\_898883.1 -----TRKRELRLMKNREAAR-ECRRKKKEY-----VKCLESRVAVLEVQNKKLIEELETL  
AAC60617.2 -----TRKRELRLMKNREAAR-ECRRKKKEY-----VKCLESRVAVLEVQNKKLIEELETL  
NP\_874387.1 -----TRKRELRLMKNREAAR-ECRRKKKEY-----VKCLESRVAVLEVQNKKLIEELETL  
NP\_874388.1 -----TRKRELRLMKNREAAR-ECRRKKKEY-----VKCLESRVAVLEVQNKKLIEELETL  
NP\_853549.1 -----TRKRELRLMKNREAAR-ECRRKKKEY-----VKCLESRVAVLEVQNKKLIEELETL  
S26685 -----TRKRELRLMKNREAAR-ECRRKKKEY-----VKCLESRVAVLEVQNKKLIEELETL  
JC2087 -----TRKRELRLMKNREAAR-ECRRKKKEY-----VKCLENRVAVLEVQNKKLIEELETL  
CREB\_CHLVR -----TRKRELRLYKNREAAR-ECRRKKKEY-----VKCLENRVAVLENQNKALIEELKSL  
NP\_996504.1 -----TRKREIRLQKNREAAR-ECRRKKKEY-----IKCLENRVAVLENQNKALIEELKSL  
NP\_996505.1 -----TRKREIRLQKNREAAR-ECRRKKKEY-----IKCLENRVAVLENQNKALIEELKSL  
AAB35092.1 -----TRKREIRLQKNREAAR-ECRRKKKEY-----IKCLENRVAVLENQNKALIEELKSL  
NP\_996506.1 -----TRKREIRLQKNREAAR-ECRRKKKEY-----IKCLENRVAVLENQNKALIEELKSL  
NP\_996507.1 -----TRKREIRLQKNREAAR-ECRRKKKEY-----IKCLENRVAVLENQNKALIEELKSL  
AAL92477.1 -----SRKREMRLQKNREAAR-ECRRKKKEY-----IKCLENRVAVLENQNKALIEELKSL  
T26807 -----NRKRQVRLMKNREAAR-ECRRKKKEY-----VKCLENRVSVLENQNKALIEELKTL  
T26808 -----NRKRQVRLMKNREAAR-ECRRKKKEY-----VKCLENRVSVLENQNKALIEELKTL  
NP\_499509.2 -----NRKRQVRLMKNREAAR-ECRRKKKEY-----VKCLENRVSVLENQNKALIEELKTL  
NP\_499510.2 -----NRKRQVRLMKNREAAR-ECRRKKKEY-----VKCLENRVSVLENQNKALIEELKTL  
CAD45607.2 -----NRKRQVRLMKNREAAR-ECRRKKKEY-----VKCLENRVSVLENQNKALIEELKTL  
CAD56255.1 -----NRKRQVRLMKNREAAR-ECRRKKKEY-----VKCLENRVSVLENQNKALIEELKTL  
CAB54382.2 -----NRKRQVRLMKNREAAR-ECRRKKKEY-----VKCLENRVSVLENQNKALIEELKTL  
CAE67683.1 -----NRKRQVRLMKNREAAR-ECRRKKKEY-----VKCLENRVSVLENQNKALIEELKTL  
CAD23072.1 -----ARKRELRLMKNREAAR-ECRRKKKEY-----IKCLENRVAVLENQNKTLEELKSL

CAD23073.1 -----ARKRELRLLLKNRQAAR-ECRRKKKEY-----IKCLENRVAILENRNQTLEELKSL  
CAD23074.1 -----ARKRELRLLLKNRQAAR-ECRRKKKEY-----IKCLENRVAILENRNQTLEELKSL  
CAD23075.1 -----ARKRELRLLLKNRQAAR-ECRRKKKEY-----IKCLENRVAILENRNQTLEELKSL  
CAD23076.1 -----ARKRELRLLLKNRQAAR-ECRRKKKEY-----IKCLENRVAILENRNQTLEELKSL  
CAD23077.1 -----ARKRELRLLLKNRQAAR-ECRRKKKEY-----IKCLENRVAILENRNQTLEELKSL  
CAD23078.1 -----ARKRELRLLLKNRQAAR-ECRRKKKEY-----IKCLENRVAILENRNQTLEELKSL  
CAD23079.1 -----ARKRELRLLLKNRQAAR-ECRRKKKEY-----IKCLENRVAILENRNQTLEELKSL  
CAD24865.1 -----ARKRELRLLLKNRQAAR-ECRRKKKEY-----IKCLENRVAILENRNQTLEELKSL  
CAD24866.1 -----ARKRELRLLLKNRQAAR-ECRRKKKEY-----IKCLENRVAILENRNQTLEELKSL  
CAD24867.1 -----ARKRELRLLLKNRQAAR-ECRRKKKEY-----IKCLENRVAILENRNQTLEELKSL  
CAD24868.1 -----ARKRELRLLLKNRQAAR-ECRRKKKEY-----IKCLENRVAILENRNQTLEELKSL  
CAD24869.1 -----ARKRELRLLLKNRQAAR-ECRRKKKEY-----IKCLENRVAILENRNQTLEELKSL  
CAD24870.1 -----ARKRELRLLLKNRQAAR-ECRRKKKEY-----IKCLENRVAILENRNQTLEELKSL  
CAD24871.1 -----ARKRELRLLLKNRQAAR-ECRRKKKEY-----IKCLENRVAILENRNQTLEELKSL  
CAD24872.1 -----ARKRELRLLLKNRQAAR-ECRRKKKEY-----IKCLENRVAILENRNQTLEELKSL  
AAR82739.1 -----SLKKIRRKIKNKISAQ-ESRRKKKEY----MDQLERRVEILVTENHDYKKRLEGL  
NP\_524087.3 -----SLKKIRRKIKNKISAQ-ESRRKKKEY----MDQLERRVEILVTENHDYKKRLEGL  
CRBA\_DROME -----SLKKIRRKIKNKISAQ-ESRRKKKEY----MDQLERRVEILVTENHDYKKRLEGL  
A44494 -----SLKKIRRKIKNKISAQ-ESRRKKKEY----MDQLERRVEILVTENHDYKKRLEGL  
XP\_308098.1 -----SLKKIRRKIKNKISAQ-ESRRKKKEY----MDQLERRVDILVSENLEYRKRVEAL  
AAH14097.1 -----ALKRVRRKIKNKISAQ-ESRRKKKEY----VECLEKKVETFTSENNELWKKVETL  
NP\_443086.1 -----ALKRVRRKIKNKISAQ-ESRRKKKEY----VECLEKKVETFTSENNELWKKVETL  
NP\_036087.1 -----ALKRVRRKIKNKISAQ-ESRRKKKEY----VECLEKKVETYTSENNELWKKVETL  
XP\_342467.1 -----ALKRVRRKIKNKISAQ-ESRRKKKEY----VECLEKKVETYTSENNELWKKVETL  
AAH16447.1 -----ALKRVRRKIKNKISAQ-ESRRKKKEY----VECLEKKVETYTSENNELWKKVETL  
BAC29155.1 -----ALKKIRRKIKNKISAQ-ESRRKKKEY----MDSLEKKVESCSTENLELRKKVEVL  
BAC30798.1 -----ALKKIRRKIKNKISAQ-ESRRKKKEY----MDSLEKKVESCSTENLELRKKVEVL  
AAS49162.1 -----ALKKIRRKIKNKISAQ-ESRRKKKEY----MDSLEKKVESCSTENLELRKKVEVL  
NP\_919047.1 -----ALKKIRRKIKNKISAQ-ESRRKKKEY----MDSLEKKVESCSTENLELRKKVEVL  
XP\_342661.1 -----ALKKIRRKIKNKISAQ-ESRRKKKEY----MDSLEKKVESCSTENLELRKKVEVL  
CAD79343.1 -----ALKKIRRKIKNKISAQ-ESRRKKKEY----MDSLEKKVESCSTENLELRKKVEVL  
CAD79344.1 -----ALKKIRRKIKNKISAQ-ESRRKKKEY----MDSLEKKVESCSTENLELRKKVEVL  
NP\_848776.1 -----ALKKIRRKIKNKISAQ-ESRRKKKEY----MDSLEKKVESCSTENLELRKKVEVL  
NP\_740985.2 -----SLKIVRRKIKNKLSAQ-ESRRKRKEY----IDALEGRLHCFSEENKSLKKQVHQL  
NP\_740986.2 -----SLKIVRRKIKNKLSAQ-ESRRKRKEY----IDALEGRLHCFSEENKSLKKQVHQL  
NP\_740987.2 -----SLKIVRRKIKNKLSAQ-ESRRKRKEY----IDALEGRLHCFSEENKSLKKQVHQL  
T15656 -----SLKIVRRKIKNKLSAQ-ESRRKRKEY----IDALEGRLHCFSEENKSLKKQVHQL  
CAE59060.1 -----SLKIVRRKIKNKLSAQ-ESRRKRKEY----IDALESRLHCFSEENKALKQVHQL  
AAG43527.1 -----ILKRVRRKIRNKRS AQ-ESRRKKKVY----VGGLESRVLYKYTAQNMMELQNKVQLL  
AAH09402.1 -----ILKRVRRKIRNKRS AQ-ESRRKKKVY----VGGLESRVLYKYTAQNMMELQNKVQLL  
AAD09210.1 -----ILKRVRRKIRNKRS AQ-ESRRKKKVY----VGGLESRVLYKYTAQNMMELQNKVQLL  
AAC04325.1 -----ILKRVRRKIRNKRS AQ-ESRRKKKVY----VGGLESRVLYKYTAQNMMELQNKVQLL  
NP\_006359.3 -----ILKRVRRKIRNKRS AQ-ESRRKKKVY----VGGLESRVLYKYTAQNMMELQNKVQLL  
AAB69652.1 -----ILKRVRRKIRNKRS AQ-ESRRKKKVY----VGGLESRVLYKYTAQNMMELQNKVQLL  
NP\_776711.1 -----VLKRVRRKIRNKKS AQ-ESRRKKKVY----VGGLESRVLYKYTAQNLELQNKVQLL  
AAC37645.1 -----VLKRVRRKIRNKRAA Q-ESRKKKKVY----VVGLESRVLYKYTAQNRELQNKVQRL  
BAB25173.1 -----VLKRVRRKIRNKRAA Q-ESRKKKKVY----VVGLESRVLYKYTAQNRELQNKVQRL  
NP\_038525.1 -----VLKRVRRKIRNKRAA Q-ESRKKKKVY----VVGLESRVLYKYTAQNRELQNKVQRL  
XP\_216492.2 -----VLKRVRRKIRNKRAA Q-ESRKKKKVY----VVGLESRVLYKYTAQNQELQNKVQHL  
NP\_663340.1 -----VLKKIRRKIRNKQSA Q-ESRKKKKKEY----IDGLENRMSACTAQNQELQRKVLHL  
XP\_234917.2 -----VLKKIRRKIRNKQSA Q-ESRKKKKKEY----IDGLENRMSACTAQNQELQRKVLHL  
BAC34115.1 -----VLKKIRRKIRNKQSA Q-ESRKKKKKEY----IDGLENLMSACTAQNQELQRKVLHL  
NP\_115996.1 -----VLKKIRRKIRNKQSA Q-ESRKKKKKEY----IDGLETRMSACTAQNQELQRKVLHL  
AAH55664.1 -----TLKRVRRKIRNKQSA Q-ESRKKKKVY----VDGLENRVAVCTAHNQELQKKVEML  
AAO33070.1 -----VLKKVRRKIRNKQSA Q-DSRRRKKEY----IDGLESRVAACSAQNQELQKKVQEL  
NP\_570968.1 -----VLKKVRRKIRNKQSA Q-DSRRRKKEY----IDGLESRVAACSAQNQELQKKVQEL  
BAB24315.1 -----ILKKIRRKIRNKQSA Q-DSRRRKKEY----LDGLESRVAACSEQNQKLQRKVLQEL

NP\_084356.1 -----ILKKIRRKIRNKQSAQ-DSRRRKKEY-----LDGLESRVAACSEQNQKLQRKVQEL  
CAE67216.1 -----DLKRIRRKIRNKRSAQ-TSRKRKQDY-----IEQLEDRVSESTKENQALKQOIQQL  
NP\_491897.1 -----DLKRIRRKIRNKRSAQ-TSRKRKQDY-----IEQLEDRVSESTKENQALKQOIERL  
XP\_321663.1 -----ELKRIRRKIRNKISAQ-DSRKRKKEY-----VDGLEERVKQCTEENQNLVKRIKIL  
AAA97438.1 -----LLKRQQRMIKNRESAC-QSRRKKKEY-----LQGLEARLQAVLADNQQLRRENAAL  
AAB47487.1 -----LLKRQQRMIKNRESAC-QSRRKKKEY-----LQGLEARLQAVLADNQQLRRENAAL  
CAB89295.1 -----LLKRQQRMIKNRESAC-QSRRKKKEY-----LQGLEARLQAVLADNQQLRRENAAL  
CAE83966.1 -----LLKRQQRMIKNRESAC-QSRRKKKEY-----LQGLEARLQAVLADNQQLRRENAAL  
BAA91431.1 -----LLKRQQRMIKNRESAC-QSRRKKKEY-----LQGLEARLQAVLADNQQLRRENAAL  
NP\_004372.3 -----LLKRQQRMIKNRESAC-QSRRKKKEY-----LQGLEARLQAVLADNQQLRRENAAL  
NP\_059102.1 -----LLKRQQRMIKNRESAC-QSRRKKKEY-----LQGLEARLQAVLADNQQLRRENAAL  
CAA66664.1 -----LLKRHERMIKNRESAC-QSRRKKKEY-----LQGLEARLQAVLADNQQLRRENAAL  
BAC29389.1 -----VLRRQQRMIKNRESAC-QSRKKKKEY-----MLGLEARLKAALSENEQLKKENGSL  
XP\_129579.2 -----VLRRQQRMIKNRESAC-QSRKKKKEY-----MLGLEARLKAALSENEQLKKENGSL  
AAH43662.1 -----VLRRQQRMIKNRESAC-QSRKKKKEY-----MLGLEARLKAALSENEQLKKENGSL  
BAA34722.1 -----VLRRQQRMIKNRESAC-QSRKKKKEY-----MLGLEARLKAALSENEQLKKENGTL  
NP\_031374.1 -----VLRRQQRMIKNRESAC-QSRKKKKEY-----MLGLEARLKAALSENEQLKKENGTL  
XP\_222871.2 -----VLRRQQRMIKNRESAC-QSRKKKKEY-----MLGLEARLKAALSENEQLKKENGSL  
F34223 -----VIRRQQRMIKNRESAC-QSRKKKKEY-----MLGLEARLKAALSENEQLKKENGRL  
NP\_610159.1 -----KKYQRMICKNRESAS-LSRKKRKEY-----VVSLETRINKLEKECDSLKAENITL  
NP\_995745.1 -----KKYQRMICKNRESAS-LSRKKRKEY-----VVSLETRINKLEKECDSLKAENITL  
EAA51693.1 -----LTSKERRQLRNKVSAR-AFRSRRKEY-----ITQLESEIANKVTENGDLRTQNRAL  
XP\_381731.1 -----LSSKERRQLRNKVSAR-AFRSRRKEY-----ITQLETEIANKVSENGDLRTQNRAL  
EAA65980.1 -----LSSKERRQLRNKVSAR-AFRSRRKEY-----IGQLENEVAQKTNEAHELRRQNRAL  
EAK87242.1 -----LSSKEKRLRNKISAR-NFRTRRKEY-----IGQLEDQIADRDTLIEGLRQQISQL  
AAO51565.1 -----AKKKKIQMQNRQSAQ-QYRERKKEY-----LKELETIVDNLESDRNQLLQOTKQL  
AAA33489.1 -----EERVRKRKESNRESAR-RSRYRKAHAH-----LKELEDQVAQLKAENSCLLRRIAAL  
CAD36195.1 -----EERVRKRKESNRESAR-RSRYRKAHAH-----LKELEDQVAQLKAENSCLLRRIAAL  
A34800 -----EERVRKRKESNRESAR-RSRYRKAHAH-----LKELEDQVAQLKAENSCLLRRIAAL  
S06022 -----EERVRKRKESNRESAR-RSRYRKAHAH-----LKELEDQVAQLKAENSCLLRRIAAL  
AAO17553.1 -----EERVRKRKESNRESAR-RSRYRKAHAH-----LKELEDQVAQLKAENSCLLRRIAAL  
AAO17558.1 -----EERVRKRKESNRESAR-RSRYRKAHAH-----LKELEDQVAQLKAENSCLLRRIAAL  
AAO17559.1 -----EERVRKRKESNRESAR-RSRYRKAHAH-----LKELEDQVAQLKAENSCLLRRIAAL  
AAO17561.1 -----EERVRKRKESNRESAR-RSRYRKAHAH-----LKELEDQVAQLKAENSCLLRRIAAL  
AAO17556.1 -----EERVRKRKESNRESAR-RSRYRKAHAH-----LKELEDQVAQLKAENSCLLRRIAAL  
AAO17567.1 -----EERVRKRKESNRESAR-RSRYRKAHAH-----LKELEDQVAQLKAENSCLLRRIAAL  
AAO17564.1 -----EERVRKRKESNRESAR-RSRYRKAHAH-----LKELEDQVAQLKAENSCLLRRIAAL  
AAO17566.1 -----EERVRKRKESNRESAG-RSRYRKAHAH-----LKELEDQVAQLKAENSCLLRRIAAL  
AAO17550.1 -----EERVRKRKESNRESAR-RSRYRKAHAH-----LKELEDQVAQLKAENSCLLRRIAAL  
AAO17551.1 -----EERVRKRKESNRESAR-RSRYRKAHAH-----LKELEDQVAQLKAENSCLLRRIAAL  
AAO17554.1 -----EERMRKRKESNRESAR-RSRYRKAHAH-----LKELEDQVAQLKAENSCLLRRIAAL  
AAO17557.1 -----EERMRKRKESNRESAR-RSRYRKAHAH-----LKELEDQVAQLKAENSCLLRRIAAL  
AAO17555.1 -----EERMRKRKESNRESAR-RSRYRKAHAH-----LKELEDQVAQLKAENSCLLRRIAAL  
AAO17562.1 -----EERMRKRKESNRESAR-RSRYRKAHAH-----LKELEDQVAQLKAENSCLLRRIAAL  
AAO17563.1 -----EERMRKRKESNRESAR-RSRYRKAHAH-----LKELEDQVAQLKAENSCLLRRIAAL  
AAO17568.1 -----EERMRKRKESNRESAR-RSRYRKAHAH-----LKELEDQVAQLKAENSCLLRRIASL  
AAO17560.1 -----EERVRKRKESNRKSAR-RSRYRKAHAH-----LKELEDQVAQLKAENSCLLRRIASL  
AAO17569.1 -----EERVRKRKESNRESAR-RSRYRKAHAH-----LKELEDQVAQLKAENSCLLRRIASL  
AAO17552.1 -----HERMRKRKESNRESAR-RSRYRKAHAH-----LKELEDQVAQLKAENSCLLRRIAAL  
S42529 -----EERVRKRKESNRESAR-RSRYRKAHAH-----LKDLEDQVDKKAENSCLSRRLAAL  
S56073 -----EERVRKRKESNRESAR-RSRYRKAHAH-----LKDLEDQVDKKAENSCLLRRLAAL  
S42493 -----EERVRKRKESNRESAR-RSRYRKAHAH-----LKELEDQVEQLKAENSCLLRRLAAL  
AAM53650.1 -----EEKMRKRKESNRESAR-RSRYRKAHAH-----LKEMEDQVAQLKVENSLLRRLATL  
OP2\_MAIZE -----TEERVRK-KESNRESAR-RSRYRKAHAH-----LKELEDQVAQLKAENSCLLRRIAAL  
AAB34363.1 -----EERVRKRKESNRESAR-RSRYRKAHAH-----LKELEDQVAQL-----  
CAD36198.1 -----EERVRKRKESNRESAR-RSRYRKAHAH-----LKELEDQVAQLIKSREFLPAE-----  
AAL10017.1 -----DQRLQRRKQSNRESAR-RSRSRKAHAH-----LNELEAQVSQLRVENSLLRRLADV

AAL77201.1 -----DQRLQRRKQSNRESAR-RSRSRKA AH-----LNELEAQVSQLRVENS SLLRRLADV  
NP\_909959.1 -----DQRLQRRKQSNRESAR-RSRSRKA AH-----LNELEAQVSQLRVENS SLLRRLADV  
T03605 -----DQRLQRRKQSNRESAR-RSRSRKA AH-----LNELEAQVSQLRVENS SLLRRLADV  
BAA36492.1 -----DQRLQRRKQSNRESAR-RSRSRKA AH-----LNELEAQVSQLRVENS SLLRRLADV  
T04477 -----DQRLRRRKQSNRESAR-RSRSRKA AH-----LNELEAQVSQLRVENS SLLRRLADV  
JQ2147 -----QQRLQRRKQSNRESAR-RSRSRKA AH-----LNELEAQVAQLRVENS SLLRRLADV  
JQ2148 -----QQRQRRKQSNRESAR-RSRSRKA AH-----LNELEAQVAQLRVENS SLLRRLADV  
JC5175 -----QHRLQRRKQSNRESAR-RSRSRKA AH-----LNELEAQVSQLRVENS SLLRRLADV  
BAB39173.1 -----EDKVKKRKESNRESAR-RSRSRKA AH-----LKDLEEQV SLLRVENS SLLRRLADA  
CAA71795.1 -----AEKVNKRKESNRDSAR-RSRSRKA AH-----TKELEEQV SLLRVANNSLMRHLADV  
T06767 -----AEKANKRKESNRDSAR-RSRSRKA AH-----AKELEEQV SLLRVANNSLMRHLADV  
AAD21199.1 -----DQRKRKRMI SNRESAR-RSRMRKQKH-----LDDLMAQVSTLRKENDQIL TSMNVT  
AAN61914.1 -----DQRKRKRMI SNRESAR-RSRMRKQKH-----LDDLMAQVSTLRKENDQIL TSMNVT  
AAK92213.1 -----DQRKRKRMI SNRESAR-RSRMRKQKH-----LDDLMAQVATLRKENNQIL TSMNVT  
AAN03468.1 -----DQRKRKRMI SNRESAR-RSRMRKQKH-----LDDLVSQVAQLRKENQIL TSVNIT  
CAA68078.1 -----EQRKRKRMLSNRESAR-RSRMKKQKL-----LDDLTAQVNHLK KENTEIVTSVSIT  
NP\_195185.1 -----EQRKRKRMLSNRESAR-RSRMKKQKL-----LDDLTAQVNHLK KENTEIVTSVSIT  
D96784 -----DERKKRKRKQSNRESAR-RSRMRKQKH-----LDDLTAQVTHLRKENAQIVAGIAVT  
NP\_177672.2 -----DERKKRKRKQSNRESAR-RSRMRKQKH-----LDDLTAQVTHLRKENAQIVAGIAVT  
CAC00658.1 -----DQRKRKRMI SNRESAR-RSRMRKQKH-----LDELMAQAAQLRKENNQI I TTTNLT  
AAG17474.1 -----DERKKRKRMLSNRESAR-RSRVRKQEH-----VDDLTAQINQLSNDNRQIL NSLTVT  
NP\_179408.1 -----DERKKRKRMLSNRESAR-RSRMRKQKH-----VDDLTAQINQLSNDNRQIL NSLTVT  
AAK92214.1 -----DDRKRKRME SNRESAR-RSRMRKQQH-----LEELMSQMTQLQ NQNVLWREKIDAV  
BAB13719.1 -----DDRKRKRME SNRESAR-RSRMRKQQH-----LEELMSQMTQLQ NQNVLWREKIDAV  
AAD55394.1 -----DERKKRKRME SNRESAR-RSRMRKQQH-----LEELMSQMTQLQ NQNVLWREKIDAV  
BAA34938.1 -----DERKKRKRME SNRECAR-RSRMRKQQR-----LGELMGETTQLHK QNSICRERIDSV  
T02016 -----DERKKRKRME SNRESAR-RSRMRKQQR-----LGELMGETTQLHK QNSICRERIDSV  
T17108 -----DERKKRKRKLSNRESAR-RSRMRKQQR-----LDELIAQESQMQEDNK KLRDTIN--  
T17110 -----DERKKRKRKQSNRESAR-RSRMRKQQR-----LDELMAQESQMQEQEENK KLRDIID--  
AAK92215.1 -----DEKKRKRMI SNRESAR-RSRMKKQKL-----LQDLTGEVSR LQVANKNLIKAI EET  
CAC00657.1 -----DEKKRKRMI SNRESAR-RSRMKKQQH-----VDKLI AEMS QLQSQNKVVTQKINE--  
NP\_191801.1 -----DERKKRKRMI SNRESAR-RSRMRKQKQ-----LGDLINEVTLLKNDNAKITEQVDEA  
AAM62538.1 -----DERKKRKRKLSNRESAK-RSREKKQKH-----LEEMSIQLNQLKIQNQELKNQLRYV  
NP\_566925.1 -----DERKKRKRKLSNRESAK-RSREKKQKH-----LEEMSIQLNQLKIQNQELKNQLRYV  
T46042 -----DERKKRKRKLSNRESAK-RSREKKQKH-----LEEMSIQLNQLKIQNQELKNQL---  
NP\_176162.1 -----DDKKRRRTI SNRESAK-RSRMKKKKR-----FEELTEEVRNLNIRNQELKNRLANV  
NP\_179870.1 -----DDRKRKRME SNRESAK-RSRMRKQRH-----IDNLKDEANRLGLENRELANRL---  
NP\_195487.1 -----DERKKRKRME SNRESAK-RSRMRKQSH-----IDNLREQVNRLDLENRELGNRLRLV  
AAR87318.1 -----ERRRQRRKVS NRLSAR-RSRARKQQR-----LEELRGESARLRAENRELAARLHAV  
BAC79506.1 -----RRRRLRRKISNRESAR-RSRARRRQR-----VEELERADELRAERRALASRLDAT  
AAG46064.1 -----DERRLRRKISNRESAR-RSRARKQRH-----LDEL RARAERLRRCNRELAAR----  
BAB59117.1 -----DERKKRKRMLSNRESAR-RSRARKQQR-----LEELIAEAARLQAENARVEAQIGAY  
S35193 -----DERKKRKRMLSNRESAR-RSRARKQQR-----LEELIAEAARLQAENARVEAQIGAY  
S58692 -----DERKKRKRMLSNRESAR-RSRARKQQR-----LEELVAEVARLQAENAA TQARTAAAL  
JQ0984 -----THRREKRRLSNRESAR-RSRLRKQQH-----LDELVQEVARLQADNARVAAR----  
OCS1\_MAIZE -----THRREKRRLSNRESAR-RSRLRKQQH-----LDELVQEVARLQADNARVAARARDI  
CAE92374.1 -----DNRREKRRLSNRESAR-RSRLRKQQH-----LDELVQEVARLQADNARVAARARDI  
NP\_918198.1 -----EERKKRKRKESNRLSAQ-RSRARKQQQ-----LDELAGQVAALRARN GAL-----  
AAK01953.1 -----DERKHRRMISNRESAR-RSRMRKQKH-----LDELWSQVVRLRTENHN LIDKLNHM  
AAK25822.1 -----DERKHRRMISNRESAR-RSRMRKQKH-----LDELWSQVVRLRTENHN LIDKLNHM  
NP\_172817.2 -----DERKQRRMISNRESAR-RSRMRKQRH-----LDELWSQVIRLRTDNHCLMDKLN RV  
NP\_178489.1 -----DERKQRRMISNRESAR-RSRMRKQRH-----LDELWSQVIRLRTDNHCLMDKLN RV  
NP\_189674.1 -----NERKQRRMISNRESAR-RSRMRKQRH-----LDELWSQVMWLRIENHQLLDKLN NL  
NP\_197087.1 -----NERKQRRMVS NRESAR-RSRMRKQRH-----LDELLSQVAWLRS ENHQLLDKLNQV  
AAO22653.1 -----NERKQKRKISNRESAR-RSRMRKQRQ-----VDELWSQVMWL RDNHQLLRKLN CV  
NP\_198696.1 -----NERKQKRKISNRESAR-RSRMRKQRQ-----VDELWSQVMWL RDNHQLLRKLN CV  
NP\_177054.1 -----NERKRRRKVS NRESAR-RSRMRKQRH-----MEELWSMLVQLINKNKSLVDELSQA

BAD09328.1 -----EERRRRRMVSNRESAR-RSRMRKQORQ----LSELWAQVEHLRGNRRLLDDELNRA  
BAD16405.1 -----DERKKRRLVSNRESAR-RSRVRKQORR----LDELSSQVSELRDTNQRLLLEVELNHM  
BAB10103.1 -----EERRARRMVSNRESAR-RSRMRKKKQ----IEELQQQVEQLMMLNHHLSEKVINL  
NP\_200891.1 -----EERRARRMVSNRESAR-RSRMRKKKQ----IEELQQQVEQLMMLNHHLSEKVINL  
NP\_850791.1 -----EEKRLRRMASNRESAR-RTRMRERMM----KEGLQMQVKQLMAYNQFLYNKYISL  
T50499 -----EEKRLRRMASNRESAR-RTRMRERMM----KEGLQMQVKQLMAYNQFLYNKYISL  
NP\_568508.2 -----NVKRVKRMLSNRESAR-RSRRRKQAH----LSELETQVSQLRVENSCLMKGLTDV  
NP\_851088.1 -----NVKRVKRMLSNRESAR-RSRRRKQAH----LSELETQVSQLRVENSCLMKGLTDV  
CAC79656.1 -----NVKRVKRMLSNRESAR-RSRRRKQAH----LSELETQVSQLRVENSCLMKGLTDV  
AAG25729.1 -----NVKRVKRMLSNRESAR-RSRRRKQAH----LSELETQVSQLRVENSCLMKGLTDV  
AAF67360.1 -----NVKRVKRMLSNRESAR-RSRRRKQAH----LSELETQV-----  
AAL27150.1 -----DAKRVRRMLSNRESAR-RSRRRKQAH----LTELETQVSQLRVENSCLLKRLTDI  
T07154 -----DAKRVRRMLSNRESAR-RSRRRKQAH----LTELETQVSQLRVENSCLLKRLTDI  
CPR2\_PETCR -----DAKRVRRMLSNRESAR-RSRRRKQAH----MTELETQVSQLRVENSCLLKRLTDI  
S16321 -----DAKRVRRMLSNRESAR-RSRRRKQAH----MTELETQVSQLRVENSCLLKRLTDI  
CAA04640.1 -----VSNRESAR-RSRKRKQAH----LADLESQVDQLRGENASLFKQLTDA  
T03991 -----DVKRVRRMVSNRESAR-RSRKRKQAH----LADLESQVDQLRGENASLFKQLTDA  
BAB39174.1 -----DVKRVRRMVSNRESAR-RSRKRKQAH----LADLESQVDQLRGENASLFKQLTDA  
CAA04641.1 -----DVKRRRMVSNRESAR-RSRKRKQAH----LADLETQVDQLRGENASLFKQLTDA  
T03990 -----DVKRRRMVSNRESAR-RSRKRKQAH----LADLETQVDQLRGENASLFKQLTDA  
BAB39175.1 -----ETKRIRRMVSNRESAR-RSRRRKQAH----LSELESQVEQLKGENSSLFKQLTES  
CAC79658.1 -----DVKRARRMLSNRESAR-RSRRRKQEQ----MNEFDTQVQQLRAEHSTLINRLSDM  
NP\_567003.2 -----DVKRARRMLSNRESAR-RSRRRKQEQ----MNEFDTQVQQLRAEHSTLINRLSDM  
AAK96836.1 -----DVKRARRMLSNRESAR-RSRRRKQEQ----MNEFDTQAN-----  
NP\_192173.1 -----DVKKSRRMLSNRESAR-RSRRRKQEQ----TSDLETQVNDLKGEHSSLLKQLSNM  
NP\_849290.1 -----DVKKSRRMLSNRESAR-RSRRRKQEQ----TSDLETQVNDLKGEHSSLLKQLSNM  
AAL87327.1 -----DVKKSRRMLSNRESAR-RSRRRKQEQ----TSDLETQVNDLKGEHSSLLKQLSNM  
NP\_568457.1 -----DLKRIRRMVSNRESAR-RSRRRKQEQ----LVDLETQVDSLKGDNSTLYKQL---  
AAF65459.1 -----AMQRQKRMIKNRESAA-RSRERKQAY----IAELESVLTQLEEEENAKMFKEQEEQ  
T04353 -----AMQRQKRMIKNRESAA-RSRERKQAY----IAELESVLTQLEEEENAKMFKEQEEQ  
NP\_915651.1 -----AMQRQKRMIKNRESAA-RSRERKQAY----IAELESVLTQLEEEENAKMFKEQEEQ  
AAO72626.1 -----AMQRQKRMIKNRESAA-RSRERKQAY----IAELEAQVALEEEHAQLLREQEEQ  
AAM63460.1 -----AAQRQRRMIKNRESAA-RSRERKQAY----QVELEALAAKLEEEENELLSKEI EDK  
NP\_199221.1 -----AAQRQRRMIKNRESAA-RSRERKQAY----QVELEALAAKLEEEENELLSKEI EDK  
NP\_171893.1 -----AAQRQKRMIKNRESAA-RSRERKQAY----QVELETAAKLEEEENEQLLKEIEES  
AAK19600.1 -----MERRQRRMIKNRESAA-RSRARRQAY----TVELELELNNL TEENTKLKEIVEEN  
NP\_566870.1 -----MERRQRRMIKNRESAA-RSRARRQAY----TVELELELNNL TEENTKLKEIVEEN  
T48926 -----MERRQRRMIKNRESAA-RSRARRQAY----TVELELELNNL TEENTKLKE-----  
AAM75354.1 -----IERRHRRMIKNRESAA-RSRARKQAY----TVELEAELNHLKEENARLKA E-----  
AAM75355.1 -----IERRHRRMIKNRESAA-RSRARKQAY----TVELEAELNHLKEENARLKA E-----  
G84778 -----VERRQRRMIKNRESAA-RSRARKQAY----TVELEAELNQLKEENAQLKHALAEL  
NP\_565840.1 -----VERRQRRMIKNRESAA-RSRARKQAY----TVELEAELNQLKEENAQLKHALAEL  
T12621 -----VERRQRRMIKNRESAA-RSRARKQAY----TVELEAELNMLKEENAQLKQALAEI  
NP\_915581.1 -----VERRQRRMIKNRESAA-RSRARKQAY----TVELEAELNMLKQENARLKE-----  
AAK19601.1 -----VERRQKRMIKNRESAA-RSRARKQAY----THELEIKVSRLEEENERLRKQ-----  
NP\_191244.1 -----VERRQKRMIKNRESAA-RSRARKQAY----THELEIKVSRLEEENERLRKQ-----  
NP\_565948.1 -----VERRQKRMIKNRESAA-RSRARKQAY----THELEIKVSRLEEENERLRKQ-----  
T02112 -----VERRQKRMIKNRESAA-RSRARKQAY----THELEIKVSRLEEENERLRKQ-----  
CAD12766.1 -----VERRQKRMIKNRESAA-RSRARKQAY----THELEIKVSRLEEENERLRKQ-----  
BAC42739.1 -----VERRQKRMIKNRESAA-RSRARKQAY----THELEIKVSRLEEENERLRKQ-----  
T12622 -----VERRQKRMIKNRESAA-RSRARKQAY----THELENKVSRL EEENERLRRE-----  
NP\_915950.1 -----MERRQKRMIKNRESAA-RSRARKQAY----TNELENKVSRL EEENVRLKRQKE--  
T12585 -----VERRQKRMIKNRESAA-RSRARKQAY----THELENKISRLEEENERLRKQ-----  
BAC79602.1 -----VERRQKRMIKNRESAA-RSRARKQAY----TNELENKISRLEEENERLRRE-----  
BAC65865.1 -----GNRRHKRMIKNRESAA-RSRARKQAY----TNELELEVAHLQAENARLKRQODQL  
BAC65866.1 -----GNRRHKRMIKNRESAA-RSRARKQAY----TNELELEVAHLQAENARLKRQODQL  
BAC65867.1 -----GNRRHKRMIKNRESAA-RSRARKQAY----TNELELEVAHLQAENARLKRQODQL

CAD29860.1 -----GNRRHKRMIKNRESAA-RSRARKQAY-----TNELELEVAHLQAENARLKRQODQL  
CAD29861.1 -----GDRRYKRMICKNRESAA-RSRARKQAY-----TNELELEIAHLQOTENARLKIQQEQQL  
AAK39132.1 -----IERRQRRMIKNRESAA-RSRARKQAY-----TMELEAEVAKLKEENQGLQKKQAEI  
CAB85632.1 -----IERRQRRMIKNRESAA-RSRARKQAY-----TMELEAEVAKLKEKNEELEKKQAEM  
AAL86016.1 -----VERRQRRMIKNRESAA-RSRARKQAY-----TMELEAEVQKLKEQNMELOKKQEEI  
BAD09357.1 -----VERRQRRMIKNRESAA-RSRARKQAY-----TMELEAEVQKLKEQNMELOKKQEEI  
BAA83740.1 -----VERRQRRMIKNRESAA-RSRARKQAY-----TMELEAEVQKLKEQNMELOKKQEEI  
AAS20434.1 -----VERRQRRMIKNRESAA-RSRARKQAY-----TMELEAEVAKLKEENDELQKKQEEM  
NP\_973981.1 -----VERRQRRMIKNRESAA-RSRARKQAY-----TVELEAEVAKLKEENDELQKQARI  
AAO06115.1 -----VERRQRRMIKNRESAA-RSRARKQAY-----TMELEAEVQKLKDLNEELVKKQTEI  
BAB02453.1 -----IERRQRRMIKNRESAA-RSRARKQAY-----TLELEAEIEKLKKTNQELQKK-----  
NP\_566629.1 -----IERRQRRMIKNRESAA-RSRARKQAY-----TLELEAEIEKLKKTNQELQKKQAEM  
NP\_564551.1 -----VERRQKRMICKNRESAA-RSRARKQAY-----TLELEAEIESLKLQDLQKKQAEI  
NP\_567949.1 -----IERRQKRMICKNRESAA-RSRARKQAY-----TMELEAEIAQLKELNEELQKK-----  
NP\_849490.1 -----IERRQKRMICKNRESAA-RSRARKQAY-----TMELEAEIAQLKELNEELQKKQVCL  
BAB61098.1 -----VERRRKRMIKNRESAA-RSRDRKQAY-----TLELETEVAKLKEIKQELQKK-----  
BAC79182.1 -----GDRRKRMIKNRESAA-RSRARKQAR-----VNNLETEVEQLKQENKMLRVKYEQ-----  
NP\_199105.1 -----VDKCLRRIKNRESAA-RSRARKQAR-----TMEVEVELEENLKKDYEELKQHVCL  
AAL79735.1 -----DDRRTIRMMRNRESAL-RSRARKRAY-----VEELEKEVRRLLVDDNLNLKQK-----  
BAD08955.1 -----VERRKRRAMKNRESAE-RSRARKQAY-----LQELEQEVRLLRANAALRHQCHQL  
AAA68429.1 -----ELKRERRKQSNRESAR-RSRLRKQAE-----CEELAQKVSELTAANGTLRSELDQL  
S50821 -----ELKRERRKQSNRESAR-RSRLRKQAE-----CEELAQKVSELTAANGTLRSELDQL  
A38486 -----ELKRERRKQSNRESAR-RSRLRKQAE-----CEELAQKVSELTAANGTLRSELDQL  
BAA02303.2 -----ELKRERRKQSNRESAR-RSRLRKQAE-----CEELAQKVSELTAANGTLRSELDQL  
EMP1\_WHEAT -----ELKRERRKQSNRESAR-RSRLRKQAE-----CEELAQKVSELTAANGTLRSELDQL  
T05716 -----ELKRERRKQSNRESAR-RSRLRKQAE-----CEELAQKVSELTAANGTLRSELDQL  
S50822 -----ELKRERRKQSNRESAR-RSRLRKQAE-----CEELAQKVSELTAANGTLRSELDHL  
BAC83673.1 -----ELKRERRKQSNRESAR-RSRLRKQAE-----CEELARKVAELTTENSALRSELDQL  
BAD11353.1 -----ELKRERRKQSNRESAR-RSRLRKQAE-----CEELARKVAELTTENSALRSELDQL  
CAB62402.1 -----EIKRERRKQSNRESAR-RSRLRKQAE-----CEELARKVAELTTENSALRAELDNL  
CAE53907.1 -----EIKRERRKQSNRESAR-RSRLRKQAE-----CEELSRKVAELTTENNALRTELDQL  
T06512 -----EIKRERRKQSNRESAR-RSRLRKQAE-----CEELSRKVAELTTENNALRTELDQL  
NP\_182150.1 -----ELKRERRKQSNRESAR-RSRLRKQAE-----TEELARKVEALTAENMALRSELNQL  
S20885 -----ELKRERRKQSNRESAR-RSRLRKQAE-----TEELARKVEALTAENMALRSELNQL  
AAA90947.1 -----ELKRERRKQSNRESAR-RSRLRKQAE-----TEELARKVEALTAENMALRSELNQL  
NP\_850449.1 -----ELKRERRKQSNRESAR-RSRLRKQAE-----TEELARKVEALTAENMALRSELNQL  
T07882 -----ELKRERRKQSNRESAR-RSRLRKQAE-----TEELARKVEALTAENMALRSELNQL  
T07887 -----ELKRERRKQSNRESAR-RSRLRKQAE-----TEELARKVEALTAENMALRSELNQL  
T09120 -----ELKRERRKQSNRESAR-RSRLRKQAE-----TEELARRVESLSAENMALKSEVNLL  
AAD42937.1 -----ELKRERRKQSNRESAR-RSRLRKQAE-----TEELAKKVQTLTAENMTLRSEINKL  
NP\_917345.1 -----ESKRERRKQSNRESAR-RSRLRKQAE-----TEELARKVELLTAENTSLRREISRL  
T03373 -----ESKRERRKQSNRESAR-RSRLRKQAE-----TEELARKVELLTAENTSLRREISRL  
T02084 -----ELKREKRKQSNRESAR-RSRLRKQAE-----TEELATQVESLAAENTSLRSEIGRL  
T07150 -----ELKRERRKQSNRESAR-RSRLRKQAE-----TEELARKVEMLTAENVSLKSEITRL  
T07151 -----ELKRERRKQSNRESAR-RSRLRKQAE-----TEELARKVEMLTAENVSLKSEITRL  
T10985 -----ELKRERRKQSNRESAR-RSRLRKQAE-----TEELARKVEMLTAENVSLKSEITQL  
CAA42915.1 -----ELKREKRKQSNRESAR-RSRLRKQAE-----AEELAIRVQSLTAENMTLKSEINKL  
TAF1\_TOBAC -----ELKREKRKQSNRESAR-RSRLRKQAE-----AEELAIRVQSLTAENMTLKSEINKL  
S53020 -----ELKREKRKQSNRESAR-RSRLRKQAE-----AEELAIRVQSLTGENMTLKSEINKL  
S53021 -----EMKREKRKQSNRESAR-RSRLRKQGE-----AEELAIRVQSLTSENGLKSEINNF  
CPR1\_PETCR -----DLKRERRKQSNRESAR-RSRLRKQAE-----AEELAIKVDLSLTAENMALKAEINRL  
S16322 -----DLKRERRKQSNRESAR-RSRLRKQAE-----AEELAIKVDLSLTAENMALKAEINRL  
NP\_192021.1 -----EVKREKRKQSNRESAR-RSRLRKQAE-----TEQLSVKVDALVAENMMLRSLKGLGQL  
T01728 -----EVKREKRKQSNRESAR-RSRLRKQAE-----TEQLSVKVDALVAENMMLRSLKGLGQL  
AAM62869.1 -----EVKREKRKQSNRESAR-RSRLRKQAE-----TEQLSVKVDALVAENMMLRSLKGLGQL  
S66310 -----EVKREKRKQSNRESAR-RSRLRKQAE-----TEELSVKVDALVAENMMLRSLKGLGQL  
T10472 -----EVKREKRKQSNRESAR-RSRLRKQAE-----TEELSVKVDALVAENMMLRSLKGLGQL

T10244 -----EVKKREKRKQSNRESAR-RSRLRKQAE-----TEELSLKVDALVAENMTLRSKLAQL  
A54415 -----EVKKQKRKQSNRESAR-RSRLRKQAE-----WEEVASRADLLKQENSSLKEELKQL  
AAL77202.1 -----ADAWEKRRKQSNRESAR-RSRLRKQAE-----WEEVANRADLLKQENSSLKEELKQL  
NP\_195391.1 -----ELKRQKRKQSNRESAR-RSRLRKQAE-----CEQLQQRVESLSNENQSLRDELQRL  
NP\_849510.1 -----ELKRQKRKQSNRESAR-RSRLRKQAE-----CEQLQQRVESLSNENQSLRDELQRL  
S20883 -----ELKRQKRKQSNRESAR-RSRLRKQAE-----CEQLQQRVESLSNENQSLRDELQRL  
AAB25116.1 -----ELKRQKRKQSNRESAR-RSRLRKQAE-----CEQLQQRVESLSNENQSLRDELQRL  
AAK96765.1 -----ELKRQKRKQSNRESAR-RSRLRKQAE-----CERLQQRVESLSNENQSLRDELQRL  
S51307 -----ELKRQKRKQSNRESAR-RSRLRKQAE-----CEQLQQRVESLTSENQSLRDELQRL  
S66312 -----ELKRQKRKQSNRESAR-RSRLRKQAE-----CEQLQQRVESLTSENQSLRDELQRL  
AAK14790.1 -----ELKRQKRKQSNRESAR-RSRLRKQAE-----CEELQQRVETLSNENRALRDELQRL  
CAC00656.1 -----ELKRQKRKQSNRESAR-RSRLRKQAE-----CEELQQRVETLSNENRALRDELQRL  
S42393 -----ELKRQKRKQSNRESAR-RSRLRKQAE-----CEELQRRVEALSHENHSLKDELQRL  
S42392 -----ELKRQKRKQSNRESAR-RSRLRKQAE-----CEELQHKVETLSNENHGLKEELRKV  
T07148 -----ELKKQKRKQSNRESAR-RSRLRKQAE-----CEELQKRVESLGSSENQTLREELQRV  
T11751 -----ELKRQKRKQSNRESAR-RSRLRKQAE-----CEDLQKRVTLSNENRRTLREELQRL  
CPR3\_PETCR -----ELKRQRRKQSNRESAR-RSRLRKQAE-----SDELQERLDNLSKENRILRKNLQRI  
AAD42938.1 -----ELKRQRRKQSNRESAR-RSRLRKQAE-----CDELAQRAEALKEENNSLRAEVSLI  
AAK39131.1 -----EIKRQRRKQSNRESAR-RSRLRKQAE-----CDELAQRAEALKEENASLRSEVSRI  
T14909 -----ELKRQKRKQSNRESAR-RSRLRKQAE-----CDELAQRAEALKEENASLRAELSRF  
T14911 -----ELKRQRRKQSNRESAR-RSRLRKQAE-----CDELAQRAEVLQEENASLRAELGRA  
AAK39130.1 -----ELKRQRRKQSNRESAR-RSRLRKQAE-----CDELAQRADVLKEENATLRAEVSRI  
T12092 -----ELKRQRRKQSNRESAR-RSRLRKQAE-----CDELAQRADVLSEENASLRAELSRF  
S42394 -----ELKRQRRKQSNRESAR-RSRLRKQAE-----CDELAQRAEVLKEENASLRAELSCL  
AAO06116.1 -----ELKRQKRKQSNRDSAR-RSRLRKQAE-----CEELAQRAEVLKQENASLKDEVSRI  
T03241 -----ELKRQRRKQSNRESAR-RSRLRKQAE-----CEELAQRAEVLKQENTSLRDEVNRI  
BAD07975.1 -----ELKKQKRKQSNRESAR-RSRLRKQAE-----CEELSVRADNLRAENSSLRAELERI  
HBPA\_WHEAT -----ELKKQKRKLSNRESAR-RSRLRKQAE-----CEELGQRAEALKSENSSLRIELDRI  
G84769 -----ELKRQRRKQSNRESAR-RSRLRKQAE-----CDELAQRAEVLNEENTNLRAEINKL  
NP\_850248.2 -----ELKRQRRKQSNRESAR-RSRLRKQAE-----CDELAQRAEVLNEENTNLRAEINKL  
H86445 -----EIKRQRRKQSNRESAR-RSRLRKQAE-----CDELAQRAEVLNGENSSLRAEINKL  
NP\_174494.2 -----EIKRQRRKQSNRESAR-RSRLRKQAE-----CDELAQRAEVLNGENSSLRAEINKL  
AAF79444.1 -----EERRIRRILANRESAR-QTIRRRQAM-----CEELSKKAADLTYENENLRREKDWA  
NP\_173381.1 -----EERRIRRILANRESAR-QTIRRRQAM-----CEELSKKAADLTYENENLRREKDWA  
T03242 -----EAKRLRRVLANRESAR-KTILRRQAI-----RDELARKVADLSSQNETMKKEKDVV  
T03245 -----EAKRLRRVLANRESAR-QTILRRQAI-----RDELARKVADLSTQNESMKKERETV  
AAC04862.1 -----DPKRAKRILANRQSAA-RSKERKTRY-----TSELERKVQTLQTEATTLTSAQITLL  
BAA97100.1 -----DPKRAKRILANRQSAA-RSKERKIRY-----TSELERKVQTLQTEATTLTSAQITVL  
AAL87668.1 -----DPKRAKRILANRQSAA-RSKERKIKY-----TSELERKVQTLQTEATPLTSAQLTLL  
AAO72544.1 -----DPKRAKRILANRQSAA-RSKERKIKY-----TGELERKVQTLQTEATTLTSAQLTLL  
AAM62924.1 -----DPKRAKRIWANRQSAA-RSKERKMRY-----IAELERKVQTLQTEATSLTSAQLTLL  
NP\_172097.1 -----DPKRAKRIWANRQSAA-RSKERKMRY-----IAELERKVQTLQTEATSLTSAQLTLL  
NP\_180695.1 -----DPKRAKRIWANRQSAA-RSKERKTRY-----IFELERKVQTLQTEATTLTSAQLTLL  
T03580 -----DPKRAKRIWANRQSAA-RSKERKMRY-----IAELERKVQTLQTEATTLTSAQLLALL  
CAD41260.1 -----DPKRAKRILANRQSAA-RSKERKMRY-----IAELERKVQTLQTEATTLTSAQLSML  
AAR28765.1 -----DPKRAKRILANRQSAA-RSKERKARY-----ITELERKVQTLQTEATTLTSAQLTLF  
BAC84100.1 -----DPKRAKRILANRQSAA-RSKERKARY-----ITELERKVQTLQTEATTLTSAQLTLF  
NP\_181594.1 -----DPKRAKRILANRQSAA-RSKERKARY-----ILELERKVQTLQTEATTLTSAQLSLF  
T52624 -----DPKRAKRILANRQSAA-RSKERKARY-----ILELERKVQTLQTEATTLTSAQLSLF  
D86203 -----DPKRAKRILANRQSAA-RSKERKARY-----IQELERKVQSLQTEATTLTSAQLTLY  
NP\_172170.1 -----DPKRAKRILANRQSAA-RSKERKARY-----IQELERKVQSLQTEATTLTSAQLTLY  
CAD12036.1 -----DPKRAKRILANRQSAA-RSKERKARY-----IQELERKVQSLQTEATTLTSAQLTLY  
NP\_850168.1 -----DPKRAKRIWANRQSAA-RSKERKTRY-----IFELERKVQTLQTEATTLTSAQLTLL  
AAF37279.4 -----DPKRAKRILANRQSAA-RSKERKIRY-----TGELERKVQTLQNEATTLTSAQVTML  
NP\_564486.1 -----DPKRAKRILANRQSAA-RSKERKIRY-----TGELERKVQTLQNEATTLTSAQVTML  
AAM63070.1 -----DPKRAKRILANRQSAA-RSKERKIRY-----TGELERKVQTLQNEATTLTSAQVTML  
AAL87314.1 -----DPKRVKRILANRQSAA-RSKERKMRY-----IVELEHKVQTLQTEATTLTSAQLTLL

NP\_195601.1 -----RILANRQSAA-RSKERKMRY----IVELEHKVQTLQTEATTLTSAQLTLL  
NP\_849520.1 -----DPKRVKRILANRQSAA-RSKERKMRY----IVELEHKVQTLQTEATTLTSAQLTLL  
BAA76425.1 -----DPKRAKRILANRQSAA-RSKERKMRY----ISELEHKVQTLQTEATTLTSAQLTLL  
NP\_179719.1 -----DPKRVKRILANRVSA-RSKERKTRY----MAELEHKVQTLQTEATTLTSAQLTHL  
NP\_973502.1 -----DPKRVKRILANRVSA-RSKERKTRY----MAELEHKVQTLQTEATTLTSAQLTHL  
NP\_912474.1 -----DPKRVKRVLANRQSAA-RSKERKMRY----IAELEQKVQILQSEATNLNSAQLTMM  
NP\_922490.1 -----DPKRVKRVLANRQSAA-RSKERKMRY----IAELEQKVQILQTEATTLTSAQLTLL  
BAD09726.1 -----DPKRVKRILANRQSAA-RSKERKMRY----IQELEHKVQVQLQTEATTLTSAQLTML  
AAL78371.1 -----DPKRVKRILANRQSAA-RSKERKMRY----IQKLEHKVQVQLQTEASTLSHSLKCL  
CAA05898.1 -----DPKRAKRILANRLSAA-RSKERKTRY----ISELEHKVQKQLQTETTTTLSTQVTTIL  
S52203 -----DPKRAKRILANRLSAA-RSKERKTRY----ISELEHKVQKQLQTETTTTLSTQVTTIL  
CAA52015.1 -----DPKRAKRILANRLSAA-RSKERKTRY----ISELEHKVQKQLQTETTTTLSTQVTTIL  
CAD39525.2 -----DPRRVKRILNRRASAT-KSKEKMKH----VGELQRKQLQVQSETTTTLGAQVTVM  
AAL69473.1 -----DPKRVKRILANRQSAQ-RSRVRKLQY----ISELERSVTSLSQAEVSVLSPRVAFL  
NP\_850369.1 -----DPKRVKRILANRQSAQ-RSRVRKLQY----ISELERSVTSLSQAEVSVLSPRVAFL  
NP\_191371.1 -----DPKRVKRILANRQSAQ-RSRVRKLQY----ISELERSVTSLSQTEVSVLSPRVAFL  
NP\_913295.1 -----DPKRVKRILANRQSAQ-RSRVRKLQY----ISELERSVTSLSQTEVSALSPRVAFL  
NP\_178948.1 -----DPKEVRRILKNRESAA-HLKQKKLQY----MINLEHRINFVENENASIFEKIKLL  
NP\_178956.1 -----DPKEVRRILKNQESAA-RSKQKKLQY----MINLELKNINFLKNNASIFEKIKLL  
NP\_565355.1 -----DPKKVRRILKNRELA-SSKQKRLKY----MIDLEHRIFLENKNALIFEKIKLL  
NP\_850010.1 -----DAKKYKRMLANRASAA-RSKENREKK----IRDMELRVETLENTQASLFGTMTLL  
NP\_199756.1 -----DEKKRKRKLSNRESAR-RSRLKKQKL----MEDTIHEISSLERRIKENSERCRAV  
AAM96961.1 -----DEKKRARLMNRRESAQ-LSRQRKKHY----VEELEEKVRNMHSTITDLNGKISYF  
NP\_565946.1 -----DEKKRARLMNRRESAQ-LSRQRKKHY----VEELEEKVRNMHSTITDLNGKISYF  
T00759 -----DEKKRARLMNRRESAQ-LSRQRKKHY----VEELEEKVRNMHSTITDLNGKISYF  
TGAB\_TOBAC -----DEKKRARLVNRRESAQ-LSRQRKKHY----VEELEDKVRIMHSTIQDLNAKVAYI  
NP\_191225.1 -----EKKKNVRLVNRRESAH-LSRQRKKHY----VEELEDKVKNMHSTISELSSKMSYF  
AAO00862.1 -----DKRKLIRQIRNRESAQ-LSRLRKKQO----TEELERKVKSMNATIAELNGKIAYV  
NP\_187691.1 -----DKRKLIRQIRNRESAQ-LSRLRKKQO----TEELERKVKSMNATIAELNGKIAYV  
NP\_913739.1 -----EAKRRARLVNRRESAH-QSRSRKKQY----VEELEGKVKVMQATIAELGTARISCV  
AAO51139.1 -----ELKKQRRLVKNREYAS-QSRSRKKIY----VENIETKLQKTNQDCASIKSQLNSV  
NP\_174998.1 -----VAKKRRRVRNRDAAV-RSRERKKEY----VQDLEKKSXYLERECLRLGRMLECF  
AAO22523.1 -----ETKRLKRLLRNRVSAQ-QARERKKAY----LGELENRVKDLENRNSELEERLSTL  
NP\_568246.1 -----ENKRLKRLLRNRVSAQ-QARERKKAY----LSELENRVKDLENKNSELEERLSTL  
CAB57979.1 -----ENKRLKRLLRNRVSAQ-QARERKKAY----LIDLEARVKELETKNAELEERLSTL  
T08591 -----ESKRLKRLLRNRVSAQ-QARERKKAY----LIDLETRVKDLEKKNSELKERLSTL  
T08592 -----ESKRLKRLLRNRVSAQ-QARERKKAY----LIDLETRVKDLEKKNSELKERLSTL  
BAC20318.1 -----ESKRLKRLLRNRVSAQ-QARERKKAY----LTDLETQVKDLETNNSSELKERLSTL  
T12093 -----ESKRLKRLLRNRVSAX-QARERKKAY----LSDLETRVNDLEKKNSELKEKLSTL  
BAD15505.1 -----EHKRLKRLLRNRVSAQ-QARERKKAY----LNDLEVKVKDLEKKNSELEERFSTL  
NP\_916476.1 -----EQNRLKRLLRNRVSAQ-QARERKKAY----MTELEAKAKDLELRNAELEQRVSTL  
NP\_850604.1 -----EYRSLKRLLRNRVSAQ-QARERKKVY----VSDLESRANELQNNNDQLEEKISTL  
NP\_850605.1 -----EYRSLKRLLRNRVSAQ-QARERKKVY----VSDLESRANELQNNNDQLEEKISTL  
BAB02051.1 NPVDKEYRSLK-----RVSAQ-QARERKKVY----VSDLESRANELQNNNDQLEEKISTL  
CAC88375.1 -----EQRRIERVLRNRRAAQ-TSRERKRLE----MEKLESEKIDMEQQNQFLLQRLAQM  
EAA66464.1 -----EQRRIERVLRNRRAAQ-TSRERKRLE----MEKLESEKIDMEQQNQFLLQRLAQM  
AAQ73495.1 -----EQRRIERVLRNRRAAQ-TSRERKRLE----MEKLENEKIQMEQQNQFLLQRLSQM  
CAC88374.1 -----EQRRVERVLRNRRAAQ-SSRERKRLE----VEALE-----KRNKELETLLINV  
XP\_329046.1 -----EQRRVERVLRNRRAAQ-SSRERKRLE----VEGLE-----RRNKELE-----  
XP\_391799.1 -----EQRRVERVLRNRRAAQ-SSRERKRQE----VEALE-----KRNQEEEFMAA  
EAA47880.1 -----EQRRVERVLRNRRAAQ-SSRERKRQE----VEALE-----QRNAALEQQLLHF  
EAK84647.1 -----KARLEARQARNLSAQ-YSRERKKAY----VETLEG-----SLNAL  
NP\_034887.1 -----RLKQRRRTLKNRGYAA-SCRIKRVTQ----KEELERQRVELQOEVEKLARENSM  
NP\_663706.1 -----RLKQRRRTLKNRGYAA-SCRIKRVTQ----KEELERQRVELQOEVEKLARENSM  
NP\_002351.1 -----RLKQRRRTLKNRGYAA-SCRIKRVTQ----KEELERQRVELQOEVEKLARENSM  
A49391 -----RLKQRRRTLKNRGYAA-SCRIKRVTQ----KEELERQRVELQOEVEKLARENSM  
AAH60834.1 -----RLKQRRRTLKNRGYAA-SCRIKRVTQ----KEELERQRVELQOEVEKLARENSM

NP\_990087.1 - - - - - RLKQRRRTLKNRGYAA - SCRIVKRVTVQ - - - - - KEELERQQRVELQQEVEKLAARENSSM  
 BAB41097.1 - - - - - QLKQRRRTLKNRGYAA - SCRIVKRVTVQ - - - - - KEELEKQKQKAEELQQEVEKLAENASMS  
 NP\_002350.1 - - - - - QLKQRRRTLKNRGYAA - SCRIVKRVTVQ - - - - - KEELEKQKQKAEELQQEVEKLAENASMS  
 NP\_034886.1 - - - - - QLKQRRRTLKNRGYAA - SCRIVKRVTVQ - - - - - KEELEKQKQKAEELQQEVEKLAENASMS  
 MAFG\_CHICK - - - - - QLKQRRRTLKNRGYAA - SCRIVKRVTVQ - - - - - KEELEKQKQKAEELQQEVEKLAENASMS  
 AAH67680.1 - - - - - QLKQRRRTLKNRGYAA - SCRIVKRVTVQ - - - - - KEELERQKQKAEELQQEVEKLAENASMS  
 NP\_034885.1 - - - - - RLKQRRRTLKNRGYAA - SCRIVKRVTVQ - - - - - KEELQKQKSELEREVDKLAENASMS  
 NP\_036455.1 - - - - - RLKQRRRTLKNRGYAA - SCRIVKRVTVQ - - - - - KEELQKQKSELEREVDKLAENASMS  
 XP\_345858.1 - - - - - RLKQRRRTLKNRGYAA - SCRIVKRVTVQ - - - - - KEELQKQKSELEREVDKLAENASMS  
 AAP36863.1 - - - - - RLKQRRRTLKNRGYAA - SCRIVKRVTVQ - - - - - KEELQKQKSELEREVDKLAENASMS  
 JC7112 - - - - - RLKQRRRTLKNRGYAA - SCRIVKRVTVQ - - - - - KEELQKQKSELEREVDKLAENASMS  
 NP\_990088.1 - - - - - RLKQRRRTLKNRGYAA - SCRIVKRVTVQ - - - - - KEELQKQKMELEWEVDKLAENASMS  
 NP\_956630.1 - - - - - RLKQRRRTLKNRGYAA - SCRIVKRVTVQ - - - - - REALEQQKQKELQQEVEKLAENASMS  
 NP\_611500.1 - - - - - RMKQRRRTLKNRGYAA - SCRIVKRVTVQ - - - - - KDELETEKKSIEWTELEQMHEDNEQV  
 XP\_311544.1 - - - - - RMKQRRRTLKNRGYAA - SCRIVKRVTVQ - - - - - KDELETEKKSIEWTELEQMHEDNEQV  
 A56235 - - - - - RLKQRRRTLKNRGYAA - SCRIVKRVTVQ - - - - - KHHLENEKTQLIQQVEQLKQEVTRL  
 CAA65360.1 - - - - - RLKQRRRTLKNRGYAA - SCRIVKRVTVQ - - - - - KHHLENEKTQLIQQVEQLKQEVTRL  
 NP\_005452.2 - - - - - RLKQRRRTLKNRGYAA - SCRIVKRVTVQ - - - - - KHHLENEKTQLIQQVEQLKQEVTRL  
 NP\_034788.1 - - - - - RLKQRRRTLKNRGYAA - SCRIVKRVTVQ - - - - - KHHLENEKTQLIQQVEQLKQEVTRL  
 NP\_062189.1 - - - - - RLKQRRRTLKNRGYAA - SCRIVKRVTVQ - - - - - KHHLENEKTQLIQQVEQLKQEVTRL  
 AAD30106.1 - - - - - RLKQRRRTLKNRGYAA - SCRIVKRVTVQ - - - - - KHHLENEKTQLIQQVEQLKQEVTRL  
 AAF08316.1 - - - - - RLKQRRRTLKNRGYAA - SCRIVKRVTVQ - - - - - KHNLEGEKTQLVQQVEQLKQEVTRL  
 AAC18821.1 - - - - - RLKQRRRTLKNRGYAA - SCRIVKRVTVQ - - - - - KHHLENEKTQLIQQVEQLKQEVTRL  
 NP\_571090.1 - - - - - RLKQRRRTLKNRGYAA - SCRIVKRVTVQ - - - - - KHHLENEKTQLIQQVEQLKQEVTRL  
 AAH62823.1 - - - - - RLKQRRRTLKNRGYAA - SCRIVKRVTVQ - - - - - KHHLEHEKTSLATQVEQLKQEVTRL  
 NP\_571917.1 - - - - - RLKQRRRTLKNRGYAA - SCRIVKRVTVQ - - - - - KHHLEHEKTSLATQVEQLKQEVTRL  
 AAA42377.1 - - - - - RLKQRRRTLKNRGYAA - SCRIVKRVTVQ - - - - - RHVLESEKNQLLQQVEHLKQEVTRL  
 BAA05935.1 - - - - - RLKQRRRTLKNRGYAA - SCRIVKRVTVQ - - - - - RHVLESEKNQLLQQVEHLKQEVTRL  
 TMAF\_AVIS4 - - - - - RLKQRRRTLKNRGYAA - SCRIVKRVTVQ - - - - - RHVLESEKNQLLQQVEHLKQEVTRL  
 BAA05936.1 - - - - - RLKQRRRTLKNRGYAA - SCRIVKRVTVQ - - - - - RHVLESEKNQLLQQVEHLKQEVTRL  
 BAA05937.1 - - - - - RLKQRRRTLKNRGYAA - SCRIVKRVTVQ - - - - - RHVLESEKNQLLQQVEHLKQEVTRL  
 MAF\_MOUSE - - - - - RLKQRRRTLKNRGYAA - SCRIVKRVTVQ - - - - - RHVLESEKNQLLQQVVDHLKQEVTRL  
 NP\_005351.2 - - - - - RLKQRRRTLKNRGYAA - SCRIVKRVTVQ - - - - - RHVLESEKNQLLQQVVDHLKQEVTRL  
 NP\_062191.1 - - - - - RLKQRRRTLKNRGYAA - SCRIVKRVTVQ - - - - - RHVLESEKNQLLQQVVDHLKQEVTRL  
 AAC27037.1 - - - - - RLKQRRRTLKNRGYAA - SCRIVKRVTVQ - - - - - RHVLESEKNQLLQQVVDHLKQEVTRL  
 AAH65941.1 - - - - - RLKQRRRTLKNRGYAA - SCRIVKRVTVQ - - - - - RHILEGEKTQLIQQVVDHLKQEVTRL  
 BAB21103.2 - - - - - RLKQRRRTLKNRGYAA - SCRIVKRVTVQ - - - - - RHVLEGEKTQLMQQVVDHLKQEVTRL  
 AAC60377.1 - - - - - RLKQRRRTLKNRGYAA - SCRIVKRVTVQ - - - - - RHILENEKCCQLSQVVEQLKQEVTRL  
 AAF71239.1 - - - - - RLKQRRRTLKNRGYAA - SCRIVKRVTVQ - - - - - RHILENEKCCQLSQVVEQLKQEVTRL  
 AAN75524.1 - - - - - RLKQRRRTLKNRGYAA - SCRIVKRVTVQ - - - - - RHILENEKCCQLSQVVEQLKQEVTRL  
 NP\_990356.1 - - - - - RLKQRRRTLKNRGYAA - SCRIVKRVTVQ - - - - - RHILENEKCCQLSQVVEQLKQEVTRL  
 NP\_919331.1 - - - - - RLKQRRRTLKNRGYAA - SCRIVKRVTVQ - - - - - RHILESEKCCQLSQVVEQLKQEVTRL  
 XP\_345847.1 - - - - - RLKQRRRTLKNRGYAA - SCRIVKRVTVQ - - - - - RHILESEKCCQLSQVVEQLKQEVTRL  
 NP\_963883.1 - - - - - RLKQRRRTLKNRGYAA - SCRIVKRVTVQ - - - - - RHILESEKCCQLSQVVEQLKQEVTRL  
 BAB21104.2 - - - - - RLKQRRRTLKNRGYAA - SCRIVKRVTVQ - - - - - RHMLESEKCTLQSQVVEQLKQEVTRL  
 JC7572 - - - - - RLKQRRRTLKNRGYAA - SCRIVKRVTVQ - - - - - RHMLESEKCTLQSQVVEQLKQEVTRL  
 AAF08317.2 - - - - - RLKQRRRTLKNRGYAA - SCRIVKRVTVQ - - - - - RHVLETEKCHLSRQLQQLQEVTRL  
 NP\_006168.1 - - - - - RLKQRRRTLKNRGYAA - SCRIVKRVTVQ - - - - - RRGLEAERARLAAQLDALRAEVARL  
 XP\_224189.1 - - - - - RLKQRRRTLKNRGYAA - SCRIVKRVTVQ - - - - - RRGLEAERARLAAQLDALRAEVARL  
 NP\_032762.1 - - - - - RLKQRRRTLKNRGYAA - SCRIVKRVTVQ - - - - - RRGLEAERARLAAQLDALRAEVARL  
 AAP36333.1 - - - - - RLKQRRRTLKNRGYAA - SCRIVKRVTVQ - - - - - RRGLEAERARLAAQLDALRAEVARL  
 BAC31838.1 - - - - - RLKQRRRTLKNRGYAA - SCRIVKRVTVQ - - - - - RRGLEAERARLAAQLDALRAEVARL  
 AAQ72813.1 - - - - - TRPRRTLKNRGYAA - SCRIVKRVTVQ - - - - - RHLLEIEKQHLQRELDLQKLNLRDT  
 XP\_319177.1 - - - - - RLKQRRRTLKNRGYAA - SCRIVKRVTVQ - - - - - RHDLEITNRHLHHEMQQMKMELAKI  
 EAA50999.1 - - - - - ELKQKRLRLNRQAAL - DSRQKQKH - - - - - TEQLEVEKHYTNIINLEEELEDL  
 EAA64243.1 - - - - - ELKQKRLRLNRQAAL - DSRQKQKH - - - - - TEKLEEEKHYTNIINLEEELEDLQNM  
 XP\_324679.1 - - - - - ELKQKRLRLNRQAAL - DSRQKQKH - - - - - TERLEDEKHYTNIINMEEQMNAL

XP\_380691.1 -----ELKQQKRLLRNRQAAL-DSRQRKKQH-----TERLEDEKKQYTAVINDMEEEMAEL  
A84544 -----ESSGKKRPLGNREAVR-KYREKKKAK-----AASLEDEVMRLKAVNNQLLKRLQ--  
NP\_179268.2 -----ESSGKKRPLGNREAVR-KYREKKKAK-----AASLEDEVMRLKAVNNQLLKRLQ--  
NP\_567974.1 -----GKKGEKRPLGNREAVR-KYREKKKAK-----AASLEDEVARLRVAVNQQLVKRLQONQ  
T05774 -----GKKGEKRPLGNREAVR-KYREKKKAK-----AASLEDEVARLRVAVNQQLVKRLQONQ  
AAM63358.1 -----GKKGEKRPLGNREAVR-KYREKKKAK-----AASLEDEVARLRALNQQLVKRLQONQ  
NP\_190764.2 -----DSSNKKRLCGNREAVR-KYREKKKAK-----TAYLEDEVMRLOSLNEQFLRKLQSQ  
NP\_850680.1 -----DSSNKKRLCGNREAVR-KYREKKKAK-----TAYLEDEVMRLOSLNEQFLRKLQSQ  
T49075 -----DSSNKKRLCGNREAVR-KYREKKKAK-----TAYLEDEVMRLOSLNEQFLRKLQSQ  
NP\_915829.1 -----ELRKTRKPLGNREAVR-KYREKKKAH-----AAFLEEEVKKLRTTNQQLLRRLQ--  
AAP06202.1 -----ELRNRRRRLQNRRYAR-KCASKKQSEVEKLATEVEVEEVEIQALRSQLSRTNLAT  
AAB31250.2 -----IEKVLRRRLAQNREAAAR-KSRLRKKAY-----VQOLENSKLLIQLEQEL-----  
T07033 -----IEKVLRRRLAQNREAAAR-KSRLRKKAY-----VQOLENSKLLIQLEQEL-----  
TGAA\_TOBAC -----VEKVLRRRLAQNREAAAR-KSRLRKKAY-----VQOLENSKLLIQLEQELER-----  
AAB31251.2 -----IDKVRRLRLAQNREAAAR-KSRLRKKAY-----VQOLENSKLLIQLEQELER-----  
S49583 -----IDKVRRLRLAQNREAAAR-KSRLRKKAY-----VQOLENSKLLIQLEQELER-----  
AAK71287.1 -----IDKVRRLRLAQNREAAAR-KSRLRKKAY-----VQOLENSKLLIQLEQELER-----  
S17715 -----IDKVLRRRLAQNREAAAR-KSRLRKKAY-----VQOLENSKLLIQLEQELER-----  
AAK84888.1 -----TDKIQRRLAQNREAAAR-KSRLRKKAY-----VQOLESSRLKLMQLEQELER-----  
T08813 -----TDKIQRRLAQNREAAAR-KSRLRKKAY-----VQOLESSRLKLMQLEQELER-----  
JQ1678 -----PDKIQRRLAQNREAAAR-KSRLRKKAY-----VQOLETSRLKLIQLEQEL-----  
NP\_201324.1 -----PDKIQRRLAQNREAAAR-KSRLRKKAY-----VQOLETSRLKLIQLEQEL-----  
AAM64610.1 -----PDKIQRRLAQNREAAAR-KSRLRKKAY-----VQOLETSRLKLIQLEQEL-----  
NP\_196565.1 -----PDKIQRRLAQNREAAAR-KSRLRKKAY-----VQOLETSRLKLIHLEQEL-----  
S48121 -----PDKIQRRLAQNREAAAR-KSRLRKKAY-----VQOLETSRLKLIHLEQEL-----  
CAD41728.3 -----PDKVLRRRLAQNREAAAR-KSRLRKKAY-----IQOLETSRLKLAQLEQELQR-----  
AAF17682.1 -----HDKMKRRLAQNREAAAR-KSRLRKKAY-----VQOLEESRLKLSQLEQELEK-----  
NP\_565162.1 -----HDKMKRRLAQNREAAAR-KSRLRKKAY-----VQOLEESRLKLSQLEQELEK-----  
AAM64781.1 -----NDKMKRRLAQNREAAAR-KSRLRKKAH-----VQOLEESRLKLSQLEQEL-----  
NP\_564156.1 -----NDKMKRRLAQNREAAAR-KSRLRKKAH-----VQOLEESRLKLSQLEQEL-----  
AAK84889.1 -----DQKTLRRLAQNREAAAR-KSRLRKKAY-----VQOLESSRLKLTQLEQELQR-----  
AAK84890.1 -----DQKTLRRLAQNREAAAR-KSRLRKKAY-----VQOLESSRLKLTQLEQELQR-----  
JC1230 -----DQKTLRRLAQNREAAAR-KSRLRKKAY-----VQOLESSRLKLTQLEQELQR-----  
AAF06696.1 -----DQKTLRRLAQNREAAAR-KSRLRKKAY-----VQOLESSRMKLTQLEQELQR-----  
BAA06486.1 -----DQKTMRRLAQNREAAAR-KSRLRKKAY-----VQOLENSRLKLTQLEQELQR-----  
HBPB\_WHEAT -----DQKTMRRLAQNREAAAR-KSRLRKKAY-----VQOLENSRLKLTQLEQELQR-----  
NP\_974293.1 -----DQKTLRRLAQNREAAAR-KSRLRKKAY-----VQOLENSRLKLTQLEQELQR-----  
S48122 -----DQKTLRRLAQNREAAAR-KSRLRKKAY-----VQOLENSRLKLTQLEQELQR-----  
NP\_566415.3 -----DQKTLRRLAQNREAAAR-KSRLRKKAY-----VQOLENSRLKLTQLEQELQR-----  
NP\_196312.1 -----DQKTLRRLAQNREAAAR-KSRLRKKAY-----VQOLENSRLKLTQLEQELQR-----  
NP\_196313.1 -----DQKTLRRLAQNREAAAR-KSRLRKKAY-----VQOLENSRLKLTQLEQELQR-----  
BAB03134.1 -----DQKTLRRLAQNREAAAR-KSRLRKKAY-----VQOLENSRLKLTQLEQELQR-----  
BAB72063.1 -----DQKTLRRLAQNREAAAR-KSRLRKKAY-----VQOLENSRLKLTQLEQELQR-----  
AAC37470.1 -----DQKTLRRLAQNREAAAR-KSRLRKKAY-----VQOLEDSRLKLTQVEQEELQR-----  
TG21\_TOBAC -----DQKTLRRLAQNREAAAR-KSRLRKKAY-----VQOLENSRLKLSQLEQDLQR-----  
AAF22906.1 -----DAKTLRRLAQNREAAAR-KSRLRKKAY-----VQOLESSRIKLSQLEQEELQR-----  
NP\_563810.2 -----DAKTLRRLAQNREAAAR-KSRLRKKAY-----VQOLESSRIKLSQLEQEELQR-----  
BAB11142.1 -----DPKTLRRLAQNREAAAR-KSRLRKKAY-----VQOLESCRIKLTQLEQEIQR-----  
NP\_850784.1 -----DPKTLRRLAQNREAAAR-KSRLRKKAY-----VQOLESCRIKLTQLEQEIQR-----  
CAC40649.1 -----DPKTLRRLAQNREAAAR-KSRLRKKAY-----VQOLESCRIKLTQLEQEIQR-----  
BAB72064.1 -----DHKTLRRLAQNREAAAR-KSRLRKKAY-----IQNLESSRLKLTQIEQEELQR-----  
NP\_915902.1 -----DHKTLRRLAQNREAAAR-KSRLRKKAY-----IQNLESSRLKLTQIEQEELQR-----  
HBB2\_WHEAT -----DHKSLRRLAQNREAAAR-KSRLRKKAY-----IQNLESSRLKLTQLEQEELQR-----  
S33222 -----DQKTLRRLAQNREAAAR-KSRLRKKAY-----IQNLESSRLKLTQLEQEELQR-----  
S33223 -----DQKTLRRLAQNREAAAR-KSRLRKKAY-----IQNLESSRLKLTQLEQEELHQ-----  
BAB72062.1 -----DQKTIRRLAQNREAAAR-KSRLRKKAY-----VQOLESSKLLKLAQLEQEELQK-----  
NP\_910392.1 -----DQKTIRRLAQNREAAAR-KSRLRKKAY-----VQOLESSKLLKLAQLEQEELQK-----

BAB72061.1 -----DQKVLRRRLAQNREAAR-KSRLRKKAY----VQQLSSKLLKSLASLEQEINK-----  
BAD03039.1 -----RDKIQRRLAQNREAAR-KSRLRKKAY----IQNLETSRMKLAHLEQEI-----  
AAD19660.1 -----DQRTLRRRLAQNREAAR-KSRLRKKAY----VQQLNSRIRLAQLEEEELKR-----  
NP\_177031.1 -----DQRTLRRRLAQNREAAR-KSRLRKKAY----VQQLNSRIRLAQLEEEELKR-----  
AAO45628.1 -----DAKTERRLAQNREAAR-KSRLRKKAY----VQQLLETTRIRLQ-----  
T01415 -----DAKTERRLAQNREAAR-KSRLRKKAY----VQQLETSRIQLQVEHELQR-----  
AAA87944.1 -----QGRTRKRKQSGQCAAR-AGKQRMKEK----EQENERKVAQLAEENERLKLKLEIERL  
NP\_077048.1 -----QGRTRKRKQSGQCAAR-AGKQRLKEK----EQENERKVAQLAEENERLNKEIERL  
AAB27103.1 -----QGRTRKRKQSGHSPAR-AGKQRMKEK----EQENERKVAQLAEENERLKLKQEIERYL  
CAA63088.1 -----QGRTRKRKQSGHSPAR-AGKQRMKEK----EQENERKVAQLAEENERLKLKQEIERYL  
JC1169 -----QGRTRKRKQSGHSPAR-AGKQRMKEK----EQENERKVAQLAEENERLKLKQEIERYL  
NP\_004074.2 -----QGRTRKRKQSGHSPAR-AGKQRMKEK----EQENERKVAQLAEENERLKLKQEIERYL  
AAP36688.1 -----QGRTRKRKQSGHSPAR-AGKQRMKEK----EQENERKVAQLAEENERLKLKQEIERYL  
GA15\_MOUSE -----QGRTRKRKQSGQCPAR-PGKQRMKEK----EQENERKVAQLAEENERLKLKQEIERYL  
NP\_031863.2 -----QGRTRKRKQSGQCPAR-PGKQRMKEK----EQENERKVAQLAEENERLKLKQEIERYL  
GA15\_CRILO -----RKRKQSGQCPARGTGKQRMKEK----EQENERKVAQLAEENERLKLKQEIERYL  
AAR97288.1 -----DKSKNKSRSQNIASRNYRQRKKDH----ISEVEFKVQQLSLENERLKLQENHLL  
CAE57240.1 -----QRKIRNRMYAQ-ASRIRKREA----EEMKRTIEELTTENDILRNENTIL  
NP\_510094.1 -----QNRKIRNRMYAQ-ASRMRKKEA----DEHMKMNLQELLQENEILRTENAAL  
EAA38700.1 -----DLDTDKRKENGRLAAK-RYRERVKED----QILLKEDLQKLREDNLRLEENAAL  
JC7300 -----EEKALRRKLNKRVAAQ-TARDRKKAR----MSELEQQVVDLEENHKLQLENQLL  
NP\_038870.2 -----EEKALRRKLNKRVAAQ-TARDRKKAR----MSELEQQVVDLEENHKLQLENQLL  
AAH08153.1 -----EEKALRRKLNKRVAAQ-TARDRKKAR----MSELEQQVVDLEENHKLQLENQLL  
AAL60202.1 -----EEKALRRKLNKRVAAQ-TARDRKKAR----MSELEQQVVDLEENHKLQLENQLL  
BAB82982.1 -----EEKALRRKLNKRVAAQ-TARDRKKAR----MSELEQQVVDLEENHKLQLENQLL  
XBP1\_HUMAN -----EEKALRRKLNKRVAAQ-TARDRKKAR----MSELEQQVVDLEENHKLQLENQLL  
AAH15709.1 -----EEKALRRKLNKRVAAQ-TARDRKKAR----MSELEQQVVDLEENHKLQLENQLL  
NP\_005071.2 -----EEKALRRKLNKRVAAQ-TARDRKKAR----MSELEQQVVDLEENHKLQLENQLL  
XP\_214067.1 -----EEKALRRKLNKRVAAQ-TARDRKKAR----MSELEQQVVDLEENHKLQLENQLL  
AAH43852.1 -----EEKALRRKLNKRVAAQ-TARDRKKAR----MSELEQQVIDLEMENEKLLIENQIL  
AAK48906.1 -----EEKALRRKLNKRVAAQ-TARDRKKAR----MSELEQQVIDLEMENEKLLIENQIL  
AAH67321.1 -----EEKALRRKLNKRVAAQ-TARDRKKAR----MSELEQQVVDLEMENEKLLIENQIL  
AAL05527.1 -----EEKALRRKLNKRVAAQ-TARDRKKAK----MGELEQQVLELELENQKLHVENRLL  
AAL69332.1 -----EEKALRRKLNKRVAAQ-TARDRKKAK----MGELEQQVLELELENQKLHVENRLL  
NP\_571949.1 -----EEKALRRKLNKRVAAQ-TARDRKKAK----MGELEQQVLELELENQKLHVENRLL  
AAL75953.1 -----EEKALRRKLNKRVAAQ-TARDRKKAK----MGELEQQVLELELENQKLHVENRLL  
NP\_524722.2 -----EEKVQRKKLKLNKRVAAQ-TSRDRKKAR----MEEMDYEIKELTDRTEILQNKCDL  
NP\_726032.2 -----EEKVQRKKLKLNKRVAAQ-TSRDRKKAR----MEEMDYEIKELTDRTEILQNKCDL  
XP\_310116.1 -----EEKIQRKKLKLNKRVAAQ-TSRDRKKAK----MEEMEKTIQEQSEQIEQLQNRCSAL  
NP\_871653.1 -----EEKMDRRKLNKRVAAQ-NARDKKKER----SAKIEDVMRDLVEENRRLRAENERL  
T24253 -----EEKMDRRKLNKRVAAQ-NARDKKKER----SAKIEDVMRDLVEENRRLRAENERL  
NP\_497840.2 -----EEKMDRRKLNKRVAAQ-NARDKKKER----SAKIEDVMRDLVEENRRLRAENERL  
CAE72866.1 -----EEKMDRRKFNKRVAAQ-NARDKKKER----SGKIDEVMRKLVEENRRLRAENEKL  
A44083 -----KQKLERRRKRNRDAAR-RRRRKQTDY----VDKLHEACEELQRANEHLRKEIRDL  
NP\_057830.1 -----KQKLERRRKRNRDAAR-RRRRKQTDY----VDKLHEACEELQRANEHLRKEIRDL  
AAG14255.1 -----KQKLERRRKRNRDAAR-RRRRKQTDY----VDKLHEACEELQRANEHLRKEIRDL  
AAS78588.1 -----KQKLERRRKRNRDAAR-RRRRKQTDY----VDKLHEACEELQRANEHLRKEIRDL  
AAR13326.1 -----KQKLERRRKRNRDAAR-RRRRKQTDY----VDKLHEACEELQRANEHLRKEIRDL  
AAR13328.1 -----KQKLERRRKRNRDAAR-RRRRKQTDY----VDKLHEACEELQRANEHLRKEIRDL  
AAR13330.1 -----KQKLERRRKRNRDAAR-RRRRKQTDY----VDKLHEACEELQRANEHLRKEIRDL  
AAR13331.1 -----KQKLERRRKRNRDAAR-RRRRKQTDY----VDKLHEACEELQRANEHLRKEIRDL  
BAA93716.1 -----KQKLERRRKRNRDSAR-RRRRKQTDY----VDKLHEACEELQRANEHLHKEIRDL  
BAC02923.1 -----KQKLERRRKRNRDSAR-RRRRKQTDY----VDKLHEACEELQRANEHLHKEIRDL  
BAC02924.1 -----KQKLERRRKRNRDSAR-RRRRKQTDY----VDKLHEACEELQRANEHLHKEIRDL  
AAC54628.1 -----KQKLERRRKRNRDASR-RRRRKQTDY----VDKLHEACEELQRANEHLRKEIRDL  
BAC57989.1 -----KQKLERRRKRNRDASR-RRRRKQTDY----VDKLHEACEELQRANEHLRKEIRDL  
AAP06937.1 -----KQKLERRRKRNRDASR-RRRRKQTDY----VDKLHEACEELRRANEHLRKEIRDL

AAG29915.1 - - - - -KQKLERRRKRNRDASR - RRRREQTDY - - - - -VDKLHEACEELQRANEHLRKEIRDL  
AAM00002.1 - - - - -KQKLERRRKRNRDASR - RRRREQTDY - - - - -VDKLHEACEELQRANEHLRKEIRDL  
AAR13320.1 - - - - -KQKLERRRKRNRDASR - RRRREQTDY - - - - -VDKLHEACEELQRANEHLRKEIRDL  
AAP06939.1 - - - - -KQKLERRRKRNRDASR - RRRREQTDY - - - - -VDKLHEACEELQRANEHLRKEIRDL  
AAP06940.1 - - - - -KQKLERRRKRNRDASR - RRRREQTDY - - - - -VDKLHEACEELQRANEHLRKEIRDL  
AAP06941.1 - - - - -KQKLERRRKRNRDASR - RRRREQTDY - - - - -VDKLHEACEELQRANEHLRKEIRDL  
AAP06942.1 - - - - -KQKLERRRKRNRDASR - RRRREQTDY - - - - -VDKLHEACEELQRANEHLRKEIRDL  
AAP06943.1 - - - - -KQKLERRRKRNRDASR - RRRREQTDY - - - - -VDKLHEACEELQRANEHLRKEIRDL  
AAP06944.1 - - - - -KQKLERRRKRNRDASR - RRRREQTDY - - - - -VDKLHEACEELQRANEHLRKEIRDL  
AAL99997.1 - - - - -KQKLERRRKRNRDASR - RRRREQTDY - - - - -VDKLHEACEELQRANEHLRKEIRDL  
AAM00005.1 - - - - -KQKLERRRKRNRDASR - RRRREQTDY - - - - -VDKLHEACEELQRANEHLRKEIRDL  
AAG27971.1 - - - - -KQKLERRRKRNRDAAR - RRRREQTY - - - - -VDKLHEACEELQRANEHLRKEIRDL  
BAC57991.1 - - - - -KQKLERRRKRNRDAAR - RRRREQTDY - - - - -VDKLHEACEELQRANEHLRKEIRDL  
AAL99996.1 - - - - -KQKLERRRKRNRDAAR - RRRREQTY - - - - -VDKLHEACEELQRANEHLRKEIRDL  
AAR13322.1 - - - - -KQKLERRRKRNRDAAR - RRRREQTY - - - - -VDKLHEACEELQRANEHLRKEIRDL  
AAL99998.1 - - - - -KQKLERRRKRNRDAAR - RRRREQTY - - - - -VDKLHEACEELQRANEHLRKEIRDL  
AAL99999.1 - - - - -KQKLERRRKRNRDAAR - RRRREQTY - - - - -VDKLHEACEELQRANEHLRKEIRDL  
AAM00001.1 - - - - -KQKLERRRKRNRDAAR - RRRREQTY - - - - -VDKLHEACEELQRANEHLRKEIRDL  
AAM00003.1 - - - - -KQKLERRRKRNRDAAR - RRRREQTY - - - - -VDKLHEACEELQRANEHLRKEIRDL  
AAM00004.1 - - - - -KQKLERRRKRNRDAAR - RRRREQTY - - - - -VDKLHEACEELQRANEHLRKEIRDL  
AAR13321.1 - - - - -KQKLERRRKRNRDAAR - RRRREQTY - - - - -VDKLHEACEELQRANEHLRKEIRDL  
AAR13324.1 - - - - -KQKLERRRKRNRDAAR - RRRREQTY - - - - -VDKLHEACEELQRANEHLRKEIRDL  
AAS78589.1 - - - - -KQKLERRRKRNRDAAR - RRRREQTY - - - - -VDKLHETCEELRRANEHLRREIRDL  
AAP06945.1 - - - - -KQKLERRRKRNRDAAR - RRRRQTDY - - - - -VDKLHEACEELQRANEHLRISLES  
AAP06946.1 - - - - -KQKLERRRKRNRDAAR - RRRRQTDY - - - - -VDKLHEACEELQRANEHLRISLES  
AAC54629.1 - - - - -KQKLERRRKRNRDASR - RRRRAQTDY - - - - -VDKLHEACEELQRANEHLRISLES  
BAB32053.1 - - - - -DDRKVRREKKNRVAQAQ - RSRKKQTQK - - - - -ADKLHEEHESLEQENSVLRRREISKL  
NP\_068637.1 - - - - -DDRKVRREKKNRVAQAQ - RSRKKQTQK - - - - -SDKLHEEHESLEQENSVLRRREIAKL  
NP\_061134.1 - - - - -DDRKVRREKKNRVAQAQ - RSRKKQTQK - - - - -ADKLHEEYESLEQENTMLRREIGKL  
XP\_355268.1 - - - - -DDRKVRREKKNRVAQAQ - RSRKKQTQK - - - - -ADKLHE - - - - -  
NP\_006390.1 - - - - -DVRVQRREKKNRVAQAQ - KSRQRQTQK - - - - -ADTLHLESEDLEKQNAALRKEIKQL  
NP\_058047.1 - - - - -DVRVQRREKKNRVAQAQ - KSRQRQTQK - - - - -ADTLHLESEDLEKQNAALRKEIKQL  
NP\_083243.1 - - - - -SQKQLKKKQKNRVAQAQ - RSRQKHTSK - - - - -ADALHQHESLEKQNHALRKEIQAL  
NP\_612465.3 - - - - -EQQRQLKK - QKNRAAQAQ - RSRQKHTDK - - - - -ADALHQHESLEKQNDLALRKEIQSL  
AAA53043.1 - - - - -LDKCLKKMEQNKTAAT - RYRQKKRAE - - - - -QEALTGECKELEKKNEALKEKADSL  
XP\_139474.1 - - - - -LDKCLKKMEQNKTAAT - RYRQKKRAE - - - - -QEALTGECKELEKKNEALKEKADSL  
ATF4\_MOUSE - - - - -LDKCLKKMEQNKTAAT - RYRQKKRAE - - - - -QEALTGECKELEKKNEALKEKADSL  
BAA25314.1 - - - - -LDKCLKKMEQNKTAAT - RYRQKKRAE - - - - -QEALTGECKELEKKNEALKEKADSL  
BAC25014.1 - - - - -LDKCLKKMEQNKTAAT - RYRQKKRAE - - - - -QEALTGECKELEKKNEALKEKADSL  
NP\_033846.1 - - - - -LDKCLKKMEQNKTAAT - RYRQKKRAE - - - - -QEALTGECKELEKKNEALKEKADSL  
NP\_077379.1 - - - - -LDKCLKKMEQNKTAAT - RYRQKKRAE - - - - -QEALTGECKELEKKNEALKEKADSL  
AAP36818.1 - - - - -LDKCLKKMEQNKTAAT - RYRQKKRAE - - - - -QEALTGECKELEKKNEALKERADSL  
ATF4\_HUMAN - - - - -LDKCLKKMEQNKTAAT - RYRQKKRAE - - - - -QEALTGECKELEKKNEALKERADSL  
NP\_877962.1 - - - - -LDKCLKKMEQNKTAAT - RYRQKKRAE - - - - -QEALTGECKELEKKNEALKERADSL  
XP\_290732.2 - - - - -LDKCLKKMEQNKTAAT - RYRQKKRAE - - - - -QEALTGECKELEKKNEALKERADSL  
1CI6A - - - - -MKKCLKKMEQNKTAAT - RYRQKKRAE - - - - -QEALTGECKELEKKNEALKERADSL  
NP\_990211.1 - - - - -IDKCLKKMEQNKTAAT - RYRQKKRAE - - - - -QEALSGECDLEKQNKQALKEKADSL  
AAH59971.1 - - - - -VDKCKKMEQNKTAAT - RYRQKKRAE - - - - -QEALSGECDLEKQNKQALKEKADSL  
AAH67714.1 - - - - -VEKCLKKMEQNKTAAT - RYRQKKRVE - - - - -QESLNSECSELEKKNRELSEKADSL  
AAS57931.1 - - - - -VEKCLKKMEQNKTAAT - RYRQKKRAE - - - - -QDTLNSECADLEKRNRELAEKADSL  
AAD28370.1 - - - - -GDRKQKKRDQNKSAAL - RYRQKKRAE - - - - -GEALEGECQGLEARNRELKERAESV  
AAH05174.1 - - - - -GDRKQKKRDQNKSAAL - RYRQKKRAE - - - - -GEALEGECQGLEARNRELKERAESV  
AAP36242.1 - - - - -GDRKQKKRDQNKSAAL - RYRQKKRAE - - - - -GEALEGECQGLEARNRELKERAESV  
NP\_036200.2 - - - - -GDRKQKKRDQNKSAAL - RYRQKKRAE - - - - -GEALEGECQGLEARNRELKERAESV  
AAK00584.1 - - - - -GDRKQKKRDQNKSAAL - RYRQKKRAE - - - - -GEALEGECQGLEARNRELKERAESV  
AAM92263.1 - - - - -GDRKQKKRDQNKSAAL - RYRQKKRAE - - - - -GEALEGECQGLEARNRELKERAESV  
BAA25313.1 - - - - -GDRKQKKRDQNKSAAL - RYRQKKRAE - - - - -GEALEGECQGLEARNRELKERAESV

NP\_109618.1 -----GDRKQKKRDQNKSAAL-RYRQKRAE-----GEALEGECQGLEARNRELRERAESV  
NP\_758839.2 -----GDRKQKKRDQNKSAAL-RYRQKRAE-----GEALEGECQGLEARNRELRERAESV  
AAA92437.1 -----LDKKDRKKLQNKNAAI-RYRMKKKGE-----AQGIKGEEQELEELNTKTKTKVDDL  
BAC21159.1 -----LNKKDRKKLQNKNAAI-RYRQKKKNE-----AVGIKSEEQVLEEENSKLKVKVEDL  
AAG45935.1 -----DDRRSRKKEQNKNAAT-RYRQKKKAE-----VEVLLKKEEQTLRQRHTELGEKCSDL  
XP\_319661.1 -----EEKKSRKKEQNKNAAT-RYRQKKKAE-----IEEILIEESKLRERNDDELKRKSQDL  
AAF71698.1 -----EDRKIRKKEQNKNAAT-RYRQKKKLE-----MENVLGEEHVLSKENEQLRRTLQER  
NP\_524897.1 -----EDRKIRKKEQNKNAAT-RYRQKKKLE-----MENVLGEEHVLSKENEQLRRTLQER  
NP\_724333.1 -----EDRKIRKKEQNKNAAT-RYRQKKKLE-----MENVLGEEHVLSKENEQLRRTLQER  
NP\_506515.1 -----DEETDRRMLNRIAIV-RYREKKRAE-----KKGRKMEFQEVADRNRILLQKERQL  
NP\_872160.1 -----DEETDRRMLNRIAIV-RYREKKRAE-----KKGRKMEFQEVADRNRILLQKERQL  
CAE61002.1 -----DEETDRRRALNRIAIV-RYREKKRAE-----KMGRQKENQAVFDRNRILLQKERQL  
CAE63232.1 -----PEKKERKKAQNRLAAT-RYREKKRRE-----KEEALTCIEGLTVTNLKLKQVSEL  
NP\_510456.1 -----PEKKERKKAQNRLAAT-RYREKKRRE-----KEEAMTCIEGLSVTNGKLDQVSEL  
CAE73317.1 -----EEILRRKRIQNNLAAA-RYRKRQREA-----RESAEQELGDLTKRNDDELREQVYRM  
NP\_496919.1 -----EEILRRKRIQNNLAAA-RYRKRQREA-----RESAESELGDLTRRNDDELRDQVSRM  
CAE58480.1 -----RKREQNKVAAA-RYRDKQKAK-----WQDLLDKREVEEKRNVRLLKQVEKL  
NP\_500318.1 -----RKRQONKVAAA-RYRDKQKAK-----WQDLLDQLEAEEDRNQRLKQAGHL  
AAM00250.1 -----HLSRITKRQLNTLAAR-RYRQKLDK-----VAQLEEEELAAVKRERDELKMRVSKL  
CAC14775.1 -----GSSKIRKRQRNTEAAR-RYRQKLDK-----ASELEEALEAMGKERDELRLKLAKA  
EAA46874.1 -----DEILADKRRRNNAAAA-KYRQKKVDR-----ISELEDCVAEISKERDDLKLQAKR  
XP\_328761.1 -----KRQRNNTIAAK-KYRQKKIDR-----IQELEEEVDQIKKEREELRLMLAKR  
EAA54005.1 -----SESVVRKRERNTAAAR-RYRQKRLDR-----IKELEDELAKVTADRDELKLLARQ  
NP\_726489.1 -----RSRDEDCMERRRAAAS-RYRNKMRNE-----HKDLIKQNAQLQOENQELHERISRL  
CAE64642.1 -----VSEDEKKRLRNTEAAR-RCREKIKRK-----TDDLEQQLTGLTAQNDLMNQHRIRL  
NP\_506292.1 -----VSEDEKKRLRNTEAAR-RCREKIKRK-----TDDLETELTRLTARNEVMNQHRIRL  
1CI6B -----MEYKMRERNNIAVR-KSRDKAKMR-----NLETQHKVLELTAENERLQKKVEQL  
AAQ72476.1 -----RRERNNIAVR-KSRDKAKMR-----NLETQHKVLELTAENERLQKKVEQL  
AAA09274.1 -----SDEYKMRERNNIAVR-KSRDKAKMR-----NLETQHKVLELTAENERLQKKVEQL  
NP\_034013.1 -----SDEYKMRERNNIAVR-KSRDKAKMR-----NLETQHKVLELTAENERLQKKVEQL  
AAA40972.1 -----SDEYKMRERNNIAVR-KSRDKAKMR-----NLETQHKVLELTAENERLQKKVEQL  
CEBB\_RAT -----SDEYKMRERNNIAVR-KSRDKAKMR-----NLETQHKVLELTAENERLQKKVEQL  
BAA25315.1 -----SDEYKMRERNNIAVR-KSRDKAKMR-----NLETQHKVLELTAENERLQKKVEQL  
NP\_077039.2 -----SDEYKMRERNNIAVR-KSRDKAKMR-----NLETQHKVLELTAENERLQKKVEQL  
CAA43179.1 -----SDEYKMRERNNIAVR-KSRDKAKMR-----NLETQHKVLELTAENERLQKKVEQL  
1HJB -----SDEYKIRRERNNIAVR-KSRDKAKMR-----NLETQHKVLELTAENERLQKKVEQL  
S12788 -----SDEYKIRRERNNIAVR-KSRDKAKMR-----NLETQHKVLELTAENERLQKKVEQL  
1IO4 -----SDEYKIRRERNNIAVR-KSRDKAKMR-----NLETQHKVLELTAENERLQKKVEQL  
AAH05132.2 -----SDEYKIRRERNNIAVR-KSRDKAKMR-----NLETQHKVLELTAENERLQKKVEQL  
NP\_005185.2 -----SDEYKIRRERNNIAVR-KSRDKAKMR-----NLETQHKVLELTAENERLQKKVEQL  
1H89 -----EYKIRRERNNIAVR-KSRDKAKMR-----NLETQHKVLELTAENERLQKKVEQL  
NP\_990584.1 -----SDEYKLRRERNNIAVR-KSRDKAKMR-----NLETQHKVLELTAENERLQKKVEQL  
BAB40971.1 -----SEYRLRRERNNIAVR-KSRDKAKMR-----NLETQHKVLELTAENERLQKKVEQL  
AAD19576.1 -----SDEYKIRRERNNIAVR-KSRDKAKMR-----NLETQHKVLELTAENERLQKKVEQL  
BAA09637.1 -----SDEYKIRRERNNIAVR-KSRDKAKMR-----NLETQHKVLELTAENERLQKKVEQL  
S66246 -----SDEYKIRRERNNIAVR-KSRDKAKMR-----NLETQHKVLELTAENERLQKKVEQL  
NP\_789745.1 -----SDEYKIRRERNNIAVR-KSRDKAKMR-----NLETQHKVLELTAENERLQKKVEQL  
CAA76309.1 -----SNDYKLRRERNNIAVR-KSRDKAKIR-----NLETQHKVLELTAENERLQKKVEQL  
AAH62523.1 -----SDEYRQRRERNNLAVR-KSRDKAKMR-----NLETQHKVLELTAENERLQKKVEQL  
NP\_571959.2 -----SDEYRQRRERNNLAVR-KSRDKAKMR-----NLETQHKVLELTAENERLQKKVEQL  
AAL54865.1 -----SDEYRQRRERNNLAVR-KSRDKAKMR-----NLETQHKVLELTAENERLQKKVEQL  
AAN41660.1 -----SEYKQRRERNNLAVR-KSRDKAKMR-----NTETQHKVLELTAENERLQKKVEQL  
AAS93421.1 -----SEYKVRERNNLAVR-KSRDKAKMR-----NLETQHKVLELTAENERLQKKVEQL  
CAA72289.1 -----SNEYRVRERNNIAVR-KSRDKAKQR-----NVETQQKVLELTSNDNRLRKRVEQL  
XP\_133376.1 -----SNEYRVRERNNIAVR-KSRDKAKQR-----NVETQQKVLELTSNDNRLRKRVEQL  
NP\_036656.1 -----SNEYRVRERNNIAVR-KSRDKAKQR-----NVETQQKVLELTSNDNRLRKRVEQL  
JC4311 -----SNEYRVRERNNIAVR-KSRDKAKQR-----NVETQQKVLELTSNDNRLRKRVEQL

NP\_031704.1 -----SNEYRVRRRERNNIAVR-KSRDKAKQR----NVETQQKVLELTSDNDRLRKRVEQL  
CEBA\_BOVIN -----SNEYRVRRRERNNIAVR-KSRDKAKQR----NVETQQKVLELTSDNDRLRKRVEQL  
CEBA\_HUMAN -----SNEYRVRRRERNNIAVR-KSRDKAKQR----NVETQQKVLELTSDNDRLRKRVEQL  
CEBA\_MOUSE -----SNEYRVRRRERNNIAVR-KSRDKAKQR----NVETQQKVLELTSDNDRLRKRVEQL  
NP\_004355.2 -----SNEYRVRRRERNNIAVR-KSRDKAKQR----NVETQQKVLELTSDNDRLRKRVEQL  
AAD19575.1 -----SNEYRVRRRERNNIAVR-KSRDKAKQR----NVETQQKVLELTSDNDRLRKRVEQL  
AAH63874.1 -----SNEYRVRRRERNNIAVR-KSRDKAKQR----NVETQQKVLELTSDNDRLRKRVEQL  
1NWQ -----SNEYRVRRRERNNIAVR-KSRDKAKQR----NVETQQKVLELTSDNDRLRKRVEQL  
AAR24284.1 -----SNEYRVRRRERNNIAVR-KSRDKAKQR----NVETQLKVLELTSDNDRLRKRVEQL  
S26295 -----SNEYRVRRRERNNIAVR-KSRDKAKQR----NVETQQKVLELTSDNDRLRKRVEQL  
CAA60698.1 -----SNEYRVRRRERNNIAVR-KSRDKAKQR----NVETQQKVLELTSDNDRLRKRVEQL  
554834 -----SNEYRVRRRERNNIAVR-KSRDKAKQR----NVETQQKVLELTSDNDRLRKRVEQL  
A56554 -----SNEYRVRRRERNNIAVR-KSRDKAKMR----NVETQQKVFELSSDNDKLRKRVEQL  
I51171 -----STEYRVRRRERNNIAVR-KSRDKAKMR----NVETQQKVVELSNDNEKLRKRVEQL  
NP\_571960.1 -----STEYRLRRERNNIAVR-KSRDKAKMR----NVETQQKVIELSADNDRLRKRVEHL  
A37280 -----SLEYRLRRERNNIAVR-KSRDKAKRR----IMETQQKVLELYMAENERLRSRVDQL  
NP\_058791.1 -----SLEYRLRRERNNIAVR-KSRDKAKRR----IMETQQKVLELYMAENERLRSRVDQL  
XP\_139135.2 -----SLEYRLRRERNNIAVR-KSRDKAKRR----IMETQQKVLELYMAENERLRSRVDQL  
AAC50709.1 -----SLEYRLRRERNNIAVR-KSRDKAKRR----ILETQQKVLELYMAENERLRSRVEQL  
NP\_001796.2 -----SLEYRLRRERNNIAVR-KSRDKAKRR----ILETQQKVLELYMAENERLRSRVEQL  
CEBE\_HUMAN -----SLEYRLRRERNNIAVR-KSRDKAKRR----ILETQQKVLELYMAENERLRSRVEQL  
CAA10944.1 -----SLEYRLRRERNNIAVR-KSRDKAKRR----ILETQQKVLELYMAENERLRSRVEQL  
AAC51130.1 -----SLEYRLRRERNNIAVR-KSRDKAKRR----ILETQQKVLELYMAENERLRSRVEEL  
CEBD\_HUMAN -----SPEYRQRRERNNIAVR-KSRDKAKRR----NQEMQQKLVELSAENEKLRHQRVEQL  
NP\_005186.2 -----SPEYRQRRERNNIAVR-KSRDKAKRR----NQEMQQKLVELSAENEKLRHQRVEQL  
AAA59927.1 -----SPEYRQRRERNNIAVR-KSRDKAKRR----NQEMQQKLVELSAENEKLRHQRVEQL  
CEBD\_MOUSE -----SPEYRQRRERNNIAVR-KSRDKAKRR----NQEMQQKLVELSAENEKLRHQRVEQL  
NP\_031705.2 -----SPEYRQRRERNNIAVR-KSRDKAKRR----NQEMQQKLVELSAENEKLRHQRVEQL  
NP\_037286.1 -----SPEYRQRRERNNIAVR-KSRDKAKRR----NQEMQQKLVELSAENEKLRHQRVEQL  
JC7264 -----SPEYRQRRERNNIAVR-KSRDKAKRR----NQEMQQKLVELSAENEKLRHQRVEQL  
NP\_776692.1 -----SPEYRQRRERNNIAVR-KSRDKAKRR----NQEMQQKLVELSAENEKLRHQRVEQL  
AAH45282.1 -----SPEYRQRRERNNIAVR-KSRDKAKQR----NLDMQQKMIELGAENERLHKTIDQL  
AAH56512.1 -----SPEYRQRRERNNIAVR-KSRDKAKQR----NLDMQQKMIELGAENERLHKTIDQL  
AAH62522.1 -----SPEYRQRRERNNIAVR-KSRDKAKQR----NLDMQQKMIELGAENERLHKTIDQL  
NP\_571962.1 -----SPEYRQRRERNNIAVR-KSRDKAKQR----NLDMQQKMIELGAENERLHKTIDQL  
BAC92757.1 -----SPEYRQRRERNNIAVR-KSRDKAKRR----NVDMQQRLLELSSENEKLRHKKIELL  
BAC92758.1 -----SPEYRQRRERNNIAVR-KSRDKAKRR----NTDMQQKMLELSSENEKLRHKKIELL  
I51172 -----SPEYRQRRERNNIAVR-KSRDKAKRR----NMDMQQKLELSSENEKLRHKKIDML  
BAB40972.1 -----SVEYRQRRERNNIAVR-KSRDKARRR----ILLTQQRAMQLQEENQKLQLRIGQL  
NP\_571912.1 -----SAEYRQRRERNNIAVR-KSRDKARRR----IQMTQQRALQLQDENHRLQVHIQRL  
A43481 -----TDEYRRRRERNNIAVR-KSREKAKVR----SREVEERVKSLLKEKDALIRQLGEM  
NP\_523843.1 -----TDEYRRRRERNNIAVR-KSREKAKVR----SREVEERVKSLLKEKDALIRQLGEM  
CEB\_DROME -----TDEYRRRRERNNIAVR-KSREKAKVR----SREVEERVKSLLKEKDALIRQLGEM  
CEB\_DROVI -----TEEYRRRRERNNIAVR-KSREKAKVR----SKEVEERVKSLLKEKDALIRQLSEM  
XP\_309553.1 -----TDEYRRRRERNNIAVR-KSREKAKVR----SREVEEKVKTLLKEKDVLRKIEEK  
S26300 -----SDEYRQRRERNNMVAVK-KSRLKSKQK----AQDTLQRVNQLKEENERLEAKIKLL  
XP\_341843.1 -----SDEYRQRRERNNMVAVK-KSRLKSKQK----AQDTLQRVNQLKEENERLEAKIKLL  
CEBG\_MOUSE -----SDEYRQRRERNNMVAVK-KSRLKSKQK----AQDTLQRVNQLKEENERLEAKIKLL  
CEBG\_RAT -----SDEYRQRRERNNMVAVK-KSRLKSKQK----AQDTLQRVNQLKEENERLEAKIKLL  
NP\_001797.1 -----SDEYRQRRERNNMVAVK-KSRLKSKQK----AQDTLQRVNQLKEENERLEAKIKLL  
A36673 -----SDEYRQRRERNNMVAVK-KSRLKSKQK----AQDTLQRVNQLKEENERLEAKIKLL  
AAC60217.1 -----SDEYRQRRERNNMVAVK-KSRLKSKQK----AQDTLQRVNQLKEENERLEAKIKLL  
I50223 -----SDEYRQRRERNNMVAVK-KSRLKSKQK----AQDTLQRVNQLKEENERLEAKIKLL  
NP\_571961.1 -----SDEYRQRRERNNLAVK-KSRMRSKQK----AQDTQQRVNELKEENERLEAKIKLL  
XP\_315443.1 -----DDEYRRKRDRNNQAVK-RSRVKSMMK----TEETQQRVNDLRLKNQLLEDKIDNQ  
A53066 -----TQEYVDKRRARNNVAVR-KSRAKAKEK----QRETEGRVKSLLDQNDQLQKKVDLL  
AAG61258.1 -----TQEYVDKRRARNNVAVR-KSRAKAKEK----QRETEGRVKNLLDQNDQLQKKVDLL

BAD16556.1 - - - - -TMEYVEKRARNNVAVR - KSRAKAKEK - - - - QRETEGRVKGLMDQNHQLQKKVDML  
NP\_871835.1 - - - - -EDDYSTKRKRNNNEAVN - RTRQKKRQE - - - - ENDTAEKVDELKKENETLERKVEQL  
T15174 - - - - -EDDYSTKRKRNNNEAVN - RTRQKKRQE - - - - ENDTAEKVDELKKENETLERKVEQL  
CAE67150.1 - - - - -EDDYTSKRKRNNNEAVN - RTRQKKRQE - - - - ENDTAEKVDELKKENEALERKVEQL  
AAB06796.1 - - - - -DEEYRKKRERNNVSVR - ESREKKRQN - - - - ALIVEQKVQDLTKENSLLEERVSL  
NP\_497269.1 - - - - -SSDYRHKRDKNNLASQ - KSRQKRQAK - - - - IRESKEERERLEKRKVQLQAMVLT  
T16528 - - - - -SSDYRHKRDKNNLASQ - KSRQKRQAK - - - - IRESKEERERLEKRKVQLQAMVLT  
CAE69150.1 - - - - -SSDYRLKRDKNNLASQ - KSRQKRQAK - - - - IREAKEEKEQLERRQVQLKAMVT  
CAE58077.1 - - - - -SYDYRTMRDKNNLASQ - RSRQKRQDK - - - - IRETREEKGRLEARNIELKAQILGL  
NP\_648434.1 - - - - -DPAYKEKRKKNNNEAVQ - RTREKTKKS - - - - AEERKKRIDDLRKQNDALKVQIETS  
A41524 - - - - -DEKYWTRRKKNNVAAK - RSRDARRLK - - - - ENQITIRAAFLEKENTALRTEVAEL  
NP\_990713.1 - - - - -DEKYWTRRKKNNVAAK - RSRDARRLK - - - - ENQITIRAAFLEKENTALRTEVAEL  
TEF\_PHOSU - - - - -DEKYWTRRKKNNVAAK - RSRDARRLK - - - - ENQITIRAAFLEKENTALRTEVAD -  
CAD97856.1 - - - - -DEKYWTRRKKNNVAAK - RSRDARRLK - - - - ENQITIRAAFLEKENTALRTEVAEL  
NP\_003207.1 - - - - -DEKYWTRRKKNNVAAK - RSRDARRLK - - - - ENQITIRAAFLEKENTALRTEVAEL  
NP\_059072.1 - - - - -DEKYWTRRKKNNVAAK - RSRDARRLK - - - - ENQITIRAAFLEKENTALRTEVAEL  
NP\_062067.1 - - - - -DEKYWTRRKKNNVAAK - RSRDARRLK - - - - ENQITIRAAFLEKENTALRTEVAEL  
CAB62497.1 - - - - -DEKYWTRRKKNNVAAK - RSRDARRLK - - - - ENQITIRAAFLEKENTALRTEVAEL  
AAA81373.1 - - - - -DEKYWTRRKKNNVAAK - RSRDARRLK - - - - ENQITIRAAFLEKENTALRTEVAEL  
AAS45600.1 - - - - -DEKYWTRRKKNNVAAK - RSRDARRLK - - - - ENQITIRAAFLEKENTALRTEVAEL  
NP\_705617.1 - - - - -DEKYWTRRKKNNVAAK - RSRDARRLK - - - - ENQITIRAAFLEKENTALRTEVAEL  
TEF\_HUMAN - - - - -DEKYWTRRKKNNVAAK - RSRDARRLK - - - - ENQITIRAAFLEKENTALRTEVAEL  
AAH54981.1 - - - - -DEKYWNRKKNNIAAK - RSRDARRLK - - - - ENQITVRAAFLEKENTALRSEVADL  
AAA58445.1 - - - - -DDKYWARRRKNMMAAK - RSRDARRLK - - - - ENQIAIRASFLEKENSALRQEVADL  
AAH57693.1 - - - - -DDKYWARRRKNMMAAK - RSRDARRLK - - - - ENQIAIRASFLEKENSALRQEVADL  
BAC37522.1 - - - - -DDKYWARRRKNMMAAK - RSRDARRLK - - - - ENQIAIRASFLEKENSALRQEVADL  
XP\_343957.1 - - - - -DDKYWARRRKNMMAAK - RSRDARRLK - - - - ENQIAIRASFLEKENSALRQEVADL  
HLF\_RAT - - - - -DDKYWARRRKNMMAAK - RSRDARRLK - - - - ENQIAIRASFLEKENSALRQEVADL  
NP\_002117.1 - - - - -DDKYWARRRKNMMAAK - RSRDARRLK - - - - ENQIAIRASFLEKENSALRQEVADL  
NP\_766151.1 - - - - -DDKYWARRRKNMMAAK - RSRDARRLK - - - - ENQIAIRASFLEKENSALRQEVADL  
AAC00211.1 - - - - -DDKYWQRRKKNNVAAK - RSRDARRLK - - - - ENQITVRAAFLEKENSALRQEVAAEL  
NP\_571475.1 - - - - -DDKYWQRRKKNNVAAK - RSRDARRLK - - - - ENQITVRAAFLEKENSALRQEVAAEL  
NP\_001343.2 - - - - -DEKYWSRRYKNNEAAK - RSRDARRLK - - - - ENQISVRAAFLEKENALLRQEVVAV  
NP\_058670.1 - - - - -DEKYWSRRYKNNEAAK - RSRDARRLK - - - - ENQISVRAAFLEKENALLRQEVVAV  
NP\_036675.1 - - - - -DEKYWSRRYKNNEAAK - RSRDARRLK - - - - ENQISVRAAFLEKENALLRQEVVAV  
AAH18323.1 - - - - -DEKYWSRRYKNNEAAK - RSRDARRLK - - - - ENQISVRAAFLEKENALLRQEVVAV  
A55558 - - - - -DEKYWSRRYKNNEAAK - RSRDARRLK - - - - ENQISVRAAFLEKENALLRQEVVAV  
AAR99621.1 - - - - -DEKYWSRRYKNNEAAK - RSRDARRLK - - - - ENQISVRAAFLEKENALLRQEVVAV  
AAR99622.1 - - - - -DEKYWSRRYKNNEAAK - RSRDARRLK - - - - ENQISVRAAFLEKENALLRQEVVAV  
BAA05833.1 - - - - -DEKYWSRRYKNNEAAK - RSRDARRLK - - - - ENQISVRAAFLEKENALLRQEVVAV  
AAP36478.1 - - - - -DEKYWSRRYKNNEAAK - RSRDARRLK - - - - ENQISVRAAFLEKENALLRQEVVAV  
AAF04508.1 - - - - -DDKYWARRRKNNIAAK - RSRDARRQK - - - - ENQIAMRARYLEKENATLHQEVEQL  
AAF04509.1 - - - - -DDKYWARRRKNNIAAK - RSRDARRQK - - - - ENQIAMRARYLEKENATLHQEVEQL  
NP\_524832.2 - - - - -DDKYWARRRKNNIAAK - RSRDARRQK - - - - ENQIAMRARYLEKENATLHQEVEQL  
AAF15511.1 - - - - -DDKYWARRRKNNIAAK - RSRDARRQK - - - - ENQIAMRARYLEKENATLHQEVEQL  
AAO25043.1 - - - - -DDKYWARRRKNNIAAK - RSRDARRQK - - - - ENQIAMRARYLEKENATLHQEVEQL  
AAS93764.1 - - - - -DDKYWARRRKNNIAAK - RSRDARRQK - - - - ENQIAMRARYLEKENATLHQEVEQL  
NP\_729297.1 - - - - -DDKYWARRRKNNIAAK - RSRDARRQK - - - - ENQIAMRARYLEKENATLHQEVEQL  
NP\_729298.1 - - - - -DDKYWARRRKNNIAAK - RSRDARRQK - - - - ENQIAMRARYLEKENATLHQEVEQL  
NP\_729301.1 - - - - -DDKYWARRRKNNIAAK - RSRDARRQK - - - - ENQIAMRARYLEKENATLHQEVEQL  
NP\_729302.1 - - - - -DDKYWARRRKNNIAAK - RSRDARRQK - - - - ENQIAMRARYLEKENATLHQEVEQL  
NP\_729303.1 - - - - -DDKYWARRRKNNIAAK - RSRDARRQK - - - - ENQIAMRARYLEKENATLHQEVEQL  
XP\_316411.1 - - - - -DDKYWARRRKNMMAAK - RSRDARRMK - - - - ENQIALRAGYLEKENMNLHREVEQL  
BAC06840.1 - - - - -DQKYWSRRKKNNVAAK - RSREARRIK - - - - ENQIALRAAYLEKENSTLKDDELKNL  
AAQ22473.1 - - - - -DAAYYERRRKNNAAK - KSRDRRIK - - - - EDEIAIRAAYLERQNIELLCQIDAL  
NP\_525049.1 - - - - -DAAYYERRRKNNAAK - KSRDRRIK - - - - EDEIAIRAAYLERQNIELLCQIDAL  
S17370 - - - - -DAAYYERRRKNNAAK - KSRDRRIK - - - - EDEIAIRAAYLERQNIELLCQIDAL

NP\_572367.1 -----DTAYYERRRRKNNAAAK-KSRDRRRRIK-----EDEIAIRAAYLERQNIPELLCRIDAL  
XP\_321187.1 -----DSAYYERRRKNNAAAK-KSRDRRRRIK-----EDEIAIRAAFLERENIELKFEELAAA  
CAE55183.1 -----DPSYWEKRRRKNNEAAK-RSRDARRAK-----EDEIAIRCAFLERENCHLKFVTDTL  
NP\_504576.1 -----DVAYWERRRRKNNDAAK-RSRDQRRMK-----EDEMAHRATSLERENMLLRVELDQL  
T31706 -----DVAYWERRRRKNNDAAK-RSRDQRRMK-----EDEMAHRATSLERENMLLRVELDQL  
CAE64514.1 -----DEAYWERRRRKNNDAAK-RSRDQRRRIK-----EDEMACRAANLEHENMLLRVELDQL  
CAE72616.1 -----DSAYFERRRRKNNDAAK-RSRDARRQK-----EEAIASKAQKLEQENLQLRGQIQLL  
NP\_493610.1 -----DSAYFERRRRKNNDAAK-RSRDARRQK-----EEQIASKAHALERENMQLRGKVSSL  
NP\_611101.1 -----DAKYFERRRRKNNEAAK-RSRDARKIR-----EDRIAFRAALLEQENSILRAQVLAL  
AAC59867.2 -----DDCYWDKRRRKNNEAAK-RSREKRRAG-----DLALEGRVIALLEENARLRAELLAL  
AAC59875.1 -----DDSYWDKRRRKNNEAAK-RSREKRRAG-----DLVLEGRIIALLEENARLRAELLAL  
AAH08197.1 -----DAMYWEKRRRKNNEAAK-RSREKRRLN-----DLVLENKLIALLGEENATLKAELLSL  
CAA45597.1 -----DAMYWEKRRRKNNEAAK-RSREKRRLN-----DLVLENKLIALLGEENATLKAELLSL  
NP\_989949.1 -----DAMYWEKRRRKNNEAAK-RSREKRRLN-----DLVLENKLIALLGEENATLKAELLSL  
NP\_446179.1 -----DAMYWEKRRRKNNEAAK-RSREKRRLN-----DLVLENKLIALLGEENATLKAELLSL  
NP\_059069.1 -----DAMYWEKRRRKNNEAAK-RSREKRRLN-----DLVLENKLIALLGEENATLKAELLSL  
NP\_005375.1 -----DAMYWEKRRRKNNEAAK-RSREKRRLN-----DLVLENKLIALLGEENATLKAELLSL  
AAH60943.1 -----DASYWEKRRRKNNEAAK-RSREKRRLN-----DMVLENRVIALNDENVRLKTELLQL  
XP\_372707.1 -----DTVYWEKRRRKNNEAAK-RSREKRRLN-----DAAIEGRLAALMEENALLKGELKAL  
AAM29449.1 -----DESYWDRRRRNNEAAK-RSREKRRYN-----DMVLEQRVIELTKENHVLKAQLDAI  
NP\_723075.1 -----DESYWDRRRRNNEAAK-RSREKRRYN-----DMVLEQRVIELTKENHVLKAQLDAI  
CAA72535.1 -----DESYWDRRRRNNEAAK-RSREKRRYN-----DMVLEQRVIELTKENHVLKAQLDAI  
NP\_477191.1 -----DESYWDRRRRNNEAAK-RSREKRRYN-----DMVLEQRVIELTKENHVLKAQLDAI  
XP\_317705.1 -----DDSYWDRRRRNNEAAK-RSREKRRFN-----DMVLEQRVVELTKENHVLKAQLDAI  
CAE68044.1 -----DESYWDRRRRNNEAAK-RSREKRRFN-----DMVLEQRVVELTKENHVLKAQLDAI  
NP\_502961.1 -----DEAYLDRRRRNNEAAR-KSRESRKKV-----DQDNSVRVTYLERENQCLRVYVQQL  
AAC49425.1 -----DKIKQERRRRKNTEASQ-RFRIKKKQK-----NFENMNKLQNLNTQINKLRDRIEQL  
NP\_012282.1 -----DKIKQERRRRKNTEASQ-RFRIKKKQK-----NFENMNKLQNLNTQINKLRDRIEQL  
XP\_386827.1 -----SKKADEKRRQNAVAST-RHRRKKKIM-----QEENSKQLQELDRDERRLMEIRIEEL  
AAD38380.1 -----EDKRRRNNTAASA-RFRVKKKMR-----EQALEKTQVQDTRTEKNAALEARVVAL  
EAA62399.1 -----RAAEEDRRRRNNTAASA-RFRMKKKQR-----EQTLERTVRETTEKNASLEARVAQL  
CYS3\_NEUCR -----EDKRRRNNTAASA-RFRIKKKQR-----EQALEKSAKEMSEKVTQLEGRIQAL  
XP\_385347.1 -----HAAEEDKRRRNNTAASA-RFRIKKKQR-----EQALEKSAKEMSEKVSVLESKVSQAL  
NP\_594523.1 -----TAAEEDKRRRNNTAASA-RFRIKKKQR-----EQALEKSAKEMSEKVSVLESKVSQAL  
EAL01493.1 -----KRRRNNTAASA-RFRIKKKQR-----EQALEKSAKEMSEKVSVLESKVSQAL  
EAK98059.1 -----KRRRNNTAASA-RFRFKKKLR-----EKQMETKINNLEDLIVNLENQLNNL  
1DGC -----KRARNTEAAR-RSRARKLQR-----MKQLEDKVEELLSKNYHLENEVARL  
1YSAD -----KRARNTEAAR-RSRARKLQR-----MKQLEDKVEELLSKNYHLENEVARL  
1LD4 -----KRARNTEAAR-RSRARKLQR-----MKQLEDKVEELLSKNYHLENEVARL  
1YSAC -----KRARNTEAAR-RSRARKLQR-----MKQLEDKVEELLSKNYHLENEVARL  
2DGC -----KRARNTEAAR-RSRARKLQR-----MKQLEDKVEELLSKNYHLENEVARL  
NP\_010907.1 -----KRARNTEAAR-RSRARKLQR-----MKQLEDKVEELLSKNYHLENEVARL  
CAE52206.1 -----KRARNTEAAR-RSRARKLQR-----MKQLEDKVEELLSKNYHLENEVARL  
CAE52208.1 -----KRARNTEAAR-RSRARKLQR-----MKQLEDKVEELLSKNYHLENEVARL  
CAE52210.1 -----KRARNTEAAR-RSRARKLQR-----MKQLEDKVEELLSKNYHLENEVARL  
CAE52217.1 -----KRARNTEAAR-RSRARKLQR-----MKQLEDKVEELLSKNYHLENEVARL  
CAE52220.1 -----KRARNTEAAR-RSRARKLQR-----MKQLEDKVEELLSKNYHLENEVARL  
NP\_984085.1 -----DDPVALKRARNTEAAR-RSRARKLER-----MNQLEERVEQLLQKNSELEAEVARL  
AAF18140.1 -----KRAKNTEAAR-RSRARKMER-----MSQLEDKVENLINEKQALQDQVERL  
EAK95477.1 -----KRAKNTEAAR-RSRARKMER-----MSQLEDKVENLINEKQALQDQVERL  
BAC55240.1 -----KRAKNTEAAR-RSRARKMER-----MNQLEDKVEDLVGEKQALQDEVDRL  
A30208 -----KRARNTEAAR-KSREKKAQR-----LEELEAKIEELIAERDR-----  
XP\_323369.1 -----KRARNTEAAR-KSREKKAQR-----LEELEAKIEELIAERDR-----  
EAA48944.1 -----KRARNTEAAR-KSREKAMR-----FEELEDKLEKLTAEERDFHFN-----  
XP\_389462.1 -----KRARNTEAAR-KSREKAMK-----MDELEDKIAKLEERD-----  
EAK83968.1 -----KDPRVAKRLSNTLAAR-RSRHRKAE-----LRLLENEKIEALTSEVESWKRRCQA  
AAL09315.1 -----KRARNTEAAR-KSRARKLER-----QGDMMERIAELSKELEETRQMV-----

EAA59883.1 -----KRARNTEAAR-KSRARKLER-----QGMERRIAELSKELEETROMVE--  
CPC1\_CRYPA -----KRAKNTLAAR-KSRARKAER-----MDELERQVRELEAEKEKLAELA--  
NP\_498426.1 -----SPKYLEKRMKNNEAAK-KSRASRKHR-----EQKNQ TENELLKRKNAALEEELKQA  
XP\_310558.1 -----DWRYREQRDKNNEASR-KSRINRKDR-----ELKLELEADRLSAQHQLSYEERRL

AAP36398.1 KNEKQHLYMLNLH---  
NP\_001665.1 KNEKQHLYMLNLH---  
1604249C KNEKQHLYMLNLH---  
C34223 KNEKQHLYMLNLH---  
AAP92420.1 KNEKQHLYMLNLH---  
NP\_031524.2 KNEKQHLYMLNLH---  
BAA09095.1 KNEKQHLYMLNLH---  
NP\_037044.1 KNEKQHLYMLNLH---  
BAB84092.1 -----  
AAP93895.1 -----  
AAP93896.1 -----  
NP\_004015.2 -----  
NP\_957258.1 KNQKQQLVYMLNLH---  
AAF21148.1 KQERQQLILMLNRH---  
NP\_569736.1 KQERQQLILMLNRH---  
BAB20088.1 KLERQQLILMLNRH---  
NP\_446346.1 KLERQQLILMLNRH---  
NP\_620473.1 ETERQKLVDMMLKSH---  
XP\_321586.1 ETEYRKLVEILQAH---  
1FOSE LKEKEKLEFILA-----  
1FOSG LKEKEKLEFILA-----  
AAG47951.1 LKEKEKLEFILA---  
FOS\_CRIGR LKEKEKLEFILA---  
XP\_234422.2 LKEKEKLEFILA---  
AAA42348.1 LKEKEKLEFILA---  
NP\_877587.1 LKEKEKLEFILA---  
NP\_034364.1 LKEKEKLEFILA---  
NP\_005243.1 LKEKEKLEFILA---  
CAB40144.1 LKEKEKLEFILA---  
FOS\_FELCA LKEKEKLEFILA---  
FOS\_MESAU LKEKEKLEFILA---  
FOS\_PIG LKEKEKLEFILA---  
FOS\_RAT LKEKEKLEFILA---  
CAA75757.1 LKEKEKLEFILA---  
E34223 LKEKEKLEFILA---  
FOS\_SHEEP LKEKEKLEFILA---  
NP\_056890.1 LKEKEKLEFILA---  
NP\_955598.1 LKEKEKLEFILA---  
FOSX\_MSVFR LKEKEKLEFILA---  
FOS\_MSVFB LKEKEKLEFILA---  
1A02F LKEKEKL-----  
AAA66158.1 LKEKEKLEFILA---  
AAN03532.1 LKEKEKLEFILA---  
NP\_990839.1 LKEKEKLEFILA---  
FOS\_AVINK LKEKEKLEFILA---  
AAO11836.1 VKEKEKLEFILA---  
CAD56866.1 LKEKERLEFILATH---  
BAB39769.2 LKEKERLEFILA---  
NP\_991132.1 LKEKERLEFILA---  
BAC77043.1 LKEKERLEFILA---  
FOS\_CYPCA LKEKERLEFILA---

|             |                    |
|-------------|--------------------|
| AAK58088.1  | LKEKERLEFILA AH--- |
| FOS_FUGRU   | LKEKERLEFILA AH--- |
| FOS_TETFL   | LKEKERLEFILA AH--- |
| BAC77045.1  | LKEKEKLEFIMA AH--- |
| BAC77046.1  | LKEKEKLEFILA AH--- |
| A60089      | LKEKEKLEFILA AH--- |
| AAC59780.1  | LKEKERLEHVLA FH--- |
| CAD56865.1  | LKEKERLEHVLA FH--- |
| AAC52888.1  | QKQKERLELVLE AH--- |
| AAH52917.1  | QKQKERLELVLE AH--- |
| AAP36227.1  | QKQKERLELVLE AH--- |
| NP_034365.1 | QKQKERLELVLE AH--- |
| NP_005429.1 | QKQKERLELVLE AH--- |
| NP_037085.1 | QKQKERLELVLE AH--- |
| CAD56862.1  | QKEKDKLELVLE AH--- |
| NP_005244.1 | QKEKEKLEFMLVA H--- |
| NP_032063.2 | QKEKEKLEFMLVA H--- |
| AAA61951.1  | QKEKEKLEFMLVA H--- |
| FRA2_MOUSE  | QKEKEKLE-----      |
| AAC08718.1  | QKEKEKLE-----      |
| AAC08724.1  | QKEKEKLE-----      |
| AAC08727.1  | QKEKEKLE-----      |
| AAC08730.1  | QKEKEKLE-----      |
| NP_037086.1 | QKEKEKLEFMLVA H--- |
| AAC08715.1  | -----              |
| FRA2_CHICK  | QKEKEKLEFMLVA H--- |
| AAC59866.1  | QKEKDKLEFMLVA H--- |
| CAD56863.1  | RKEKDKLEFMLVA H--- |
| AAF01350.1  | QKEKERLEFVLA H---  |
| XP_218419.1 | QKEKERLEFVLA H---  |
| NP_032062.1 | QKEKERLEFVLA H---  |
| FOSB_HUMAN  | QKEKERLEFVLA H---  |
| NP_006723.1 | QKEKERLEFVLA H---  |
| CAD56864.1  | HKEKERLEFVLA H---  |
| A35847      | TNSKNQLEYLLATH---  |
| NP_733306.1 | TNSKNQLEYLLATH---  |
| NP_476587.1 | TNSKNQLEYLLATH---  |
| XP_318333.1 | QQEKDDLEFLLESH---  |
| NP_504557.1 | RNKLNSLKNYLETH---  |
| T31799      | RNKLNSLKNYLETH---  |
| CAE64529.1  | RNKLNSLKSYLENH---  |
| 1GD2        | RQKVRQLEEEELRIL--- |
| BAA87082.1  | RQKVRQLEEEELRIL--- |
| NP_593662.1 | RQKVRQLEEEELRIL--- |
| S15664      | RQKVRQLEEEELRIL--- |
| CAB91681.2  | RKKMEKMSNELNEY---  |
| XP_323224.1 | RKKMEKMSNELNEY---  |
| EAA62093.1  | KAQVERLQVELREY---  |
| XP_388976.1 | RAQVERMTAELNQY---  |
| EAA47389.1  | KRDLQKISTENEIL---  |
| XP_329184.1 | KQDLQKISTENEIL---  |
| EAA60905.1  | KREIARYSTENEIL---  |
| EAK95559.1  | KKQ-----           |
| EAK95697.1  | KKQ-----           |
| FCR3_CANAL  | KKQ-----           |
| NP_011854.1 | RKANTEINAENRLL---  |
| NP_982964.1 | KRENQVINNENRML---  |

|             |                    |
|-------------|--------------------|
| AAB29937.1  | LCSLKSLLESEITKY--- |
| NP_010711.1 | LCSLKSLLESEITKY--- |
| AAA34463.1  | LCSLKSLLESKITKY--- |
| AAD00802.1  | RAQVDVLKNELAKY---  |
| EAL02912.1  | RAQVDVLKNELAKY---  |
| CAA37827.1  | RDQLITLVNELKKY---  |
| NP_013707.1 | RDQLITLVNELKKY---  |
| CAA41536.1  | RDQLITLVNELKKY---  |
| CAA43195.1  | RDQLITLVNELKKY---  |
| AP1_KLULA   | RNQVTNLLSELKRY---  |
| NP_984291.1 | RGHVIALVRELRRW---  |
| AAC49426.1  | QNELQAKESENHAL---  |
| NP_012283.1 | QNELQAKESENHAL---  |
| EAA56950.1  | HGEYTKLR-----      |
| XP_323551.1 | QAEYEALK-----      |
| EAA48684.1  | SNENRQLKQLLAQN---  |
| EAK84283.1  | REALALMRAENRTL---  |
| EAK86097.1  | EEMIRRLGERQDL---   |
| NP_065505.1 | KDEIRILR-EWLNYP--- |
| AAC72896.1  | ESERKRISNKFAML---  |
| AAC72897.1  | ESERKRISNKFAML---  |
| A33111      | ESERKRISNKFAML---  |
| NP_732833.1 | ESERKRISNKFAML---  |
| NP_732834.1 | ESERKRISNKFAML---  |
| NP_732835.1 | ESERKRISNKFAML---  |
| T13936      | ESERKRISNKFAML---  |
| AAB59246.1  | ESERKRISNKFAML---  |
| XP_309091.1 | LSEHKKIRDKFSML---  |
| A49672      | LRSLRQMKQKVQSL---  |
| AAA20466.1  | LRSLRQMKQKVQSL---  |
| AAC40108.1  | LRSLRQMKQKVQSL---  |
| BAC03440.1  | LRSLRQMKQKVQSL---  |
| NP_032712.2 | LRSLRQMKQKVQSL---  |
| XP_340887.1 | LRSLRQMKQKVQSL---  |
| BAB23483.1  | LRSLRQMKQKVQSL---  |
| CAB46813.1  | LRSLRQMKQKVQSL---  |
| NFL1_MOUSE  | LRSLRQMKQKVQSL---  |
| NP_003195.1 | LRSLRQMKQKVQSL---  |
| AAC83235.1  | -----              |
| AAH59314.1  | LRSLRQMKQEVEHL---  |
| AAH49219.1  | NKAINIMKQKLHDL---  |
| AAH56142.1  | NKAINIMKQKLHDL---  |
| BAA76288.1  | NKAINIMKQKLHDL---  |
| AAF17228.1  | NKAINIMKQKLHDL---  |
| AAF61404.1  | NKAINIMKQKLHDL---  |
| NP_004280.4 | NKAINIMKQKLHDL---  |
| NP_035033.1 | SKAIDIMRQKLHGL---  |
| XP_231763.2 | NKAINIMRQKLYDL---  |
| A54692      | DRTLEVMRQQLTEL---  |
| AAA35612.1  | DRTLEVMRQQLTEL---  |
| NP_006154.1 | DRTLEVMRQQLTEL---  |
| NP_032711.2 | DRTLEVMRQQLAEL---  |
| S32537      | DRTLEVMRQQLAEL---  |
| XP_345884.1 | -----              |
| AAH45852.1  | SSNLKEMKQQLSTL---  |
| NP_878309.1 | SSNLKEMKQQLSTL---  |
| AAH61724.1  | DRNLHLLKRKLSTL---  |

|             |                    |
|-------------|--------------------|
| NP_113977.1 | DRNLHLLKRKLSTL---  |
| I49261      | DRNLHLLKRRLSTL---  |
| NP_035032.1 | DRNLHLLKRRLSTL---  |
| I59340      | DKSLHLLKKQLSTL---  |
| NP_006155.2 | DKSLHLLKKQLSTL---  |
| NP_990448.1 | DKSLRQMKKQLTTL---  |
| AAH43997.1  | NNSLSQLKKNLGNL---  |
| NP_778208.1 | QQNIAI IKRLSDL---  |
| AAB84100.1  | LSTLGETKQNL TGL--- |
| NP_031546.1 | LSTLGETKQNL TGL--- |
| BAA95505.1  | LSTLGETKQNL TGL--- |
| NP_001177.1 | LSTLGETKQNL TGL--- |
| XP_221712.2 | LSTLGETKQNL TGL--- |
| AAB84101.1  | -----              |
| AAH51242.1  | K-----             |
| NP_031547.1 | K-----             |
| AAK48898.1  | K-----             |
| NP_068585.1 | K-----             |
| 1404381A    | REQVAQLKQKVMNH---  |
| 1411298A    | REQVAQLKQKVMNH---  |
| NP_068607.1 | REQVAQLKQKVMNH---  |
| AAH09874.2  | REQVAQLKQKVMNH---  |
| TVHUJN      | REQVAQLKQKVMNH---  |
| AP1_CHICK   | REQVAQLKQKVMNH---  |
| AP1_COTJA   | REQVAQLKQKVMNH---  |
| AP1_PIG     | REQVAQLKQKVMNH---  |
| AP1_SERCA   | REQVAQLKQKVMNH---  |
| CAA31252.1  | REQVAQLKQKVMNH---  |
| NP_034721.1 | REQVAQLKQKVMNH---  |
| NP_002219.1 | REQVAQLKQKVMNH---  |
| 1FOSF       | REQVAQLKQKVM-----  |
| 1FOSH       | REQVAQLKQKVM-----  |
| TJUN_AVIS1  | REQVAQLKQKVMNH---  |
| AAA42416.1  | REQVAQLKQKVMNH---  |
| 1JNM        | REQVAQLKQKVMNH---  |
| 1A02J       | REQVAQL-----       |
| AAH41183.1  | REQVAQLKQKVMNH---  |
| CAB51636.1  | REQVAQLKQKVMNH---  |
| BAC77044.1  | REQVAQLKQKVMNH---  |
| CAD56856.1  | REQVAQLKQKVMNH---  |
| CAB51637.1  | REQVAQLKQKV-----   |
| NP_956281.1 | REQVAQLKQKVMNH---  |
| I51606      | REQVAQLKQKVMNH---  |
| CAD56859.1  | REQVAQLKQKVMNH---  |
| AAA39345.1  | REQVAHVKQKVL SH--- |
| AAK01362.1  | -----              |
| AAF97784.1  | REQVAQLK-----      |
| TVHUJD      | REQVAQLKQKVL SH--- |
| NP_620230.1 | REQVAQLKQKVL SH--- |
| NP_034722.1 | REQVAQLKQKVL SH--- |
| NP_005345.2 | REQVAQLKQKVL SH--- |
| JUND_CHICK  | REQVAQLKQKVL SH--- |
| CAD56861.1  | REQVAQLKQKVMNH---  |
| CAD56860.1  | REQVAQLKQKVL TH--- |
| AAL02138.1  | REQVCQLKQKVM EH--- |
| JUNB_RAT    | REQVAQLKQKVM TH--- |
| NP_032442.1 | REQVAQLKQKVM TH--- |

|             |                    |
|-------------|--------------------|
| BAC40473.1  | REQVAQLKQKVMTH---  |
| AAA74916.1  | REQVAQLKQKVMTH---  |
| NP_002220.1 | REQVAQLKQKVMTH---  |
| NP_068608.2 | REQVAQLKQKVMTH---  |
| AAH09465.1  | REQVAQLKQKVMTH---  |
| AAF75552.1  | -----              |
| AAH53154.1  | REQVAQLKQKVLRH---  |
| JUNB_CYPCA  | RDQVAQLKQKVLRH---  |
| AAH53234.1  | REQVAQLKQKVMTH---  |
| CAD56858.1  | REQVAQLKQKVMTH---  |
| CAD56857.1  | RDELALLKQKVMMDH--- |
| NP_476586.1 | KDHVAQLKQQVMEH---  |
| TVFFJD      | KDHVAHVKQQVMEH---  |
| XP_316420.1 | KQHIFQLKQQVIEH---  |
| CAE59807.1  | NRALANFRQMVERH---  |
| NP_495947.1 | NRALEHFRRTVEHH---  |
| A34785      | RNEVAQLKQLLLAH---  |
| AAA40394.1  | RNEVAQLKQLLLAH---  |
| AAH42210.1  | RNEVAQLKQLLLAH---  |
| B42026      | RNEVAQLKQLLLAH---  |
| A39429      | RNEVAQLKQLLLAH---  |
| S05380      | RNEVAQLKQLLLAH---  |
| AAB64016.1  | RNEVAQLKQLLLAH---  |
| AAB64017.1  | RNEVAQLKQLLLAH---  |
| ATF2_HUMAN  | RNEVAQLKQLLLAH---  |
| ATF2_MOUSE  | RNEVAQLKQLLLAH---  |
| BAC32623.1  | RNEVAQLKQLLLAH---  |
| C42026      | RNEVAQLKQLLLAH---  |
| A42026      | RNEVAQLKQLLLAH---  |
| AAA35951.1  | RNEVAQLKQLLLAH---  |
| NP_001871.2 | RNEVAQLKQLLLAH---  |
| NP_033845.1 | RNEVAQLKQLLLAH---  |
| NP_112280.1 | RNEVAQLKQLLLAH---  |
| BAC29065.1  | -----              |
| NP_990235.1 | RNEVAQLKQLLLAH---  |
| 1604249B    | RNEVAQLKQLLLAH---  |
| JC4028      | RNEVAQLKQLLLAH---  |
| ATF7_HUMAN  | RNEVAQLKQLLLAH---  |
| NP_006847.1 | RNEVAQLKQLLLAH---  |
| NP_666177.1 | RNEVAQLKQLLLAH---  |
| AAB29745.1  | RNEVAQLKQLLLAH---  |
| XP_235694.2 | RNEVAQLKQLLLAH---  |
| CRB5_MOUSE  | KNEVAQLKQLLLTH---  |
| I78877      | KNEVAQLKQLLLTH---  |
| NP_004895.1 | KNEVAQLKQLLLTH---  |
| NP_878901.1 | KNEVAQLKQLLLTH---  |
| NP_878902.1 | KNEVAQLKQLLLTH---  |
| AAH29022.1  | KNEVAQLKQLLLTH---  |
| NP_766316.1 | KNEVAQLKQLLLTH---  |
| AAH59400.1  | KNEVAQLKQLLLTH---  |
| NP_594500.1 | QQEAFRLKSQLLAH---  |
| NP_595707.1 | REEVICLKNQLLAH---  |
| XP_327898.1 | LSEVSDLKHQLMVH---  |
| EAA58248.1  | RDAlVVAKDQLLAH---  |
| XP_389177.1 | ---LEIEKELLHKQ---  |
| CAC18235.2  | REEVVNLKTLLLAH---  |
| XP_326838.1 | REEVVNLKTLLLAH---  |

|             |                      |
|-------------|----------------------|
| XP_390318.1 | REEVVNLKTLLLLAH---   |
| CAD21519.1  | REEVVNLKTLLLLAH---   |
| EAA57243.1  | REEVVNLKTLLLLAH---   |
| AAN75015.1  | REEIVNLKTLLLLAH---   |
| BAA12194.1  | REEIVSLKTLLIAH---    |
| NP_595652.1 | REEIVSLKTLLIAH---    |
| EAK94532.1  | RGAILLLLKE-----      |
| NP_014232.1 | -----                |
| NP_985572.1 | -----                |
| CAA09717.1  | T-----               |
| CAB63430.2  | RRELERVTALLTER---    |
| NP_497914.1 | RRELERVTALLTER---    |
| XP_382926.1 | TAEIYHLKTQLLQH---    |
| XP_387965.1 | QDELFKLKSQVLEH---    |
| XP_390615.1 | RETAYQLKLQLLRH---    |
| NP_010964.1 | EKLVQKMKKISRLH---    |
| NP_012228.1 | EKLISKFK-----        |
| NP_983992.1 | QKLVSKFKRFIELH---    |
| EAL00056.1  | EYTVELLKASIKSC---    |
| EAA60677.1  | HSQLLSLKDQILMH---    |
| NP_593039.1 | REEI IKLRTL VF AH--- |
| EAA50250.1  | MNELNSMKNHLM DH---   |
| EAA54021.1  | VDELNSMKNHVMDH---    |
| A49317      | KD-----              |
| AAF66158.2  | KD-----              |
| AAC60616.2  | KD-----              |
| AAO92340.1  | KD-----              |
| BAA03562.1  | KD-----              |
| BAA03567.1  | KD-----              |
| NP_037218.1 | KD-----              |
| NP_038526.1 | KD-----              |
| JX0307      | KD-----              |
| CAC34846.1  | KD-----              |
| CREM_CANFA  | KD-----              |
| S36101      | KD-----              |
| NP_989718.1 | KD-----              |
| NP_898831.1 | KD-----              |
| NP_898830.1 | KD-----              |
| NP_898829.1 | KD-----              |
| NP_874386.1 | KD-----              |
| NP_874392.1 | KD-----              |
| NP_874391.1 | KD-----              |
| NP_874390.1 | KD-----              |
| NP_874389.1 | KD-----              |
| AAC19383.1  | RD-----              |
| CREM_RAT    | KD-----              |
| I59276      | KD-----              |
| BAA83552.1  | KD-----              |
| 1DH3        | KD-----              |
| AAH41206.1  | KD-----              |
| AAQ24858.1  | KD-----              |
| CREB_BOVIN  | KD-----              |
| NP_112279.1 | KD-----              |
| NP_004370.1 | KD-----              |
| CAA63242.1  | KD-----              |
| NP_034082.1 | KD-----              |
| BAA36482.1  | KD-----              |

|             |                 |
|-------------|-----------------|
| NP_776710.1 | KD-----         |
| NP_598589.1 | KD-----         |
| NP_604391.1 | KD-----         |
| AAH67956.1  | KD-----         |
| NP_989781.1 | KD-----         |
| S20955      | KD-----         |
| S22298      | KD-----         |
| A35663      | KD-----         |
| A40120      | KD-----         |
| AAB64015.1  | KD-----         |
| NP_604392.1 | KD-----         |
| NP_957203.1 | KD-----         |
| BAC20140.1  | KE-----         |
| NP_031523.2 | KD-----         |
| XP_204339.1 | KD-----         |
| ATF1_MOUSE  | KD-----         |
| BAB26930.1  | KD-----         |
| CAC15058.1  | -----           |
| NP_005162.1 | KD-----         |
| XP_235657.1 | KD-----         |
| NP_956017.1 | KD-----         |
| B37944      | KD-----         |
| C37944      | KD-----         |
| JC5602      | KD-----         |
| JC6135      | KD-----         |
| BAA03564.1  | KD-----         |
| BAA03565.1  | KD-----         |
| CREM_HUMAN  | KD-----         |
| CREM_MOUSE  | KD-----         |
| NP_059030.1 | KD-----         |
| AAF68682.1  | KD-----         |
| NP_874393.1 | KD-----         |
| NP_874394.1 | KD-----         |
| NP_877570.1 | KD-----         |
| NP_877571.1 | KD-----         |
| NP_877572.1 | KD-----         |
| NP_877573.1 | KD-----         |
| NP_898883.1 | KD-----         |
| AAC60617.2  | KD-----         |
| NP_874387.1 | KD-----         |
| NP_874388.1 | KD-----         |
| NP_853549.1 | KD-----         |
| S26685      | KD-----         |
| JC2087      | KD-----         |
| CREB_CHLVR  | KD-----         |
| NP_996504.1 | KELYCQTKND----- |
| NP_996505.1 | KELYCQTKND----- |
| AAB35092.1  | KELYCQTKND----- |
| NP_996506.1 | KELYCQTKND----- |
| NP_996507.1 | KELYCQTKND----- |
| AAL92477.1  | KE-----         |
| T26807      | KE-----         |
| T26808      | KE-----         |
| NP_499509.2 | KE-----         |
| NP_499510.2 | KE-----         |
| CAD45607.2  | KE-----         |
| CAD56255.1  | KE-----         |

|             |                    |
|-------------|--------------------|
| CAB54382.2  | KE-----            |
| CAE67683.1  | KE-----            |
| CAD23072.1  | KQ-----            |
| CAD23073.1  | KQ-----            |
| CAD23074.1  | KQ-----            |
| CAD23075.1  | KQ-----            |
| CAD23076.1  | KQ-----            |
| CAD23077.1  | KQ-----            |
| CAD23078.1  | KQ-----            |
| CAD23079.1  | KQ-----            |
| CAD24865.1  | KQ-----            |
| CAD24866.1  | KQ-----            |
| CAD24867.1  | KQ-----            |
| CAD24868.1  | KQ-----            |
| CAD24869.1  | KQ-----            |
| CAD24870.1  | KQ-----            |
| CAD24871.1  | KQ-----            |
| CAD24872.1  | KQ-----            |
| AAR82739.1  | EETNANLLSQLHKL---  |
| NP_524087.3 | EETNANLLSQLHKL---  |
| CRBA_DROME  | EETNANLLSQLHKL---  |
| A44494      | EETNANLLSQLHKL---  |
| XP_308098.1 | EDCNQNLTQTELSKL--- |
| AAH14097.1  | ENANRTLLQQLQKL---  |
| NP_443086.1 | ENANRTLLQQLQKL---  |
| NP_036087.1 | ETANRTLLQQLQKL---  |
| XP_342467.1 | ETANRTLLQQLQKL---  |
| AAH16447.1  | ETANRTLLQQLQKL---  |
| BAC29155.1  | ENTNRTLLQQLQKL---  |
| BAC30798.1  | ENTNRTLLQQLQKL---  |
| AAS49162.1  | ENTNRTLLQQLQKL---  |
| NP_919047.1 | ENTNRTLLQQLQKL---  |
| XP_342661.1 | ENTNRTLLQQLQKL---  |
| CAD79343.1  | ENTNRTLLQQLQKL---  |
| CAD79344.1  | ENTNRTLLQQLQKL---  |
| NP_848776.1 | EDTNRTLLQQLQKL---  |
| NP_740985.2 | EASNRDLQQLHQY---   |
| NP_740986.2 | EASNRDLQQLHQY---   |
| NP_740987.2 | EASNRDLQQLHQY---   |
| T15656      | EASNRDLQQLHQY---   |
| CAE59060.1  | EASNRDLQQLHQY---   |
| AAG43527.1  | EEQNLSLLDQLRKL---  |
| AAH09402.1  | EEQNLSLLDQLRKL---  |
| AAD09210.1  | EEQNLSLLDQLRKL---  |
| AAC04325.1  | EEQNLSLLDQLRKL---  |
| NP_006359.3 | EEQNLSLLDQLRKL---  |
| AAB69652.1  | EEQNLSLLDQLRKL---  |
| NP_776711.1 | EEQNLSLLDQLRRL---  |
| AAC37645.1  | EEQNLSLLDQLRKL---  |
| BAB25173.1  | EEQNLSLLDQLRKL---  |
| NP_038525.1 | EEQNLSLLDQLRKL---  |
| XP_216492.2 | EEQNLSLLDQLRKL---  |
| NP_663340.1 | EKQNLSLLEQLKHL---  |
| XP_234917.2 | EKQNLSLLEQLKHL---  |
| BAC34115.1  | EKQNLSLLEQLKHL---  |
| NP_115996.1 | EKQNLSLLEQLKHL---  |
| AAH55664.1  | HKQNMSLIEQLRKL---  |

|             |                    |
|-------------|--------------------|
| AAO33070.1  | ERHNISLVAQLRQL---  |
| NP_570968.1 | ERHNISLVAQLRQL---  |
| BAB24315.1  | ERQNI FLMEQVRQL--- |
| NP_084356.1 | ERQNI FLMEQVRQL--- |
| CAE67216.1  | TSEKQSALSQIKKL---  |
| NP_491897.1 | SSENQSVISQLKKL---  |
| XP_321663.1 | QSQNHDLVSQMKRI---  |
| AAA97438.1  | RRRLEALLAENSEL---  |
| AAB47487.1  | RRRLEALLAENSEL---  |
| CAB89295.1  | RRRLEALLAENSEL---  |
| CAE83966.1  | RRRLEALLAENSEL---  |
| BAA91431.1  | RRRLEALLAENSEL---  |
| NP_004372.3 | RRRLEALLAENSEL---  |
| NP_059102.1 | RRRLEALLAENSGL---  |
| CAA66664.1  | RRRLEALLAENSEL---  |
| BAC29389.1  | KRQLDEVVSENQRL---  |
| XP_129579.2 | KRQLDEVVSENQRL---  |
| AAH43662.1  | KRQLDEVVSENQRL---  |
| BAA34722.1  | KRQLDEVVSENQRL---  |
| NP_031374.1 | KRQLDEVVSENQRL---  |
| XP_222871.2 | KRQLDQVVSENQRL---  |
| F34223      | KRQLDEVVSELRNS---  |
| NP_610159.1 | RDQI-----          |
| NP_995745.1 | RDQI-----          |
| EAA51693.1  | MEENKRLQDLTRML---  |
| XP_381731.1 | LDENKRLTDLTRML---  |
| EAA65980.1  | CDENARLTDLVRQL---  |
| EAK87242.1  | SVENKALKDEVKTI---  |
| AAO51565.1  | -----              |
| AAA33489.1  | NQKYN-----         |
| CAD36195.1  | NQKYN-----         |
| A34800      | NQKYN-----         |
| S06022      | NQKYN-----         |
| AAO17553.1  | NQKYN-----         |
| AAO17558.1  | NQKYN-----         |
| AAO17559.1  | NQKYN-----         |
| AAO17561.1  | NQKYN-----         |
| AAO17556.1  | NQKYN-----         |
| AAO17567.1  | NQKYN-----         |
| AAO17564.1  | NQKYN-----         |
| AAO17566.1  | NQKYN-----         |
| AAO17550.1  | NHKYN-----         |
| AAO17551.1  | NHKYN-----         |
| AAO17554.1  | NQKYN-----         |
| AAO17557.1  | NQKYN-----         |
| AAO17555.1  | NQKYN-----         |
| AAO17562.1  | NQKYN-----         |
| AAO17563.1  | NQKYN-----         |
| AAO17568.1  | NQKYN-----         |
| AAO17560.1  | NQKYN-----         |
| AAO17569.1  | NQKYN-----         |
| AAO17552.1  | NHKYN-----         |
| S42529      | NQKYN-----         |
| S56073      | NQKYN-----         |
| S42493      | NQKYNE-----        |
| AAM53650.1  | NQK-----           |
| OP2_MAIZE   | NQKYN-----         |

|             |                    |
|-------------|--------------------|
| AAB34363.1  | -----              |
| CAD36198.1  | -----              |
| AAL10017.1  | NQKYN-----         |
| AAL77201.1  | NQKYN-----         |
| NP_909959.1 | NQKYN-----         |
| T03605      | NQKYN-----         |
| BAA36492.1  | NQKYN-----         |
| T04477      | NQKYN-----         |
| JQ2147      | NQKFNE-----        |
| JQ2148      | NQKFNE-----        |
| JC5175      | NQKFNE-----        |
| BAB39173.1  | NQK-----           |
| CAA71795.1  | S-----             |
| T06767      | S-----             |
| AAD21199.1  | TQHLYLNVEAENSIL--- |
| AAN61914.1  | TQHLYLNVEAENSIL--- |
| AAK92213.1  | TQHLYLNVEAENSIL--- |
| AAN03468.1  | TQQYLSVEAENSVL---  |
| CAA68078.1  | TQHLYLTVEAENSVL--- |
| NP_195185.1 | TQHLYLTVEAENSVL--- |
| D96784      | TQHYVTIEAENDIL---  |
| NP_177672.2 | TQHYVTIEAENDIL---  |
| CAC00658.1  | TQQFVKVEAENSVL---  |
| AAG17474.1  | SQLYMKIQAENSVL---  |
| NP_179408.1 | SQLYMKIQAENSVL---  |
| AAK92214.1  | GRNYLTLDAENNVL---  |
| BAB13719.1  | GRNYLTLDAENNVL---  |
| AAD55394.1  | GRNFHTLDAENNVL---  |
| BAA34938.1  | ERNYRAMDAENNVL---  |
| T02016      | ERNYRAMDAENNVL---  |
| T17108      | -----              |
| T17110      | -----              |
| AAK92215.1  | TER-----           |
| CAC00657.1  | -----              |
| NP_191801.1 | SKKYIEMESKNNVL---  |
| AAM62538.1  | LYHCQRTKMENDRL---  |
| NP_566925.1 | LYHCQRTKMENDRL---  |
| T46042      | -----              |
| NP_176162.1 | -----              |
| NP_179870.1 | -----              |
| NP_195487.1 | LHQLQRVNSDNNRL---  |
| AAR87318.1  | AR-----            |
| BAC79506.1  | ARRALAVRGANARH---  |
| AAG46064.1  | -----              |
| BAB59117.1  | AGELSKVDGENAVL---  |
| S35193      | AGELSKVDGENAVL---  |
| S58692      | ERDL-----          |
| JQ0984      | -----              |
| OCS1_MAIZE  | ASQYTRVEQENTVL---  |
| CAE92374.1  | TSQFVRVDQENTVL---  |
| NP_918198.1 | -----              |
| AAK01953.1  | SDSHDRVLQKNTRL---  |
| AAK25822.1  | SDSHDRVLQENTRL---  |
| NP_172817.2 | SES-----           |
| NP_178489.1 | SE-----            |
| NP_189674.1 | SESHDKVLQENAQL---  |
| NP_197087.1 | SDNNDLVIQENSSL---  |

|             |                   |
|-------------|-------------------|
| AAO22653.1  | LESQEKVIEENVQL--- |
| NP_198696.1 | LESQEKVIEENVQL--- |
| NP_177054.1 | RECYEKVIEENMKL--- |
| BAD09328.1  | LRGCADVRRENSRL--- |
| BAD16405.1  | ISKHARIVRENSQL--- |
| BAB10103.1  | LESNHQILQENSQ---  |
| NP_200891.1 | LESNHQILQENSQ---  |
| NP_850791.1 | LEYNHQILQENSQ---  |
| T50499      | LEYNHQILQENSQ---  |
| NP_568508.2 | TQTFNDASVENRVL--- |
| NP_851088.1 | TQTFNDASVENRVL--- |
| CAC79656.1  | TQTFNDASVENRVL--- |
| AAG25729.1  | -----             |
| AAF67360.1  | -----             |
| AAL27150.1  | SQKYNE-----       |
| T07154      | SQKYNE-----       |
| CPR2_PETCR  | SQRYN-----        |
| S16321      | SQRYN-----        |
| CAA04640.1  | NQQ-----          |
| T03991      | NQQ-----          |
| BAB39174.1  | NQQ-----          |
| CAA04641.1  | NQQ-----          |
| T03990      | NQQ-----          |
| BAB39175.1  | SQQFN-----        |
| CAC79658.1  | NHKYD-----        |
| NP_567003.2 | NHKYD-----        |
| AAK96836.1  | -----             |
| NP_192173.1 | NHKYDE-----       |
| NP_849290.1 | NHKYDE-----       |
| AAL87327.1  | NHKYDE-----       |
| NP_568457.1 | -----             |
| AAF65459.1  | HQKRLKELKEMVVPV-- |
| T04353      | HQKRLKELKEMVVPV-- |
| NP_915651.1 | -----             |
| AAO72626.1  | -----             |
| AAM63460.1  | RKE-----          |
| NP_199221.1 | RKE-----          |
| NP_171893.1 | TKE-----          |
| AAK19600.1  | EKK-----          |
| NP_566870.1 | EKK-----          |
| T48926      | -----             |
| AAM75354.1  | -----             |
| AAM75355.1  | -----             |
| G84778      | ERK-----          |
| NP_565840.1 | ERK-----          |
| T12621      | ERK-----          |
| NP_915581.1 | -----             |
| AAK19601.1  | -----             |
| NP_191244.1 | -----             |
| NP_565948.1 | -----             |
| T02112      | -----             |
| CAD12766.1  | -----             |
| BAC42739.1  | -----             |
| T12622      | -----             |
| NP_915950.1 | -----             |
| T12585      | -----             |
| BAC79602.1  | -----             |

|             |                    |
|-------------|--------------------|
| BAC65865.1  | K-----             |
| BAC65866.1  | K-----             |
| BAC65867.1  | K-----             |
| CAD29860.1  | K-----             |
| CAD29861.1  | K-----             |
| AAK39132.1  | ME-----            |
| CAB85632.1  | ME-----            |
| AAL86016.1  | ME-----            |
| BAD09357.1  | ME-----            |
| BAA83740.1  | ME-----            |
| AAS20434.1  | -----              |
| NP_973981.1 | MEMQKNQETEMRNL---  |
| AAO06115.1  | LK-----            |
| BAB02453.1  | -----              |
| NP_566629.1 | -----              |
| NP_564551.1 | MK-----            |
| NP_567949.1 | -----              |
| NP_849490.1 | ASSLSQLR-----      |
| BAB61098.1  | -----              |
| BAC79182.1  | -----              |
| NP_199105.1 | RKR-----           |
| AAL79735.1  | -----              |
| BAD08955.1  | K-----             |
| AAA68429.1  | KKDCKTMETENKQL---  |
| S50821      | KKDCKTMETENKQL---  |
| A38486      | KKDCKTMETENKQL---  |
| BAA02303.2  | KKDCKTMETENKKL---  |
| EMP1_WHEAT  | KKDCKTMETENKKL---  |
| T05716      | KEDCKTMEVENKQL---  |
| S50822      | KK-----            |
| BAC83673.1  | KKACEDMEAENTRL---  |
| BAD11353.1  | KKACEDMEAENTRL---  |
| CAB62402.1  | KKACQDMEAENSRL---  |
| CAE53907.1  | KKACEDMEAQNAQL---  |
| T06512      | KKACEDMEAQNARL---  |
| NP_182150.1 | NEKSDKLRGANATL---  |
| S20885      | NEKSDKLRGANATL---  |
| AAA90947.1  | NEKSDKLRGANATL---  |
| NP_850449.1 | NEKSDKLRGANATL---  |
| T07882      | NEKSNLNRGANATL---  |
| T07887      | NEKSNLNRGANATL---  |
| T09120      | VENSQKLRLAAL---    |
| AAD42937.1  | TENSEHLRHESALL---  |
| NP_917345.1 | TESSKKLRLAAL---    |
| T03373      | TESSKKLRLAAL---    |
| T02084      | TESSEKLRLAAL---    |
| T07150      | TEGSEQMRMENSAL---  |
| T07151      | TEGSEQMRMENSAL---  |
| T10985      | TEGSEQMRMENSAL---  |
| CAA42915.1  | MENSEKCLKLENAAL--- |
| TAF1_TOBAC  | MENSEKCLKLENAAL--- |
| S53020      | MENSEKCLKLENAAL--- |
| S53021      | TENSAKCLKLENSAL--- |
| CPR1_PETCR  | TLTAEKLTNDNSRL---  |
| S16322      | TLTAEKLTNDNSRL---  |
| NP_192021.1 | NNESEKLRLENEAI---  |
| T01728      | NNESEKLRLENEAI---  |

|             |                      |
|-------------|----------------------|
| AAM62869.1  | NNESEKLRLNEAI ---    |
| S66310      | NDESEKLRLNQAL ---    |
| T10472      | NDESEKLRLNEAL ---    |
| T10244      | NDESEKLR - - - - -   |
| A54415      | QEKCDNLTSENTSL ---   |
| AAL77202.1  | QEKCNLSLSENTTL ---   |
| NP_195391.1 | SSECDKLKSENNSI ---   |
| NP_849510.1 | SSECDKLKSENNSI ---   |
| S20883      | SSECDKLKSENNSI ---   |
| AAB25116.1  | SSECDKLKSE - - - - - |
| AAK96765.1  | SSECDKLKSENNSI ---   |
| S51307      | SGECEKLTENNTI ---    |
| S66312      | SGECEKLTQNSSI ---    |
| AAK14790.1  | SEECEKLTSENNSI ---   |
| CAC00656.1  | SEECEKVTSENNTI ---   |
| S42393      | SEECEKLTSENCLI ---   |
| S42392      | SEECEKLTSENNSI ---   |
| T07148      | SEECKKLTSENDSI ---   |
| T11751      | SEECEKLTSENSSI ---   |
| CPR3_PETCR  | SEACAEVTSENHSI ---   |
| AAD42938.1  | RSEYEQLLAQNAAL ---   |
| AAK39131.1  | RSDYEQLLSENTAL ---   |
| T14909      | RTEYEKIVAQNEVL ---   |
| T14911      | RSEYEK - - - - -     |
| AAK39130.1  | RSEFEQLRSENASL ---   |
| T12092      | KSE - - - - -        |
| S42394      | RSEHDQLASQNASL ---   |
| AAO06116.1  | RKEYDELLSKNSSL ---   |
| T03241      | RKEYDELLSKNSSL ---   |
| BAD07975.1  | KKEYEALLSHNASL ---   |
| HBPA_WHEAT  | KKEYEELLSKNTSL ---   |
| G84769      | KSQCEELTTENTSL ---   |
| NP_850248.2 | KSQCEELTTENTSL ---   |
| H86445      | KSQYEELLAENSSL ---   |
| NP_174494.2 | KSQYEELLAENSSL ---   |
| AAF79444.1  | LKEFQSLETINKHL ---   |
| NP_173381.1 | LKEFQSLETINKHL ---   |
| T03242      | MQEYLSLKETNKQL ---   |
| T03245      | MQEYLSLKETNKQL ---   |
| AAC04862.1  | QRD TTGLTTENKEL ---  |
| BAA97100.1  | QRD NSGLTNENKEL ---  |
| AAL87668.1  | QRD TSGLTAENREL ---  |
| AAO72544.1  | QRD TSGLTAENREL ---  |
| AAM62924.1  | QRD TNGLGVENNEL ---  |
| NP_172097.1 | QRD TNGLGVENNEL ---  |
| NP_180695.1 | QRD TNGLTVENNEL ---  |
| T03580      | QRD TSGLTTENSEL ---  |
| CAD41260.1  | QRD TTGLTSENSDL ---  |
| AAR28765.1  | QRD TTGLSAENAEL ---  |
| BAC84100.1  | QRD TTGLSAENAEL ---  |
| NP_181594.1 | QRD TTGLSSENTEL ---  |
| T52624      | QRD TTGLSSENTEL ---  |
| D86203      | QRD TNGLANENTEL ---  |
| NP_172170.1 | QRD TNGLANENTEL ---  |
| CAD12036.1  | QRD TNGLANENTEL ---  |
| NP_850168.1 | QVSFDSL - - - - -    |
| AAF37279.4  | QRGTSELNTENKHL ---   |

|             |                    |
|-------------|--------------------|
| NP_564486.1 | QRGTSELNTENKHL---  |
| AAM63070.1  | QRGTSELNTENKHL---  |
| AAL87314.1  | QRDMMGLTNQNNEL---  |
| NP_195601.1 | QRDMMGLTNQNNEL---  |
| NP_849520.1 | QRDMMGLTNQNNEL---  |
| BAA76425.1  | QRDSVGLTNQNSEL---  |
| NP_179719.1 | QRDSMGLTNQNSEL---  |
| NP_973502.1 | QRDSMGLTNQNSEL---  |
| NP_912474.1 | QRDSAGLATQNNEL---  |
| NP_922490.1 | QRDSSGMATQNNEL---  |
| BAD09726.1  | QRDSTGLATQNNEL---  |
| AAL78371.1  | RR-----            |
| CAA05898.1  | QKNFVEISSLNSEL---  |
| S52203      | QKNFVEISSLNSEL---  |
| CAA52015.1  | QKNFVEISSLNSEL---  |
| CAD39525.2  | QRNNNELVSQLNSEL--- |
| AAL69473.1  | DHQ-----           |
| NP_850369.1 | DHQ-----           |
| NP_191371.1 | DHQ-----           |
| NP_913295.1 | DHQRSLL-----       |
| NP_178948.1 | ENDKTMNNNEKKEI---  |
| NP_178956.1 | END-----           |
| NP_565355.1 | EKDKTILMNEKKEI---  |
| NP_850010.1 | EKE-----           |
| NP_199756.1 | KQRLDSVETENAGL---  |
| AAM96961.1  | MAENATLRQQL-----   |
| NP_565946.1 | MAENATLRQQL-----   |
| T00759      | MAENATLRQQL-----   |
| TGAB_TOBAC  | IAENATLKTQ-----    |
| NP_191225.1 | VAENVTLRQQMGTR---  |
| AAO00862.1  | MAENVALRQQMAVA---  |
| NP_187691.1 | MAENVALRQQMAVA---  |
| NP_913739.1 | TAENAALKQQL-----   |
| AAO51139.1  | KEENKALKKQLYSL---  |
| NP_174998.1 | VAENQSLR-----      |
| AAO22523.1  | QNENQML-----       |
| NP_568246.1 | QNENQMLRHILKNT---  |
| CAB57979.1  | QNENQMLRHILKNT---  |
| T08591      | QNENQMLRQILKNT---  |
| T08592      | QNENQMLRQILKNT---  |
| BAC20318.1  | QNENQMLRQILKNT---  |
| T12093      | QNENQMLRQILKNT---  |
| BAD15505.1  | QNENQMLRQILKNT---  |
| NP_916476.1 | QNENNTLRQILKNT---  |
| NP_850604.1 | TNENTMLRKMLINT---  |
| NP_850605.1 | TNENTMLRKMLINT---  |
| BAB02051.1  | TNENTMLQ-----      |
| CAC88375.1  | EAENNRLSQQVAQL---  |
| EAA66464.1  | EAENNRLSQQVAQL---  |
| AAQ73495.1  | EAENNRLNQQVAQL---  |
| CAC88374.1  | QKTNLILVEELNRFR--  |
| XP_329046.1 | -----              |
| XP_391799.1 | QEANAKLMSELEQIR--  |
| EAA47880.1  | QKLTQTMQELQ-----   |
| EAK84647.1  | KAENTLLRQQREQ----- |
| NP_034887.1 | RLELDALRSKYEAL---  |
| NP_663706.1 | RLELDALRSKYEAL---  |

|             |                    |
|-------------|--------------------|
| NP_002351.1 | RLELDALRSKYEAL---  |
| A49391      | RLELDALRSKYEAL---  |
| AAH60834.1  | RLELDALRSKYEAL---  |
| NP_990087.1 | KLELDALRSKYEAL---  |
| BAB41097.1  | KLELDALRSKYEAL---  |
| NP_002350.1 | KLELDALRSKYEAL---  |
| NP_034886.1 | KLELDALRSKYEAL---  |
| MAFG_CHICK  | KMELDALRSKYEAL---  |
| AAH67680.1  | KVELDALRSKYEAL---  |
| NP_034885.1 | RLELDALRGKCEAL---  |
| NP_036455.1 | RLELDALRGKCEAL---  |
| XP_345858.1 | RLELDALRGKCEAL---  |
| AAP36863.1  | RLELDALRGKCEAL---  |
| JC7112      | RLELDALRGKCEAL---  |
| NP_990088.1 | RLELDTLRGKYEAL---  |
| NP_956630.1 | RRELEGLGARLAAL---  |
| NP_611500.1 | RREVSNWKNKYKAL---  |
| XP_311544.1 | QEENDSLRNKYEAL---  |
| A56235      | ARERDAYKCLKCEKL--- |
| CAA65360.1  | ARERDAYKCLKCEKL--- |
| NP_005452.2 | ARERDAYKVKCEKL---  |
| NP_034788.1 | ARERDAYKVKCEKL---  |
| NP_062189.1 | ARERDAYKVKCEKL---  |
| AAD30106.1  | ARERDAYKVKCEKL---  |
| AAF08316.1  | ARERDAYKIKCEKL---  |
| AAC18821.1  | ARERDAYKCLKCEKL--- |
| NP_571090.1 | ARERDAYKCLKCEKL--- |
| AAH62823.1  | VRERDAYKCLKCERL--- |
| NP_571917.1 | VRERDAYKCLKCERL--- |
| AAA42377.1  | VRERDAYKEKYEKL---  |
| BAA05935.1  | VRERDAYKEKYEKL---  |
| TMAF_AVIS4  | VRERDAYKEKYEKL---  |
| BAA05936.1  | VRERDAYKEKYEKL---  |
| BAA05937.1  | VRERDAYKEKYEKL---  |
| MAF_MOUSE   | VRERDAYKEKYEKL---  |
| NP_005351.2 | VRERDAYKEKYEKL---  |
| NP_062191.1 | VRERDAYKEKYEKL---  |
| AAC27037.1  | VRERDAYKEKYEKL---  |
| AAH65941.1  | VRERDAYKEKYEKL---  |
| BAB21103.2  | VRERDAYKEKYEKL---  |
| AAC60377.1  | AKERDLYKEKYEKL---  |
| AAF71239.1  | AKERDLYKEKYEKL---  |
| AAN75524.1  | AKERDLYKEKYEKL---  |
| NP_990356.1 | AKERDLYKEKYEKL---  |
| NP_919331.1 | AKERDLYKEKYEKL---  |
| XP_345847.1 | AKERDLYKEKYEKL---  |
| NP_963883.1 | AKERDLYKEKYEKL---  |
| BAB21104.2  | IKERDLYKEKYEKL---  |
| JC7572      | IKERDLYKEKYEKL---  |
| AAF08317.2  | TRERDGWRARYEKL---  |
| NP_006168.1 | ARERDLYKARCDRL---  |
| XP_224189.1 | ARERDLYKARCDRL---  |
| NP_032762.1 | ARERDLYKARCDRL---  |
| AAP36333.1  | ARERDLYKARCDRL---  |
| BAC31838.1  | ARERDLYRARCDRL---  |
| AAQ72813.1  | EKERDDYKAKFERL---  |
| XP_319177.1 | KQERDELIQTLMH---   |

|             |                   |
|-------------|-------------------|
| EAA50999.1  | RLTLQQMHTERSQM--- |
| EAA64243.1  | R-----            |
| XP_324679.1 | QRDMDQLLREKQSY--- |
| XP_380691.1 | RGKLEQM-----      |
| A84544      | -----             |
| NP_179268.2 | -----             |
| NP_567974.1 | ATLEAEVSRLKCLLVDL |
| T05774      | ATLEAEVSRLKCLLVDL |
| AAM63358.1  | ATLEAEVSRLKCLLVDL |
| NP_190764.2 | EMVETELIRLRALLVEM |
| NP_850680.1 | EMVETELIRLRALLVEM |
| T49075      | EMVETELIRLRALLVEM |
| NP_915829.1 | -----             |
| AAP06202.1  | KHIEHQLRRI-----   |
| AAB31250.2  | -----             |
| T07033      | -----             |
| TGAA_TOBAC  | -----             |
| AAB31251.2  | -----             |
| S49583      | -----             |
| AAK71287.1  | -----             |
| S17715      | -----             |
| AAK84888.1  | -----             |
| T08813      | -----             |
| JQ1678      | -----             |
| NP_201324.1 | -----             |
| AAM64610.1  | -----             |
| NP_196565.1 | -----             |
| S48121      | -----             |
| CAD41728.3  | -----             |
| AAF17682.1  | -----             |
| NP_565162.1 | -----             |
| AAM64781.1  | -----             |
| NP_564156.1 | -----             |
| AAK84889.1  | -----             |
| AAK84890.1  | -----             |
| JC1230      | -----             |
| AAF06696.1  | -----             |
| BAA06486.1  | -----             |
| HBPB_WHEAT  | -----             |
| NP_974293.1 | -----             |
| S48122      | -----             |
| NP_566415.3 | -----             |
| NP_196312.1 | -----             |
| NP_196313.1 | -----             |
| BAB03134.1  | -----             |
| BAB72063.1  | -----             |
| AAC37470.1  | -----             |
| TG21_TOBAC  | -----             |
| AAF22906.1  | -----             |
| NP_563810.2 | -----             |
| BAB11142.1  | -----             |
| NP_850784.1 | -----             |
| CAC40649.1  | -----             |
| BAB72064.1  | -----             |
| NP_915902.1 | -----             |
| HBB2_WHEAT  | -----             |
| S33222      | -----             |

|             |                    |
|-------------|--------------------|
| S33223      | -----              |
| BAB72062.1  | -----              |
| NP_910392.1 | -----              |
| BAB72061.1  | -----              |
| BAD03039.1  | -----              |
| AAD19660.1  | -----              |
| NP_177031.1 | -----              |
| AAO45628.1  | -----              |
| T01415      | -----              |
| AAA87944.1  | TREVETTRRALIDR---  |
| NP_077048.1 | TREVETTRRALIDR---  |
| AAB27103.1  | TREVEATRRALIDR---  |
| CAA63088.1  | TREVEATRRALIDR---  |
| JC1169      | TREVEATRRALIDR---  |
| NP_004074.2 | TREVEATRRALIDR---  |
| AAP36688.1  | TREVEATRRALIDR---  |
| GA15_MOUSE  | TREVETTRRALIDR---  |
| NP_031863.2 | TREVETTRRALIDR---  |
| GA15_CRILO  | TREVEATR-----      |
| AAR97288.1  | KK-----            |
| CAE57240.1  | KQRLAYYEPETPTY---  |
| NP_510094.1 | KQRL-----          |
| EAA38700.1  | QK-----            |
| JC7300      | REKTHGLVVENQEL---  |
| NP_038870.2 | REKTHGLVVENQEL---  |
| AAH08153.1  | REKTHGLVVENQEL---  |
| AAL60202.1  | REKTHGLVVENQEL---  |
| BAB82982.1  | REKTHGLVVENQEL---  |
| XBP1_HUMAN  | REKTHGLVVENQEL---  |
| AAH15709.1  | REKTHGLVVENQEL---  |
| NP_005071.2 | REKTHGLVVENQEL---  |
| XP_214067.1 | REKTHGLVIENQEL---  |
| AAH43852.1  | REKSHGLLTENQEL---  |
| AAK48906.1  | REKSHGLLTENQEL---  |
| AAH67321.1  | REKSHSLLTENQEL---  |
| AAL05527.1  | RDKTSDLLSENEEL---  |
| AAL69332.1  | RDKTSDLLSENEEL---  |
| NP_571949.1 | RDKTSDLLSENEEL---  |
| AAL75953.1  | RDKTSDLLSENEEL---  |
| NP_524722.2 | QAINESLLAKNHKL---  |
| NP_726032.2 | QAINESLLAKNHKL---  |
| XP_310116.1 | DTEKSSMYDKYLDL---  |
| NP_871653.1 | RRQNKNL-----       |
| T24253      | RRQNKNL-----       |
| NP_497840.2 | RRQNKNL-----       |
| CAE72866.1  | RRQNEKFQSRQOQQO--- |
| A44083      | RTECTSLRVQLACH---  |
| NP_057830.1 | RTECTSLRVQLACH---  |
| AAG14255.1  | RTECTSLRVQLACH---  |
| AAS78588.1  | RTECTSLRVQLACH---  |
| AAR13326.1  | RTECTSLRVQLARH---  |
| AAR13328.1  | RTECTSLRVQLARH---  |
| AAR13330.1  | RTECTSLRVQLARH---  |
| AAR13331.1  | RTECTSLRVQLARH---  |
| BAA93716.1  | RTECTSLRVQLACH---  |
| BAC02923.1  | RTECTSLRVQLACH---  |
| BAC02924.1  | RTECTSLRVQLACH---  |

|             |                   |
|-------------|-------------------|
| AAC54628.1  | RTECTSLRAQLACH--- |
| BAC57989.1  | RTECTSLRAQLACH--- |
| AAP06937.1  | RTECTSLRAQLACH--- |
| AAG29915.1  | RTECTSLRVQLACH--- |
| AAM00002.1  | RTECTSLRVQLACH--- |
| AAR13320.1  | RTECTSLRVQLACH--- |
| AAP06939.1  | RTECTSLRVQLACH--- |
| AAP06940.1  | RTECTSLRVQLACH--- |
| AAP06941.1  | RTECTSLRVQLACH--- |
| AAP06942.1  | RTECTSLRVQLACH--- |
| AAP06943.1  | RTECTSLRVQLACH--- |
| AAP06944.1  | RTECTSLRVQLACH--- |
| AAL99997.1  | RTECTSLRAQLACH--- |
| AAM00005.1  | RTECTSLRAQLACH--- |
| AAG27971.1  | RTECTSLRVQLACH--- |
| BAC57991.1  | RTECTSLRVQLACH--- |
| AAL99996.1  | RTECTSLRAQLACH--- |
| AAR13322.1  | RTECTSLRAQLACH--- |
| AAL99998.1  | RTECTSLRAQLACH--- |
| AAL99999.1  | RTECTSLRAQLACH--- |
| AAM00001.1  | RTECTSLRAQLACH--- |
| AAM00003.1  | RTECTSLRAQLACH--- |
| AAM00004.1  | RTECTSLRAQLACH--- |
| AAR13321.1  | RTECTSLRVQLARH--- |
| AAR13324.1  | RTECTSLRVQLARH--- |
| AAS78589.1  | RTECTSLRVQLACH--- |
| AAP06945.1  | -----             |
| AAP06946.1  | -----             |
| AAC54629.1  | -----             |
| BAB32053.1  | KEELRHLSEVLKEH--- |
| NP_068637.1 | KEELRHLTEALKEH--- |
| NP_061134.1 | TEELKHLTEALKEH--- |
| XP_355268.1 | -----             |
| NP_006390.1 | TEELKYFTSVLNSH--- |
| NP_058047.1 | TEELKYFTSVLSSH--- |
| NP_083243.1 | QTEL-----         |
| NP_612465.3 | QAEL-----         |
| AAA53043.1  | AKEIQYLKDLIEEV--- |
| XP_139474.1 | AKEIQYLKDLIEEV--- |
| ATF4_MOUSE  | AKEIQYLKDLIEEV--- |
| BAA25314.1  | AKEIQYLKDLIEEV--- |
| BAC25014.1  | AKEIQYLKDLIEEV--- |
| NP_033846.1 | AKEIQYLKDLIEEV--- |
| NP_077379.1 | AKEIQYLKDLIEEV--- |
| AAP36818.1  | AKEIQYLKDLIEEV--- |
| ATF4_HUMAN  | AKEIQYLKDLIEEV--- |
| NP_877962.1 | AKEIQYLKDLIEEV--- |
| XP_290732.2 | AKEIQYLKDLIEEE--- |
| 1CI6A       | AKEIQYLKDLIEEV--- |
| NP_990211.1 | SKEIQYLKDLIEEV--- |
| AAH59971.1  | TKEIQYLKDLIAEV--- |
| AAH67714.1  | SREIQYLRDLLEEM--- |
| AAS57931.1  | SREIKYLKDLMEEV--- |
| AAD28370.1  | EREIQYVKDLLIEV--- |
| AAH05174.1  | EREIQYVKDLLIEV--- |
| AAP36242.1  | EREIQYVKDLLIEV--- |
| NP_036200.2 | EREIQYVKDLLIEV--- |

|             |                   |
|-------------|-------------------|
| AAK00584.1  | EREIQYVKDLLIEV--- |
| AAM92263.1  | EREIQYVKDLLIEV--- |
| BAA25313.1  | EREIQYVKDLLIEV--- |
| NP_109618.1 | EREIQYVKDLLIEV--- |
| NP_758839.2 | EREIQYVKDLLIEV--- |
| AAA92437.1  | QREIKYMKNLMEDV--- |
| BAC21159.1  | QREIKYMKNLMEDV--- |
| AAG45935.1  | QREIRYLKALMRDL--- |
| XP_319661.1 | GREISCIKKLMREF--- |
| AAF71698.1  | HNEMRYLRQLIREF--- |
| NP_524897.1 | HNEMRYLRQLIREF--- |
| NP_724333.1 | HNEMRYLRQLIREF--- |
| NP_506515.1 | KREINSMKKELRKM--- |
| NP_872160.1 | KREINSMKKELRKM--- |
| CAE61002.1  | KREINLLKKDLRRL--- |
| CAE63232.1  | EREVRYFKKFMQEM--- |
| NP_510456.1 | EREIRYFKKFMTEM--- |
| CAE73317.1  | EREISQLKQ-----    |
| NP_496919.1 | EREIDRLKQ-----    |
| CAE58480.1  | EKEVAEARQAFLOK--- |
| NP_500318.1 | EKEVAEMRQAFLOK--- |
| AAM00250.1  | EGETEVLRSVMKDK--- |
| CAC14775.1  | ETEAGVLRGLVGK---- |
| EAA46874.1  | DEEIRILREML-----  |
| XP_328761.1 | DAEVGMLREMLAMA--- |
| EAA54005.1  | EAETATLRDLLVMA--- |
| NP_726489.1 | EKELQQHRS-----    |
| CAE64642.1  | LSQVEEQMRMLEMM--- |
| NP_506292.1 | LSQVEEQMRMLENI--- |
| 1CI6B       | SRELSTLRNLFKQL--- |
| AAQ72476.1  | SRELSTLRNLFKQL--- |
| AAA09274.1  | SRELSTLRNLFKQL--- |
| NP_034013.1 | SRELSTLRNLFKQL--- |
| AAA40972.1  | SRELSTLRNLFKQL--- |
| CEBB_RAT    | SRELSTLRNLFKQL--- |
| BAA25315.1  | SRELSTLRNLFKQL--- |
| NP_077039.2 | SRELSTLRNLFKQL--- |
| CAA43179.1  | SRELSTLRNLFKQL--- |
| 1HJB        | SRELSTLRNLFKQL--- |
| S12788      | SRELSTLRNLFKQL--- |
| 1IO4        | SRELSTLRNLFKQL--- |
| AAH05132.2  | SRELSTLRNLFKQL--- |
| NP_005185.2 | SRELSTLRNLFKQL--- |
| 1H89        | SRELSTLRNLFKQL--- |
| NP_990584.1 | SRELSTLRNLFKQL--- |
| BAB40971.1  | SRELSTLRNLFKQL--- |
| AAD19576.1  | SRELSTLRNLFK----- |
| BAA09637.1  | SRE-----          |
| S66246      | SRE-----          |
| NP_789745.1 | SREVSTLRNLFKTL--- |
| CAA76309.1  | SRELGTLRNLFKQV--- |
| AAH62523.1  | SRELATLRNLLSAT--- |
| NP_571959.2 | SRELATLRNLLSAT--- |
| AAL54865.1  | SRELATLRNLLSAT--- |
| AAN41660.1  | SRELATLRNLLSAT--- |
| AAS93421.1  | SRELSTLRNLLSAT--- |
| CAA72289.1  | SRELDTLRGIFRQL--- |

|             |                   |
|-------------|-------------------|
| XP_133376.1 | SRELDTLRGIFRQL--- |
| NP_036656.1 | SRELDTLRGIFRQL--- |
| JC4311      | SRELDTLRGIFRQL--- |
| NP_031704.1 | SRELDTLRGIFRQL--- |
| CEBA_BOVIN  | SRELDTLRGIFRQL--- |
| CEBA_HUMAN  | SRELDTLRGIFRQL--- |
| CEBA_MOUSE  | SRELDTLRGIFRQL--- |
| NP_004355.2 | SRELDTLRGIFRQL--- |
| AAD19575.1  | SRELDTLRGIFRQL--- |
| AAH63874.1  | SRELDTLRGIFRQL--- |
| 1NWQ        | SRELDTLRG-----    |
| AAR24284.1  | SRELDTLRGTFRQL--- |
| S26295      | SRELETLRGIFRQL--- |
| CAA60698.1  | SRELDTLRGIFRQL--- |
| S54834      | SRELDTLRGIFRQL--- |
| A56554      | SRELETLRGIFRQL--- |
| I51171      | SRELETLRGIFRQL--- |
| NP_571960.1 | TRELETLRGIFRQL--- |
| A37280      | TQELDTLRNLFROI--- |
| NP_058791.1 | TQELDTLRNLFROI--- |
| XP_139135.2 | TQELDTLRNLFROI--- |
| AAC50709.1  | TQELDTLRNLFROI--- |
| NP_001796.2 | TQELDTLRNLFROI--- |
| CEBE_HUMAN  | TQELDTLRNLFROI--- |
| CAA10944.1  | TQELDTLRNLFROI--- |
| AAC51130.1  | TQELDTLRNLFROI--- |
| CEBD_HUMAN  | TRDLAGLRQFFKQL--- |
| NP_005186.2 | TRDLAGLRQFFKQL--- |
| AAA59927.1  | TRDLAGLRQFFKQL--- |
| CEBD_MOUSE  | TRDLAGLRQFFKQL--- |
| NP_031705.2 | TRDLAGLRQFFKQL--- |
| NP_037286.1 | TRDLASLRQFFKEL--- |
| JC7264      | TRDLAGLRRFFKQL--- |
| NP_776692.1 | TRDLAGLRRFFKQL--- |
| AAH45282.1  | TRELSSLRNFFKQM--- |
| AAH56512.1  | TRELSSLRNFFKQM--- |
| AAH62522.1  | TRELSSLRNFFKQM--- |
| NP_571962.1 | TRELSSLRNFFKQM--- |
| BAC92757.1  | TRDLSSLRHFFKQL--- |
| BAC92758.1  | TRDLSSLRHFFKQL--- |
| I51172      | TRDLTSLRHFFKQL--- |
| BAB40972.1  | TQELGTFKHILSQR--- |
| NP_571912.1 | LHEVEALRHILSQR--- |
| A43481      | TNELQLHKQIYMQL--- |
| NP_523843.1 | TNELQLHKQIYMQL--- |
| CEB_DROME   | TNELQLHKQIYMQL--- |
| CEB_DROVI   | TNELSLHKQIYMQL--- |
| XP_309553.1 | NNEIALYKQLYMHL--- |
| S26300      | TKELSVLKDLFLEH--- |
| XP_341843.1 | TKELSVLKDLFLEH--- |
| CEBG_MOUSE  | TKELSVLKDLFLEH--- |
| CEBG_RAT    | TKELSVLKDLFLEH--- |
| NP_001797.1 | TKELSVLKDLFLEH--- |
| A36673      | TKELSVLKDLFLEH--- |
| AAC60217.1  | TKELSVLKDLFLEH--- |
| I50223      | TKELSVLKDLFLEH--- |
| NP_571961.1 | SKELSVLKDLFLEH--- |

|             |                   |
|-------------|-------------------|
| XP_315443.1 | KKELKFLKELFITQ--- |
| A53066      | SKELNVLKGLFLNV--- |
| AAG61258.1  | SKELNVLKGLFLNV--- |
| BAD16556.1  | TKELTVLKGLFLNV--- |
| NP_871835.1 | QKELSFLKEMFMAY--- |
| T15174      | QKELSFLKEMFMAY--- |
| CAE67150.1  | QKELSFLKEMFMAY--- |
| AAB06796.1  | TKEITLLKELLAK---  |
| NP_497269.1 | ETQVEDYKRLVMMF--- |
| T16528      | ETQVEDYKRLVMMF--- |
| CAE69150.1  | EAQVEDYKRLVMMF--- |
| CAE58077.1  | EAQVDDYKRMVMMF--- |
| NP_648434.1 | EKHISTLRDLI-----  |
| A41524      | RKEVGRCKNIVSKY--- |
| NP_990713.1 | RKEVGRCKNIVSKY--- |
| TEF_PHOSU   | -----             |
| CAD97856.1  | RKEVGKCKTIVSKY--- |
| NP_003207.1 | RKEVGKCKTIVSKY--- |
| NP_059072.1 | RKEVGKCKTIVSKY--- |
| NP_062067.1 | RKEVGKCKTIVSKY--- |
| CAB62497.1  | RKEVGKCKTIVSKY--- |
| AAA81373.1  | RKEVGKCKTIVSKY--- |
| AAS45600.1  | RKEVGKCKTIVSKY--- |
| NP_705617.1 | RKEVGKCKTIVSKY--- |
| TEF_HUMAN   | RKEVGKCKTIVSKY--- |
| AAH54981.1  | RKELGKCRNIISKY--- |
| AAA58445.1  | RKELGKCKNILAKY--- |
| AAH57693.1  | RKELGKCKNILAKY--- |
| BAC37522.1  | RKELGKCKNILAKY--- |
| XP_343957.1 | RKELGKCKNILAKY--- |
| HLF_RAT     | RKELGKCKNILAKY--- |
| NP_002117.1 | RKELGKCKNILAKY--- |
| NP_766151.1 | RKELGKCKNILAKY--- |
| AAC00211.1  | RKDFGRCKNTVARY--- |
| NP_571475.1 | RKDFGRCKNTVARY--- |
| NP_001343.2 | RQELSHYRAVLSRY--- |
| NP_058670.1 | RQELSHYRAVLSRY--- |
| NP_036675.1 | RQELSHYRAVLSRY--- |
| AAH18323.1  | RQELSHYRAVLSRY--- |
| A55558      | RQELSHYRAVLSRY--- |
| AAR99621.1  | RQELSHYRAVLSRY--- |
| AAR99622.1  | RQELSHYRAVLSRY--- |
| BAA05833.1  | RQELSHYRAVLSRY--- |
| AAP36478.1  | RQELSHYRAVLSRY--- |
| AAF04508.1  | KQENMDLRARLSKF--- |
| AAF04509.1  | KQENMDLRARLSKF--- |
| NP_524832.2 | KQENMDLRARLSKF--- |
| AAF15511.1  | KQENMDLRARLSKF--- |
| AAO25043.1  | KQENMDLRARLSKF--- |
| AAS93764.1  | KQENMDLRARLSKF--- |
| NP_729297.1 | KQENMDLRARLSKF--- |
| NP_729298.1 | KQENMDLRARLSKF--- |
| NP_729301.1 | KQENMDLRARLSKF--- |
| NP_729302.1 | KQENMDLRARLSKF--- |
| NP_729303.1 | KQENMDLRARLSKF--- |
| XP_316411.1 | KQENMELRARLSKY--- |
| BAC06840.1  | KLENTQLSTRLEKY--- |

|             |                    |
|-------------|--------------------|
| AAQ22473.1  | KVQLAAFTS-----     |
| NP_525049.1 | KVQLAAFTS-----     |
| S17370      | KVQLAAFTS-----     |
| NP_572367.1 | EVQLAAITS-----     |
| XP_321187.1 | RKQL-----          |
| CAE55183.1  | KKELEKLQ-----      |
| NP_504576.1 | RAETDKLRALILTT---  |
| T31706      | RAETDKLRALILTT---  |
| CAE64514.1  | RAETDKLRRTLILTT--- |
| CAE72616.1  | QQEAAKLR-----      |
| NP_493610.1 | EQEAAQLR-----      |
| NP_611101.1 | RDELQTVRQLLGAT---  |
| AAC59867.2  | R-----             |
| AAC59875.1  | R-----             |
| AAH08197.1  | K-----             |
| CAA45597.1  | K-----             |
| NP_989949.1 | K-----             |
| NP_446179.1 | K-----             |
| NP_059069.1 | K-----             |
| NP_005375.1 | K-----             |
| AAH60943.1  | K-----             |
| XP_372707.1 | K-----             |
| AAM29449.1  | RDKFN-----         |
| NP_723075.1 | RDKFN-----         |
| CAA72535.1  | RDKFN-----         |
| NP_477191.1 | RDKFN-----         |
| XP_317705.1 | KSKYN-----         |
| CAE68044.1  | YQENMMMKNQLVQH---  |
| NP_502961.1 | QLQNESMRQHL-----   |
| AAC49425.1  | NKENEFWKAKLNDI---  |
| NP_012282.1 | NKENEFWKAKLNDI---  |
| XP_386827.1 | TQQRDFYRDDRNRL---  |
| AAD38380.1  | ELENQWLKNLITEK---  |
| EAA62399.1  | EMENRWLKNLLTEK---  |
| CYS3_NEUCR  | ETENKWLKGLVTEK---  |
| XP_385347.1 | ETENKWLKNLLVVDK--- |
| NP_594523.1 | EMENNWLKGLIRPT---  |
| EAL01493.1  | ELENRCLKNIIFQQ---  |
| EAK98059.1  | EMENKLLRNLIIEK---  |
| 1DGC        | KK-----            |
| 1YSAD       | KKLVGE-----        |
| 1LD4        | KK-----            |
| 1YSAC       | KK-----            |
| 2DGC        | KK-----            |
| NP_010907.1 | KK-----            |
| CAE52206.1  | KK-----            |
| CAE52208.1  | KK-----            |
| CAE52210.1  | KK-----            |
| CAE52217.1  | KK-----            |
| CAE52220.1  | KK-----            |
| NP_984085.1 | R-----             |
| AAF18140.1  | QE-----            |
| EAK95477.1  | QE-----            |
| BAC55240.1  | K-----             |
| A30208      | -----              |
| XP_323369.1 | -----              |
| EAA48944.1  | -----              |

|             |                   |
|-------------|-------------------|
| XP_389462.1 | -----             |
| EAK83968.1  | EKERNDALALLS----- |
| AAL09315.1  | -----             |
| EAA59883.1  | -----             |
| CPC1_CRYPA  | -----             |
| NP_498426.1 | KCELAQMQITIRDM--- |
| XP_310558.1 | QQDCQRWRKAVMKL--- |
