# Supplementary material
Source: PubMed Central journal article supplement (PMC1183107)
Supplement: nar_33_14_4455__3.pdf [file nar_33_14_4455__3.pdf]

CLUSTAL W (1.83) multiple sequence alignment

```
AP1_CHICK      RIKAERKRMNRNIAASKCRKRKLERIARLEEKVKTLKAQNSELASTANMLREQVAQLKQK
NP_068607.1   RIKAERKRMNRNIAASKCRKRKLERIARLEEKVKTLKAQNSELASTANMLREQVAQLKQK
AP1_PIG       RIKAERKRMNRNIAASKCRKRKLERIARLEEKVKTLKAQNSELASTANMLREQVAQLKQK
AP1_SERCA     RIKAERKRMNRNIAASKCRKRKLERIARLEEKVKTLKAQNSELASTANMLREQVAQLKQK
1404381A     RIKAERKRMNRNIAASKCRKRKLERIARLEEKVKTLKAQNSELASTANMLREQVAQLKQK
AP1_COTJA     RIKAERKRMNRNIAASKCRKRKLERIARLEEKVKTLKAQNSELASTANMLREQVAQLKQK
CAA31252.1   RIKAERKRMNRNIAASKCRKRKLERIARLEEKVKTLKAQNSELASTANMLREQVAQLKQK
TJUN_AVIS1    RIKAERKRMNRNIAASKSRKRKLERIARLEEKVKTLKAQNSELASTANMLREQVAQLKQK
NP_034722.1  RIKAERKRLNRNIAASKCRKRKLERIARLEEKVKTLKSQNTTELASTASLLREQVAQLKQK
NP_620230.1  RIKAERKRLNRNIAASKCRKRKLERIARLEEKVKTLKSQNTTELASTASLLREQVAQLKQK
NP_005345.2  RIKAERKRLNRNIAASKCRKRKLERIARLEEKVKTLKSQNTTELASTASLLREQVAQLKQK
JUND_CHICK    RIKAERKRLNRNIAASKCRKRKLERIARLEEKVKSLKSQNTTELASTASLLREQVAQLKQK
AAH09465.1   RIKVERKRLNRNLAATKCRKRKLERIARLEEDKVKTLKAENAGLSSTAGLLREQVAQLKQK
NP_068608.2  RIKVERKRLNRNLAATKCRKRKLERIARLEEDKVKTLKAENAGLSSTAGLLREQVAQLKQK
AAA74916.1   RIKVERKRLNRNLAATKCRKRKLERIARLEEDKVKTLKAENAGLSAAGLLREQVAQLKQK
JUNB_CYPCA    RIKAERKRLNRNLAATKCRKRKLERIARLEEKVKVLKNDNAGLSNTASVLRDQVAQLKQK
NP_476586.1  KIKLERKRQNRVAASKCRKRKLERISKLEDRVKVLKGENVDLASIVKLNLDHVAQLKQK
CAE52206.1   -----KRARNTEAARRSRARKLQRMKQLEDKVEELLSKNYHLEN-----EVARLKK-
AAH05174.1   GDRKQKKRDQNKSAALRYRQKRAEGEALEGECQGLEARNRELKERAESVEREIQYVKDL
NP_109618.1  GDRKQKKRDQNKSAALRYRQKRAEGEALEGECQGLEARNRELRERAESVEREIQYVKDL
ATF4_HUMAN    LDKKLLKMEQNKTAATRYRQKKRAEQEALTGECKELEKKNEALKERADSLAKEIQYLKDL
ATF4_MOUSE    LDKKLLKMEQNKTAATRYRQKKRAEQEALTGECKELEKKNEALKEKADSLAKEIQYLKDL
CYS3_NEUCR    ----EDKRRKRNNTAASARFRIKKKQREQALESKAKEMSEKVTQLEGRIQALETENKWLKGL
NP_037044.1   DERKRRRRERENKIAAAKCRNKKKKEKTECLOKESEKLESVNAELKAQIEELKNEKQHLYM
NP_031524.2   DERKRRRRERENKIAAAKCRNKKKKEKTECLOKESEKLESVNAELKAQIEELKNEKQHLYM
NP_001665.1   DERKRRRRERENKIAAAKCRNKKKKEKTECLOKESEKLESVNAELKAQIEELKNEKQHLYM
NP_034365.1   EERRRVRREERNKLAATAKCRNRRKELTDFLQAETDKLEDEKSGLQREIEELQKQKERLELV
NP_005429.1   EERRRVRREERNKLAATAKCRNRRKELTDFLQAETDKLEDEKSGLQREIEELQKQKERLELV
NP_037085.1   EERRRVRREERNKLAATAKCRNRRKELTDFLQAETDKLEDEKSGLQREIEELQKQKERLELV
FOS_MESAU     EEKRRIRREERNKMAAAKCRNRRRELTDTLQAETDQLEDEKSALQTEIANLLKEKEKLEFI
FOS_CRIGR     EEKRRIRREERNKMAAAKCRNRRRELTDTLQAETDQLEDEKSALQTEIANLLKEKEKLEFI
NP_005243.1   EEKRRIRREERNKMAAAKCRNRRRELTDTLQAETDQLEDEKSALQTEIANLLKEKEKLEFI
NP_034364.1   EEKRRIRREERNKMAAAKCRNRRRELTDTLQAETDQLEDEKSALQTEIANLLKEKEKLEFI
AAG47951.1   EEKRRIRREERNKMAAAKCRNRRRELTDTLQAETDQLEDEKSALQTEIANLLKEKEKLEFI
FOS_MSVFB     EEKRRIRREERNKMAAAKCRNRRRELTDTLQAETDQLEDEKKSALQTEIANLLKEKEKLEFI
FOS_AVINK     EEKRRIRREERNKMAAAKCRNRRRELTDTLQAETDQLEEEKSALQAEIANLLKEKEKLEFI
NP_990839.1   EEKRRIRREERNKMAAAKCRNRRRELTDTLQAETDQLEEEKSALQAEIANLLKEKEKLEFI
FOS_FUGRU     EEKRRIRREERNKQAAAKCRNRRRELTDTLQAETDQLEDEKSSLQNDIANLLKEKERLEFI
FOS_TETFL     EEKRRIRREERNKQAAAKCRNRRRELTDSLQAETDQLEAEKSSLQNDIANLLKEKERLEFI
FOS_CYPCA     EEKRRVRREERNKMAAAKCRNRRRELTDTLQAETDELEDEKSALQNDIANLLKEKERLEFI
NP_032062.1   EEKRRVRREERNKLAATAKCRNRRRELTDRLQAETDQLEEEKAELESEIAELQKEKERLEFV
NP_006723.1   EEKRRVRREERNKLAATAKCRNRRRELTDRLQAETDQLEEEKAELESEIAELQKEKERLEFV
NP_037086.1   EEKRRIRREERNKLAATAKCRNRRRELTEKLQTEETELEEKSGLQKEIAELQKEKEKLEFM
NP_005244.1   EEKRRIRREERNKLAATAKCRNRRRELTEKLQAEETELEEKSGLQKEIAELQKEKEKLEFM
FRA2_MOUSE    EEKRRIRREERNKLAATAKCRNRRRELTEKLQAEETELEEKSGLQKEIAELQKEKEKLE--
FRA2_CHICK    EEKRRIRREERNKLAATAKCRNRRRELTEKLQAEETELEEKSVLQKEIAELQKEKEKLEFM
A35847        EQKRAVRRERENKQAAARCRKRRVDQTNELTEEVEQLEKRGESMRKEIEVLTNSKNQLEYL
XP_133376.1   SNEYRVRREERNNIAVRKSRDKAKQRNVETQQKVLELTSNDNRLRKRVEQLSRELDTLRGI
CEBA_BOVIN    SNEYRVRREERNNIAVRKSRDKAKQRNVETQQKVLELTSNDNRLRKRVEQLSRELDTLRGI
CEBA_HUMAN    SNEYRVRREERNNIAVRKSRDKAKQRNVETQQKVLELTSNDNRLRKRVEQLSRELDTLRGI
NP_036656.1   SNEYRVRREERNNIAVRKSRDKAKQRNVETQQKVLELTSNDNRLRKRVEQLSRELDTLRGI
NP_034013.1   SDEYKMRREERNNIAVRKSRDKAKMRNLETQHKVLELTAENERLQKKVEQLSRELSTLRNL
CAA43179.1   SDEYKMRREERNNIAVRKSRDKAKMRNLETQHKVLELTAENERLQKKVEQLSRELSTLRNL
NP_990584.1   SDEYKLRREERNNIAVRKSRDKAKMRNLETQHKVLELTAENERLQKKVEQLSRELSTLRNL
```

NP\_005185.2 SDEYKIRRRERNNI AVRKSRDKAKMRNLETQHKVLELTAENERLQKKVEQLSRELSTLRNL  
NP\_789745.1 SDEYKIRRRERNNI AVRKSRDKAKMRNLETQHKVLELTDGENERLQKKVEQLSREVSTLRNL  
CEBE\_HUMAN SLEYRLRRERNNI AVRKSRDKAKRRI LETQQKVLEYMAENERLRSRVEQLTQELDTLRNL  
NP\_058791.1 SLEYRLRRERNNI AVRKSRDKAKRRI METQQKVLEYMAENERLRSRVDQLTQELDTLRNL  
NP\_031705.2 SPEYRQRRERNNI AVRKSRDKAKRRNQEMQQKLVELSAENEKHLHQRVEQLTRDLAQLRQF  
CEBD\_HUMAN SPEYRQRRERNNI AVRKSRDKAKRRNQEMQQKLVELSAENEKHLHQRVEQLTRDLAQLRQF  
NP\_037286.1 SPEYRQRRERNNI AVRKSRDKAKRRNQEMQQKLVELSAENEKHLHQRVEQLTRDLASLRQF  
A43481 TDEYRRRRERNNI AVRKSREKAKVRSREVEERVKSLLKEKDALIRQLGEMTNELQLHKQI  
CEB\_DROVI TEEYRRRRERNNI AVRKSREKAKVRSKEVEERVKSLLKEKDALLRQLSEMTNELSLHKQI  
CEBG\_MOUSE SDEYRQRRERNNMAVKKSRKSKQKAQDTLQRVNQLKEENERLEAIKLLTKELSVLKDL  
CEBG\_RAT SDEYRQRRERNNMAVKKSRKSKQKAQDTLQRVNQLKEENERLEAIKLLTKELSVLKDL  
NP\_001797.1 SDEYRQRRERNNMAVKKSRKSKQKAQDTLQRVNQLKEENERLEAIKLLTKELSVLKDL  
AAH18323.1 DEKYWSRRYKNNEAAKRSRDARLKENQI SVRAAFLEKENALLRQEVVAVRQELSHYRAV  
AAR99622.1 DEKYWSRRYKNNEAAKRSRDARLKENQI SVRAAFLEKENALLRQEVVAVRQELSHYRAV  
BAA05833.1 DEKYWSRRYKNNEAAKRSRDARLKENQI SVRAAFLEKENALLRQEVVAVRQELSHYRAV  
NP\_062067.1 DEKYWTRRKKNNVAAKRSRDARLKENQI TIRAAFLEKENTALRTEVAELRKEVKGCKTI  
NP\_003207.1 DEKYWTRRKKNNVAAKRSRDARLKENQI TIRAAFLEKENTALRTEVAELRKEVKGCKTI  
NP\_002117.1 DDKYWARRRKNMMAAKRSRDARLKENQI AIRASFLEKENSALRQEVADLRKELGKCKNI  
HLF\_RAT DDKYWARRRKNMMAAKRSRDARLKENQI AIRASFLEKENSALRQEVADLRKELGKCKNI  
NP\_493610.1 DSAYFERRRKNNDAAKRSRDARRQKEEQI ASKAHALERENMQLRGKVS SLEQEAQLR--  
NP\_525049.1 DAAYYERRRKNNAAKKSRDRRI KEDEIAIRAAYLERQNI ELLCQIDALKVQLAFTS-  
NP\_006390.1 DVRRVQRREKNRI AAQKSRQRTQKADTLHLESEDLKQNAALRKEIKQLTEELKYFTSV  
NP\_058047.1 DVRKVQRREKNRI AAQKSRQRTQKADTLHLESEDLKQNAALRKEIKQLTEELKYFTSV  
NP\_594500.1 DEKRRRILERNRI AASKFRQKKKEWIKLEQTANAAFEQSKRLQLLLS QLQQAFLRKSQ  
NP\_014232.1 ERKRKEFLERNRVAASKFRKRKKEYIKKIEN--DLQFYESE-----YDDLTVIGKL---  
NP\_112280.1 DEKRRKFLERNRAAASRCRQKRKVVVQSLEKKAEDLSSLNGQLQSEVTLRNEVAQLKQL  
AAH42210.1 DEKRRKFLERNRAAASRCRQKRKVVVQSLEKKAEDLSSLNGQLQSEVTLRNEVAQLKQL  
ATF2\_HUMAN DEKRRKFLERNRAAASRCRQKRKVVVQSLEKKAEDLSSLNGQLQSEVTLRNEVAQLKQL  
NP\_990235.1 DEKRRKFLERNRAAASRCRQKRKVVVQSLEKKAEDLSSLNGQLQSEVTLRNEVAQLKQL  
ATF7\_HUMAN DERRRQFLERNRAAASRCRQKRKVVVSSLEKKAEEELTSQNI QLSNEVTLRNEVAQLKQL  
BAA12194.1 EEKRKSFLEERNRQAALKCRQKRKQWLSNLQAKVEFYGNENEILSAQVSAALREEIVSLKTL  
NP\_012228.1 --KRARLLERNRIAASKCRQKRKVAQLQLQKEFNEIKDENRILLKKNLYYEKLI SKFK--  
NP\_034082.1 ARKREVRLMKNREAARECRKKE YVKCLENRVAVLENQNKTLIEELKALKD-----  
NP\_112279.1 ARKREVRLMKNREAARECRKKE YVKCLENRVAVLENQNKTLIEELKALKD-----  
CREB\_BOVIN ARKREVRLMKNREAARECRKKE YVKCLENRVAVLENQNKTLIEELKALKD-----  
AAQ24858.1 ARKREVRLMENREAARECRKKE YVKCLENRVAVLENQNKTLIEELKALKD-----  
BAA83552.1 TRKRELRLMKNREAARECRKKE YVKCLENRVAVLESQNKTLIEELKALKD-----  
CREM\_CANFA TRKRELRLMKNREAARECRKKE YVKCLENRVAVLENQNKTLIEELKALKD-----  
CREB\_CHLVR TRKRELRLYKNREAARECRKKE YVKCLENRVAVLENQNKALIEELKSLKD-----  
NP\_005162.1 QLKREIRLMKNREAARECRKKE YVKCLENRVAVLENQNKTLIEELKTLKD-----  
BAB26930.1 QLRREIRLMKNRGAARECRKKE YVKCLENRVAVLENQNKTLIEELKTLKD-----  
CREM\_MOUSE TRKRELRLMKNREAARECRKKE YVKCLESRVAVLEVQNKKLEEELETLKD-----  
CREM\_HUMAN TRKRELRLMKNREAARECRKKE YVKCLESRVAVLEVQNKKLEEELETLKD-----  
NP\_568246.1 ENKRLKRLLRNRVSAQQARERKKAYLSELENRVKDLENKNSLEERLSTLQENQMLRHI  
BAA06486.1 DQKTMRRLAQNREAARKSRLRKKAYVQOLENSRLKLT----QLEQELQR-----  
TG21\_TOBAC DQKTLRRLAQNREAARKSRLRKKAYVQOLENSRLKLS----QLEQDLQR-----  
AAF06696.1 DQKTLRRLAQNREAARKSRLRKKAYVQOLENSRMKLT----QLEQELQR-----  
CPR1\_PETCR DLKRERRKQSNRESARRSRLRQAEAEELAIKVDSLTAENMALKAEINRLTLTAEKLTND  
TAF1\_TOBAC ELKREKRKQSNRESARRSRLRQAEAEELAIRVQSLTAENMTLKSEINKLMENSEKLLKLE  
NP\_850449.1 ELKREKRKQSNRESARRSRLRQAEETEELARKVEALTAENMALRSELNQLNEKSDKLRGA  
AAM62869.1 EVKREKRKQSNRESARRSRLRQAEETEQLSVKVDALVAENMSLRSLGQLNNESEKLRLE  
EMP1\_WHEAT ELKREKRKQSNRESARRSRLRQAECEELAQKVSELTAANGTLRSELDQLKKDKCTMETE  
NP\_849510.1 ELKRQKRKQSNRESARRSRLRQAECEQLQORVESLSNENQSLRDELQRLSSECDKLSKSE  
AAB29937.1 SEAKSRRTAQNRAAQRAFDRKEAKMKSQERVELLEQKDAQNKTTTDFLLCSLKSLLSE  
AP1\_KLULA TEAKDKRTAQNRAAQRAFRRERERKMKLEEDKVSQLES LNKQSELETKFLRNQVTNLLSE  
NP\_593662.1 QEPSKRKAQNRAAQRAFRRERERKMKLEEDKVSQLES LNKQSELETKFLRNQVTNLLSE  
MAF\_MOUSE RLKQKRRTLKNRGAQSCRFRVQQRHVLESEKNQLLQQVDHLKQEI SRLVRRERDAYKEK

|             |                                                                |
|-------------|----------------------------------------------------------------|
| NP_062191.1 | RLKQKRRTLKNRGYAQSCRFKRVQQRHVLESEKNQLLQOVDHLKQEISRLVRRERDAYKEK  |
| NP_005351.2 | RLKQKRRTLKNRGYAQSCRFKRVQQRHVLESEKNQLLQOVDHLKQEISRLVRRERDAYKEK  |
| TMAF_AVIS4  | RLKQKRRTLKNRGYAQSCRFKRVQQRHVLESEKNQLLQOQVEHLKQEISRLVRRERDAYKEK |
| NP_034788.1 | RLKQKRRTLKNRGYAQSCRYKRVQKHHLENEKTQLIQQVEQLKQEVSRLARERDAYKVK    |
| NP_062189.1 | RLKQKRRTLKNRGYAQSCRYKRVQKHHLENEKTQLIQQVEQLKQEVSRLARERDAYKVK    |
| NP_005452.2 | RLKQKRRTLKNRGYAQSCRYKRVQKHHLENEKTQLIQQVEQLKQEVSRLARERDAYKVK    |
| NP_032762.1 | RLKQRRRTLKNRGYAQACRSKRLQORRGLEAERARLAAQLDALRAEVARLARERDLYKAR   |
| NP_006168.1 | RLKQRRRTLKNRGYAQACRSKRLQORRGLEAERARLAAQLDALRAEVARLARERDLYKAR   |
| NP_034885.1 | RLKQRRRTLKNRGYAASCRVKRVCQKEELQKQKSELEREVDKLARENAAMRLELDALRGK   |
| NP_036455.1 | RLKQRRRTLKNRGYAASCRVKRVCQKEELQKQKSELEREVDKLARENAAMRLELDALRGK   |
| NP_990088.1 | RLKQRRRTLKNRGYAASCRVKRVCQKEELQKQKMELEWEVDKLARENAAMRLELDTLRGK   |
| NP_034886.1 | QLKQRRRTLKNRGYAASCRVKRVTQKEELEKQKAELQQEVEKLAENASMKLELDALRSK    |
| NP_002350.1 | QLKQRRRTLKNRGYAASCRVKRVTQKEELEKQKAELQQEVEKLAENASMKMELDALRSK    |
| MAFG_CHICK  | QLKQRRRTLKNRGYAASCRVKRVTQKEELEKQKAELQQEVEKLAENASMKMELDALRSK    |
| NP_002351.1 | RLKQRRRTLKNRGYAASCRIKRVTQKEELERQRVELQQEVEKLARENSMRLELDALRSK    |
| NP_034887.1 | RLKQRRRTLKNRGYAASCRIKRVTQKEELERQRVELQQEVEKLARENSMRLELDALRSK    |
| NP_990087.1 | RLKQRRRTLKNRGYAASCRIKRVTQKEELERQRVELQQEVEKLARENSMKLELDALRSK    |
| NP_035032.1 | LIRDIRRRGKNKVAQAQNCRKRKLENIVELEQDLGHLKDEREKLLREKGENDRNLHLLKRR  |
| NP_113977.1 | LIRDIRRRGKNKVAQAQNCRKRKLENIVELEQDLGHLKDEREKLLREKGENDRNLHLLKRR  |
| NP_006155.2 | LIRDIRRRGKNKVAQAQNCRKRKLENIVELEQDLHLKDEKEKLLKEKGENDKSLHLLKKQ   |
| AAA35612.1  | LVRDIRRRGKNKVAQAQNCRKRKLETIVQLERELERLTNERERLLRARGEADRTLEVMRQQ  |
| NP_003195.1 | LIRDIRRRGKNKMAQAQNCRKRKLDITLNLERDVEDLQRDKARLLREKVEFLRSRQMKQK   |
| NP_032712.2 | LIRDIRRRGKNKMAQAQNCRKRKLDITLNLERDVEDLQRDKARLLREKVEFLRSRQMKQK   |
| NP_732833.1 | LIRDIRRRGKNKVAQAQNCRKRKLDQILTLEDEVNAVVKRKTQLNQDRDHLESERKRISNK  |
| BAA95505.1  | -----RRRSKNRIAAQRCRKRKLDICIQNLESEIEKLQSEKESLLKERDHILSTLGETKQN  |
| NP_031546.1 | -----RRRSKNRIAAQRCRKRKLDICIQNLESEIEKLQSEKESLLKERDHILSTLGETKQN  |
| NP_031547.1 | -----RRRSKNRIAAQRCRKRKLDICIQNLECEIRKLVCEKEKLLSERNHK-----       |
| AAK48898.1  | -----RRRSKNRIAAQRCRKRKLDICIQNLECEIRKLVCEKEKLLSERNQLK-----      |

\*

|             |      |
|-------------|------|
| AP1_CHICK   | VMNH |
| NP_068607.1 | VMNH |
| AP1_PIG     | VMNH |
| AP1_SERCA   | VMNH |
| 1404381A    | VMNH |
| AP1_COTJA   | VMNH |
| CAA31252.1  | VMNH |
| TJUN_AVIS1  | VMNH |
| NP_034722.1 | VLSH |
| NP_620230.1 | VLSH |
| NP_005345.2 | VLSH |
| JUND_CHICK  | VLSH |
| AAH09465.1  | VMTH |
| NP_068608.2 | VMTH |
| AAA74916.1  | VMTH |
| JUNB_CYPCA  | VLRH |
| NP_476586.1 | VMEH |
| CAE52206.1  | ---- |
| AAH05174.1  | LIEV |
| NP_109618.1 | LIEV |
| ATF4_HUMAN  | IEEV |
| ATF4_MOUSE  | IEEV |
| CYS3_NEUCR  | VTEK |
| NP_037044.1 | LNLH |
| NP_031524.2 | LNLH |
| NP_001665.1 | LNLH |
| NP_034365.1 | LEAH |

|             |       |
|-------------|-------|
| NP_005429.1 | LEAH  |
| NP_037085.1 | LEAH  |
| FOS_MESAU   | LAAH  |
| FOS_CRIGR   | LAAH  |
| NP_005243.1 | LAAH  |
| NP_034364.1 | LAAH  |
| AAG47951.1  | LAAH  |
| FOS_MSVFB   | LAAH  |
| FOS_AVINK   | LAAH  |
| NP_990839.1 | LAAH  |
| FOS_FUGRU   | LAAH  |
| FOS_TETFL   | LAAH  |
| FOS_CYPCA   | LAAH  |
| NP_032062.1 | LVAH  |
| NP_006723.1 | LVAH  |
| NP_037086.1 | LVAH  |
| NP_005244.1 | LVAH  |
| FRA2_MOUSE  | ----  |
| FRA2_CHICK  | LVAH  |
| A35847      | LATH  |
| XP_133376.1 | FRQL  |
| CEBA_BOVIN  | FRQL  |
| CEBA_HUMAN  | FRQL  |
| NP_036656.1 | FRQL  |
| NP_034013.1 | FKQL  |
| CAA43179.1  | FKQL  |
| NP_990584.1 | FKQL  |
| NP_005185.2 | FKQL  |
| NP_789745.1 | FKTL  |
| CEBE_HUMAN  | FRQI  |
| NP_058791.1 | FRQI  |
| NP_031705.2 | FKKL  |
| CEBD_HUMAN  | FKQL  |
| NP_037286.1 | FKEL  |
| A43481      | YMQQL |
| CEB_DROVI   | YMQQL |
| CEBG_MOUSE  | FLEH  |
| CEBG_RAT    | FLEH  |
| NP_001797.1 | FLEH  |
| AAH18323.1  | LSRY  |
| AAR99622.1  | LSRY  |
| BAA05833.1  | LSRY  |
| NP_062067.1 | VSKY  |
| NP_003207.1 | VSKY  |
| NP_002117.1 | LAKY  |
| HLF_RAT     | LAKY  |
| NP_493610.1 | ----  |
| NP_525049.1 | ----  |
| NP_006390.1 | LNSH  |
| NP_058047.1 | LSSH  |
| NP_594500.1 | LLAH  |
| NP_014232.1 | ----  |
| NP_112280.1 | LLAH  |
| AAH42210.1  | LLAH  |
| ATF2_HUMAN  | LLAH  |
| NP_990235.1 | LLAH  |
| ATF7_HUMAN  | LLAH  |

|             |      |
|-------------|------|
| BAA12194.1  | LIAH |
| NP_012228.1 | ---- |
| NP_034082.1 | ---- |
| NP_112279.1 | ---- |
| CREB_BOVIN  | ---- |
| AAQ24858.1  | ---- |
| BAA83552.1  | ---- |
| CREM_CANFA  | ---- |
| CREB_CHLVR  | ---- |
| NP_005162.1 | ---- |
| BAB26930.1  | ---- |
| CREM_MOUSE  | ---- |
| CREM_HUMAN  | ---- |
| NP_568246.1 | LKNT |
| BAA06486.1  | ---- |
| TG21_TOBAC  | ---- |
| AAF06696.1  | ---- |
| CPR1_PETCR  | NSRL |
| TAF1_TOBAC  | NAAL |
| NP_850449.1 | NATL |
| AAM62869.1  | NEAI |
| EMP1_WHEAT  | NKKL |
| NP_849510.1 | NNSI |
| AAB29937.1  | ITKY |
| AP1_KLULA   | LKRY |
| NP_593662.1 | LRIL |
| MAF_MOUSE   | YEKL |
| NP_062191.1 | YEKL |
| NP_005351.2 | YEKL |
| TMAF_AVIS4  | YEKL |
| NP_034788.1 | CEKL |
| NP_062189.1 | CEKL |
| NP_005452.2 | CEKL |
| NP_032762.1 | CDRL |
| NP_006168.1 | CDRL |
| NP_034885.1 | CEAL |
| NP_036455.1 | CEAL |
| NP_990088.1 | YEAL |
| NP_034886.1 | YEAL |
| NP_002350.1 | YEAL |
| MAFG_CHICK  | YEAL |
| NP_002351.1 | YEAL |
| NP_034887.1 | YEAL |
| NP_990087.1 | YEAL |
| NP_035032.1 | LSTL |
| NP_113977.1 | LSTL |
| NP_006155.2 | LSTL |
| AAA35612.1  | LTEL |
| NP_003195.1 | VQSL |
| NP_032712.2 | VQSL |
| NP_732833.1 | FAML |
| BAA95505.1  | LTGL |
| NP_031546.1 | LTGL |
| NP_031547.1 | ---- |
| AAK48898.1  | ---- |
