# Supplementary material
Source: PubMed Central journal article supplement (PMC1183107)
Supplement: nar_33_14_4455__4.pdf [file nar_33_14_4455__4.pdf]

CLUSTAL W (1.83) multiple sequence alignment

```
At3g17610_1      EYRSLKRLLRNRVSAQQ - ARERKKVYVS - DLESRANELQNNNDQLEEKI STLTNENTMLR
At5g11260       ENKRLKRLLRNRVSAQQ - ARERKKAYLS - ELENRVKDLENKNSLEERLSTLQENQMLR
Hs19745184      ARKREVRLMKNREAARE - CRRKKKEYVK - CLENRVAVLENQNKTLEELKALKD - - - - -
Hs4758054      ARKREVRLMKNREAARE - CRRKKKEYVK - CLENRVAVLENQNKTLEELKALKD - - - - -
Hs8393194      TRKRELRLMKNREAARE - CRRKKKEYVK - CLENRVAVLENQNKTLEELKALKD - - - - -
Hs4885073      QLKREIRLMKNREAARE - CRRKKKEYVK - CLENRVAVLENQNKTLEELKTKLD - - - - -
7293451        TRKREIRLQKNREAARE - CRRKKKEYIK - CLENRVAVLENQNKALIEELKSLKELYCQTK
CE24265        NRKRQVRLKKNREAAKE - CRRKKKEYVK - CLENRVSVLENQNKALIEELKTKLKE - - - - -
CE24266        NRKRQVRLKKNREAAKE - CRRKKKEYVK - CLENRVSVLENQNKALIEELKTKLKE - - - - -
Hs15298466     VLRRQQRMIKNRESACQ - SRKKKKEYML - GLEARLKAALSENEQLKKENGT LKRQLDEVV
Hs6671585     VLRRQQRMIKNRESACQ - SRKKKKEYML - GLEARLKAALSENEQLKKENGT LKRQLDEVV
Hs20631977     LLKRQQRMIKNRESACQ - SRRKKKEYLQ - GLEARLQAVLADNQQLRRENAALRRRLEALL
7302252       - - KKYQRMIKNRESASL - SRKKRKEYV - SLETRINKLEKECDLSLKAENITLRDQI - - - -
7294270       SLKKIRRKIKNKISAE - SRRKKKEYMD - QLERRVEILVTENHDYKKRLEGLEETNANLL
Hs16418355     ALKRVRRKIKNKISAE - SRRKKKEYVE - CLEKKVETFTSENNE LWKKVETLENANRTLL
CE01814       SLKIVRRKIKNKLSAE - SRRKRKEYID - ALEGR LHCFSEENKSLKKQVHQLEASNRDLQ
Hs14211949     VLKKIRRKIRNKQSAE - SRKKKKEYID - GLETRMSACTAQNQELQRKVLHLEKQNL SLL
Hs18702325     VLKVRRKIRNKQSAQD - SRRRKKKEYID - GLESRVAACSAQNQELQKKVQELERHNI SLV
Hs20127492     ILKRVRKIRNKRSAE - SRRKKKVVYV - GLESRVLKYTAQNME LQNKVQLLEEQNLSLL
CE11300       DLKRIRRKIRNKRSAT - SRKRQDYIE - QLEDRVSESTKENQALQQIERLSS ENQSVI
CE01056       EEKMDRRKLNKRVAAQ - ARDKKERSA - KIEDVMRDLVEENRRLRAENERLRRQNKNL -
Hs14110395     EEKALRRKLNKRVAAQ - ARDRKKARMS - ELEQQVVDLEEENQKLLLENQLLREKTHGLV
7291250       EEKVQRKLNKRVAAQ - SRDRKKARME - EMDYEIKELTDRTEILQNKCD SLQAINESLL
CE17828       - - - - QNRKIRNRMYAQ - SRMRKKEADE - HMKMNLOELLQENEILRTENAALKQR - - - - L-
Hs14775169     QLKQRRRTLKNRGYAA - CRVKRVQKE - ELEKQKAELOQVEVEKLASENASMKLELDALR
Hs4505073     QLKQRRRTLKNRGYAA - CRVKRVQKE - ELEKQKAELOQVEVEKLASENASMKLELDALR
Hs4505075     QLKQRRRTLKNRGYAA - CRVKRVQKE - ELEKQKAELOQVEVEKLASENASMKLELDALR
Hs6912490     RLKQRRRTLKNRGYAA - CRVKRVQKE - ELQKQSELEREVDKLARENAAMRLELDALR
7302350       RMKQRRRTLKNRGYAA - CRKRIEQKD - ELETKKS YEWTELEQM HEDNEQVRREVSNWK
Hs14770839     RLKQKRRTLKNRGYAS - CRYKRVQKH - HLENEKTQLIQQVEQLKQEV SRLARERDAYK
Hs4885447     RLKHKRRTLKNRGYAS - CRYKRVQKH - HLENEKTQLIQQVEQLKQEV SRLARERDAYK
Hs5453736     RLKQKRRTLKNRGYAS - CRFKRVQQRH - VLESEKNQLLQQVDHLKQEI SRLVRERDAYK
Hs5453802     RLKQRRRTLKNRGYAA - CRSKRLQQR - GLEAERARLAAQLDALRAEVARLARERDLYK
Hs21361118     - - QGRTRKRKQSGHSPARAGKQRMKEKEQENERKVAQLAEENERLQKQEI ERLTREVEATR
HsM4758132     - - QGRTRKRKQSGHSPARAGKQRMKEKEQENERKVAQLAEENERLQKQEI ERLTREVEATR
Hs20149576     LIRDIRRRGKNKVAAQ - CRKRKLENIV - ELEQDLHLKDEKEKLLKEKGENDKSLHLLK
Hs5453774     LVRDIRRRGKNKVAAQ - CRKRKLETIV - QLERELERLTNERERLLRARGEADRTLEV MR
Hs21918831     LIRDIRRRGKNKVAAQ - CRKRKLDIIL - NLEDDVCNLQAKKETL KREQAQCNKAINIMK
HsM5731347     LIRDIRRRGKNKVAAQ - CRKRKLDIIL - NLEDDVCNLQAKKETL KREQAQCNKAINIMK
Hs4505379     LIRDIRRRGKNKMAAQ - CRKRKLDIIL - NLERDVEDLQRDKARLLREKVEFLRSLRQMK
7300970       LIRDIRRRGKNKVAAQ - CRKRKLDQIL - TLEDEVNAVVKRKTQLNQDRDHLESERKRIS
Hs13540490     - - - - RRRSKNRIAAQR - CRKRKLDICIQ - NLECEIRKLVCEKEKLLSERNQLK - - - - -
Hs4502353     - - - - RRRSKNRIAAQR - CRKRKLDICIQ - NLESEIEKLQSEKESLLKERDHILSTLGETK
Hs10938014     RIKAERKRLRNRIASK - CRKRKLERIA - RLEEKVKTLKSONTELASTANMLREQVAQLK
Hs4758616     RIKAERKRLRNRIASK - CRKRKLERIA - RLEEKVKTLKSONTELASTANMLREQVAQLK
Hs4504809     RIKVERKRLRNLAATK - CRKRKLERIA - RLEDKVKTLKAENAGLSSTAGLLREQVAQLK
7303798       KIKLERKQRNRVAASK - CRKRKLERIS - KLEDRVKVLKGENVDL ASIVKLNKDHVAQLK
CE16461       KKKLERKRARNRQAATK - CRQKKMDRIK - ELEEQVLHEKHRGQR LDAELLELNRALEHFR
YEL009c       - - - - - KRARNT EAARR - SRARKLQRMK - QLEDKVEELLSKN - - - - - YHLENEVARLK
Hs4502263     DERKKRRRERNKIAAAK - CRNKKKEKTE - CLQKESEKLESVNAELKAQIEELKNEKQH LI
Hs4755128     DERKKRRRERNKIAAAK - CRNKKKEKTE - CLQ - - - - - LQ
Hs18497306     EERRKRRREKNKVAAAR - CRNKKKERTE - FLORESERLELMNAELKTQIEELKQERQQLI
7290135       ED RRRRRRERNKIAATK - CRMKKRERTQ - NLIKESEVLDTQNV ELKNQVRQLETERQKLV
Hs5453563     DVRRVQRREKNRIAAQK - SRQRQTQKAD - TLHLESEDL EKQNAALRKEIKQLTEELKYFT
```

Hs8924246 DDRKVRREKRNVAQR - SRKKQTQKAD - KLHEEYESLEQENTMLRREIGKLTEELKHLT  
Hs4885245 EEKRRIRREERNKLAASK - CRNRRRELTE - KLQAETEELEEEKSGLQKEIAELQKEKEKLE  
Hs5803017 EEKRRVRRERNKLAASK - CRNRRRELTD - RLQAETDQLEEEKAELESEIAELQKEKERLE  
Hs4885241 EEKRRIRREERNKMAASK - CRNRRRELTD - TLQAETDQLEDEKSALQTEIANLLKEKEKLE  
Hs4885243 EERRRVRRERNKLAASK - CRNRRKELTD - FLQAETDKLEDEKSGLQREIEELQKQKERLE  
7301826 EQKRAVRRERNKQAAAR - CRKRRVDQTN - ELTEEVEQLEKRGESMRKEIEVLTNSKNQLE  
CE27375 DDKRLKRRQRNKEAAAR - CRQRRIDLK - ELQDQVNDFKNSNDKMAECNNIRNKLNSLK  
Hs4503033 DEKRRKFLERNRAAASR - CRQKRKVWVQ - SLEKKAEDLSSLNGQLQSEVTLRNEVAQLK  
Hs5802980 DERRQRFLERNRAAASR - CRQKRKLWVS - SLEKKAEEELTSQNIQLSNEVTLRNEVAQLK  
Hs4758500 DERRRKFLERNRAAATR - CRQKRKVWVM - SLEKKAEEELTQTNMQLQNEVSMLKNEVAQLK  
SPAC21E11.03c DEKRRRILERNRIAASK - FRQKKKEWIK - ELEQTANAAFEQSKRLQLLLSLOLQEEAFRLK  
SPBC2F12.09c DMKRRRFLERNRIAASK - CRQKKKLWVQ - NLEKTAHIAACEQSKALRILVSLQREEVICLK  
SPAC22F3.02 GTKQSMKARNRQAAQK - CRIKKKKYLQ - TLQDQVNYTSENKELLQSANDLREEI I KLR  
SPBC29B5.01 EEKRSFLERNRQAALK - CRQKRKQWLS - NLQAKVEFYGNENEILSAQVSALREEIVSLK  
YER045c - - KRARLLERNRIAASK - CRQKRKMSQL - QLQREFDQISKENTMMKKKIENYEKLVQKMK  
YIL036w - - KRARLLERNRIAASK - CRQKRKVAQL - QLQKEFNEIKDENRILLKKNLYYEKLI SKFK  
CE19687 DERRNTILERNKAAAVR - YRKRKKEEHD - DMMGRVQAMEAEKNQLLTQNVLRRELERVT  
Hs13654761 LDKKLKMEQNKTAATR - YRQKKRAEQE - ALTGECKELEKKNEALKERADSLAKEIQYLK  
Hs4502265 LDKKLKMEQNKTAATR - YRQKKRAEQE - ALTGECKELEKKNEALKERADSLAKEIQYLK  
Hs12597625 GDRKQKKRDQNKSAALR - YRQKRRAEGE - ALEGECQGLEARNRELKERAESVEREIQYVK  
7298780 EDRKIRKKEQNKNAATR - YRQKKKLEME - NVLGEEHVLSKENEQLRRTLQERHNEMRYLR  
CE06355 PEKKERKKAQNRLAATR - YREKKRREKE - EAMTCIEGLSVTNGKLDQVSELEREIRYFK  
CE24037 EEILRRKRIQNNLAAAR - YRKRQREARE - SAESELGDLTRRNDELDRDQVSRMEREIDRLK  
CE21280 - - - - RKRQQNKVAAAR - YRDKQKAKWQ - DLLDQLEAEEDRNQRLKLQAGHLEKEVAEMR  
CE08818\_1 EDDYSTKRKRNNNEAVNR - TRQKKRQEEN - DTAEKVDELKKNENETLERKVEQLQKELSFLK  
Hs4502769 SDEYRQRRERNNMAVKK - SRLKSKQKAQ - DTLQRVNQLKEENERLEAKIKLLTKELSVLK  
Hs22046270 SPEYRQRRERNNIAVRK - SRDKAKRRNQ - EMQOKLVELSAENEKLNHRVEQLTRDLAGLR  
Hs4885131 SPEYRQRRERNNIAVRK - SRDKAKRRNQ - EMQOKLVELSAENEKLNHRVEQLTRDLAGLR  
Hs4757972 SNEYRVRRERNNIAVRK - SRDKAKRRNV - ETQOKVLELTSDNDRLRKRVEQLSRELDTLR  
Hs4885129 SDEYKIRRRERNNIAVRK - SRDKAKMRNL - ETQHKVLELTAENERLQKKVEQLSRELDTLR  
Hs4502767 SLEYRLRRERNNIAVRK - SRDKAKRRIL - ETQOKVLELYMAENERLRSRVEQLTQELDTLR  
7291773 TDEYRRRRERNNIAVRK - SREKAKVRSR - EVEERVKSLLKEKDALIRQLGEMTNELQLHK  
7294768 DPAYKEKRKKNNEAVQR - TREKTKKSAE - ERKKRIDDLRKQNDALKVQIETSEKHISTLR  
7290320 DAAYYERRRKNNAASK - SRDRRIKED - EIAIRAAYLERQNIELLCQIDALKVQLAAFT  
7290774 DTAYYERRRKNNAASK - SRDRRIKED - EIAIRAAYLERQNIELLCRIDALEVQLAAIT  
Hs4504421 DDKYWARRRKNNMAAKR - SRDARRLKEN - QIAIRASFLEKENSALRQEVADLRKELGKCK  
Hs4507431 DEKYWTRRKNNVAAKR - SRDARRLKEN - QITIRAAFLEKENTALRTEVAELRKEVGKCK  
Hs4503263 DEKYWSRRYKNNEAAKR - SRDARRLKEN - QISVRAAFLEKENALLRQEVAVRQELSHYR  
7295189 DDKYWARRRKNNIAAKR - SRDARRQKEN - QIAMRARYLEKENATLHQEVEQLKQENMDLR  
CE15479 DSAYFERRRKNNDAAKR - SRDARRQKEE - QIASKAHALERENMQLRGKVSLEQEAAQLR  
CE19799 DVAYWERRRKNNDAAKR - SRDQRRMKED - EMAHRATSLERENMLLRVELDQLRAETDKLR  
7302966 DAKYFERRRKNNEAAKR - SRDARKIRED - RIAFRAALLEQENSILRAQVLALRDELQTVR  
7296965 DESYWDRRRRKNNEAAKR - SREKRRYNDM - VLEQRVIELTKENHVLAQLDAIRDKFN - - -  
Hs4885517 DAMYWEKRRKNNEAAKR - SREKRRNLNDL - VLENKLIALGEENATLKAELLSLK - - - - -  
CE22330 DEAYLDRRRRKNNEAARK - SRESRKKVDQ - DNSVRVTYLERENQCLRVYVQQLQQLQNESMR  
CE01256 SPKYLEKRMKNNEAASK - SRASRKHREQ - KNQ TENELLKRKNAALEEELKQAKCELAQM  
7291864 RSRDEDCMERRRAAASR - YRNKMRNEHK - DLIKQNAQLQEQENQELHERISRLEKELQOHR

: .

At3g17610\_1 GMLPLL  
At5g11260 HILKNT  
Hs19745184 - - - - -  
Hs4758054 - - - - -  
Hs8393194 - - - - -  
Hs4885073 - - - - -  
7293451 ND - - - -  
CE24265 - - - - -

|               |        |
|---------------|--------|
| CE24266       | -----  |
| Hs15298466    | SENQRL |
| Hs6671585     | SENQRL |
| Hs20631977    | AENSEL |
| 7302252       | -----  |
| 7294270       | SQLHKL |
| Hs16418355    | QQLQKL |
| CE01814       | QKLHQY |
| Hs14211949    | EQLKKL |
| Hs18702325    | AQLRQL |
| Hs20127492    | DQLRKL |
| CE11300       | SQLKKL |
| CE01056       | -----  |
| Hs14110395    | VENQEL |
| 7291250       | AKNHKL |
| CE17828       | -----  |
| Hs14775169    | SKYEAL |
| Hs4505073     | SKYEAL |
| Hs4505075     | SKYEAL |
| Hs6912490     | GKCEAL |
| 7302350       | NKYKAL |
| Hs14770839    | VKCEKL |
| Hs4885447     | VKCEKL |
| Hs5453736     | EKYEKL |
| Hs5453802     | ARCDRL |
| Hs21361118    | RALIDR |
| HsM4758132    | RALIDR |
| Hs20149576    | KQLSTL |
| Hs5453774     | QQLTEL |
| Hs21918831    | QKLHDL |
| HsM5731347    | QKLHDL |
| Hs4505379     | QKVQSL |
| 7300970       | NKFAML |
| Hs13540490    | -----  |
| Hs4502353     | QNLTGL |
| Hs10938014    | QKVLSH |
| Hs4758616     | QKVMNH |
| Hs4504809     | QKVMTH |
| 7303798       | QQVMEH |
| CE16461       | RTVEHH |
| YEL009c       | K----- |
| Hs4502263     | YMLNLH |
| Hs4755128     | Y----- |
| Hs18497306    | LMLNRH |
| 7290135       | DMLKSH |
| Hs5453563     | SVLNSH |
| Hs8924246     | EALKEH |
| Hs4885245     | FMLVAH |
| Hs5803017     | FVLVAH |
| Hs4885241     | FILAAH |
| Hs4885243     | LVLEAH |
| 7301826       | YLLATH |
| CE27375       | NYLETH |
| Hs4503033     | QLLLAH |
| Hs5802980     | QLLLAH |
| Hs4758500     | QLLLTH |
| SPAC21E11.03c | SQLLAH |

|              |        |
|--------------|--------|
| SPBC2F12.09c | NQLLAH |
| SPAC22F3.02  | TLVFAH |
| SPBC29B5.01  | TLLIAH |
| YER045c      | KISRLH |
| YIL036w      | -----  |
| CE19687      | ALLTER |
| Hs13654761   | DLIEEV |
| Hs4502265    | DLIEEV |
| Hs12597625   | DLLIEV |
| 7298780      | QLIREF |
| CE06355      | KFMTEM |
| CE24037      | Q----- |
| CE21280      | QAFLAK |
| CE08818_1    | EMFMAY |
| Hs4502769    | DLFLEH |
| Hs22046270   | QFFKQL |
| Hs4885131    | QFFKQL |
| Hs4757972    | GIFRQL |
| Hs4885129    | NLFKQL |
| Hs4502767    | NLFRQI |
| 7291773      | QIYML  |
| 7294768      | DLI--- |
| 7290320      | S----- |
| 7290774      | S----- |
| Hs4504421    | NILAKY |
| Hs4507431    | TIVSKY |
| Hs4503263    | AVLSRY |
| 7295189      | ARLSKF |
| CE15479      | -----  |
| CE19799      | ALILTT |
| 7302966      | QLLGAT |
| 7296965      | -----  |
| Hs4885517    | -----  |
| CE22330      | QHL--- |
| CE01256      | ITIRDM |
| 7291864      | S----- |
