# Supplementary material
Source: PubMed Central journal article supplement (PMC1183107)
Supplement: nar_33_14_4455__5.pdf [file nar_33_14_4455__5.pdf]

CLUSTAL W (1.83) multiple sequence alignment

```
KNIR_DROVI          CKVCGEPAAGFHFGAFTCEGCKSFFGRSYNNIST-----ISECKN-----DGKCIID
NP_524187.1        CKVCGEPAAGFHFGAFTCEGCKSFFGRSYNNIST-----ISECKN-----EGKCIID
NP_788552.1        CKVCGEPAAGFHFGAFTCEGCKSFFGRSYNNLSS-----ISDCKN-----NGECIIN
EGON_DROME         CKVCGEPAAGFHFGAFTCEGCKSFFGRTYNNIAA-----IAGCKH-----NGDCVIN
1411299B          CVVCGDKATGYHYRCITCEGCKGFFRRTIQKNLH-----PTYSCKYD-----SCCVID
CAA68539.1        CVVCGDKATGYHYRCITCEGCKGFFRRTIQKNLH-----PTYSCKYD-----SCCVID
THA1_SHEEP        CVVCGDKATGYHYRCITCEGCKGFFRRTIQKNLH-----PTYSCKYD-----SCCVID
THA_MOUSE         CVVCGDKATGYHYRCITCEGCKGFFRRTIQKNLH-----PTYSCKYD-----SCCVID
THA_PIG           CVVCGDKATGYHYRCITCEGCKGFFRRTIQKNLH-----PTYSCKYD-----SCCVID
NP_990644.1       CVVCGDKATGYHYRCITCEGCKGFFRRTIQKNLH-----PTYSCKYD-----GCCVID
THA_CAIMO         CVVCGDKATGYHYRCITCEGCKGFFRRTIQKNLH-----PTYSCKYD-----GCCVID
THA_APTPA         CVVCGDKATGYHYRCITCEGCKGFFRRTIQKNLH-----PTYSCKYD-----GCCVID
ERBA_AVIER        CVVCGDKATGYHYRCITCEGCKSFFRRTIQKNLH-----PTYSCTYD-----GCCVID
THA_PYGAD         CVVCGDKATGYHYRCITCAGCKGFFRRTIQKNLH-----PTYSCKYD-----GCCVID
THAB_XENLA        CVVCSDKATGYHYRCITCEGCKGFFRRTIQKNLH-----PSYSCKYD-----GCCIID
THA_RANCA         CVVCSDKATGYHYRCITCEGCKGFFRRTIQKNLH-----PSYSCKYD-----GCCIID
THAA_XENLA        CVVCSDKATGYHYRCITCEGCKGFFRRTIQKNLH-----PSYSCKYD-----GCCIID
NP_571471.1       CVVCGDKATGYHYRCITCEGCKGFFRRTIQKNLH-----PSYSCKYD-----SCC IID
THAB_PAROL        CVVCGDKATGYHYRCITCEGCKGFFRRTIQKNLH-----PSYSCKYD-----CCCIID
THA_SALSA         CVVCGDKATGYHYRCITCEGCKGFFRRTIQKNLH-----PAYSCKYD-----GCCIID
THAA_PAROL        CVVCGDKATGYHYRCITCEGCKGFFRRTIQKNLH-----PSYSCKYE-----GCCIID
THA_HIPHI         CVVCGDKATGYHYRCITCEGCKGFFRRTIQKNLH-----PAYSCKYE-----GCCIID
NP_000452.2       CVVCGDKATGYHYRCITCEGCKGFFRRTIQKNLH-----PSYSCKYE-----GKCVID
THB2_HUMAN        CVVCGDKATGYHYRCITCEGCKGFFRRTIQKNLH-----PSYSCKYE-----GKCVID
NP_033406.1       CVVCGDKATGYHYRCITCEGCKGFFRRTIQKSLH-----PSYSCKYE-----GKCIID
THB2_RAT          CVVCGDKATGYHYRCITCEGCKGFFRRTIQKSLH-----PSYSCKYE-----GKCIID
THB1_MOUSE        CVVCGDKATGYHYRCITCEGCKGFFRRTIQKSLH-----PSYSCKYE-----GKCIID
THB1_RAT          CVVCGDKATGYHYRCITCEGCKGFFRRTIQKSLH-----PSYSCKYE-----GKCIID
THB1_SHEEP        CVVCGDKATGYHYRCITCEGCKGFFRRTIQKNLH-----PSYSCKYE-----GKCVID
THB_CHICK         CVVCGDKATGYHYRCITCEGCKGFFRRTIQKNLH-----PTYSCKYE-----GKCVID
THBA_XENLA        CVVCGDKATGYHYRCITCEGCKGFFRRTIQKNLH-----PSYSCKYE-----GKCVID
THB_RANCA         CVVCGDKATGYHYRCITCEGCKGFFRRTIQKNLH-----PSYSCKYE-----GKCVID
THBB_XENLA        CVVCGDKATGYHYRCITCEGCKGFFRRTIQKNLH-----PSYSCKYE-----GKCVID
NP_571415.1       CVVCGDKATGYHYRCITCEGCKGFFRRTIQKNLN-----PTYACKYE-----GKCVID
THB_PAROL         CVVCGDKATGYHYRCITCEGCKGFFRRTIQKNLN-----PTYACKYE-----GKCVID
NHR1_ONCVO        CVVCGDDATGLHYRAITCEGCKGFFRRTVQQKI-----VYKCKSI-----ERCEIS
NP_000367.1       CGVCGDRATGFHFNAMTCEGCKGFFRRSMKRKA-----LFTCPFN-----GDCRIT
VDR_BOVIN         CGVCGDRATGFHFNAMTCEGCKGFFRRSMKRKA-----LFTCPFN-----GDCRIT
AAK48863.1        CGVCGDRATGFHFNAMTCEGCKGFFRRSMKRKA-----LFTCPFN-----GDCRIT
NP_058754.1       CGVCGDRATGFHFNAMTCEGCKGFFRRSMKRKA-----LFTCPFN-----GDCRIT
VDR_MOUSE         CGVCGDRATGFHFNAMTCEGCKGFFRRSMKRKA-----LFTCPFN-----GDCRIT
NP_990429.1       CGVCGDRATGFHFNAMTCEGCKGFFRRSMKRKA-----MFTCPFN-----GDCKIT
VDR_COTJA         CGVCGDRATGFHFNAMTCEGCKGFFRRSMKRKA-----MFTCPFS-----GDCKIT
VDR_XENLA         CGVCGDKATGFHFNAMTCEGCKGFFRRSMKRKA-----MFTCPFN-----GDCRIT
NP_035066.1       CRVCGDKANGYHFNVMTCGCKGFFRRAMKRN-----RLRCPFRK-----GTCEIT
NP_443212.1       CRVCGDKANGYHFNVMTCGCKGFFRRAMKRN-----RLRCPFRK-----GTCEIT
CAB55489.1        CRVCGDKATGYHFNVMTCGCKGFFRRAMKRNA-----RLRCPFRK-----GACEIT
AAM76230.1        CVVCGDQATGYHFHALTCEGCKGFFRRTVSKSI-----GPTCPFA-----GSCEVS
NP_005113.1       CVVCGDQATGYHFHALTCEGCKGFFRRTVSKSI-----GPTCPFA-----GSCEVS
NP_033933.1       CVVCGDRATGYHFHALTCEGCKGFFRRTVSKTI-----GPICPFA-----GRCEVS
NP_075230.1       CVVCGDRATGYHFHALTCEGCKGFFRRTVSKTI-----GPICPFA-----GRCEVS
BAD00038.1        CMVCGDRATGYHFHALTCEGCKGFFRRTVSKNT-----GLTCPFA-----GSCKVN
BAD00039.1        CMVCGDRATGYHFHALTCEGCKGFFRRTVSKNT-----GLTCPFA-----GNCKVN
NH48_CAEL         CRVCGDKAFSYNFNVITCESCKAFFRRNANKEK-----EIRCPFN-----EQCEIN
```

NP\_524493.1 CAVCGDKALGYNFNAVTCESCKAFFRRNALAKK-----QFTCPFN-----QNCDIT  
NP\_741445.1 CTVCSDRANGYNFVGLTTCESCKAFFRRNASKHK-----EIKCPFS-----DSCQIT  
AAD16050.1 CSVCGDKASGFHYNVLSCEGCKGFFRRSVIKG-----ARYVCHSG-----GHCPMD  
NP\_113815.1 CSVCGDKASAFHYNVLSCEGCKGFFRRSVIKG-----ARYICHSG-----GHCPMD  
NRH3\_HUMAN CSVCGDKASGFHYNVLSCEGCKGFFRRSVIKG-----AHYICHSG-----GHCPMD  
NP\_033499.1 CRVCGDKASGFHYNVLSCEGCKGFFRRSVVHGGA-----GRYACRGS-----GTCQMD  
NRH2\_RAT CRVCGDKASGFHYNVLSCEGCKGFFRRSVVHGGA-----GRYACRGS-----GTCQMD  
NP\_009052.1 CRVCGDKASGFHYNVLSCEGCKGFFRRSVVHGGA-----RRYACRGG-----GTCQMD  
ECR\_AEDAE CLVCGDRESGYHYNALTCESCKGFFRRSVTKN-----AVYCKCFG-----HACEMD  
ECR\_CHITE CLVCGDRASGYHYNALTCESCKGFFRRSVTKN-----AVYCKCFG-----HECEMD  
ECR\_LUCCU CLVCGDRASGYHYNALTCESCKGFFRRSVTKN-----AVYCKCFG-----HACEMD  
NP\_724460.1 CLVCGDRASGYHYNALTCESCKGFFRRSVTKS-----AVYCKCFG-----RACEMD  
ECR\_HELVI CLVCGDRASGYHYNALTCESCKGFFRRSVTKN-----AVYICKFG-----HACEMD  
ECR\_MANSE CLVCGDRASGYHYNALTCESCKGFFRRSVTKN-----AVYICKFG-----HACEMD  
ECR\_BOMMO CLVCGDRASGYHYNALTCESCKGFFRRSVTKN-----AVYICKFG-----HACEMD  
NRH4\_HUMAN CVVCGDRASGYHYNALTCESCKGFFRRSITKN-----AVYKCKNG-----GNCVMD  
NRH4\_MOUSE CVVCGDRASGYHYNALTCESCKGFFRRSITKN-----AVYKCKNG-----GNCVMD  
NP\_068513.1 CVVCGDRASGYHYNALTCESCKGFFRRSITKN-----AVYKCKNG-----GNCVMD  
NP\_004950.2 CPVCGDKVSGYHYGLLTCESCKGFFKRTVQN-----NKHYTCTE-----SQSCKID  
NP\_776828.1 CPVCGDKVSGYHYGLLTCESCKGFFKRTVQN-----NKHYTCTE-----SQSCKID  
NP\_445796.1 CPVCGDKVSGYHYGLLTCESCKGFFKRTVQN-----NKHYTCTE-----SQSCKID  
STF1\_MOUSE CPVCGDKVSGYHYGLLTCESCKGFFKRTVQN-----NKHYTCTE-----SQSCKID  
AAG35648.1 CPVCGDKVSGYHYGLLTCESCKGFFKRTVQN-----NKHYTCTE-----SQSCKID  
STF1\_PIG CPVCGDKVSGYHYGLLTCETCKGFFKRTVQN-----NKHYTCTE-----SQSCKID  
AAK94918.1 CPVCGDKVSGYHYGLLTCESCKGFFKRTVQN-----NKHYTCTE-----SQNCKID  
NP\_990409.1 CPVCGDKVSGYHYGLLTCESCKGFFKRTVQN-----NKRYTCIE-----NQNCQID  
NP\_995582.1 CPVCGDKVSGYHYGLLTCESCKGFFKRTVQN-----NKRYTCIE-----NQNCQID  
NP\_109601.1 CPVCGDKVSGYHYGLLTCESCKGFFKRTVQN-----QKRYTCIE-----NQNCQID  
FTF1\_BOMMO CPVCGDKVSGYHYGLLTCESCKGFFKRTVQN-----KKVYTCVA-----ERACHID  
NP\_524143.2 CPVCGDKVSGYHYGLLTCESCKGFFKRTVQN-----KKVYTCVA-----ERSCHID  
NH25\_CAEEL CPVCGDRVSGYHYGLLTCESCKGFFKRTVQN-----KKQYQCSA-----EANCHVD  
AAA28543.1 CPICGDKISGFHYGIFSCESCKGFFKRTVQN-----RKNYVCVR-----GGPCQVS  
NP\_034394.1 CLICGDRATGLHYGIISCEGCKGFFKRSICN-----KRVYRCR-----DKNCVMS  
NR61\_HUMAN CLICGDRATGLHYGIISCEGCKGFFKRSICN-----KRVYRCR-----DKNCVMS  
AAG09282.1 CLICGDEASGCHYGVLTCGSCKVFFKRAVEG-----QHNYLCAG-----RNDCIID  
PRGR\_SHEEP CLICGDEASGCHYGVLTCGSCKVFFKRAVEG-----QHNYLCAG-----RNDCIID  
PRGR\_RABIT CLICGDEASGCHYGVLTCGSCKVFFKRAVEG-----QHNYLCAG-----RNDCIID  
PRGR\_HUMAN CLICGDEASGCHYGVLTCGSCKVFFKRAVEG-----QHNYLCAG-----RNDCIID  
NP\_032855.1 CLICGDEASGCHYGVLTCGSCKVFFKRAVEG-----QHNYLCAG-----RNDCIID  
NP\_074038.1 CLICGDEASGCHYGVLTCGSCKVFFKRAVEG-----QHNYLCAG-----RNDCIID  
NP\_990593.1 CLICGDEASGCHYGVLTCGSCKVFFKRAVEG-----QHNYLCAG-----RNDCIID  
AAN63590.1 CLICSDEASGCHYGALTCGSCKVFFKRAIEG-----QHNYLCAG-----RNDCIID  
GCR\_SAGOE CLVCSDEASGCHYGVLTCGSCKVFFKRAVEG-----QHNYLCAG-----RNDCIID  
GCR\_SAIBB CLVCSDEASGCHYGVLTCGSCKVFFKRAVEG-----QHNYLCAG-----RNDCIID  
GCR\_AOTNA CLVCSDEASGCHYGVLTCGSCKVFFKRAVEG-----QHNYLCAG-----RNDCIID  
GCR\_SAISC CLVCSDEASGCHYGVLTCGSCKVFFKRAVEG-----QHNYLCAG-----RNDCIID  
NP\_000167.1 CLVCSDEASGCHYGVLTCGSCKVFFKRAVEG-----QHNYLCAG-----RNDCIID  
GCR\_PIG CLVCSDEASGCHYGVLTCGSCKVFFKRAVEG-----QHNYLCAG-----RNDCIID  
GCR\_TUPGB CLVCSDEASGCHYGVLTCGSCKVFFKRAVEG-----QHNYLCAG-----RNDCIID  
GCR\_RABIT CLVCSDEASGCHYGVLTCGSCKVFFKRAVKG-----QHNYLCAG-----RNDCIID  
GCR\_RAT CLVCSDEASGCHYGVLTCGSCKVFFKRAVEG-----QHNYLCAG-----RNDCIID  
NP\_032199.1 CLVCSDEASVCHYGVLTCGSCKVFFKRAVEG-----QHNYLCAG-----RNDCIID  
GCR\_CAVPO CLVCSDELSGCHYGVLTCGSCKVFFKRAVEG-----QHNYLCAG-----RNDCIID  
GCR\_XENLA CLVCSDEASGCHYGVLTCGSCKVFFKRAVEG-----QHNYLCAG-----RNDCIID  
GCR\_SHEEP CLVCSDEASGCHYGVLTCGSCKVFFKRAVEG-----QH-----  
GCR\_ONCMY CLVCSDEASGCHYGVLTCGSCKVFFKRAVEGWRRARQNTDQHNLYCAG-----RNDCIID  
GCR\_PAROL CLVCSDEASGCHYGVVTCGSCKVFFKRAVEGWRRARQNTDQHNLYCAG-----RNDCIID

MCR\_MOUSE CLVCGDEASGCHYGVVTCGSCKVFFKRAVE-----HNYLCAG-----RNDCIID  
NP\_037263.1 CLVCGDEASGCHYGVVTCGSCKVFFKRAVEG-----QHNYLCAG-----RNDCIID  
MCR\_TUPGB CLVCGDGASGCHYGVVTCGSCKVFFKRAVEG-----QHNYLCAG-----RNDCIID  
MCR\_SAISC CLVCGDEASGCHYGVVTCGSCKVFFKRAVEG-----QHNYLCAG-----RNDCIID  
NP\_000892.1 CLVCGDEASGCHYGVVTCGSCKVFFKRAVEG-----QHNYLCAG-----RNDCIID  
MCR\_XENLA CLVCGDEASGCHYGVVTCGSCKVFFKRAVEGKCSR-----QHSYLCAG-----RNDCIID  
AAG37994.1 CLICGDEASGCHYGALTCGSCKVFFKRAAEG-----KQKYL CAS-----RNDCTID  
ANDR\_EULFC CLICGDEASGCHYGALTCGSCKVFFKRAAEG-----KQKYL CAS-----RNDCTID  
ANDR\_CANFA CLICGDEASGCHYGALTCGSCKVFFKRAAEG-----KQKYL CAS-----RNDCTID  
AAS19691.1 CLICGDEASGCHYGALTCGSCKVFFKRAAEG-----KQKYL CAS-----RNDCTID  
ANDR\_PAPHA CLICGDEASGCHYGALTCGSCKVFFKRAAEG-----KQKYL CAS-----RNDCTID  
ANDR\_MACFA CLICGDEASGCHYGALTCGSCKVFFKRAAEG-----KQKYL CAS-----RNDCTID  
ANDR\_HUMAN CLICGDEASGCHYGALTCGSCKVFFKRAAEG-----KQKYL CAS-----RNDCTID  
ANDR\_PANTR CLICGDEASGCHYGALTCGSCKVFFKRAAEG-----KQKYL CAS-----RNDCTID  
AAM96904.1 CLICGDEASGCHYGALTCGSCKVFFKRAAEG-----KQKYL CAS-----RNDCTID  
ANDR\_RABIT CLICGDEASGCHYGALTCGSCKVFFKRAAEG-----KQKYL CAS-----RNDCTID  
NP\_036634.1 CLICGDEASGCHYGALTCGSCKVFFKRAAEG-----KQKYL CAS-----RNDCTID  
NP\_038504.1 CLICGDEASGCHYGALTCGSCKVFFKRAAEG-----KQKYL CAS-----RNDCTID  
AAP85538.1 CLSCEDEASGCHYEALTCGSCKVFFKRAAEG-----NQKYL CAS-----RNDCTID  
AAQ93376.1 CLVCGDIASGYHYGVASCEACKAFFKRTIQG-----NIEYSCPA-----TNECEIT  
NP\_036065.1 CLVCGDIASGYHYGVASCEACKAFFKRTIQG-----NIEYSCPA-----TNECEIT  
ERR2\_RAT CLVCGDIASGYHYGVASCEACKAFFKRTIQG-----NIEYSCPA-----TNECEIT  
NP\_004443.2 CLVCGDIASGYHYGVASCEACKAFFKRTIQG-----NIEYSCPA-----TNECEIT  
ERR2\_MOUSE CLVCGDIASGYHYGVASCEACKAFFKRTIQG-----NIEYNCPA-----TNECEIT  
ERR1\_HUMAN CLVCGDVASGYHYGVASCEACKAFFKRTIQG-----SIEYSCPA-----SNECEIT  
ERR1\_MOUSE CLVCGDVASGYHYGVASCEACKAFFKRTIQG-----SIEYSCPA-----SNECEIT  
AAS46251.1 CAVCNDYASGYHYGVWSCEGCKAFFKRSIQG-----HNDYMCPA-----TNQCTID  
ESR1\_PIG CAVCNDYASGYHYGVWSCEGCKAFFKRSIQG-----HNDYMCPA-----TNQCTID  
ESR1\_HORSE CAVCNDYASGYHYGVWSCEGCKAFFKRSIQG-----HNDYMCPA-----TNQCTID  
NP\_031982.1 CAVCNDYASGYHYGVWSCEGCKAFFKRSIQG-----HNDYMCPA-----TNQCTID  
NP\_036821.1 CAVCNDYASGYHYGVWSCEGCKAFFKRSIQG-----HNDYMCPA-----TNQCTID  
ESR1\_MESAU CAVCNDYASGYHYGVWSCEGCKAFFKRSIQG-----HNDYMCPA-----TNQCTID  
ESR1\_HUMAN CAVCNDYASGYHYGVWSCEGCKAFFKRSIQG-----HNDYMCPA-----TNQCTID  
ESR1\_XENLA CAVCSDYASGYHYGVWSCEGCKAFFKRSIQG-----HNDYMCPA-----TNQCTID  
ESR1\_POEGU CAVCNDYASGYHYGVWSCEGCKAFFKRSIQG-----HNDYMCPA-----TNQCTID  
NP\_990514.1 CAVCNDYASGYHYGVWSCEGCKAFFKRSIQG-----HNDYMCPA-----TNQCTID  
ESR1\_SHEEP CAVCNDYASGYHYGVWSCEGCKAFFKRSIQG-----HNDYMCPA-----TNQCTID  
ESR1\_OREAU CAVCSDYASGYHYGVWSCEGCKAFFKRSIQG-----HNDYMCPA-----TNQCTID  
ESR1\_ORENI CAVCSDYASGYHYGVWSCEGCKAFFKRSIQG-----HNDYMCPA-----TNQCTID  
ESR1\_ONCMY CAVCSDFASGYHYGVWSCEGCKAFFKRSIQG-----HNDYMCPA-----TNQCTMD  
ESR1\_SALSA CAVCSDFASGYHYGFWSCEGCKAFFKRSIQG-----HNDYMCPA-----TNQCTMD  
ESR1\_PAGMA CAVCSDYASGYHYGVWSCEGCKAFFKRSIQG-----HNDYMCPA-----TNQCTID  
ESR1\_SPAAU CAVCSDYASGYHYGVWSCEGCKAFFKRSIQG-----HNDYMCPA-----TNQCTID  
ESR1\_ORYLA CAVCSDYASGYHYGVWSCEGCKAFFKRSIQG-----HNDYMCPA-----TNQCTID  
BAB16893.1 CAVCSDYASGYHYGVWSCEGCKAFFKRSIQG-----HNDYVCPA-----TNQCTID  
ESR1\_ICTPU CSVCSDYASGYHYGVWSCEGCKAFFKRSIQG-----HNDYVCPA-----TNQCTID  
ERB1\_CARAU CAVCSDYASGYHYGVWSCEGCKAFFKRSIQG-----HNDYICPA-----TNQCTID  
ESR2\_ONCMY CAVCSDYASGYHYGVWSCEGCKAFFKRSIQG-----HNDYICPA-----TNQCTID  
ESR2\_SPAAU CAVCHDYASGYHYGVWSCEGCKAFFKRSIQR-----HNDYICPA-----TNQCTID  
ESR3\_MICUN CAVCHDYASGYHYGVWSCEGCKAFFKRSIQR-----DNEYICPA-----TNECTID  
ESR2\_ORENI CAVCHDYASGYHYGVWSCEGCKAFFKRSIQG-----HNDYICPA-----TNQCTID  
ERB2\_CARAU CAVCHDYASGYHYGVWSCEGCKAFFKRSIQG-----HNDYICPA-----TNQCTID  
ESR2\_ANGJA CAVCHDYASGYHYGVWSCEGCKAFFKRSIQG-----HNGYICPA-----TNQCTID  
ESR2\_MICUN CAVCHDYASGYHYGVWSCEGCKAFFKRSIQG-----HNDYICPA-----TNQCTID  
ESR2\_ICTPU CAVCHDYASGYHYGVWSCEGCKAFFKRSIQG-----HNDYICPA-----TNQCTID  
ESR2\_BOVIN CAVCSDYASGYHYGVWSCEGCKAFFKRSIQG-----HNDYICPA-----TNQCTID  
ESR2\_SHEEP CAVCSDYASGYHYGVWSCEGCKAFFKRSIQG-----HNDYICPA-----TNQCTID

|             |                                                            |
|-------------|------------------------------------------------------------|
| ESR2_MOUSE  | CAVCSDYASGYHYGVWSCEGCKAFFKRSIQG-----HNDYICPA-----TNQCTID   |
| ESR2_RAT    | CPVCSDYASGYHYGVWSCEGCKAFFKRSIQG-----HNDYICPA-----TNQCTID   |
| ESR2_CALJA  | CAVCSDYASGYHYGVWSCEGCKAFFKRSIQG-----HNDYICPA-----TNQCTID   |
| NP_001428.1 | CAVCSDYASGYHYGVWSCEGCKAFFKRSIQG-----HNDYICPA-----TNQCTID   |
| ESR2_PIG    | CAVCSDYASGYHYGVWSCEGCKAFFKRSIQG-----HNDYICPA-----TNQCTID   |
| ESR2_COTJA  | CAVCSDYASGYHYGVWSCEGCKAFFKRSIQG-----HNDYICPA-----TNQCTID   |
| NP_990125.1 | CAVCSDYASGYHYGVWSCEGCKAFFKRSIQG-----HNDYICPA-----TNQCTID   |
| ESR2_STUVU  | CAVCSDYASGYHYGVWSCEGCKAFFKRSIQG-----HNDYICPA-----TNQCTID   |
| CAA42718.1  | CAVCGDNASCQHYGVRTCEGCKGFFKRTVQK-----SAKYICLA-----NKDCPVD   |
| NR41_RAT    | CAVCGDNASCQHYGVRTCEGCKGFFKRTVQK-----SAKYICLA-----NKDCPVD   |
| NP_002126.2 | CAVCGDNASCQHYGVRTCEGCKGFFKRTVQK-----NAKYICLA-----NKDCPVD   |
| NR41_CANFA  | CAVCGDNASCQHYGVRTCEGCKGFFKRTVQK-----NAKYICLA-----NKDCPVD   |
| NR42_XENLA  | CAVCGDNASCQHYGVRTCEGCKGFFKRTVQK-----NAKYICLA-----NKDCPVD   |
| HR38_BOMMO  | CAVCGDTAACQHYGVRTCEGCKGFFKRTVQK-----GSKYVCLA-----EKSCPVD   |
| HR38_DROME  | CAVCGDTAACQHYGVRTCEGCKGFFKRTVQK-----GSKYVCLA-----DKNCPVD   |
| NP_038641.1 | CAVCGDNAACQHYGVRTCEGCKGFFKRTVQK-----NAKYVCLA-----NKNCPPVD  |
| NR42_RAT    | CAVCGDNAACQHYGVRTCEGCKGFFKRTVQK-----NAKYVCLA-----NKNCPPVD  |
| NP_006177.1 | CAVCGDNAACQHYGVRTCEGCKGFFKRTVQK-----NAKYVCLA-----NKNCPPVD  |
| NP_008912.2 | CAVCGDNAACQHYGVRTCEGCKGFFKRTVQK-----NAKYVCLA-----NKNCPPVD  |
| NP_113816.1 | CAVCGDNAACQHYGVRTCEGCKGFFKRTVQK-----NAKYVCLA-----NKNCPPVD  |
| NP_056558.1 | CAVCGDNAACQHYGVRTCEGCKGFFKRTVQK-----NAKYVCLA-----NKNCPPVD  |
| NP_497731.1 | CAVCNDRAVCLHYGARTCEGCKGFFKRTVQK-----NSKYTCAG-----NKTCPID   |
| 7UP2_DROME  | CVVCGDKSSGKHYGQFTCEGCKSFFKRSVRRNLT-----YSCR-----GSRNCPID   |
| NP_524325.1 | CVVCGDKSSGKHYGQFTCEGCKSFFKRSVRRNLT-----YSCR-----GSRNCPID   |
| NP_066285.1 | CVVCGDKSSGKHYGQFTCEGCKSFFKRSVRRNLS-----YTCR-----ANRNCPID   |
| NP_989752.1 | CVVCGDKSSGKHYGQFTCEGCKSFFKRSVRRNLS-----YTCR-----ANRNCPID   |
| NP_542956.1 | CVVCGDKSSGKHYGQFTCEGCKSFFKRSVRRNLS-----YTCR-----ANRNCPID   |
| CAA54096.1  | CVVCGDKSSGKHYGQFTCEGCKSFFKRSVRRNLS-----YTCR-----ANRNCPID   |
| NP_776827.1 | CVVCGDKSSGKHYGQFTCEGCKSFFKRSVRRNLS-----YTCR-----ANRNCPID   |
| NP_005645.1 | CVVCGDKSSGKHYGQFTCEGCKSFFKRSVRRNLT-----YTCR-----ANRNCPID   |
| NP_034281.1 | CVVCGDKSSGKHYGQFTCEGCKSFFKRSVRRNLT-----YTCR-----ANRNCPID   |
| NP_786998.1 | CVVCGDKSSGKHYGQFTCEGCKSFFKRSVRRNLT-----YTCR-----ANRNCPID   |
| NP_571255.1 | CVVCGDKSSGKHYGQFTCEGCKSFFKRSVRRNLT-----YTCR-----ANRNCPID   |
| NP_571261.1 | CMVCGDKSSGKHYGQFTCEGCKSFFKRSVRRNLS-----YTCR-----GNRDCPID   |
| EAR2_MOUSE  | CVVCGDKSSGKHYGVFTCEGCKSFFKRTIRRNLNLS-----YTCR-----SNRDCQID |
| NP_620813.1 | CVVCGDKSSGKHYGVFTCEGCKSFFKRTIRRNLNLS-----YTCR-----SNRDCQID |
| NP_005225.2 | CVVCGDKSSGKHYGVFTCEGCKSFFKRSIRRNLNLS-----YTCR-----SNRDCQID |
| AAH54649.1  | CAICGDRSSGKHYGVYSCEGCKGFFKRTVRKDLNLS-----YTCR-----DNKDCLVD |
| NP_571313.1 | CAICGDRSSGKHYGVYSCEGCKGFFKRTVRKDLNLS-----YTCR-----DNKECLVD |
| NP_035435.1 | CAICGDRSSGKHYGVYSCEGCKGFFKRTVRKDLT-----YTCR-----DNKDCLID   |
| NP_036937.1 | CAICGDRSSGKHYGVYSCEGCKGFFKRTVRKDLT-----YTCR-----DNKDCLID   |
| NP_002948.1 | CAICGDRSSGKHYGVYSCEGCKGFFKRTVRKDLT-----YTCR-----DNKDCLID   |
| RXRA_XENLA  | CAICGDRSSGKHYGVYSCEGCKGFFKRTVRKDLT-----YTCR-----DSKDCMID   |
| NP_571228.1 | CAICGDRSSGKHYGVYSCEGCKGFFKRTVRKDLT-----YTCR-----DNKDCMID   |
| RXRA_BRARE  | CAICGDRSSGKHYGVYSCEGCKGFFKRTIRKDLT-----YTCR-----DNKDCQID   |
| NP_008848.1 | CAICGDRSSGKHYGVYSCEGCKGFFKRTIRKDLI-----YTCR-----DNKDCLID   |
| NP_033133.1 | CAICGDRSSGKHYGVYSCEGCKGFFKRTIRKDLI-----YTCR-----DNKDCLID   |
| NP_990625.1 | CAICGDRSSGKHYGVYSCEGCKGFFKRTIRKDLI-----YTCR-----DNKDCLID   |
| RXRG_XENLA  | CAICGDRSSGKHYGVYSCEGCKGFFKRTIRKDLV-----YTCR-----DSKDCLID   |
| NP_035436.1 | CAICGDRSSGKHYGVYSCEGCKGFFKRTIRKDLT-----YSCR-----DNKDCTVD   |
| RXRB_RAT    | CAICGDRSSGKHYGVYSCEGCKGFFKRTIRKDLT-----YSCR-----DNKDCTVD   |
| S37781      | CAICGDRSSGKHYGVYSCEGCKGFFKRTIRKDLT-----YSCR-----DNKDCTVD   |
| USP_BOMMO   | CSICGDRASGKHYGVYSCEGCKGFFKRTVRKDLT-----YACR-----EDKNCIID   |
| USP_MANSE   | CSICGDRASGKHYGVYSCEGCKGFFKRTVRKDLT-----YACR-----EDRNCIID   |
| USP_CHOFU   | CSICGDRASGKHYGVYSCEGCKGFFKRTVRKDLNLS-----YACR-----EERNCIID |
| NP_476781.1 | CSICGDRASGKHYGVYSCEGCKGFFKRTVRKDLT-----YACR-----ENRNCIID   |
| NP_059019.1 | CVVCGDKASGRHYGAVSCEGCKGFFKRSVRKNLT-----YSCR-----SSQDCIIN   |

|             |                                                           |
|-------------|-----------------------------------------------------------|
| TR4_MOUSE   | CVVCGDKASGRHYGAVSCEGCKGFFKRSVRKNLT-----YSCR-----SSQDCIIN  |
| TR4_HUMAN   | CVVCGDKASGRHYGAVSCEGCKGFFKRSVRKNLT-----YSCR-----SNQDCIIN  |
| TR2_HUMAN   | CVVCGDKASGRHYGAVTCEGCKGFFKRSIRKNLV-----YSCR-----GSKDCIIN  |
| HR78_DROME  | CLVCGDRASGRHYGAISCEGCKGFFKRSIRKQLG-----YQCR-----GAMNCEVT  |
| NH41_CAEEL  | CVVCGDKASGRHYGAVSCEGCKGFFKRSIRKRIG-----YVCR-----SQKDCPVT  |
| NP_003260.1 | CKVCGDRSSGKHYGVYACDGCSGFFKRSIRRNR-----YVCK---SGNQGGCPVD   |
| NP_689415.1 | CKVCGDRSSGKHYGVYACDGCSGFFKRSIRRNR-----YVCK---SGNQGGCPVD   |
| NP_990501.1 | CKVCGDRSSGKHYGVYACDGCSGFFKRSIRRNR-----YVCK---SGNQGGCPVD   |
| NR21_ORYLA  | CKVCGDRSSGKHYGVYACDGCSGFFKRSIRRNR-----YLCK---SGSQGGCPVD   |
| NR21_XENLA  | CKVCGDRSSGKHYGVYACDGCSGFFKRSIRRNR-----YVCK---SGNQGGCPVD   |
| NP_524596.1 | CKVCRDHSSGKHYGIYACDGCAGFFKRSIRRSRQ-----YVCK---SQKQGLCVVD  |
| TLL_DROVI   | CKVCRDHSSGKHYGIYACDGCAGFFKRSIRRSRQ-----YVCK---SQKQGLCVVD  |
| NP_502094.1 | CRVCGDHSSGKHYGIFSCDGCAGFFKRSIRRRHQ-----YVCKNKGSPSEGCCKVD  |
| NP_038736.1 | CRVCGDSSSGKHYGIYACNGCSGFFKRSVRRRLI-----YRCQ---VGAGMCPVD   |
| NP_055064.1 | CRVCGDSSSGKHYGIYACNGCSGFFKRSVRRRLI-----YRCQ---VGAGMCPVD   |
| NP_497074.1 | CAVCGDVALGKHYGVNACNGCKGFFRRSIWKNRT-----YACR-----HGGKCLVA  |
| NP_501775.1 | CDVCGDVAFGKHYGINACNGCKGFFRRSVWSRRQ-----YSCR-----FGGDCPVV  |
| CAA54248.1  | CAICGDRATGKHYGASSCDGCKGFFRRSVRKNHM-----YSCR-----SRQCVVD   |
| NP_032287.1 | CAICGDRATGKHYGASSCDGCKGFFRRSVRKNHM-----YSCR-----SRQCVVD   |
| NP_071516.1 | CAICGDRATGKHYGASSCDGCKGFFRRSVRKNHM-----YSCR-----SRQCVVD   |
| HN4A_XENLA  | CAICGDRATGKHYGASSCDGCKGFFRRSVRKNHM-----YSCR-----SRQCVVD   |
| HN4B_XENLA  | CAICGDRATGKHYGASSCDGCKGFFRRSVRKNHV-----YACR-----SRQCIVD   |
| HN4G_HUMAN  | CAICGDRATGKHYGASTCDGCKGFFRRSIRKSHI-----YSCR-----SRQCVVD   |
| HN4G_MOUSE  | CAICGDRATGKHYGASSCDGCKGFFRRSIRKSHV-----YSCR-----SRQCVVD   |
| S36218      | CAICGDRATGKHYGASSCDGCKGFFRRSVRKNHQ-----YTCT-----ARNCVVD   |
| NP_492615.2 | CHICNDKSTGKHYGAI SCDGCKGFFRRSIRKRYH-----YQCR-----EQNCDVT  |
| NP_491103.1 | CAICGDRATGKHYGAMSCDGCCKGFFRRTIRKRHS-----YVCR-----GEKQVD   |
| NH35_CAEEL  | CHICSDVATGRHYGAIACNGCKGFFRRTVRRNRYE-----YHCR-----ESKCEID  |
| NP_496066.2 | CLICGEPSTGKHYGIVACLGCKTFFRRAVQRQD-----TECKR-----EKPCDVT   |
| NH14_CAEEL  | CVVCGDKAIGKHYGAVACNGCKGFFRRSVWQNLQ-----YTCT-----NKQCNID   |
| NP_492612.1 | CAVCGDKSTGTHYGVISCNCGCKGFFRRTVLRDQK-----FTCR-----NKRCVID  |
| NHR1_CAEEL  | CAVCSDLATGYHYGVASCNGCKTFFRRTIVSEQT-----FICQY-----NGNCDVN  |
| NP_498554.1 | CLVCSDISTGYHYGVPSNCGCKTFFRRTIMKNQT-----FSCQF-----QGKCPVD  |
| NP_504455.1 | CAVCCDIATGKHYSVASCNGCKTFFRRALVNNRE-----FVCQG-----NKDCPVN  |
| NH40_CAEEL  | CVVCSDFASGIHYSVASCNGCKTFFRRALVKNQT-----FTCQF-----SGDCVVG  |
| NP_502117.2 | CAVCGDTPAKIHYGVLACFGCKGFFRRAVKDGRNK-----YVCR-----EKNCEVT  |
| NP_741456.1 | CAVCGDGIAKLHYGVLACYGCKGFFRRTLT -GKYR-----YACR-----SNNCIVD |
| NP_510423.1 | CSVCCDEASGRHYGVVACFGCKGFFRRTVRAGKN-----YVCRY-----SKKCRID  |
| NP_000957.1 | CFVCNDKSSGYHYGVSSCEGCKGFFRRSIQKN-----MVYT-CHR-----DKNCIIN |
| RRG2_HUMAN  | CFVCNDKSSGYHYGVSSCEGCKGFFRRSIQKN-----MVYT-CHR-----DKNCIIN |
| RRG2_MOUSE  | CFVCNDKSSGYHYGVSSCEGCKGFFRRSIQKN-----MVYT-CHR-----DKNCIIN |
| A34714      | CFVCNDKSSGYHYGVSSCEGCKGFFRRSIQKN-----MVYT-CHR-----DKNCIIN |
| RRG_NOTVI   | CFVCNDKSSGYHYGVSSCEGCKGFFRRSIQKN-----MVYT-CHR-----DKNCQIN |
| RRG_XENLA   | CFVCNDKSSGYHYGVSSCEGCKGFFRRSIQKN-----MVYT-CHR-----DKNCQIN |
| AAB59953.1  | CFVCQDKSSGYHYGVSSCEGCKGFFRRSIQKN-----MVYT-CHR-----DKNCQIN |
| NP_571414.1 | CFVCQDKSSGYHYGVSSCEGCKGFFRRSIQKN-----MVYT-CHR-----DKNCQIN |
| AAD05222.1  | CFVCQDKSSGYHYGVSSCEGCKGFFRRSIQKN-----MVYT-CHR-----DKNCIIN |
| RRA_MOUSE   | CFVCQDKSSGYHYGVSSCEGCKGFFRRSIQKN-----MVYT-CHR-----DKNCIIN |
| NP_989867.1 | CFVCQDKSSGYHYGVSSCEGCKGFFRRSIQKN-----MVYT-CHR-----DKNCIIN |
| RRA_XENLA   | CFVCQDKSSGYHYGVSSCEGCKGFFRRSIQKN-----MVYT-CHR-----DKNCIIN |
| RRA_NOTVI   | CFVCQDKSSGYHYGVSSCEGCKGFFRRSIQKN-----MVYT-CHR-----DKTCIIN |
| RRB_COTJA   | CFVCQDKSSGYHYGVSSCEGCKGFFRRSIQKN-----MVYT-CHR-----DKNCVIN |
| S13512      | CFVCQDKSSGYHYGVSSCEGCKGFFRRSIQKN-----MVYT-CHR-----DKNCVIN |
| RRB_HUMAN   | CFVCQDKSSGYHYGVSSCEGCKGFFRRSIQKN-----MIYT-CHR-----DKNCVIN |
| RRB_MOUSE   | CFVCQDKSSGYHYGVSSCEGCKGFFRRSIQKN-----MIYT-CHR-----DKNCVIN |
| RRB_NOTVI   | CFVCQDKSSGYHYGVSSCEGCKGFFRRSIQKN-----MIYT-CHR-----DKNCVIN |
| RRA_FUGRU   | CFVCQDKSSGYHYGVSSCEGCKGFFRRSIQKN-----MVYT-CHR-----EKNCIIN |

AAA19972.1 CRVCGDKASGFHYGVHACEGCKGFFRRTIRMK-----LEYEKCDR-----I--CKIQ  
NP\_006229.1 CRVCGDKASGFHYGVHACEGCKGFFRRTIRMK-----LEYEKCDR-----S--CKIQ  
CAA40856.1 CRICGDKASGYHYGVHACEGCKGFFRRTIRLK-----LVYDKCDR-----S--CKIQ  
NP\_037328.1 CRICGDKASGYHYGVHACEGCKGFFRRTIRLK-----LAYDKCDR-----S--CKIQ  
CAA68898.1 CRICGDKASGYHYGVHACEGCMGFFRRTIRLK-----LVYDKCDR-----S--CKIQ  
PPAR\_PHACI CRICGDKASGYHYGVHACEGCKGFFRRTIRLK-----LAYDKCDR-----S--CKIQ  
PPAR\_CANFA CRICGDRASGYHYGVHACEGCKGFFRRTIRLK-----LAYDKCDR-----S--CKIQ  
PPAR\_CAVPO CRICGDKASGYHYGVHACEGCKGFFRRTIRLK-----LVYDKCDR-----S--CKIQ  
PPAR\_XENLA CRVCSDKASGFHYGVHACEGCKGFFRRTIRLK-----LVYDRCDR-----M--CKIQ  
PPAS\_XENLA CKICGDRASGFHYGVHACEGCKGFFRRTIRMR-----LQYEHCDR-----N--CKIQ  
NP\_851367.1 CRVCGDKASGFHYGVHACEGCKGFFRRTIRLK-----LIYDRCDL-----N--CRIH  
PPAT\_PIG CRVCGDKASGFHYGVHACEGCKGFFRRTIRLK-----LIYDRCDL-----N--CRIH  
PPAT\_CRIGR CRVCGDKASGFHYGVHACEGCKGFFRRTIRLK-----LIYDRCDL-----N--CRIH  
PPAT\_MACMU CRVCGDKASGFHYGVHACEGCKGFFRRTIRLK-----LIYDRCDL-----N--CRIH  
CAA73382.2 CRVCGDKASGFHYGVHACEGCKGFFRRTIRLK-----LIYDRCDL-----N--CRIH  
NP\_056953.2 CRVCGDKASGFHYGVHACEGCKGFFRRTIRLK-----LIYDRCDL-----N--CRIH  
NP\_035276.1 CRVCGDKASGFHYGVHACEGCKGFFRRTIRLK-----LIYDRCDL-----N--CRIH  
PPAT\_RABIT CRVCSDKASGFHYGVHACEGCKGFFRRTIRLK-----LIYDRCDL-----N--CRIH  
PPAT\_XENLA CRVCGDKASGFHYGVHACEGCKGFFRRTIRLK-----LIYERCDL-----N--CRIH  
CAB53540.1 CKVCGDVASGFHYGVLACEGCKGFFRRSIQQN-----IQYKRCLK-----NENCSIV  
NP\_665718.1 CKVCGDVASGFHYGVHACEGCKGFFRRSIQQN-----IQYKRCLK-----NENCSIV  
NP\_035714.2 CKVCGDVASGFHYGVHACEGCKGFFRRSIQQN-----IQYKCLK-----NENCSIM  
NRD2\_HUMAN CKVCGDVASGFHYGVHACEGCKGFFRRSIQQN-----IQYKCLK-----NENCSIM  
NRD2\_RAT CKVCGDVASGFHYGVHACEGCKGFFRRSIQQN-----IQYKCLK-----NENCSIM  
E75\_CHOFU CRVCGDKASGFHYGVHSCGCKGFFRRSIQQK-----IQYRPCTK-----NQQCSIL  
E75\_MANSE CRVCGDKASGFHYGVHSCGCKGFFRRSIQQK-----IQYRPCTK-----NQQCSIL  
E75A\_DROME CRVCGDKASGFHYGVHSCGCKGFFRRSIQQK-----IQYRPCTK-----NQQCSIL  
E75\_GALME CRVCGDKASGFHYGVHSCGCKGFFRRSIQQK-----IQYRPCTK-----NQQCSIL  
E75\_METEN CRVCGDKASGFHYGVHSCGCKGFFRRSIQQK-----IQYRPCTK-----NQQCSIL  
E75C\_DROME CRVCGDKASGFHYGVHSCGCKGFFRRSIQQK-----IQYRPCTK-----NQQCSIL  
NP\_493284.1 CQVCSDKASGFHYGVFACEGCKGFFRRSIQQK-----ITYRACTR-----AEDCLIL  
AAH14804.1 CKICGDKSSGIHYGVITCEGCKGFFRRSQQCN-----VAYS-CTR-----QQNCPID  
RORG\_HUMAN CKICGDKSSGIHYGVITCEGCKGFFRRSQRCN-----AAYS-CTR-----QQNCPID  
AAH58269.1 CKICGDKSSGIHYGVITCEGCKGFFRRSQQNN-----ASYS-CPR-----QRNCLID  
RORB\_RAT CKICGDKSSGIHYGVITCEGCKGFFRRSQQNN-----ASYS-CPR-----QRNCLID  
RORB\_HUMAN CKICGDKSSGIHYGVITCEGCKGFFRRSQQNN-----ASYS-CPR-----QRNCLID  
NP\_038674.1 CKICGDKSSGIHYGVITCEGCKGFFRRSQQSN-----ATYS-CPR-----QKNCLID  
NP\_599022.1 CKICGDKSSGIHYGVITCEGCKGFFRRSQQSN-----ATYS-CPR-----QKNCLID  
HR3\_GALME CKVCGDKSSGVHYGVITCEGCKGFFRRSQSTV-----VNYQ-CPR-----NKACVVD  
HR3\_MANSE CKVCGDKSSGVHYGVITCEGCKGFFRRSQSTV-----VNYQ-CPR-----NKACVVD  
NP\_788303.1 CKVCGDKSSGVHYGVITCEGCKGFFRRSQSSV-----VNYQ-CPR-----NKQCVVD  
NP\_740887.1 CKVCGDKSSGVHYGVITCEGCKGFFRRSQSSI-----VNYQ-CPR-----QKNCVVD  
E78A\_DROME CKVCGDKASGYHYGVTSCEGCKGFFRRSIQKQ-----IEYR-CLR-----DGKCLVI  
NP\_509713.2 CKVCGDKASGYHYGVTSCEGCKGFFRRSIQRK-----IDYR-CLK-----QQVCEIK  
NHR2\_CAEEL CMVCGDNSTGYHYGVQSCEGCKGFFRRSVHKN-----IAYV-CTK-----GENCTFS  
NP\_494785.1 CAICQESAEGFHFHGAACRACAAFFRRTVSNR-----KTYSCQG-----NNDCDVT  
NP\_503561.2 CSICREDGDGYHFGAEACRACAAFFRRSVSLD-----KTYLRCG-----NNDCEIT  
NP\_505589.1 CAVCNEVDGLHFGAEACRACAAFFRRSVALS-----KKEYCRA-----GRNCEVS  
NP\_510659.1 CSVCGEAGDGAHFGAEACRACAAFFRRSVALN-----KAYVCRA-----MGTCVIQ  
NP\_741644.1 CLICCEVADGHHFGAAACRACAAFFRRTVQLN-----KVHDCPK-----NGQCFIL  
NP\_504771.1 CLICGDSADSLHFGALSCRACAAFFRRKAVGR-----RNIFRRC-----DRQCKVD  
NP\_503608.2 CEVCGDKTSGRHFVMSRACAAFFRRAATWN-----LEKRICP-----NGTCHTS  
NP\_507680.1 CKVCGDTGNGMHFGAFTCRACAAFFRRAASRK-----FLR-----KGENH

\* \* : : : \* \* \* \*

KNIR\_DROVI KKN-----RTTCKACRLRKCYNVGMCKGG-----SRYGRRSNWFK  
NP\_524187.1 KKN-----RTTCKACRLRKCYNVGMCKGG-----SRYGRRSNWFK

|             |                                                           |
|-------------|-----------------------------------------------------------|
| NP_788552.1 | KKN-----RTACKACRLKCKLMVGMKSKSG-----SRYGRRSNWFK            |
| EGON_DROME  | KKN-----RTACKACRLRCKLLVGMKSKSG-----SRYGRRSNWFK            |
| 1411299B    | KIT-----RNQCQLCRFKKCI AVAMAMD L----VLDD S-----KRV-AKRKLIE |
| CAA68539.1  | KIT-----RNQCQLCRFKKCI AVAMAMD L----VLDD S-----KRV-AKRKLIE |
| THA1_SHEEP  | KIT-----RNQCQLCRFKKCI AVGMAMD L----VLDD S-----KRV-AKRKLIE |
| THA_MOUSE   | KIT-----RNQCQLCRFKKCI AVGMAMD L----VLDD S-----KRV-AKRKLIE |
| THA_PIG     | KIT-----RNQCQLCRFKKCI AVGMAMD L----VLDD S-----KRV-AKRKLIE |
| NP_990644.1 | KIT-----RNQCQLCRFKKCI SVGMAMD L----VLDD S-----KRV-AKRKLIE |
| THA_CAIMO   | KIT-----RNQCQLCRFKKCI SVGMAMD L----VLDD S-----KRV-AKRKLIE |
| THA_APTPA   | KIT-----RNQCQLCRFKKCI SVGMAMD L----VLDD S-----KRV-AKRKLIE |
| ERBA_AVIER  | KIT-----RNQCQLCRFKKCI SVGMAMD L----VLDD S-----KRV-AKRKLIE |
| THA_PYGAD   | KIT-----RNQCQLCRFKKCI SVGMAMD L----VLYD S-----KRV-AKRKLIE |
| THAB_XENLA  | KIT-----RNQCQLCRFKKCI AVGMAMD L----VLDD S-----KRV-AKRKLIE |
| THA_RANCA   | KIT-----RNQCQLCRFKKCI AVGMAMD L----VLDD S-----KRV-AKRKLIE |
| THAA_XENLA  | KIT-----RNQCQLCRFKKCI AVGMAMD L----VLDD G-----KRV-AKRKLIE |
| NP_571471.1 | KIT-----RNQCQLCRFRKCI SVGMAMD L----VLDD S-----KRV-AKRRLIE |
| THAB_PAROL  | KIT-----RNQCQLCRFKKCI AVGMAMD L----VLDD S-----KRV-AKRRLIE |
| THA_SALSA   | KIT-----RNQCQLCRFRKCI AVCMAMD L----VLDD S-----KRV-AKRRLIE |
| THAA_PAROL  | KIT-----RNQCQLCRFKKCI SVGMAMD L----VLDD S-----KRV-AKRRLIE |
| THA_HIPHI   | KIT-----RNQCQLCRFKKCI SVGMAMD L----VLDD S-----KRV-AKRRLIE |
| NP_000452.2 | KVT-----RNQCQECRFKCCI YVGMATD L----VLDD S-----KRL-AKRKLIE |
| THB2_HUMAN  | KVT-----RNQCQECRFKCCI YVGMATD L----VLDD S-----KRL-AKRKLIE |
| NP_033406.1 | KVT-----RNQCQECRFKCCI YVGMATD L----VLDD S-----KRL-AKRKLIE |
| THB2_RAT    | KVT-----RNQCQECRFKCCI YVGMATD L----VLDD S-----KRL-AKRKLIE |
| THB1_MOUSE  | KVT-----RNQCQECRFKCCI YVGMATD L----VLDD S-----KRL-AKRKLIE |
| THB1_RAT    | KVT-----RNQCQECRFKCCI YVGMATD L----VLDD S-----KRL-AKRKLIE |
| THB1_SHEEP  | KVT-----RNQCQECRFKCCI YVGMATD L----VLDD S-----KRL-AKRKLIE |
| THB_CHICK   | KVT-----RNQCQECRFKCCI FVGMATD L----VLDD S-----KRL-AKRKLIE |
| THBA_XENLA  | KVT-----RNQCQECRFKCCI AVGMATD L----VLDD N-----KRL-AKRKLIE |
| THB_RANCA   | KVT-----RNQCQECRFKCCI AVGMATD L----VLDD S-----KRL-AKRKLIE |
| THBB_XENLA  | KVT-----RNQCQECRFKCKT VGMATD L----VLDD S-----KRL-AKRKLIE  |
| NP_571415.1 | KVT-----RNQCQECRFKCCI AVGMATD L----VLDD S-----KRL-AKRKLIE |
| THB_PAROL   | KVT-----RNQCQECRFKCCI AVGMATD L----VLDD S-----KRL-AKRKLIE |
| NHR1_ONCVO  | KIS-----RNICQFCRFQKCLRNGMTKSL----VLNET-----ERI-AKRKMII    |
| NP_000367.1 | KDN-----RRHCQACRLKRCVDIGMMKEF----ILTDE-----EVQ-RKREMIL    |
| VDR_BOVIN   | KDN-----RRHCQACRLKRCVDIGMMKEF----ILTDE-----EVQ-RKREMIL    |
| AAK48863.1  | KDN-----RRHCQACRLKRCVDIGMMKEF----ILTDE-----EVQ-RKREMIL    |
| NP_058754.1 | KDN-----RRHCQACRLKRCVDIGMMKEF----ILTDE-----EVQ-RKREMIM    |
| VDR_MOUSE   | KDN-----RRHCQACRLKRCVDIGMMKEF----ILTDE-----EVQ-RKREMIM    |
| NP_990429.1 | KDN-----RRHCQACRLKRCVDIGMMKEF----ILTDE-----EVQ-RKREMIL    |
| VDR_COTJA   | KDN-----RRHCQACRLKRCVDIGMMKEF----ILTDE-----EVQ-RKREMIL    |
| VDR_XENLA   | KDN-----RRHCQACRLKRCVDIGMMKEF----ILTDE-----EVQ-RKRQMIN    |
| NP_035066.1 | RKT-----RRQCQACRLRKCLESGMKKEM----IMSDA-----AVE-QRRALIK    |
| NP_443212.1 | RKT-----RRQCQACRLRKCLESGMKKEM----IMSDA-----AVE-QRRALIK    |
| CAB55489.1  | RKT-----RRQCQACRLRKCLESGMKKNEM----IMSDE-----AVE-ERRALIK   |
| AAM76230.1  | KIQ-----RRHCPACRLQKCLDAGMRKDM----ILSAE-----ALA-LRRAKQA    |
| NP_005113.1 | KTQ-----RRHCPACRLQKCLDAGMRKDM----ILSAE-----ALA-LRRAKQA    |
| NP_033933.1 | KAQ-----RRHCPACRLQKCLNVGMRKDM----ILSAE-----ALA-LRRARQA    |
| NP_075230.1 | KAQ-----RRHCPACRLQKCLNVGMRKDM----ILSAE-----ALA-LRRARQA    |
| BAD00038.1  | KAQ-----RRHCPACRLQKCLDAGMKKEM----ILSAE-----ALA-QRRAKQA    |
| BAD00039.1  | KAQ-----RRHCPACRLQKCLDAGMKKEM----ILSAE-----ALV-QRRAKQA    |
| NH48_CAEEEL | MVS-----RRFCQRCRLTKCFAVSLAEKS----HRLEE-----LFVGMKKEWIM    |
| NP_524493.1 | VVT-----RRFCQKCLRKCLDIGMKSEN----IMSEE-----DKL-IKRRIE      |
| NP_741445.1 | SAS-----RKFCQACRLNKCFVGMNSEW----LNDLK-----PKSSIVSGKFK     |
| AAD16050.1  | TYM-----RRKCQECRLRKRQAGMREEC----VLSEE-----QIRLKKLKRQE     |
| NP_113815.1 | TYM-----RRKCQECRLRKRQAGMREEC----VLSEE-----QIRLKKLKRQE     |
| NRH3_HUMAN  | TYM-----RRKCQECRLRKRQAGMREEC----VLSEE-----QIRLKKLKRQE     |

NP\_033499.1 AFM-----RRKCQLCRLRKCKEAGMREQC----VLSEE-----QIRKKRIQKQQ  
 NRH2\_RAT AFM-----RRKCQLCRLRKCKEAGMREQC----VLSEE-----QIRKKKIQKQQ  
 NP\_009052.1 AFM-----RRKCQQLCRLRKCKEAGMREQC----VLSEE-----QIRKKKIRKQQ  
 ECR\_AEDAE MYM-----RRKCQECRLKCKLAVGMRPEC----VVPEN-----QCAIKRKEKKA  
 ECR\_CHITE MYM-----RRKCQECRLKCKLAVGMRPEC----VVPEN-----QCAIKRKEKKA  
 ECR\_LUCCU MYM-----RRKCQECRLKCKLAVGMRPEC----VVPEN-----QCAMKRREKKA  
 NP\_724460.1 MYM-----RRKCQECRLKCKLAVGMRPEC----VVPEN-----QCAMKRREKKA  
 ECR\_HELVI IYM-----RRKCQECRLKCKLAVGMRPEC----VVPEN-----QCAMKRKEKKA  
 ECR\_MANSE MYM-----RRKCQECRLKCKLAVGMRPEC----VVPES-----TCKNKRREKEA  
 ECR\_BOMMO MYM-----RRKCQECRLKCKLAVGMRPEC----VIQE-----PSKNKDRQR  
 NRH4\_HUMAN MYM-----RRKCQECRLRKCKEMGMLAECMYTGLLTEI-----QCKSKRLRKNV  
 NRH4\_MOUSE MYM-----RRKCQECRLRKCKREMGMMLAECMYTGLLTEI-----QCKSKRLRKNV  
 NP\_068513.1 MYM-----RRKCQDCRLRKCKEMGMLAEC-----LLTEI-----QCKSKRLRKNV  
 NP\_004950.2 KTQ-----RKRCPCFRFQKCLTVGMRLE----AVR-----ADRMGRGNK-F  
 NP\_776828.1 KTQ-----RKRCPCFRFQKCLTVGMRLE----AVR-----ADRMGRGNK-F  
 NP\_445796.1 KTQ-----RKRCPCFRFQKCLTVGMRLE----AVR-----ADRMGRGNK-F  
 STF1\_MOUSE KTQ-----RKRCPCFRFQKCLTVGMRLE----AVR-----ADRMGRGNK-F  
 AAG35648.1 KTL-----RKRCPCFRFQKCLTVGMRLE----AVR-----ADRMGRGNK-F  
 STF1\_PIG KTQ-----RKRCPCFRFQKCLTVGMRLE----AVR-----ADGMRGNK-F  
 AAK94918.1 KTQ-----RKRCPCYCRFQKCLTVGMRLE----AVR-----ADRMGRGNK-F  
 NP\_990409.1 KTQ-----RKRCPCYCRFQKCLTVGMRLE----AVR-----ADRMGRGNK-F  
 NP\_995582.1 KTQ-----RKRCPCYCRFQKCLTVGMRLE----AVR-----ADRMGRGNK-F  
 NP\_109601.1 KTQ-----RKRCPCYCRFQKCLTVGMRLE----AVR-----ADRMGRGNK-F  
 FTF1\_BOMMO KTQ-----RKRCPCYCRFQKCLTVGMRLE----AVR-----ADRMGRGNK-F  
 NP\_524143.2 KTQ-----RKRCPCYCRFQKCLTVGMRLE----AVR-----ADRMGRGNK-F  
 NH25\_CAEEL RTC-----RKRCPCYCRFQKCLTVGMRLE----AVR-----ADRMGRGNK-F  
 AAA28543.1 IST-----RKKCPACRFQKCLTVGMRLE----AIR-----EDRTRGGRST-Y  
 NP\_034394.1 RKQ-----RNRCQYCRLLKCLQMGMNK-----AIR-----EDGMPGGRNKS I  
 NR61\_HUMAN RKQ-----RNRCQYCRLLKCLQMGMNK-----AIR-----EDGMPGGRNKS I  
 AAG09282.1 KIR-----RKNCPACRLRKCQAGMVLG----GRK-----FKKFNKVRVMRT  
 PRGR\_SHEEP KIR-----RKNCPACRLRKCQAGMVLG----GRK-----FKKFNKVRVMRT  
 PRGR\_RABIT KIR-----RKNCPACRLRKCQAGMVLG----GRK-----FKKFNKVRVMRA  
 PRGR\_HUMAN KIR-----RKNCPACRLRKCQAGMVLG----GRK-----FKKFNKVRVVRA  
 NP\_032855.1 KIR-----RKNCPACRLRKCQAGMVLG----GRK-----FKKFNKVRVMRT  
 NP\_074038.1 KIR-----RKNCPACRLRKCQAGMVLG----GRK-----FKKFNKVRVMRA  
 NP\_990593.1 KIR-----RKNCPACRLRKCQAGMVLG----GRK-----FKKFNKVRVMRT  
 AAN63590.1 KIR-----RKNCPACRLRKCQAGMVLG----GRK-----FKKFNKVRVMRT  
 GCR\_SAGOE KIR-----RKNCPACRYRKCLQAGMNLE----ARK-----TKKK--IKGIQQ  
 GCR\_SAIBB KIR-----RKNCPACRYRKCLQAGMNLE----ARK-----TKKK--IKGIQQ  
 GCR\_AOTNA KIR-----RKNCPACRYRKCLQAGMNLE----ARK-----TKKK--IKGIQQ  
 GCR\_SAISC KIR-----RKNCPACRYRKCLQAGMNLE----ARK-----TKKKI- IKGIQQ  
 NP\_000167.1 KIR-----RKNCPACRYRKCLQAGMNLE----ARK-----TKKK--IKGIQQ  
 GCR\_PIG KIR-----RKNCPACRYRKCLQAGMNLE----ARK-----TKKK--IKGIQQ  
 GCR\_TUPGB KIR-----RKNCPACRYRKCLQAGMNLE----ARK-----TKKK--IKGIQQ  
 GCR\_RABIT KIR-----RKNCPACRYRKCLQAGMNLE----ARK-----TKKK--IKGIQQ  
 GCR\_RAT KIR-----RKNCPACRYRKCLQAGMNLE----ARK-----TKKK--IKGIQQ  
 NP\_032199.1 KIR-----RKNCPACRYRKCLQAGMNLE----ARK-----TKKK--IKGIQQ  
 GCR\_CAVPO KIR-----RENCPACRYRKCLQAGMNLQ----ARK-----TKKK--IKGIQQ  
 GCR\_XENLA KIR-----RKNCPACRYRKCLQAGMNLQ----ARK-----TKKK--IKGIQQ  
 GCR\_SHEEP -----  
 GCR\_ONCMY KIR-----RKNCPACRFKCLQAGMNLE----ARK-----NKKL--IRLKGQ  
 GCR\_PAROL KIR-----RKNCPACRFKCLQAGMNLE----ARK-----NKKL--IKMKVH  
 MCR\_MOUSE KIR-----RKNCPACRLQKCLQAGMNLG----ARK-----SKKLGKLGKGLHE  
 NP\_037263.1 KIR-----RKNCPACRLQKCLQAGMNLG----ARK-----SKKLGKLGKGLHE  
 MCR\_TUPGB KIR-----RKNCPACRLQKCLQAGMNLG----ARK-----SKKLGKLGKGLHE  
 MCR\_SAISC KIR-----RKNCPACRLQKCLQAGMNLG----ARR-----SKKLGKLGKGLHE  
 NP\_000892.1 KIR-----RKNCPACRLQKCLQAGMNLG----ARK-----SKKLGKLGKGLHE

|             |                                                           |
|-------------|-----------------------------------------------------------|
| MCR_XENLA   | KIR-----RKNPCACRLQKCLQAGMNLG-----ARK-----SKKLGKLGKVHE     |
| AAG37994.1  | KFR-----RKNCPSCLRLKCYEAGMTLG-----ARK-----LKKLGNLKLQEE     |
| ANDR_EULFC  | KFR-----RKNCPSCLRLKCYEAGMTLG-----ARK-----LKKLGNLKLQEE     |
| ANDR_CANFA  | KFR-----RKNCPSCLRLKCYEAGMTLG-----ARK-----LKKLGNLKLQEE     |
| AAS19691.1  | KFR-----RKNCPSCLRLKCYEAGMTLG-----ARK-----LKKLGNLKLQEE     |
| ANDR_PAPHA  | KFR-----RKNCPSCLRLKCYEAGMTLG-----ARK-----LKKLGNLKLQEE     |
| ANDR_MACFA  | KFR-----RKNCPSCLRLKCYEAGMTLG-----ARK-----LKKLGNLKLQEE     |
| ANDR_HUMAN  | KFR-----RKNCPSCLRLKCYEAGMTLG-----ARK-----LKKLGNLKLQEE     |
| ANDR_PANTR  | KFR-----RKNCPSCLRLKCYEAGMTLG-----ARK-----LKKLGNLKLQEE     |
| AAM96904.1  | KFR-----RKNCPPCRLRLKCYEAGMTLG-----ARR-----LKKLGNLKLQEE    |
| ANDR_RABIT  | KFR-----RKNCPSCLRLKCYEAGMTLG-----ARK-----LKKLGNLKLQEE     |
| NP_036634.1 | KFR-----RKNCPSCLRLKCYEAGMTLG-----ARK-----LKKLGNLKLQEE     |
| NP_038504.1 | KFR-----RKNCPSCLRLKCYEAGMTLG-----ARK-----LKKLGNLKLQEE     |
| AAP85538.1  | KFR-----RKNCPSCLRLKCYEAGMTLG-----ARK-----LKKLGNLKAQEE     |
| AAQ93376.1  | KRR-----RKSCQACRFMKCLKVGMLKE-----GVR-----LDRVGRGGRQYK     |
| NP_036065.1 | KRR-----RKSCQACRFMKCLKVGMLKE-----GVR-----LDRVGRGGRQYK     |
| ERR2_RAT    | KRR-----RKSCQACRFMKCLKVGMLKE-----GVR-----LDRVGRGGRQYK     |
| NP_004443.2 | KRR-----RKSCQACRFMKCLKVGMLKE-----GVR-----LDRVGRGGRQYK     |
| ERR2_MOUSE  | KRR-----RKSCQACRFMKCLKVGMLKE-----GVR-----LDRVGRGGRQYK     |
| ERR1_HUMAN  | KRR-----RKACQACRFTKCLRVGMLKE-----GVR-----LDRVGRGGRQYK     |
| ERR1_MOUSE  | KRR-----RKACQACRFTKCLRVGMLKE-----GVR-----LDRVGRGGRQYK     |
| AAS46251.1  | KNR-----RKSCQACRLRLKCYEVMGMMKG-----GIR-----KDRRGGRMLKHK   |
| ESR1_PIG    | KNR-----RKSCQACRLRLKCYEVMGMMKG-----GIR-----KDRRGGRMLKHK   |
| ESR1_HORSE  | KNR-----RKSCQACRLRLKCYEVMGMMKG-----GIR-----KDRRGGRMLKHK   |
| NP_031982.1 | KNR-----RKSCQACRLRLKCYEVMGMMKG-----GIR-----KDRRGGRMLKHK   |
| NP_036821.1 | KNR-----RKSCQACRLRLKCYEVMGMMKG-----GIR-----KDRRGGRMLKHK   |
| ESR1_MESAU  | KNR-----RKSCQACRLRLKCYEVMGMMKG-----GIR-----KDRRGGRMLKHK   |
| ESR1_HUMAN  | KNR-----RKSCQACRLRLKCYEVMGMMKG-----GIR-----KDRRGGRMLKHK   |
| ESR1_XENLA  | KNR-----RKSCQACRLRLKCYEVMGMMKG-----GIR-----KDRRGGRMLKHK   |
| ESR1_POEGU  | KNR-----RKSCQACRLRLKCYEVMGMMKG-----GIR-----KDRRGGRMLKHK   |
| NP_990514.1 | KNR-----RKSCQACRLRLKCYEVMGMMKG-----GIR-----KDRRGGRMLKHK   |
| ESR1_SHEEP  | KNR-----RKSCQACRLRLKCY-----GIR-----KDRRGGRMLKHK           |
| ESR1_OREAU  | KNR-----RKSCQACRLRLKCYEVMGMMKG-----GMR-----KDR--GRVLRRE   |
| ESR1_ORENI  | KNR-----RKSCQACRLRLKCYEVMGMMKG-----GMR-----KDR--GRVLRRE   |
| ESR1_ONCMY  | RNR-----RKSCQACRLRLKCYEVMGVKG-----GLR-----KDR--GGRVLRKD   |
| ESR1_SALSA  | RNR-----RKSCQACRLRLKCYEVMGVKG-----GLR-----KDR--GGRVLRKD   |
| ESR1_PAGMA  | RNR-----RKSCQACRLRLKCYEVMGMMKG-----GMR-----KDR--G--RVLRRD |
| ESR1_SPAAU  | RNR-----RKSCQACRLRLKCYEVMGMMKG-----GVR-----KDR--G--RVLRRD |
| ESR1_ORYLA  | RNR-----RKSCQACRLRLKCYEVMGMMKG-----GVR-----KDR--I--RILRRD |
| BAB16893.1  | RNR-----RKSCQACRLRLKCYEVMGMMKG-----GIR-----KDR--GGRSVRRE  |
| ESR1 ICTPU  | RNR-----RKSCQACRLRLKCYEVMGMMKG-----GFR-----KER--GGRIIKHN  |
| ERB1_CARAU  | KNR-----RKSCQACRLRLKCYEVMGMMKC-----GLR-----RDRSSYQQRGAQ   |
| ESR2_ONCMY  | KNR-----RKSCQACRLRLKCYEVMGMMKC-----GLR-----RDRGSYQQRGAQ   |
| ESR2_SPAAU  | KNR-----RKSCQACRLRHKCYNVGMTKC-----GMR-----KERGNF--RDPQ    |
| ESR3_MICUN  | KNR-----RKSCQACRLRLKCYEVMGMTKC-----GMR-----KERGNY--RSPQ   |
| ESR2_ORENI  | KNR-----RKSCQACRLRLKCYEVMGMTKC-----GIR-----KERGNY--RNSQ   |
| ERB2_CARAU  | KSR-----RKSCQACRLRLKCYEVMGMMKC-----GVR-----RERCSYRGGRHR   |
| ESR2_ANGJA  | KNR-----RKSCQACRLRLKCYEVMGMMKC-----GVR-----RERCTYRGARHR   |
| ESR2_MICUN  | KNR-----RKSCQACRLRLKCYEVMGMMKC-----GVR-----RERCSYRGARHR   |
| ESR2 ICTPU  | KNR-----RKSCQACRLRLKCYEMGMMKC-----GAR-----RERCGYRAS--R    |
| ESR2_BOVIN  | KNR-----RKSCQACRLRLKCYEVMGVKC-----GSR-----RERCGYRIVRRQ    |
| ESR2_SHEEP  | KNR-----RKSCQACRLRLKCYEVMGVKC-----GSR-----RERCGYRIVRRQ    |
| ESR2_MOUSE  | KNR-----RKSCQACRLRLKCYEVMGVKC-----GSR-----RERCGYRIVRRQ    |
| ESR2_RAT    | KNR-----RKSCQACRLRLKCYEVMGVKC-----GSR-----RERCGYRIVRRQ    |
| ESR2_CALJA  | KNR-----RKSCQACRLRLKCYEVMGVKC-----GSR-----RERCGYRIVRRQ    |
| NP_001428.1 | KNR-----RKSCQACRLRLKCYEVMGVKC-----GSR-----RERCGYRIVRRQ    |
| ESR2_PIG    | KNR-----RKSCQACRLRLKCYEVMGVKC-----GSR-----RERCGYRIVRRQ    |

|             |                                                            |
|-------------|------------------------------------------------------------|
| ESR2_COTJA  | KNR-----RKSCQACRLRKCYEVGMMKC-----GSR-----RERCGYRILRRH      |
| NP_990125.1 | KNR-----RKSCQACRLRKCYEVGMMKC-----GSR-----RERCGYRILRRH      |
| ESR2_STUVU  | KNR-----RKSCQACRLRKCYEVGMMKC-----GSR-----RERCGYRILRRH      |
| CAA42718.1  | KRR-----RNRCQFCRFQKCLAVGMVKE-----VVR-----TDSLKGRRGRLP      |
| NR41_RAT    | KRR-----RNRCQFCRFQKCLAVGMVKE-----VVR-----TDSLKGRRGRLP      |
| NP_002126.2 | KRR-----RNRCQFCRFQKCLAVGMVKE-----VVR-----TDSLKGRRGRLP      |
| NR41_CANFA  | KRR-----RNRCQFCRFQKCLAVGMVKE-----VVR-----TDSLKGRRGRLP      |
| NR42_XENLA  | KRR-----RNRCQFCRFQKCLVVGGMVKE-----VVR-----TDSLKGRRGRLP     |
| HR38_BOMMO  | KRR-----RNRCQFCRFQKCLAVGMVKE-----VVR-----TDSLKGRRGRLP      |
| HR38_DROME  | KRR-----RNRCQFCRFQKCLVVGGMVKE-----VVR-----TDSLKGRRGRLP     |
| NP_038641.1 | KRR-----RNRCQYCRFQKCLAVGMVKE-----VVR-----TDSLKGRRGRLP      |
| NR42_RAT    | KRR-----RNRCQYCRFQKCLAVGMVKE-----VVR-----TDSLKGRRGRLP      |
| NP_006177.1 | KRR-----RNRCQYCRFQKCLAVGMVKE-----VVR-----TDSLKGRRGRLP      |
| NP_008912.2 | KRR-----RNRCQYCRFQKCLVVGGMVKE-----VVR-----TDSLKGRRGRLP     |
| NP_113816.1 | KRR-----RNRCQYCRFQKCLVVGGMVKE-----VVR-----TDSLKGRRGRLP     |
| NP_056558.1 | KRR-----RNRCQYCRFQKCLVVGGMVKE-----VVR-----TDSLKGRRGRLP     |
| NP_497731.1 | KRY-----RSRCQYCRYQKCLEVGMVKE-----IVR-----HGSLSGRRGRLS      |
| 7UP2_DROME  | QHH-----RNQCQYCRLLKCKLKMGMRE-----AVQ-----RGRVPPTQPGLA      |
| NP_524325.1 | QHH-----RNQCQYCRLLKCKLKMGMRE-----AVQ-----RGRVPPTQPGLA      |
| NP_066285.1 | QHH-----RNQCQYCRLLKCKLVGMRE-----AVQ-----RGRMPPTQP---       |
| NP_989752.1 | QHH-----RNQCQYCRLLKCKLVGMRE-----AVQ-----RGRMPPTQP---       |
| NP_542956.1 | QHH-----RNQCQYCRLLKCKLVGMRE-----AVQ-----RGRMPPTQP---       |
| CAA54096.1  | QHH-----RNQCQYCRLLKCKLVGMRE-----AVQ-----RGRMPPTQP---       |
| NP_776827.1 | QHH-----RNQCQYCRLLKCKLVGMRE-----AVQ-----RGRMPPTQP---       |
| NP_005645.1 | QHH-----RNQCQYCRLLKCKLVGMRE-----AVQ-----RGRMPPTQP---       |
| NP_034281.1 | QHH-----RNQCQYCRLLKCKLVGMRE-----AVQ-----RGRMPPTQP---       |
| NP_786998.1 | QHH-----RNQCQYCRLLKCKLVGMRE-----AVQ-----RGRMPPTQP---       |
| NP_571255.1 | QHH-----RNQCQYCRLLKCKLVGMRE-----AVQ-----RGRMPPTQP---       |
| NP_571261.1 | QHH-----RNQCQYCRLLKCKLVGMRE-----AVQ-----RGRMPSNSQS---      |
| EAR2_MOUSE  | QHH-----RNQCQYCRLLKCKFRVGMRE-----AVQ-----RGRIPHALP---      |
| NP_620813.1 | QHH-----RNQCQYCRLLKCKFRVGMRE-----AVQ-----PGPIPHALP---      |
| NP_005225.2 | QHH-----RNQCQYCRLLKCKFRVGMRE-----AVQ-----RGRIPHSLP---      |
| AAH54649.1  | KRQ-----RNRCQYCRYQKCLAMGMKRE-----VVQDERQRSVQEERQR-NKER---- |
| NP_571313.1 | KRQ-----RNRCQYCRYQKCLAMGMKRE-----AVQ-----EERQK-NKER----    |
| NP_035435.1 | KRQ-----RNRCQYCRYQKCLAMGMKRE-----AVQ-----EERQR-GKDRN----   |
| NP_036937.1 | KRQ-----RNRCQYCRYQKCLAMGMKRE-----AVQ-----EERQR-GKDRN----   |
| NP_002948.1 | KRQ-----RNRCQYCRYQKCLAMGMKRE-----AVQ-----EERQR-GKDRN----   |
| RXRA_XENLA  | KRQ-----RNRCQYCRYQKCLAMGMKRE-----AVQ-----EERQR-GKERN----   |
| NP_571228.1 | KRQ-----RNRCQYCRYQKCLAMGMKRE-----AVQ-----EERQR-AKERS----   |
| RXRA_BRARE  | KRQ-----RNRCQYCRYQKCLAMGMKRE-----AVQ-----EERQR-GRERS----   |
| NP_008848.1 | KRQ-----RNRCQYCRYQKCLVGMKRE-----AVQ-----EERQR-SRERA----    |
| NP_033133.1 | KRQ-----RNRCQYCRYQKCLVGMKRE-----AVQ-----EERQR-SRERA----    |
| NP_990625.1 | KRQ-----RNRCQYCRYQKCLAMGMKRE-----AVQ-----EERQR-SRERS----   |
| RXRG_XENLA  | KRQ-----RNRCQYCRYQKCLAMGMKRE-----AVQ-----EERQR-SREKS----   |
| NP_035436.1 | KRQ-----RNRCQYCRYQKCLATGMKRE-----AVQ-----EERQR-GKDK----    |
| RXRB_RAT    | KRQ-----RNRCQYCRYQKCLATGMKRE-----AVQ-----EERQR-GKDK----    |
| S37781      | KRQ-----RNRCQYCRYQKCLATGMKRE-----AVQ-----EERQR-GKDK----    |
| USP_BOMMO   | KRQ-----RNRCQYCRYQKCLACGMKRE-----AVQ-----EERQRAARTE----    |
| USP_MANSE   | KRQ-----RNRCQYCRYQKCLACGMKRE-----AVQ-----EERQRAARGTE----   |
| USP_CHOFU   | KRQ-----RNRCQYCRYQKCLACGMKRE-----AVQ-----EERQRNARGAE----   |
| NP_476781.1 | KRQ-----RNRCQYCRYQKCLTCGMKRE-----AVQ-----EERQRGARNAA----   |
| NP_059019.1 | KHH-----RNRCQFCRLKCKLEMGMKME-----SVQ-----SERKPFVQVQ----    |
| TR4_MOUSE   | KHH-----RNRCQFCRLKCKLEMGMKME-----SVQ-----SERKPFVQVQ----    |
| TR4_HUMAN   | KHH-----RNRCQFCRLKCKLEMGMKME-----SVQ-----SERKPFVQVQ----    |
| TR2_HUMAN   | KHH-----RNRCQYCRLLQRCIAFGMKQD-----SVQ-----CERKPIEVS----    |
| HR78_DROME  | KHH-----RNRCQFCRLQKCLASGMRS-----SVQ-----HERKPIVDR----      |
| NH41_CAEEL  | KFH-----RNRCQYCRLLKCKLSMGMRS-----SVQ-----AERRPVNNS----     |

NP\_003260.1 KTH-----RNQCRACRLKKCLEVNMMNKD-----AVQHE-----RGPRTSTIRK--  
NP\_689415.1 KTH-----RNQCRACRLKKCLEVNMMNKD-----AVQHE-----RGPRTSTIRK--  
NP\_990501.1 KTH-----RNQCRACRLKKCLEVNMMNKD-----AVQHE-----RGPRTSTIRK--  
NR21\_ORYLA KTH-----RNQCRACRLKKCLEVNMMNKD-----AVQHE-----RGPRTSTIRK--  
NR21\_XENLA KTH-----RNQCRACRLKKCLEVNMMNKD-----AVQHE-----RGPRTSTIRK--  
NP\_524596.1 KTH-----RNQCRACRLRKCFEVMGNKD-----AVQHE-----RGPRNSTLRR--  
TLL\_DROVI KTH-----RNQCRACRLRKCFEVMGNKD-----AVQHE-----RGPRNSTLRR--  
NP\_502094.1 KTH-----RNQCRACRLRKCLEIGMKNKD-----AVQHE-----RGPRNSSLRR--  
NP\_038736.1 KAH-----RNQCQACRLKKCLQAGMNOQD-----AVQNE-----RQPR-SMAQV--  
NP\_055064.1 KAH-----RNQCQACRLKKCLQAGMNOQD-----AVQNE-----RQPR-STAQV--  
NP\_497074.1 KEQ-----RNACRSCRLTRCLDVGMMNPR-----AVQGD-----VEDPEWDEEAM--  
NP\_501775.1 KEH-----RNVCRSCRLKKCFEVMGNPD-----SVQNE-----RDRNAKNGGM--  
CAA54248.1 KDK-----RNQCRYCRLKKCFRAGMKKE-----AVQNE-----RDRISTRSSYE  
NP\_032287.1 KDK-----RNQCRYCRLKKCFRAGMKKE-----AVQNE-----RDRISTRSSYE  
NP\_071516.1 KDK-----RNQCRYCRLKKCFRAGMKKE-----AVQNE-----RDRISTRSSYE  
HN4A\_XENLA KDK-----RNQCRYCRLKKCFRAGMKKE-----AVQNE-----RDRISTRSSYE  
HN4B\_XENLA KDK-----RNQCRYCRLRKCFRAGMKKE-----AVQNE-----RDRISMRRSSYE  
HN4G\_HUMAN KDK-----RNQCRYCRLRKCFRAGMKKE-----AVQNE-----RDRISTRSTFD  
HN4G\_MOUSE KDK-----RNQCRYCRLRKCFRAGMKKE-----AVQNE-----RDRISTRSTYE  
S36218 KDK-----RNQCRYCRLRKCFKAGMKKE-----AVQNE-----RDRISCRRTSND  
NP\_492615.2 KNK-----RNACRACRLQKCVKAGMKSND-----AIQNE-----RDAIGKRKKTG  
NP\_491103.1 KAK-----RNACRACRLQKCVKAGMKSND-----AIQNE-----RDAIGKRKKTG  
NH35\_CAEEL KHN-----RAVCRYCFRMKCISSGMRDD-----QVQSE-----RDVIGKREKKN  
NP\_496066.2 TMA-----RKACRACRYRKCLESGMSKE-----ALQPR-----RDLIGCRRIRSR  
NH14\_CAEEL KDH-----RNACRYCFRQKCLADGMKPE-----AIQNE-----RDRIGSTKRRKR  
NP\_492612.1 KNF-----RCACRYCFRQKCVQVGMKRE-----AIQFE-----RDPVGSPTSAS  
NHR1\_CAEEL KNI-----RCACRHCYCFRQKCLLVGMDAKALQIPAIQND-----RDRIGPTKK--  
NP\_498554.1 KSI-----RCACRHCYCFRQKCLLVGMDAKALQIPAIQND-----RDRIGPTKK--  
NP\_504455.1 KGV-----RCACRYCRLQKCLAVGMDKN-----SIQND-----RDRIGYTKRTRR  
NH40\_CAEEL KSV-----RCVCRSCRLKKCFDGMGMDPK-----AIQHD-----RDKIRYTKALKK  
NP\_502117.2 KFE-----RNACRYCFRQKCLLVGMMNPD-----YVRPD-----REKSKKGTVLS  
NP\_741456.1 KFQ-----RNACRYCFRQKCLLVGMDPK-----AVRPD-----RDQTKGQKVPRI  
NP\_510423.1 KAG-----RNVCRSCRFQKCLEVGMPEPD-----AIRPD-----RDKTGRQKNPRR  
NP\_000957.1 KVT-----RNRCQYCRLOKCFEVMGMSKE-----AVRN-----DRN-KKKK-EV  
RRG2\_HUMAN KVT-----RNRCQYCRLOKCFEVMGMSKE-----AVRN-----DRN-KKKK-EV  
RRG2\_MOUSE KVT-----RNRCQYCRLOKCFEVMGMSKE-----AVRN-----DRN-KKKK-EV  
A34714 KVT-----RNRCQYCRLOKCFEVMGMSKE-----AVRN-----DRN-KKKK-EV  
RRG\_NOTVI KVT-----RNRCQYCRLOKCFEVMGMSKE-----AVRN-----DRN-KKKK-EI  
RRG\_XENLA KVT-----RNRCQYCRLOKCFEVMGMSKE-----AVRN-----DRN-KKKK-EI  
AAB59953.1 KVT-----RNRCQYCRLOKCFEVMGMSKE-----AVRN-----DRN-KKKK-DV  
NP\_571414.1 KVT-----RNRCQYCRLOKCFEVMGMSKE-----AVRN-----DRN-KKKK-DV  
AAD05222.1 KVT-----RNRCQYCRLOKCFEVMGMSKE-----SVRN-----DRN-KKKK-EV  
RRA\_MOUSE KVT-----RNRCQYCRLOKCFDVGMSKE-----SVRN-----DRN-KKKK-EA  
NP\_989867.1 KVT-----RNRCQYCRLOKCFEVMGMSKE-----SVRN-----DRN-KKKK-DV  
RRA\_XENLA KVT-----RNRCQYCRLOKCFEVMGMSKE-----SVRN-----DRN-KKKK-ES  
RRA\_NOTVI KVT-----RNRCQYCRLOKCFEVMGMSKE-----SVRN-----DRN-KKKKQEA  
RRB\_COTJA KVT-----RNRCQYCRLOKCFEVMGMSKE-----SVRN-----DRN-KKKK-EP  
S13512 KVT-----RNRCQYCRLOKCFEVMGMSKE-----SVRN-----DRN-KKKK-EP  
RRB\_HUMAN KVT-----RNRCQYCRLOKCFEVMGMSKE-----SVRN-----DRN-KKKK-ET  
RRB\_MOUSE KVT-----RNRCQYCRLOKCFEVMGMSKE-----SVRN-----DRN-KKKK-EP  
RRB\_NOTVI KVT-----RNRCQYCRLOKCFEVMGMSKE-----SVRN-----DRN-KKKK-EP  
RRA\_FUGRU KVT-----RNRCQYCRLOKCFEVMGMSKE-----SVRN-----DRN-KKKK-DE  
AAA19972.1 KKN-----RNKCQYCRFQKCLALGMSHN-----AIRF-----GRMPDGEKRKL  
NP\_006229.1 KKN-----RNKCQYCRFQKCLALGMSHN-----AIRF-----GRMPEAEKRKL  
CAA40856.1 KKN-----RNKCQYCRFHKCLSVGMSHN-----AIRF-----GRMPRSEKAKL  
NP\_037328.1 KKN-----RNKCQYCRFHKCLSVGMSHN-----AIRF-----GRMPRSEKAKL  
CAA68898.1 KKN-----RNKCQYCRFHKCLSVGMSHN-----AIRF-----GRMPRSEKAKL

PPAR\_PHACI KKN-----RNKCQYCRFQKCLSDGMSHN-----AIRF-----GRMPRSEKAKL  
PPAR\_CANFA KKN-----RNKCQYCRFHKCLSVGMSHN-----AIRF-----GRMPRSEKAKL  
PPAR\_CAVPO KKN-----RNKCQYCRFHKCLSVGMSHN-----AIRF-----GRMPRSEKAKL  
PPAR\_XENLA KKN-----RNKCQYCRFEKCLNVGMSHN-----AIRF-----GRMPRSEKAKL  
PPAS\_XENLA KKN-----RNKCQYCRFNKCLSLGMSHN-----AIRF-----GRMPSEKRRKL  
NP\_851367.1 KKS-----RNKCQYCRFQKCLAVGMSHN-----AIRF-----GRMPQAEKEKL  
PPAT\_PIG KKS-----RNKCQYCRFQKCLAVGMSHN-----AIRF-----GRMPQAEKEKL  
PPAT\_CRIGR KKS-----RNKCQYCRFQKCLAVGMSHN-----AIRF-----GRMPQAEKEKL  
PPAT\_MACMU KKS-----RNKCQYCRFQKCLAVGMSHN-----AIRF-----GRMPQAEKEKL  
CAA73382.2 KKS-----RNKCQYCRFQKCLAVGMSHN-----AIRF-----GRMPQAEKEKL  
NP\_056953.2 KKS-----RNKCQYCRFQKCLAVGMSHN-----AIRF-----GRMPQAEKEKL  
NP\_035276.1 KKS-----RNKCQYCRFQKCLAVGMSHN-----AIRF-----GRMPQAEKEKL  
PPAT\_RABIT KKS-----RNKCQYCRFQKCLAVGMSHN-----AIRF-----GRMPQAEKEKL  
PPAT\_XENLA KKS-----RNKCQYCRFQKCLAVGMSHN-----AIRF-----GRMPQAEKEKL  
CAB53540.1 RIN-----RNRCQYCRFQKCLAVGMSHN-----AIRF-----GRMPQAEKEKL  
CAB53540.1 RIN-----RNRCQYCRFQKCLAVGMSHN-----AIRF-----GRMPQAEKEKL  
NP\_665718.1 RIN-----RNRCQYCRFQKCLAVGMSHN-----AIRF-----GRMPQAEKEKL  
NP\_035714.2 RIN-----RNRCQYCRFQKCLAVGMSHN-----AIRF-----GRMPQAEKEKL  
RMN-----RNRCQYCRFQKCLAVGMSHN-----AIRF-----GRMPQAEKEKL  
NRD2\_HUMAN RMN-----RNRCQYCRFQKCLAVGMSHN-----AIRF-----GRMPQAEKEKL  
NRD2\_RAT RMN-----RNRCQYCRFQKCLAVGMSHN-----AIRF-----GRMPQAEKEKL  
E75\_CHOFU RIN-----RNRCQYCRFQKCLAVGMSHN-----AIRF-----GRMPQAEKEKL  
E75\_MANSE RIN-----RNRCQYCRFQKCLAVGMSHN-----AIRF-----GRMPQAEKEKL  
E75A\_DROME RIN-----RNRCQYCRFQKCLAVGMSHN-----AIRF-----GRMPQAEKEKL  
E75\_GALME RIN-----RNRCQYCRFQKCLAVGMSHN-----AIRF-----GRMPQAEKEKL  
E75\_METEN RIN-----RNRCQYCRFQKCLAVGMSHN-----AIRF-----GRMPQAEKEKL  
E75C\_DROME RIN-----RNRCQYCRFQKCLAVGMSHN-----AIRF-----GRMPQAEKEKL  
NP\_493284.1 RNN-----RNRCQYCRFQKCLAVGMSHN-----AIRF-----GRMPQAEKEKL  
AAH14804.1 RTS-----RNRCQYCRFQKCLAVGMSHN-----AIRF-----GRMPQAEKEKL  
ROHG\_HUMAN RTS-----RNRCQYCRFQKCLAVGMSHN-----AIRF-----GRMPQAEKEKL  
AAH58269.1 RTN-----RNRCQYCRFQKCLAVGMSHN-----AIRF-----GRMPQAEKEKL  
RORB\_RAT RTN-----RNRCQYCRFQKCLAVGMSHN-----AIRF-----GRMPQAEKEKL  
RORB\_HUMAN RTN-----RNRCQYCRFQKCLAVGMSHN-----AIRF-----GRMPQAEKEKL  
NP\_038674.1 RTS-----RNRCQYCRFQKCLAVGMSHN-----AIRF-----GRMPQAEKEKL  
NP\_599022.1 RTS-----RNRCQYCRFQKCLAVGMSHN-----AIRF-----GRMPQAEKEKL  
HR3\_GALME RVN-----RNRCQYCRFQKCLAVGMSHN-----AIRF-----GRMPQAEKEKL  
HR3\_MANSE RVN-----RNRCQYCRFQKCLAVGMSHN-----AIRF-----GRMPQAEKEKL  
NP\_788303.1 RVN-----RNRCQYCRFQKCLAVGMSHN-----AIRF-----GRMPQAEKEKL  
NP\_740887.1 RVN-----RNRCQYCRFQKCLAVGMSHN-----AIRF-----GRMPQAEKEKL  
E78A\_DROME RLN-----RNRCQYCRFQKCLAVGMSHN-----AIRF-----GRMPQAEKEKL  
NP\_509713.2 RES-----RNRCQYCRFQKCLAVGMSHN-----AIRF-----GRMPQAEKEKL  
NHR2\_CAEEI YENCAANRGVTRCQACRFQKCLAVGMSHN-----AIRF-----GRMPQAEKEKL  
NP\_494785.1 INI-----RCMCRACRYIKCIEVGMNPA-----GVQQR-----LPPS--KTLVEV  
NP\_503561.2 ANI-----RCMCRACRYIKCIEVGMNPA-----GVQQR-----RDTIGKREIKPD  
NP\_505589.1 SNI-----RCMCRACRYIKCIEVGMNPE-----CVQNR-----RENDTPKADLQF  
NP\_510659.1 KNV-----RCMCRACRYIKCIEVGMNPK-----AVQRH-----RELFASQETSSE  
NP\_741644.1 SNV-----RNMCRACRYEKCLEVGMQRS-----SVQOK-----RDQLGRRDGLPT  
NP\_504771.1 TGM-----RKLCAACRYDKCLKVGMRSE-----AVLSR-----LAKKNQNYKCSI  
NP\_503608.2 VNG-----KFNCKQYCRFQKCLAVGMSHN-----AIRF-----GRMPQAEKEKL  
NP\_507680.1 LIF-----ALKCKNCRQLQRCYEAAGMSSE-----NFQFC-----RDLIGAKGAIK

KNIR\_DROVI IHCLLQEHEQAAAAAAGKAP-----  
NP\_524187.1 IHCLLQEHEQAAAAAAG-KAPP-----  
NP\_788552.1 IHCLLQEHEQAAAAAAGKAP-----  
EGON\_DROME IHCLLQEHEQAAAAAAGKAP-----  
1411299B QNRERR----RKEEMIRSL-----  
CAA68539.1 QNRERR----RKEEMIRSL-----  
THA1\_SHEEP QNRERR----RKEEMIRSL-----

|             |             |                   |
|-------------|-------------|-------------------|
| THA_MOUSE   | QNRERR----  | RKEEMIRSL-----    |
| THA_PIG     | QNRERR----  | RKEEMIRSL-----    |
| NP_990644.1 | ENRERR----  | RKEEMIKSL-----    |
| THA_CAIMO   | ENRERR----  | RKEEMIKSL-----    |
| THA_APTPA   | ENRERR----  | RKEEMIKSL-----    |
| ERBA_AVIER  | ENRERR----  | RKEEMIKSL-----    |
| THA_PYGAD   | ENRERR----  | RKEEMIKSL-----    |
| THAB_XENLA  | ENRVRR----  | RKEEMIKTL-----    |
| THA_RANCA   | ENRERR----  | RKEEMIKTL-----    |
| THAA_XENLA  | ENRQRR----  | RKEEMIKTL-----    |
| NP_571471.1 | ENREKR----  | KKEEIVKTL-----    |
| THAB_PAROL  | ENRERR----  | KKEEIVKTL-----    |
| THA_SALSA   | ENREKR----  | KKDEIVKTL-----    |
| THAA_PAROL  | ENREKR----  | KREEMVRTL-----    |
| THA_HIPHI   | ENREKR----  | KREEMVRTL-----    |
| NP_000452.2 | ENREKR----  | RREELQKSI-----    |
| THB2_HUMAN  | ENREKR----  | RREELQKSI-----    |
| NP_033406.1 | ENREKR----  | RREELQKSI-----    |
| THB2_RAT    | ENREKR----  | RREELQKSI-----    |
| THB1_MOUSE  | ENREKR----  | RREELQKSI-----    |
| THB1_RAT    | ENREKR----  | RREELQKSI-----    |
| THB1_SHEEP  | ENREKR----  | RREELQRSM-----    |
| THB_CHICK   | ENREKR----  | RREELQKTI-----    |
| THBA_XENLA  | ENREKR----  | RKDEIQKSL-----    |
| THB_RANCA   | ENREKR----  | RKDELQKTL-----    |
| THBB_XENLA  | ENREKR----  | RKDEIQKSI-----    |
| NP_571415.1 | ENRERR----  | RREELQKTV-----    |
| THB_PAROL   | ENRERR----  | RKEELQKTV-----    |
| NHR1_ONCVO  | DNRERR----  | KLEHLRRTLKKA----- |
| NP_000367.1 | KRKEEEE---- | ALKDSLRPKLS-----  |
| VDR_BOVIN   | KRKEEEE---- | ALKDSLRPKLS-----  |
| AAK48863.1  | KRKEEEE---- | ALKDSLRPKLS-----  |
| NP_058754.1 | KRKEEEE---- | ALKDSLRPKLS-----  |
| VDR_MOUSE   | KRKEEEE---- | ALKDSLRPKLS-----  |
| NP_990429.1 | KRKEEEE---- | ALKESLKPKLS-----  |
| VDR_COTJA   | KRKEEEE---- | ALKESLKPKLS-----  |
| VDR_XENLA   | KRKSEE----  | ALKESMRPKIS-----  |
| NP_035066.1 | RKKREK----  | IEAPPPGGQG-----   |
| NP_443212.1 | RKKREK----  | IEAPPPGGQG-----   |
| CAB55489.1  | RKKSER----  | TGTQPLGVQG-----   |
| AAM76230.1  | QRRQQQ----  | TPMQLSNEQEE-----  |
| NP_005113.1 | QRRQQQ----  | TPVQLSKEQEE-----  |
| NP_033933.1 | QRRAEK----  | ASLQLNQQQKE-----  |
| NP_075230.1 | RRRAQK----  | ASLQLSQQQKE-----  |
| BAD00038.1  | QRRAQW----  | AAVQLSKGQOE-----  |
| BAD00039.1  | QRRAQW----  | APVQLSKGQOE-----  |
| NH48_CAEEL  | SEEARL----  | EKKQRVEENR-----   |
| NP_524493.1 | TNRAKR----  | RLMENGTDACD-----  |
| NP_741445.1 | RKKPDM----  | KNNLKVEVDD-----   |
| AAD16050.1  | EEQAQA----  | TSVSPRVSSP-----   |
| NP_113815.1 | EEQAQA----  | TSVSPRVSSP-----   |
| NRH3_HUMAN  | EEQAHA----  | TSLPPRASSP-----   |
| NP_033499.1 | QQQPPP----  | PSEPAASS-----     |
| NRH2_RAT    | QQQPPP----  | PTEPASGS-----     |
| NP_009052.1 | QQESQS----  | QSQSPVGP-----     |
| ECR_AEDAE   | QKEKDK----  | VQTNATVSTT-----   |
| ECR_CHITE   | QKEKDK----  | VPGIVGSNTS-----   |

|             |                            |
|-------------|----------------------------|
| ECR_LUCCU   | QKEKDK---IQTSVCATEI-----   |
| NP_724460.1 | QKEKDK---MTTSPSSQHG-----   |
| ECR_HELVI   | QREKDK---LPVSTTTVDD-----   |
| ECR_MANSE   | QREKDK---LPVSTTTVDD-----   |
| ECR_BOMMO   | QK-KDKGILLPVSTTTVEDH-----  |
| NRH4_HUMAN  | KQHADQ----TVNEDS-----      |
| NRH4_MOUSE  | KQHADQ----TVNEDD-----      |
| NP_068513.1 | KQHADQ----TVNEDSEGRD-----  |
| NP_004950.2 | GPMYKRDRALKQQKKAQIR-----   |
| NP_776828.1 | GPMYKRDRALKQQKKAQIR-----   |
| NP_445796.1 | GPMYKRDRALKQQKKAQIR-----   |
| STF1_MOUSE  | GPMYKRDRALKQQKKAQIR-----   |
| AAG35648.1  | GPMYKRDRALKQQKKAQIR-----   |
| STF1_PIG    | GPMYKRDRALKQQKKAQIR-----   |
| AAK94918.1  | GPMYKRDRALKQQKKALIR-----   |
| NP_990409.1 | GPMYKRDRALKQQKKALIR-----   |
| NP_995582.1 | GPMYKRDRALKQQKKALIR-----   |
| NP_109601.1 | GPMYKRDRALKQQKKALIR-----   |
| FTF1_BOMMO  | GPMYKRDRARKLQMMRQRQ-----   |
| NP_524143.2 | GPMYKRDRARKLQVMRQRQ-----   |
| NH25_CAEEL  | GSFYKKDRAHRMQRNAMRV-----   |
| AAA28543.1  | QCSYTL PNSMLSPLLSPDQ-----  |
| NP_034394.1 | GPVQISEEEIERIMSGQE-----    |
| NR61_HUMAN  | GPVQISEEEIERIMSGQE-----    |
| AAG09282.1  | LDAVALPQPVGIPNESQA-----    |
| PRGR_SHEEP  | LDAVALPQPVGIPNESQA-----    |
| PRGR_RABIT  | LDAVALPQPVGIPNESQR-----    |
| PRGR_HUMAN  | LDAVALPQPLGVPNESQA-----    |
| NP_032855.1 | LDGVALPQSVGLPNESQA-----    |
| NP_074038.1 | LDGVALPQSVAFPNESQT-----    |
| NP_990593.1 | LD-VALQQPAVLQDETQSL-----   |
| AAN63590.1  | LDRIATSSPMECQQALTR-----    |
| GCR_SAGOE   | ATTGVSQETSENPAKNTIVP-----  |
| GCR_SAIBB   | ATTGVSQETSENPAKNTIVP-----  |
| GCR_AOTNA   | ATTGVSQETSENPAKNTIVP-----  |
| GCR_SAISC   | ATTGVSQETSENPAKNTIV-----   |
| NP_000167.1 | ATTGVSQETSENPKNKTIVP-----  |
| GCR_PIG     | ATTGVSQETSENSANKTIVP-----  |
| GCR_TUPGB   | TTTGISQETPENSANKTIVP-----  |
| GCR_RABIT   | TSTGVSQETSENP SNRTVVP----- |
| GCR_RAT     | ATAGVSQDTSENP-NKTIVPA----- |
| NP_032199.1 | ATAGVSQDTSENA-NKTIVPA----- |
| GCR_CAVPO   | ATTGVSQNTSENP-NKTIVPA----- |
| GCR_XENLA   | STTATARESPETSMTRTLVP-----  |
| GCR_SHEEP   | -----                      |
| GCR_ONCMY   | QTTMEPNPPPP-----           |
| GCR_PAROL   | RPTGSAEPISN-----           |
| MCR_MOUSE   | EQPQQPPPPPPQSPEEGTTY-----  |
| NP_037263.1 | EQPQQPPPPPPQSPEEGT-----    |
| MCR_TUPGB   | EQPQQPPP--PQSPEEGTTY-----  |
| MCR_SAISC   | EQPQQQ-PPPPPPPPQSPE-----   |
| NP_000892.1 | EQPQQQQPPPPPPPPQSP-----    |
| MCR_XENLA   | EHPQQPLQQTPTAS-----        |
| AAG37994.1  | GEASSATSPTEEPAQKLT-----    |
| ANDR_EULFC  | GEASSATSPTEESSQKLT-----    |
| ANDR_CANFA  | GEASNVTSPTEEPTQKLT-----    |
| AAS19691.1  | GEASSTTSPTEETAQKLT-----    |

|             |                            |
|-------------|----------------------------|
| ANDR_PAPHA  | GEASSTTSPTEETAQKLT-----    |
| ANDR_MACFA  | GEASSTTSPTEETAQKLT-----    |
| ANDR_HUMAN  | GEASSTTSPTEETTQKLT-----    |
| ANDR_PANTR  | GEASSTTSPTEETTQKLT-----    |
| AAM96904.1  | GEASSTTSPTEETTQKLT-----    |
| ANDR_RABIT  | GESSSASSPTEDTTQKLT-----    |
| NP_036634.1 | GENSSAGSPTEDPSQKMT-----    |
| NP_038504.1 | GENSNAGSPTEDPSQKMT-----    |
| AAP85538.1  | LEGSPGQSEGREMPPNMS-----    |
| AAQ93376.1  | RRIDAENSPYLNLPQLVQP-----   |
| NP_036065.1 | RRIDAENSPYLNLPQLVQP-----   |
| ERR2_RAT    | RRLDSENSPYLSLQISPP-----    |
| NP_004443.2 | RRLDSESSPYLSLQISPP-----    |
| ERR2_MOUSE  | RRLDSENSPYLNLPISPP-----    |
| ERR1_HUMAN  | RRPEVDPLPFPFPFPAGP-----    |
| ERR1_MOUSE  | RRPEVDPLPFPFPFPAGP-----    |
| AAS46251.1  | RQRDDGEGRNEAVPSGDM-----    |
| ESR1_PIG    | RQRDDGEGRNEAVPPGDM-----    |
| ESR1_HORSE  | RQRDDGEGRNEAGPSGDR-----    |
| NP_031982.1 | RQRDDLEGRNEMGASGDM-----    |
| NP_036821.1 | RQRDDLEGRNEMGTSGDM-----    |
| ESR1_MESAU  | RQRDDLEGRNDMGPSGDM-----    |
| ESR1_HUMAN  | RQRDDGEGRGEVGSAGDM-----    |
| ESR1_XENLA  | RQKEEQEQKNDVDPSEIR-----    |
| ESR1_POEGU  | RQREEQDSRNGEASSTEL-----    |
| NP_990514.1 | RQREEQDSRNGEASSTEL-----    |
| ESR1_SHEEP  | -----                      |
| ESR1_OREAU  | KHGPAQR-QTSQNLPTHKASP----- |
| ESR1_ORENI  | KRRACDRDKPAKDLPHTRAS-----  |
| ESR1_ONCMY  | KRYCGPAGDREKPYGDLEH-----   |
| ESR1_SALSA  | KRYCGPAGDREKPYGDLEH-----   |
| ESR1_PAGMA  | KQRTGTSDRDKASKGLEHRT-----  |
| ESR1_SPAAU  | KRRTGTSDRDKASKGLEHRT-----  |
| ESR1_ORYLA  | KRRTGVGDGDKVVKQEHKT-----   |
| BAB16893.1  | RRRSSNEDRDKSSSDQCSR-----   |
| ESR1 ICTPU  | RRPSGLKERERGYSKAQSG-----   |
| ERB1_CARAU  | QNRLTRFSGRMRTSGPRS-----    |
| ESR2_ONCMY  | QKRLARFSGRMRTSGPRS-----    |
| ESR2_SPAAU  | MRRVTRLSSQGRTSGPSVLN-----  |
| ESR3_MICUN  | MRRMTRLTSQGRTDSSSVLT-----  |
| ESR2_ORENI  | ARRLTRLSSQGKTAEPKGIT-----  |
| ERB2_CARAU  | RN-PPIRDSSGGAIGVRGH-----   |
| ESR2_ANGJA  | RM-PHIRELAGTGGGARTQ-----   |
| ESR2_MICUN  | RGGLQPRDPTGRGL-VRVG-----   |
| ESR2 ICTPU  | RT-APMRDGSARPVGVGQSQ-----  |
| ESR2_BOVIN  | RNSDEQLHCLSKTKRNGG-----    |
| ESR2_SHEEP  | RNSDEQLHCLSKTKRNGA-----    |
| ESR2_MOUSE  | RSASEQVHCLNKAKRTSG-----    |
| ESR2_RAT    | RSSSEQVHCLSKAKRNGG-----    |
| ESR2_CALJA  | GNAEEQLHCAGKAKRSGG-----    |
| NP_001428.1 | RSADQLHCAGKAKRSGG-----     |
| ESR2_PIG    | RNSEGHLHCLSRACKNGD-----    |
| ESR2_COTJA  | RNSED---CMGKTKKYNEAAT----- |
| NP_990125.1 | RNSED---CMGKTKKYNEAAT----- |
| ESR2_STUVU  | RGAEERVHCLGRARRYSE-----    |
| CAA42718.1  | SKPKQP--PDASPTNLLTSL-----  |
| NR41_RAT    | SKPKQP--PDASPTNLLTSL-----  |

|             |                               |
|-------------|-------------------------------|
| NP_002126.2 | SKPKQP--PDASPANLLTSL-----     |
| NR41_CANFA  | SKPKQP--PDASPANLLTSL-----     |
| NR42_XENLA  | SKPKQI--AESSPVDLINSL-----     |
| HR38_BOMMO  | SKPKCP---QESPPSPPIISLI-----   |
| HR38_DROME  | SKPKSP---QESPPSPPIISLI-----   |
| NP_038641.1 | SKPKSP--QDPSPPSPPVSL-----     |
| NR42_RAT    | SKPKSP--QDPSPPSPPVSL-----     |
| NP_006177.1 | SKPKSP--QEPSPPSPPVSL-----     |
| NP_008912.2 | SKPKSPLQQEFSQPSPPS-----       |
| NP_113816.1 | SKPKSPLQQEFSQPSPPS-----       |
| NP_056558.1 | SKPKSPLQQEFSQPSPPS-----       |
| NP_497731.1 | SKTKLA--RSEDQSPPLPL-----      |
| 7UP2_DROME  | GMHGQYQIANGDPMG-----IAG---    |
| NP_524325.1 | GMHGQYQIANGDPMG-----IAG---    |
| NP_066285.1 | -THGQFALTNGDPLNCH--SYLSG---   |
| NP_989752.1 | -THGQFALTNGDPLNCH--SYLSG---   |
| NP_542956.1 | -THGQFALTNGDPLNCH--SYLSG---   |
| CAA54096.1  | -THGQFALTNGDPLNCH--SYLSG---   |
| NP_776827.1 | -SHGQFALTNGDPLNCH--SYLSG---   |
| NP_005645.1 | -NPGQYALTNGDPLNGH--CYLSG---   |
| NP_034281.1 | -NPGQYALTNGDPLNGH--CYLSG---   |
| NP_786998.1 | -NPGQYALTNGDPLNGH--CYLSG---   |
| NP_571255.1 | -NPGQYALTNGDPLNGH--CYLSG---   |
| NP_571261.1 | -SPGQYLSNGSDPYNGQ--PYLSG---   |
| EAR2_MOUSE  | ---GPAACS---PPGATGVEPFTGPPV   |
| NP_620813.1 | ---GPAACS---PPGAAGVEPFAGPPV   |
| NP_005225.2 | ---GAVAASSGSPPGSALAAVASG---   |
| AAH54649.1  | ---DGEVESSSAANEE-----         |
| NP_571313.1 | ---DGDYECSSSANEEMPVEKILE----  |
| NP_035435.1 | ---ENEVESTSSANEDMPVEKIL-----  |
| NP_036937.1 | ---ENEVESTSSANEDMPVEKIL-----  |
| NP_002948.1 | ---ENEVESTSSANEDMPVERIL-----  |
| RXRA_XENLA  | ---ENEVESSNSANEDMPVEKIL-----  |
| NP_571228.1 | ---EAFFGG--CANEDMPVEKILEA---- |
| RXRA_BRARE  | ---DNEVDSSSSFNEEMPVEKIL-----  |
| NP_008848.1 | ---ESEAECATSGHEDMPVERIL-----  |
| NP_033133.1 | ---ESEAECASSSHEDMPVERIL-----  |
| NP_990625.1 | ---ENEAESTSGGSEDMPVERIL-----  |
| RXRG_XENLA  | ---DTEAESTSSTSEEMPVERIL-----  |
| NP_035436.1 | ---DGDGDGAGGAPEEMPVDRILE----  |
| RXRB_RAT    | ---DGDGDGAGGAPEEMPVDRILE----  |
| S37781      | ---DGDGEGAGGAPEEMPVDRILE----  |
| USP_BOMMO   | ---DAHPSVSVQ---ELSIERLLEL---- |
| USP_MANSE   | ---DAHPSVSVQ---ELSIERLLEI---- |
| USP_CHOFU   | ---DAHPSVSVQVSDLSIERL-----    |
| NP_476781.1 | ---GRLSASGGGSSGPGSVGGS-----   |
| NP_059019.1 | ---REKPSNCAASTEKIYIRKDLR----- |
| TR4_MOUSE   | ---REKPSNCAASTEKIYIRKDLR----- |
| TR4_HUMAN   | ---REKPSNCAASTEKIYIRKDLR----- |
| TR2_HUMAN   | ---REKSNCAASTEKIYIRKDLR-----  |
| HR78_DROME  | ---KEGIIAAAGGSSTSGGGNGSS----- |
| NH41_CAEL   | ---SMLCNDNNQONTTPEHLSPN-----  |
| NP_003260.1 | ---QVALYFRGHKEENGAA-----      |
| NP_689415.1 | ---QVALYFRGHKEDNGAA-----      |
| NP_990501.1 | ---QVALYFRGHKEESSGA-----      |
| NR21_ORYLA  | ---QVALYFRGHKEVNGSS-----      |
| NR21_XENLA  | ---QVALYFRGHKEVNGST-----      |

|             |                            |
|-------------|----------------------------|
| NP_524596.1 | ---HMAMYKDAMMGAGEMP-----   |
| TLL_DROVI   | ---HMAMYKDAMMGAAEMP-----   |
| NP_502094.1 | ---QQMMFDHGSSPNS-----      |
| NP_038736.1 | ---HLDAMETGSDPRSEPVA-----  |
| NP_055064.1 | ---HLDSMESNTESRPESLVA----- |
| NP_497074.1 | ---PETLSISTQTDALKVK-----   |
| NP_501775.1 | ---GGPMSSPTQSSLCKELTI----- |
| CAA54248.1  | DSSL-PSINALLQAEVL-----     |
| NP_032287.1 | DSSL-PSINALLQAEVL-----     |
| NP_071516.1 | DSSL-PSINALLQAEVL-----     |
| HN4A_XENLA  | DSSL-PSINVLQAEVL-----      |
| HN4B_XENLA  | DNGS-LSINVLTQAEAM-----     |
| HN4G_HUMAN  | GSNI-PSINTLAQAEVR-----     |
| HN4G_MOUSE  | GSNI-PSINTLAQAEVR-----     |
| S36218      | DPDPGNGLSVISLVKA-----      |
| NP_492615.2 | AEKE-DLIDQLVAAETL-----     |
| NP_491103.1 | GSNG-GIVPDDPLLDLTL-----    |
| NH35_CAEEL  | MKTYCQDPTPRTSPEL-----      |
| NP_496066.2 | PSCS-TSTPTPPRPQVE-----     |
| NH14_CAEEL  | SGANSENNSDSEGTPS-----      |
| NP_492612.1 | LNGTPFKKDRSPGYEN-----      |
| NHR1_CAEEL  | ---IKMSSGSDDEQATT-----     |
| NP_498554.1 | YPIKKVEASDECSPA-----       |
| NP_504455.1 | HDDNDMEGGVHHSEHI-----      |
| NH40_CAEEL  | KREEEKRLKEMVIKED-----      |
| NP_502117.2 | KKK-SVSRSLSYRLAD-----      |
| NP_741456.1 | KKK-QIDEELLNHMMRL-----     |
| NP_510423.1 | NTEGSIKKVSVGSILG-----      |
| NP_000957.1 | KEEGSP-DSYELSPQLEELIT----- |
| RRG2_HUMAN  | KEEGSP-DSYELSPQLEELIT----- |
| RRG2_MOUSE  | KEEGSP-DSYELSPQLEELIT----- |
| A34714      | KEEGSP-DSYELSPQLEELIT----- |
| RRG_NOTVI   | KEEVVT-DSYEMPPEMEALIQ----- |
| RRG_XENLA   | KEEVVLPDSYEMPPEMEELI-----  |
| AAB59953.1  | KDEVIPPESYELSGELEELV-----  |
| NP_571414.1 | KDEVIPPESYELSGELEELV-----  |
| AAD05222.1  | PKPECS-ESYTLTPEVGELIE----- |
| RRA_MOUSE   | PKPECS-ESYTLTPEVGELIE----- |
| NP_989867.1 | PKTECS-ESYIVTPEVEELIE----- |
| RRA_XENLA   | PKPEAI-ESYILSPETQDLIE----- |
| RRA_NOTVI   | PKQECT-ESYIITPEVEDLV-----  |
| RRB_COTJA   | TKQEST-ENYEMTAELDDLTE----- |
| S13512      | TKQEST-ENYEMTAELDDLTE----- |
| RRB_HUMAN   | SKQECT-ESYEMTAELDDLTE----- |
| RRB_MOUSE   | SKQECT-ESYEMTAELDDLTE----- |
| RRB_NOTVI   | IKQECI-ESLEMTAELDDLTE----- |
| RRA_FUGRU   | KKPECI-ENYVLPDTEQMIN-----  |
| AAA19972.1  | VAGLTASEGCQHNPQLADL-----   |
| NP_006229.1 | VAGLTANEGSQYNPQVADL-----   |
| CAA40856.1  | KAEILTCEHDLKDSETADL-----   |
| NP_037328.1 | KAEILTCEHDLKDSETADL-----   |
| CAA68898.1  | KAEILTCEHDIEDSETADL-----   |
| PPAR_PHACI  | KAEILTCEHDLEDSEVADL-----   |
| PPAR_CANFA  | KAEILTCEQDPEDAETADL-----   |
| PPAR_CAVPO  | KAEVLTCDRDSEGAETADL-----   |
| PPAR_XENLA  | KAEVLMCDQDVKDSQMADL-----   |
| PPAS_XENLA  | VQAPVS-DSAAPDSPVSDLD-----  |

|             |                             |
|-------------|-----------------------------|
| NP_851367.1 | LAEISS-DIDQLNPESADLR-----   |
| PPAT_PIG    | LAEISS-DIDQLNPESADLR-----   |
| PPAT_CRIGR  | LAEISS-DIDQLNPESADLR-----   |
| PPAT_MACMU  | LAEISS-DIDQLNPESADLR-----   |
| CAA73382.2  | LAEISS-DIDQLNPESADLR-----   |
| NP_056953.2 | LAEISS-DIDQLNPESADLR-----   |
| NP_035276.1 | LAEISS-DIDQLNPESADLR-----   |
| PPAT_RABIT  | LAEISS-DIDQLNPESADLR-----   |
| PPAT_XENLA  | LAEISS-DIDQLNPESADQR-----   |
| CAB53540.1  | LAEMQSAMN-LANNQLSS-----     |
| NP_665718.1 | LAEMQNAMN-LANNQLSS-----     |
| NP_035714.2 | LIEMQSAMKTMNTQFS-----       |
| NRD2_HUMAN  | LIEMQSAMKTMNSQFS-----       |
| NRD2_RAT    | LIEMQSAMKTMSTQFG-----       |
| E75_CHOFU   | LAAMQSSSSRAHEQAA-----       |
| E75_MANSE   | LAAMQSSSTSRAHEQAA-----      |
| E75A_DROME  | LAAMQSTQNRGQORAL-----       |
| E75_GALME   | LAAMQ-SSTTRAHEQAAA-----     |
| E75_METEN   | LAAMQ-SVNAKSQERAVL-----     |
| E75C_DROME  | WRPCNRAPRIAASSDPS-----      |
| NP_493284.1 | FEEMQKTNVQSQRDQIA-----      |
| AAH14804.1  | HAEVQKQLQQQQQQEQVA-----     |
| RORG_HUMAN  | HAEVQKQLQQRQQQQQEP-----     |
| AAH58269.1  | YAEVQKHQORLQEQRQQQ-----     |
| RORB_RAT    | YAEVQKHQORLQEQRQQQ-----     |
| RORB_HUMAN  | YAEVQKHQORLQEQRQEQ-----     |
| NP_038674.1 | YAEVQKHRMQQQORDHQQ-----     |
| NP_599022.1 | YAEVQKHRMQQQORDHQQ-----     |
| HR3_GALME   | EDEVRYHRAQMRAQTDAA-----     |
| HR3_MANSE   | EDEVRYHKAQMRAQNDA-----      |
| NP_788303.1 | EDEVRFHRAQMRAQSDAA-----     |
| NP_740887.1 | EDEVRMHKELAANGLGYQ-----     |
| E78A_DROME  | GAAASSAAAGAPASLNVD-----     |
| NP_509713.2 | DKSPDSVVFVPEISTLERQEE-----  |
| NHR2_CAEEL  | VKPSVASPNFEMTSQ-----        |
| NP_494785.1 | SMDLPTVSNPSILSFPS-----      |
| NP_503561.2 | STDLMQLLGSVGDGYP-----       |
| NP_505589.1 | DTSKTEIRRP-IPNFNI-----      |
| NP_510659.1 | SSSNPRISPT--LSWPM-----      |
| NP_741644.1 | NREEP-VLDTMRRAYEK-----      |
| NP_504771.1 | VGSPDAYEPSTSTSDS-----       |
| NP_503608.2 | -AISQSLATFLGRPEFILCCEP----- |
| NP_507680.1 | LKVPKSFQTVGRPYFVLQCDP-----  |
