# Supplementary material
Source: PubMed Central journal article supplement (PMC1183107)
Supplement: nar_33_14_4455__6.pdf [file nar_33_14_4455__6.pdf]

CLUSTAL W (1.83) multiple sequence alignment

```
AAB48082.1      CAICGDRATGKHYGASSCDGCKGFFRRSVR-KNH-----MYS-CRFS-----RQCV
AAP82997.1      CAICGDRATGKHYGASSCDGCKGFFRRSVR-KNH-----MYS-CRFS-----RQCV
HN4A_HUMAN      CAICGDRATGKHYGASSCDGCKGFFRRSVR-KNH-----MYS-CRFS-----RQCV
JC6096          CAICGDRATGKHYGASSCDGCKGFFRRSVR-KNH-----MYS-CRFS-----RQCV
JC4937         CAICGDRATGKHYGASSCDGCKGFFRRSVR-KNH-----MYS-CRFS-----RQCV
JC4938         CAICGDRATGKHYGASSCDGCKGFFRRSVR-KNH-----MYS-CRFS-----RQCV
NP_000448.3    CAICGDRATGKHYGASSCDGCKGFFRRSVR-KNH-----MYS-CRFS-----RQCV
AAH39220.1     CAICGDRATGKHYGASSCDGCKGFFRRSVR-KNH-----MYS-CRFS-----RQCV
BAB03286.1     CAICGDRATGKHYGASSCDGCKGFFRRSVR-KNH-----MYS-CRFS-----RQCV
CAA54248.1     CAICGDRATGKHYGASSCDGCKGFFRRSVR-KNH-----MYS-CRFS-----RQCV
CAA61133.1     CAICGDRATGKHYGASSCDGCKGFFRRSVR-KNH-----MYS-CRFS-----RQCV
A36471         CAICGDRATGKHYGASSCDGCKGFFRRSVR-KNH-----MYS-CRFS-----RQCV
1705219A      CAICGDRATGKHYGASSCDGCKGFFRRSVR-KNH-----MYS-CRFS-----RQCV
NP_032287.1    CAICGDRATGKHYGASSCDGCKGFFRRSVR-KNH-----MYS-CRFS-----RQCV
NP_071516.1    CAICGDRATGKHYGASSCDGCKGFFRRSVR-KNH-----MYS-CRFS-----RQCV
NP_849180.1    CAICGDRATGKHYGASSCDGCKGFFRRSVR-KNH-----MYS-CRFS-----RQCV
NP_849181.1    CAICGDRATGKHYGASSCDGCKGFFRRSVR-KNH-----MYS-CRFS-----RQCV
AAH42224.1     CAICGDRATGKHYGASSCDGCKGFFRRSVR-KNH-----MYS-CRFS-----RQCV
HN4A_XENLA     CAICGDRATGKHYGASSCDGCKGFFRRSVR-KNH-----MYS-CRFS-----RQCV
AAH56550.1     CAICGDRATGKHYGASSCDGCKGFFRRSVR-KNH-----MYS-CRFN-----RQCI
NP_919349.1    CAICGDRATGKHYGASSCDGCKGFFRRSVR-KNH-----MYS-CRFN-----RQCI
AAC02906.1     CAICGDRATAKHYGASSCDGCKGFFRRSVR-KNH-----MYS-CRFS-----RQCV
HN4B_XENLA     CAICGDRATGKHYGASSCDGCKGFFRRSVR-KNH-----VYA-CRFS-----RQCI
CAA89990.2     CAICGDRATGKHYGASTCDGCKGFFRRSIR-KSH-----IYS-CRFS-----RQCV
HN4G_HUMAN     CAICGDRATGKHYGASTCDGCKGFFRRSIR-KSH-----IYS-CRFS-----RQCV
JC6095         CAICGDRATGKHYGASTCDGCKGFFRRSIR-KSH-----IYS-CRFS-----RQCV
NP_004124.3    CAICGDRATGKHYGASSCDGCKGFFRRSIR-KSH-----VYS-CRFS-----RQCV
NP_991380.1    CAICGDRATGKHYGASSCDGCKGFFRRSIR-KSH-----VYS-CRFS-----RQCV
HN4G_MOUSE     CAICGDRATGKHYGASSCDGCKGFFRRSIR-KSH-----VYS-CRFS-----RQCV
NP_038948.1    CAICGDRATGKHYGASSCDGCKGFFRRSIR-KSH-----VYS-CRFS-----RQCV
AAH54009.1     CAICGDRATGKHYGASSCDGCKGFFRRSIR-KSH-----VYS-CRFS-----RQCV
NP_991109.1    CAICADRATGKHYGASSCDGCKGFFRRSVR-KNH-----AYT-CRFS-----RQCV
AAB93762.1     CAICGDRATGKHYGASSCDGCKGFFRRSVR-KNH-----LYT-CRFS-----RNCV
AAB93763.1     CAICGDRATGKHYGASSCDGCKGFFRRSVR-KNH-----LYT-CRFS-----RNCV
NP_723413.1    CAICGDRATGKHYGASSCDGCKGFFRRSVR-KNH-----QYT-CRFA-----RNCV
S36218        CAICGDRATGKHYGASSCDGCKGFFRRSVR-KNH-----QYT-CRFA-----RNCV
NP_723414.1    CAICGDRATGKHYGASSCDGCKGFFRRSVR-KNH-----QYT-CRFA-----RNCV
NP_476887.2    CAICGDRATGKHYGASSCDGCKGFFRRSVR-KNH-----QYT-CRFA-----RNCV
AAC72723.1     CTICSDRATGKHYGAASCDGCKGFFRRTVR-KNH-----SYT-CRFS-----RQCV
AAC72724.1     CTICSDRATGKHYGAASCDGCKGFFRRTVR-KNH-----SYT-CRFS-----RQCV
AAO39177.1     CAICGDRATGKHYGAMSCDGCKGFFRRTIR-KRH-----SYV-CRFG-----EKQC
NP_491103.1    CAICGDRATGKHYGAMSCDGCKGFFRRTIR-KRH-----SYV-CRFG-----EKQC
CAE60575.1     CAICGDKATGKHYGALS CDGCKGFFRRTIR-KHH-----SYV-CRFG-----EKQC
NP_492615.2    CHICNDKSTGKHYGAI SCDGCKGFFRRSIR-KRY-----HYQ-CRFE-----QNCD
T25211        CHICNDKSTGKHYGAI SCDGCKGFFRRSIR-KRY-----HYQ-CRFE-----QNCD
CAE60269.1     CHICNDKSTGKHYGAI SCDGCKGFFRRSIR-KRY-----HYT-CRFE-----QNCD
AAG15130.1     CHICSDVATGRHYGAIACNGCKGFFRRTVR-RNY-----EYH-CRFE-----SKCE
NH35_CAEEEL    CHICSDVATGRHYGAIACNGCKGFFRRTVR-RNY-----EYH-CRFE-----SKCE
NP_508779.3    CHICSDVATGRHYGAIACNGCKGFFRRTVR-RNY-----EYH-CRFE-----SKCE
T34093        CHICSDVATGRHYGAIACNGCKGFFRRTVR-RNY-----EYH-CRFE-----SKCE
CAE68607.1     CHICSDVATGRHYGAIACNGCKGFFRRTVR-RNY-----DYH-CRFE-----SKCD
NP_496066.2    CLICGEPSTGKHYGIVACLGCKTFRRRAVV-QRQ-----DTE-CKRE-----KPCD
T20416        CLICGEPSTGKHYGIVACLGCKTFRRRAVV-QRQ-----DTE-CKRE-----KPCD
CAE56399.1     CLICGEPSTGKHYGIVACLGCKTFRRRAVV-QRQ-----DTE-CKRE-----KACD
```

NP\_492612.1 CAVCGDKSTGTHYGVI SCNGCKGFFRRTVL-RDQ-----KFT-CRFN-----KRCV  
NP\_492613.1 CAVCGDKSTGTHYGVI SCNGCKGFFRRTVL-RDQ-----KFT-CRFN-----KRCV  
NP\_871798.1 CAVCGDKSTGTHYGVI SCNGCKGFFRRTVL-RDQ-----KFT-CRFN-----KRCV  
NP\_871799.1 CAVCGDKSTGTHYGVI SCNGCKGFFRRTVL-RDQ-----KFT-CRFN-----KRCV  
AAK17977.1 CAVCGDKSTGTHYGVI SCNGCKGFFRRTVL-RDQ-----KFT-CRFN-----KRCV  
AAG15141.1 CAVCGDKSTGTHYGVI SCNGCKGFFRRTVL-RDQ-----KFT-CRFN-----KRCV  
AAG15143.1 CAVCGDKSTGTHYGVI SCNGCKGFFRRTVL-RDQ-----KFT-CRFN-----KRCV  
CAE60267.1 CAVCGDKSTGTHYGVI SCNGCKGFFRRTVL-RDQ-----KFT-CRFN-----KRCV  
AAP13776.1 CVVCGDKAIGKHYGAVACNGCKGFFRRSVW-QNL-----QYT-CRFN-----KQCN  
CAE74907.1 CVVCGDKAIGKHYGAVACNGCKGFFRRSVW-QNL-----QYT-CRFN-----KQCN  
H89591 CVVCGDKAIGKHYGAVACNGCKGFFRRSVW-QNL-----QYT-CRFN-----KQCN  
NH14 CAEEL CVVCGDKAIGKHYGAVACNGCKGFFRRSVW-QNL-----QYT-CRFN-----KQCN  
NP\_741860.1 CVVCGDKAIGKHYGAVACNGCKGFFRRSVW-QNL-----QYT-CRFN-----KQCN  
NP\_741861.1 CVVCGDKAIGKHYGAVACNGCKGFFRRSVW-QNL-----QYT-CRFN-----KQCN  
NP\_509116.2 CSVCGDRPTGYHYDVLSCNGCKTFFRRTII-NSR-----NFI-CTKG-----GNCQ  
T34118 CSVCGDRPTGYHYDVLSCNGCKTFFRRTII-NSR-----NFI-CTKG-----GNCQ  
CAE65766.1 CSVCGDRPTGYHYDVLSCNGCKTFFRRTII-NNR-----NFQ-CTKG-----GNCQ  
CAE65768.1 CAVCGDRATGYHYEVPSCNGCKTFFRRTVL-SQR-----KYE-CMRG-----GKCF  
AAD31548.2 CAVCGDTALGKHYGVTACNGCKGFFRRSIW-KNR-----TYA-CRYQ-----GKCG  
D88206 CAVCGDTALGKHYGVTACNGCKGFFRRSIW-KNR-----TYA-CRYQ-----GKCG  
AAD03691.1 CAVCGDTALGKHYGVTACNGCKGFFRRSIW-KNR-----TYA-CRYQ-----GKCG  
AAO38653.1 CAVCGDTALGKHYGVTACNGCKGFFRRSIW-KNR-----TYA-CRYQ-----GKCG  
NP\_495534.3 CAVCGDTALGKHYGVTACNGCKGFFRRSIW-KNR-----TYA-CRYQ-----GKCG  
AAO38655.1 CAVCGDTALGKHYGVTACNGCKGFFRRSIW-KNR-----TYA-CRYQ-----GKCG  
CAE67598.1 CAVCGDTALGKHYGVNACNGCKGFFRRSIW-KNR-----TYA-CRYQ-----GKCG  
AAG15158.1 CAVCGDVALGKHYGVNACNGCKGFFRRSIW-KNR-----TYA-CRHG-----GKCL  
AAG15160.1 CAVCGDVALGKHYGVNACNGCKGFFRRSIW-KNR-----TYA-CRHG-----GKCL  
NP\_497073.1 CAVCGDVALGKHYGVNACNGCKGFFRRSIW-KNR-----TYA-CRHG-----GKCL  
NP\_497074.1 CAVCGDVALGKHYGVNACNGCKGFFRRSIW-KNR-----TYA-CRHG-----GKCL  
CAE60603.1 CAVCGDQALGKHYGVNACNGCKGFFRRSIW-KNR-----TYA-CRYG-----GKCL  
AAG15162.1 CVVCGDQAFGKHYGVNACNGCKGFFRRSVW-HNR-----QYL-CRFE-----GRCA  
AAG15163.1 CVVCGDQAFGKHYGVNACNGCKGFFRRSVW-HNR-----QYL-CRFE-----GRCA  
NP\_492607.1 CVVCGDQAFGKHYGVNACNGCKGFFRRSVW-HNR-----QYL-CRFE-----GRCA  
T23558 CVVCGDQAFGKHYGVNACNGCKGFFRRSVW-HNR-----QYL-CRFE-----GRCA  
CAE60279.1 CVVCGDQAFGKHYGVNACNGCKGFFRRSVW-NNR-----QYL-CRFE-----GRCA  
NP\_501775.1 CDVCGDVAFGKHYGINACNGCKGFFRRSVW-SRR-----QYS-CRFG-----GDCP  
T21645 CDVCGDVAFGKHYGINACNGCKGFFRRSVW-SRR-----QYS-CRFG-----GDCP  
CAE59975.1 CDVCGDVAFGKHYGINACNGCKGFFRRSVW-SRR-----QYS-CRFG-----GDCP  
NP\_510201.2 CVVCGDAADGFHYGVRSCRCNAFFRRAVT-FNM-----SFT-CRRG-----GRCP  
T23520 CVVCGDAADGFHYGVRSCRCNAFFRRAVT-FNM-----SFT-CRRG-----GRCP  
AAO39173.1 CVVCGDAADGFHYGVRSCRCNAFFRRAVT-FNM-----SFT-CRRG-----GRCP  
CAE61407.1 CVVCGDAADGFHYGVRSCRCNAFFRRAVT-FNM-----SFT-CRRG-----GRCP  
AAM69090.1 CVVCSDFASGIHYSVASCNGCKTFFRRALV-NKQ-----TFT-CQFS-----GDCV  
NP\_741729.1 CVVCSDFASGIHYSVASCNGCKTFFRRALV-NKQ-----TFT-CQFS-----GDCV  
NH40 CAEEL CVVCSDFASGIHYSVASCNGCKTFFRRALV-NKQ-----TFT-CQFS-----GDCV  
CAE58853.1 CVVCSDFASGIHYSVASCNGCKTFFRRALV-NKQ-----TFT-CQFT-----GDCV  
T16793 CVVCSDFASGIHYSVASCNGCKTFFRRALV-NKQ-----TFT-CQFS-----GDCV  
AAO39201.1 CLVCQDFASGYHYGVPSCVGCKTFFRRTIM-KKQ-----KYI-CQFE-----GNCP  
AAO39202.1 CLVCQDFASGYHYGVPSCVGCKTFFRRTIM-KKQ-----KYI-CQFE-----GNCP  
AAO39203.1 CLVCQDFASGYHYGVPSCVGCKTFFRRTIM-KKQ-----KYI-CQFE-----GNCP  
AAO27833.1 CLVCQDFASGYHYGVPSCVGCKTFFRRTIM-KKQ-----KYI-CQFE-----GNCP  
NP\_504164.1 CLVCQDFASGYHYGVPSCVGCKTFFRRTIM-KKQ-----KYI-CQFE-----GNCP  
CAE58326.1 CLVCQDFAAGYHYGVPSCVGCKTFFRRTIM-KKQ-----KYI-CQFE-----GNCP  
AAO39172.1 CLVCSDI STGYHYGVPSCNGCKTFFRRTIM-KNQ-----TFS-CQFQ-----GKCP  
NP\_498554.1 CLVCSDI STGYHYGVPSCNGCKTFFRRTIM-KNQ-----TFS-CQFQ-----GKCP  
CAE70133.1 CLVCQDI STGYHYGVPSCNGCKTFFRRTIM-KNQ-----TFQ-CQFQ-----KKCP  
AAO39181.1 CLVCQDFSSGYHYGIPSCNGCKTFFRRTVM-KKQ-----KFV-CQFD-----QNCP

NP\_505936.1 CLVCQDFSSGYHYGIPSCNGCKTFFRRTVM-KKQ-----KFV-CQFD-----QNCP  
CAE75338.1 CLVCQDFSSGYHYGIPSCNGCKTFFRRTVM-KKQ-----KFV-CQFD-----QNCP  
AAO39189.1 CLVCNDLSSGYHYGVPSGCKTFFRRTIM-KKQ-----LFV-CQHE-----KNCP  
NP\_505935.2 CLVCNDLSSGYHYGVPSGCKTFFRRTIM-KKQ-----LFV-CQHE-----KNCP  
CAE75339.1 CLVCNDISSGYHYGVPSGCKTFFRRTIM-QKH-----IFV-CQHE-----KNCS  
NP\_510834.2 CAVCSDLATGYHYGVASCNGCKTFFRRTIV-SEQ-----TFI-CQYN-----GNCD  
T28881 CAVCSDLATGYHYGVASCNGCKTFFRRTIV-SEQ-----TFI-CQYN-----GNCD  
AAP46279.1 CAVCSDLATGYHYGVASCNGCKTFFRRTIV-SEQ-----TFI-CQYN-----GNCD  
AAO39167.1 CAVCSDLATGYHYGVASCNGCKTFFRRTIV-SEQ-----TFI-CQYN-----GNCD  
CAE58689.1 CAVCSDLATGYHYGVASCNGCKTFFRRTIV-SEQ-----TFI-CQYN-----GNCD  
AAO39170.1 CAVCSDLATGYHYGVASCNGCKTFFRRTIV-SEQ-----TFI-CQYN-----GNCD  
AAP46278.1 CAVCSDLATGYHYGVASCNGCKTFFRRTIV-SEQ-----TFI-CQYN-----GNCD  
NHR1\_CAEEEL CAVCSDLATGYHYGVASCNGCKTFFRRTIV-SEQ-----TFI-CQYN-----GNCD  
NP\_504455.1 CAVCDDIATGKHYSVASCNGCKTFFRRALV-NNR-----EFV-CQGN-----KDCP  
T33174 CAVCDDIATGKHYSVASCNGCKTFFRRALV-NNR-----EFV-CQGN-----KDCP  
G89050 CAVCDDIATGKHYSVASCNGCKTFFRRALV-NNR-----EFV-CQGN-----KDCP  
CAE64622.1 CAVCDDVATGKHYSVASCNGCKTFFRRALV-NNR-----EFV-CQGN-----KDCD  
NP\_504453.1 CAVCDDIATGKHYSVASCNGCKTFFRRALV-NNR-----EFV-CQGN-----KDCP  
CAE57227.1 CTVCGDVASGIHYSVAACNGCKTFFRRVVL-ENR-----TYS-CKNN-----GDCI  
NP\_510115.1 CSVCGDVASGIHYSVAACNGCKTFFRRVVL-ENR-----TYS-CKNN-----GDCI  
AAG15127.1 CAVCGDGI AKLHYGVLACYGCKGFFRRTL-T-GKY-----RYA-CRFS-----NNCI  
NP\_741456.1 CAVCGDGI AKLHYGVLACYGCKGFFRRTL-T-GKY-----RYA-CRFS-----NNCI  
AAG15128.1 CAVCGDGI AKLHYGVLACYGCKGFFRRTL-T-GKY-----RYA-CRFS-----NNCI  
CAE70940.1 CAVCGDGI AKLHYGVLACYGCKGFFRRTL-T-GKY-----RYA-CRFG-----NNCI  
AAM81108.1 CAVCGDGI AKLHYGVLACYGCKGFFRRTL-T-GKY-----RYA-CRFS-----NNCI  
CAE72428.1 CRVCGDGN AKTHYGVVTCFGCKGFFRRTL-K-RPS-----EYA-CRHN-----GNCV  
NP\_494368.1 CKVCGDGN AKTHYGVVTCFGCKGFFRRTL-K-RPS-----EYT-CRHN-----GHCV  
CAE62036.1 CAVCGDTPAKIHYGVLACFGCKGFFRRAVKDGRN-----KYV-CRFE-----KNCE  
NP\_502117.2 CAVCGDTPAKIHYGVLACFGCKGFFRRAVKDGRN-----KYV-CRFE-----KNCE  
AAG15179.1 CMVCGDRSAGKHYGVMACYGCKGFFRRTIR-SQQ-----TYT-CRFT-----QKCA  
AAR30203.1 CMVCGDRSAGKHYGVMACYGCKGFFRRTIR-SQQ-----TYT-CRFT-----QKCA  
AAO21381.1 CMVCGDRSAGKHYGVMACYGCKGFFRRTIR-SQQ-----TYT-CRFT-----QKCA  
NP\_494413.2 CMVCGDRSAGKHYGVMACYGCKGFFRRTIR-SQQ-----TYT-CRFT-----QKCA  
CAE72436.1 CMVCGDRSAGKHYGVMACYGCKGFFRRTIR-SNQ-----SYQ-CRFT-----QKCS  
CAE63197.1 CTVCCDEASGRHYGVVACFGCKGFFRRTVR-AGK-----NYI-CRYN-----KKCR  
NP\_510423.1 CSVCCDEASGRHYGVVACFGCKGFFRRTVR-AGK-----NYV-CRYS-----KKCR  
AAC24264.2 CRVCCDSNGQPHYGTICCPSCCKGFFRRVYM-SDK-----KFE-CYRG-----NMCV  
NP\_501348.1 CRVCCDSNGQPHYGTICCPSCCKGFFRRVYM-SDK-----KFE-CYRG-----NMCV  
CAE70941.1 CRVCCDSNGQPHYGTICCPSCCKGFFRRVYM-SEK-----KFE-CYRG-----NMCV  
AAG15129.1 CRVCGDSRAGRHYGTIACNGCKGFFRRSIW-EQR-----DYV-CRFG-----GKCL  
T22948 CRVCGDSRAGRHYGTIACNGCKGFFRRSIW-EQR-----DYV-CRFG-----GKCL  
NP\_741480.1 CRVCGDSRAGRHYGTIACNGCKGFFRRSIW-EQR-----DYV-CRFG-----GKCL  
CAC70099.2 CRVCGDSRAGRHYGTIACNGCKGFFRRSIW-EQR-----DYV-CRFG-----GKCL  
CAE46673.1 CRVCGDSRAGRHYGTIACNGCKGFFRRSIW-EQR-----DYV-CRFG-----GKCL  
CAE74760.1 CRVCGDSRAGRHYGTIACNGCKGFFRRSIW-EQR-----DYV-CRFG-----GKCL  
CAC70072.3 CLVCGDDKASRHYGTIVACNGCKGFFRRSVW-EKR-----TYF-CIAN-----EDCE  
NP\_501730.2 CLVCGDDKASRHYGTIVACNGCKGFFRRSVW-EKR-----TYF-CIAN-----EDCE  
CAE69003.1 CLVCGDEKAGRHYGTIVACNGCKGFFRRSVW-DHR-----TYS-CTMG-----NNCD  
NP\_501731.1 CLVCGDPHGKRHYGAMSCNGCKGFFRRSIW-EKR-----TYK-CSFN-----NECI  
T19540 CLVCGDPHGKRHYGAMSCNGCKGFFRRSIW-EKR-----TYK-CSFN-----NECI  
CAE69004.1 CLVCGDPNAKRHYGAMSCNGCKGFFRRSIW-EKR-----VYH-CAFG-----GRCI  
NP\_504213.1 CLVCGDPNIQRHYGTIVSCNGCKGFFRRSIW-EKR-----TYK-CSFH-----NQCS  
AAD05225.1 CKVCGDRSSGKHYGIYSCDGC SGFFKRSIH-RNR-----IYT-CKATG---DLKGRCP  
NP\_477140.1 CKVCGDRSSGKHYGIYSCDGC SGFFKRSIH-RNR-----IYT-CKATG---DLKGRCP  
XP\_318587.1 CKVCGDRSSGKHYGIYSCDGC SGFFKRSIH-RNR-----VYT-CKAAG---ELKGRCP  
AAF71999.1 CKVCGDFSSGKHYNIFACDGCAGFFKRSIR-RNR-----QYV-CKAK-----DEGSCI  
AAF74116.1 CKVCGDFSSGKHYNIFACDGCAGFFKRSIR-RNR-----QYV-CKAK-----DEGSCI

AAO39180.1 CRVCEDHSSGKHYSIFSCDGCAGFFKRSIR-RHR-----QYV-CKNKGS--PSEGQCK  
NP\_502094.1 CRVCEDHSSGKHYSIFSCDGCAGFFKRSIR-RHR-----QYV-CKNKGS--PSEGQCK  
CAE62015.1 CRVCQDHSSGKHYGIYACDGCAGFFKRSIR-RHR-----QYV-CKNKGN--FDEGRCI  
B47265 CKVCRDHSSGKHYGIYACDGCAGFFKRSIR-RSR-----QYV-CKSQ-----KQGLCV  
TLL\_DROVI CKVCRDHSSGKHYGIYACDGCAGFFKRSIR-RSR-----QYV-CKSQ-----KQGLCV  
NP\_524596.1 CKVCRDHSSGKHYGIYACDGCAGFFKRSIR-RSR-----QYV-CKSQ-----KQGLCV  
XP\_316782.1 CKVCRDHSSGKHYGIYACDGCAGFFKRSIR-RSR-----QYV-CKSK-----SEVPCV  
AAM61763.1 CKVCGDRSSGKHYGVYACDGC SGFFKRSIR-RNR-----TYV-CKSGS-----QGGCP  
NR21\_ORYLA CKVCGDRSSGKHYGVYACDGC SGFFKRSIR-RNR-----IYL-CKSGS-----QGGCP  
NR21\_XENLA CKVCGDRSSGKHYGVYACDGC SGFFKRSIR-RNR-----SYV-CKSGN-----QGGCP  
NP\_003260.1 CKVCGDRSSGKHYGVYACDGC SGFFKRSIR-RNR-----TYV-CKSGN-----QGGCP  
NP\_689415.1 CKVCGDRSSGKHYGVYACDGC SGFFKRSIR-RNR-----TYV-CKSGN-----QGGCP  
NP\_990501.1 CKVCGDRSSGKHYGVYACDGC SGFFKRSIR-RNR-----TYV-CKSGN-----QGGCP  
AAP79295.1 CKVCGDRSSGKHYGVYACDGC SGFFKRSIR-RNR-----QYV-CKNKG-----NGPCP  
AAL29193.1 CKVCGDRSSGKHYGIYACDGC SGFFKRSIR-RNR-----SYT-CRATNG----KGNCV  
NP\_055064.1 CRVCGDSSSGKHYGIYACNGC SGFFKRSVR-RRL-----IYR-CQVG----AGM--CP  
NP\_057430.1 CRVCGDSSSGKHYGIYACNGC SGFFKRSVR-RRL-----IYR-CQVG----AGM--CP  
NP\_038736.1 CRVCGDSSSGKHYGIYACNGC SGFFKRSVR-RRL-----IYR-CQVG----AGM--CP  
AAF15392.2 CRVCGDSSSGKHYGIYACNGC SGFFKRSVR-RRL-----IYR-CQVG----AGM--CP  
NP\_989925.1 CKVCGDTSSGKHYGIYACNGC SGFFKRSVR-RKL-----IYR-CQAG----TGL--CP  
NP\_508547.1 CAVCGDVSSGKHYGILACNGC SGFFKRSVR-RRL-----IYR-CQAG----TGN--CV  
T29238 CAVCGDVSSGKHYGILACNGC SGFFKRSVR-RRL-----IYR-CQAG----TGN--CV  
CAE68391.1 CAVCGDVSSGKHYGILACNGC SGFFKRSVR-RRL-----IYR-CQAG----TGN--CV  
NP\_611032.1 CVVCGDTSSGKHYGILACNGC SGFFKRSVR-RKL-----IYR-AGDD----WAKNGCM  
XP\_305999.1 CVVCGDTSSGKHYGILACNGC SGFFKRSVR-RKL-----IYR-----  
NP\_725457.1 CVVCGDTSSGKHYGILACNGC SGFFKRSVR-RKL-----IYR-CQAG----TGR--CV  
XP\_319010.1 CVVCGDTSSGKHYGILACNGC SGFFKRSVR-RKL-----IYR-CQAG----TGS--CT  
XP\_345117.1 CKVCGDRSSGKHYGVYACDGC SGFFKRSIR-RNR-----TYV-CKSG-----  
CAE65008.1 CEICGDKSYGRHYGVWACDGC SCFFKRSVR-KNI-----IYT-CIAG-----NWRCV  
NP\_497579.1 CEICGDKSYGRHYGVWACDGC SCFFKRSVR-KNI-----IYT-CIAG-----NWKCV  
NP\_649647.1 CAVCGDQSSGKHYGVSCDGC SCFFKRSVR-RGS-----SYA-CIAL-----VGNCV  
XP\_307951.1 CRVCSDRSSGKHYGTVCCDGC SCFFKRSIR-KRA-----VYS-CISG-----QGGCS  
CAE70300.1 CRVCGDRASGRHYGVLSCDGC RGFKRSIR-RNL-----RYT-CKEA-----KRCV  
XP\_321796.1 CKVCGDRASGKHYGVPSDGC RGFKRSIR-RNL-----EYV-CKEG-----GKCV  
CAB05521.2 CAVCGDTSNGNHYGVPTCFGC SGFFRRTVR-NKL-----VHG-CWNG-----DGNCV  
NP\_507060.1 CAVCGDTSNGNHYGVPTCFGC SGFFRRTVR-NKL-----VHG-CWNG-----DGNCV  
1411299B CVVCGDKATGYHYRCITCEGCKGFFRRTIQKNLH-----PTYCKYDS-----CC-  
CAA68539.1 CVVCGDKATGYHYRCITCEGCKGFFRRTIQKNLH-----PTYCKYDS-----CC-  
AAH35137.1 CVVCGDKATGYHYRCITCEGCKGFFRRTIQKNLH-----PTYCKYDS-----CC-  
TVRTAR CVVCGDKATGYHYRCITCEGCKGFFRRTIQKNLH-----PTYCKYDS-----CC-  
XP\_126580.1 CVVCGDKATGYHYRCITCEGCKGFFRRTIQKNLH-----PTYCKYDS-----CC-  
THA1\_SHEEP CVVCGDKATGYHYRCITCEGCKGFFRRTIQKNLH-----PTYCKYDS-----CC-  
THA\_MOUSE CVVCGDKATGYHYRCITCEGCKGFFRRTIQKNLH-----PTYCKYDS-----CC-  
THA\_PIG CVVCGDKATGYHYRCITCEGCKGFFRRTIQKNLH-----PTYCKYDS-----CC-  
S06410 CVVCGDKATGYHYRCITCEGCKGFFRRTIQKNLH-----PTYCKYDS-----CC-  
S06907 CVVCGDKATGYHYRCITCEGCKGFFRRTIQKNLH-----PTYCKYDS-----CC-  
S09178 CVVCGDKATGYHYRCITCEGCKGFFRRTIQKNLH-----PTYCKYDS-----CC-  
S14417 CVVCGDKATGYHYRCITCEGCKGFFRRTIQKNLH-----PTYCKYDS-----CC-  
S14418 CVVCGDKATGYHYRCITCEGCKGFFRRTIQKNLH-----PTYCKYDS-----CC-  
NP\_955366.1 CVVCGDKATGYHYRCITCEGCKGFFRRTIQKNLH-----PTYCKYDS-----CC-  
NP\_835161.1 CVVCGDKATGYHYRCITCEGCKGFFRRTIQKNLH-----PTYCKYDS-----CC-  
CAA31237.1 CVVCGDKATGYHYRCITCEGCKGFFRRTIQKNLH-----PTYCKYDS-----CC-  
CAA38899.1 CVVCGDKATGYHYRCITCEGCKGFFRRTIQKNLH-----PTYCKYDS-----CC-  
CAA06701.1 CVVCGDKATGYHYRCITCEGCKGFFRRTIQKNLH-----PTYCKYDS-----CC-  
CAB57886.1 CVVCGDKATGYHYRCITCEGCKGFFRRTIQKNLH-----PTYCKYDS-----CC-  
NP\_003241.2 CVVCGDKATGYHYRCITCEGCKGFFRRTIQKNLH-----PTYCKYDS-----CC-  
NP\_112396.1 CVVCGDKATGYHYRCITCECCKGFFRRTIQKNLH-----PTYCKYDS-----CC-

QRMSA1 CVVCGDKATGYHYRCITCEGCKGFFRRTIQKNLH-----PTYSCKYDS-----CC-  
A44776 CVVCGDKPTGYHYRCITCEGCKSFFRRTIQKNLH-----PTYSCTYDG-----CC-  
CAA36459.1 CVVCGDKPTGYHYRCITCEGCKSFFRRTIQKNLH-----PTYSCTYDG-----CC-  
AAA42393.1 CVVCGDKATGYHYRCITCEGCKSFFRRTIQKNLH-----PTYSCTYDG-----CC-  
TVFVVR CVVCGDKATGYHYRCITCEGCKSFFRRTIQKNLH-----PTYSCTYDG-----CC-  
AAA42397.1 CVVCGDKATGYHYRCITCEGCKSFFRRTIQKNLH-----PTYSCTYDG-----CC-  
AAA42398.1 CVVCGDKATGYHYRCITCEGCKSFFRRTIQKNLH-----PTYSCTYDG-----CC-  
ERBA\_AVIER CVVCGDKATGYHYRCITCEGCKSFFRRTIQKNLH-----PTYSCTYDG-----CC-  
CAA68260.1 CVVCGDKATGYHYRCITCEGCKSFFRRTIQKNLH-----PTYSCTYDG-----CC-  
CAA05310.1 CVVCGDKATGYHYRCITCAGCKGFFRRTIQKNLH-----PTYSCKYDG-----CC-  
THA\_PYGAD CVVCGDKATGYHYRCITCAGCKGFFRRTIQKNLH-----PTYSCKYDG-----CC-  
CAA28545.1 CVVCGDKATGYHYRCITCEGCKGFFRRTIQKNLH-----PTYSCKYDG-----CC-  
THA\_CAIMO CVVCGDKATGYHYRCITCEGCKGFFRRTIQKNLH-----PTYSCKYDG-----CC-  
CAA05339.1 CVVCGDKATGYHYRCITCEGCKGFFRRTIQKNLH-----PTYSCKYDG-----CC-  
NP\_990644.1 CVVCGDKATGYHYRCITCEGCKGFFRRTIQKNLH-----PTYSCKYDG-----CC-  
THA\_APTPA CVVCGDKATGYHYRCITCEGCKGFFRRTIQKNLH-----PTYSCKYDG-----CC-  
THAB\_XENLA CVVCSDKATGYHYRCITCEGCKGFFRRTIQKNLH-----PSYSCKYDG-----CC-  
TVXLTA CVVCSDKATGYHYRCITCEGCKGFFRRTIQKNLH-----PSYSCKYDG-----CC-  
THA\_RANCA CVVCSDKATGYHYRCITCEGCKGFFRRTIQKNLH-----PSYSCKYDG-----CC-  
THAA\_XENLA CVVCSDKATGYHYRCITCEGCKGFFRRTIQKNLH-----PSYSCKYDG-----CC-  
B36067 CVVCSDKATGYHYRCITCEGCKGFFRRTIQKNLH-----PSYSCKYDG-----CC-  
AAO47435.1 CVVCSDKATGYHYRCITCEGCKGFFRRTIQKNLH-----PSYSCKYDG-----CC-  
THAA\_PAROL CVVCGDKATGYHYRCITCEGCKGFFRRTIQKNLH-----PSYSCKYEG-----CC-  
THA\_HIPHI CVVCGDKATGYHYRCITCEGCKGFFRRTIQKNLH-----PAYSCKYEG-----CC-  
BAD11772.1 CVVCGDKATGYHYRCITCEGCKGFFRRTIQKSLH-----PSYSCKYDG-----CC-  
NP\_571471.1 CVVCGDKATGYHYRCITCEGCKGFFRRTIQKNLH-----PSYSCKYDS-----CC-  
THAB\_PAROL CVVCGDKATGYHYRCITCEGCKGFFRRTIQKNLH-----PSYSCKYDC-----CC-  
THA\_SALSA CVVCGDKATGYHYRCITCEGCKGFFRRTIQKNLH-----PAYSCKYDG-----CC-  
THB1\_MOUSE CVVCGDKATGYHYRCITCEGCKGFFRRTIQKSLH-----PSYSCKYEG-----KC-  
THB2\_RAT CVVCGDKATGYHYRCITCEGCKGFFRRTIQKSLH-----PSYSCKYEG-----KC-  
THB1\_RAT CVVCGDKATGYHYRCITCEGCKGFFRRTIQKSLH-----PSYSCKYEG-----KC-  
AAA40916.1 CVVCGDKATGYHYRCITCEGCKGFFRRTIQKSLH-----PSYSCKYEG-----KC-  
NP\_036804.1 CVVCGDKATGYHYRCITCEGCKGFFRRTIQKSLH-----PSYSCKYEG-----KC-  
NP\_033406.1 CVVCGDKATGYHYRCITCEGCKGFFRRTIQKSLH-----PSYSCKYEG-----KC-  
THB2\_HUMAN CVVCGDKATGYHYRCITCEGCKGFFRRTIQKNLH-----PSYSCKYEG-----KC-  
TVHUAR CVVCGDKATGYHYRCITCEGCKGFFRRTIQKNLH-----PSYSCKYEG-----KC-  
NP\_000452.2 CVVCGDKATGYHYRCITCEGCKGFFRRTIQKNLH-----PSYSCKYEG-----KC-  
2NLLB CVVCGDKATGYHYRCITCEGCKGFFRRTIQKNLH-----PSYSCKYEG-----KC-  
CAB42095.1 CVVCGDKATGYHYRCITCEGCKGFFRRTIQKNLH-----PSYACKYEG-----KC-  
THB1\_SHEEP CVVCGDKATGYHYRCITCEGCKGFFRRTIQKNLH-----PSYSCKYEG-----KC-  
NP\_990778.1 CVVCGDKATGYHYRCITCEGCKGFFRRTIQKNLH-----PTYSCKYEG-----KC-  
TVCHTB CVVCGDKATGYHYRCITCEGCKGFFRRTIQKNLH-----PTYSCKYEG-----KC-  
THB\_CHICK CVVCGDKATGYHYRCITCEGCKGFFRRTIQKNLH-----PTYSCKYEG-----KC-  
AAA49654.1 CVVCGDKATGYHYRCITCEGCKGFFRRTIQKNLH-----PSYSCKYEG-----KC-  
THBA\_XENLA CVVCGDKATGYHYRCITCEGCKGFFRRTIQKNLH-----PSYSCKYEG-----KC-  
AAL13127.1 CVVCGDKATGYHYRCITCEGCKGFFRRTIQKNLH-----PSYSCKYEG-----KC-  
THB\_RANCA CVVCGDKATGYHYRCITCEGCKGFFRRTIQKNLH-----PSYSCKYEG-----KC-  
D36067 CVVCGDKATGYHYRCITCEGCKGFFRRTIQKNLH-----PSYSCKYEG-----KC-  
THBB\_XENLA CVVCGDKATGYHYRCITCEGCKGFFRRTIQKNLH-----PSYSCKYEG-----KC-  
AAO47436.1 CVVCGDKATGYHYRCITCEGCKGFFRRTIQKNLH-----PTYSCKYEG-----KC-  
AAO62999.1 CVVCGDKATGYHYRCITCEGCKGFFRRTIQKNLH-----PTYSCKYEG-----KC-  
AAD38691.1 CVVCGDKATGYHYRCITCEGCKGFFRRTIQKNLN-----PTYACKYEA-----KC-  
AAL06731.1 CVVCGDKATGYHYRCITCEGCKGFFRRTIQKNLN-----PTYACKYEA-----KC-  
AAL06732.1 CVVCGDKATGYHYRCITCEGCKGFFRRTIQKNLN-----PTYACKYEA-----KC-  
AAO86517.1 CVVCGDKATGYHYRCITCEGCKGFFRRTIQKNLN-----PTYACKYEG-----KC-  
THB\_PAROL CVVCGDKATGYHYRCITCEGCKGFFRRTIQKNLN-----PTYACKYEG-----KC-  
NP\_571415.1 CVVCGDKATGYHYRCITCEGCKGFFRRTIQKNLN-----PTYACKYEG-----KC-

BAD11773.1 CVVCGDKATGYHYRCITCEGCKGFFRRTIQKNLN-----PTYACKYEG-----KC-  
S06163 CVVCGDKATGYHYRCITCEGCKGFFRRTIQKNLH-----PTYACKYDS-----CC-  
AAC42665.1 CVVCGDKATGYHYRCITCEGCKGFFRRTVQKDLQ-----KTYQCKQRG-----KC-  
BAB68358.1 CVVCGDKATGYHYRCITCEGCKGFFRRTVQKGLH-----QAYQCKQDE-----KC-  
NHR1\_ONCVO CVVCGDDATGLHYRAITCEGCKGFFRRTVQQKI-----VYKCKSIE-----RC-  
AAF68669.1 CMVCGDCAHGFIHYGVVTCGCKGFFRRTVQRNLR-----YSCHKSS-----RC-  
CAE72381.1 CKVCGDKASGLHYGVMSCEGCKGFFR--MKSRE-----TDYECRRVK-----SC-  
1401244A CFVVCQDKSSGYHYGVSAEGCKGFFRRSIQKNH-----IYT-CHRDK-----NC-  
1408258A CFVVCQDKSSGYHYGVSAEGCRGFFRRSIQKNM-----IYT-CHRDK-----NC-  
RRB\_HUMAN CFVVCQDKSSGYHYGVSAEGCKGFFRRSIQKNM-----IYT-CHRDK-----NC-  
NP\_000956.2 CFVVCQDKSSGYHYGVSAEGCKGFFRRSIQKNM-----IYT-CHRDK-----NC-  
CAA68398.1 CFVVCQDKSSGYHYGVSAEGCKGFFRRSIQKNM-----IYT-CHRDK-----NC-  
CAA30262.1 CFVVCQDKSSGYHYGVSAEGCKGFFRRSIQKNM-----IYT-CHRDK-----NC-  
AAL02361.1 CFVVCQDKSSGYHYGVSAEGCKGFFRRSIQKNM-----IYT-CHRDK-----NC-  
RRB\_MOUSE CFVVCQDKSSGYHYGVSAEGCKGFFRRSIQKNM-----IYT-CHRDK-----NC-  
NP\_035373.1 CFVVCQDKSSGYHYGVSAEGCKGFFRRSIQKNM-----IYT-CHRDK-----NC-  
CAA05769.1 CFVVCQDKSSGYHYGVSAEGCKGFFRRSIQKNM-----IYT-CHRDK-----NC-  
1504304A CFVVCQDKSSGYHYGVSAEGCKGFFRRSIQKNM-----IYT-CHRDK-----NC-  
RRB\_NOTVI CFVVCQDKSSGYHYGVSAEGCKGFFRRSIQKNM-----IYT-CHRDK-----NC-  
NP\_990657.1 CFVVCQDKSSGYHYGVSAEGCKGFFRRSIQKNM-----VYT-CHRDK-----NC-  
RRB\_COTJA CFVVCQDKSSGYHYGVSAEGCKGFFRRSIQKNM-----VYT-CHRDK-----NC-  
S13512 CFVVCQDKSSGYHYGVSAEGCKGFFRRSIQKNM-----VYT-CHRDK-----NC-  
CAA40615.1 CFVVCQDKSSGYHYGVSAEGCKGFFRRSIQKNM-----VYT-CHRDK-----NC-  
CAA40616.1 CFVVCQDKSSGYHYGVSAEGCKGFFRRSIQKNM-----VYT-CHRDK-----NC-  
A43786 CFVVCQDKSSGYHYGVSAEGCKGFFRRSIQKNM-----VYT-CHRDK-----NC-  
AAB19628.1 CFVVCQDKSSGYHYGVSAEGCKGFFRRSIQKNM-----VYT-CHRDK-----NC-  
AAA60126.1 CFVVCQDKSSGYHYGVSAEGCKGFFRRSIQKNM-----VYT-CHRDK-----NC-  
AAB00112.1 CFVVCQDKSSGYHYGVSAEGCKGFFRRSIQKNM-----VYT-CHRDK-----NC-  
NP\_000955.1 CFVVCQDKSSGYHYGVSAEGCKGFFRRSIQKNM-----VYT-CHRDK-----NC-  
AAB00113.1 CFVVCQDKSSGYHYGVSAEGCKGFFRRSIQKNM-----VYT-CHRDK-----NC-  
AAB19602.2 CFVVCQDKSSGYHYGVSAEGCKGFFRRSIQKNM-----VYT-CHRDK-----NC-  
AAB29813.1 CFVVCQDKSSGYHYGVSAEGCKGFFRRSIQKNM-----VYT-CHRDK-----NC-  
AAC33511.1 CFVVCQDKSSGYHYGVSAEGCKGFFRRSIQKNM-----VYT-CHRDK-----NC-  
AAD05222.1 CFVVCQDKSSGYHYGVSAEGCKGFFRRSIQKNM-----VYT-CHRDK-----NC-  
AAF65452.1 CFVVCQDKSSGYHYGVSAEGCKGFFRRSIQKNM-----VYT-CHRDK-----NC-  
CAA29787.1 CFVVCQDKSSGYHYGVSAEGCKGFFRRSIQKNM-----VYT-CHRDK-----NC-  
NP\_113716.1 CFVVCQDKSSGYHYGVSAEGCKGFFRRSIQKNM-----VYT-CHRDK-----NC-  
CAA05767.1 CFVVCQDKSSGYHYGVSAEGCKGFFRRSIQKNM-----VYT-CHRDK-----NC-  
CAA05768.1 CFVVCQDKSSGYHYGVSAEGCKGFFRRSIQKNM-----VYT-CHRDK-----NC-  
CAA71177.1 CFVVCQDKSSGYHYGVSAEGCKGFFRRSIQKNM-----VYT-CHRDK-----NC-  
AAL02360.1 CFVVCQDKSSGYHYGVSAEGCKGFFRRSIQKNM-----VYT-CHRDK-----NC-  
CAA40749.1 CFVVCQDKSSGYHYGVSAEGCKGFFRRSIQKNM-----VYT-CHRDK-----NC-  
RRA\_MOUSE CFVVCQDKSSGYHYGVSAEGCKGFFRRSIQKNM-----VYT-CHRDK-----NC-  
NP\_033050.1 CFVVCQDKSSGYHYGVSAEGCKGFFRRSIQKNM-----VYT-CHRDK-----NC-  
I50674 CFVVCQDKSSGYHYGVSAEGCKGFFRRSIQKNM-----VYT-CHRDK-----NC-  
NP\_989867.1 CFVVCQDKSSGYHYGVSAEGCKGFFRRSIQKNM-----VYT-CHRDK-----NC-  
CAA55132.1 CFVVCQDKSSGYHYGVSAEGCKGFFRRSIQKNM-----VYT-CHRDK-----NC-  
RRA\_NOTVI CFVVCQDKSSGYHYGVSAEGCKGFFRRSIQKNM-----VYT-CHRDK-----TC-  
S78481 CFVVCQDKSSGYHYGVSAEGCKGFFRRSIQKNM-----VYT-CHRDK-----TC-  
AAA50050.1 CFVVCQDKSSGYHYGVSAEGCKGFFRRTIQKNM-----VYT-CHREK-----SC-  
AAH49301.1 CFVVCQDKSSGYHYGVSAEGCKGFFRRSIQKNM-----VYT-CHREK-----SC-  
CAB43871.1 CFVVCQDKSSGYHYGVSAEGCKGFFRRSIQKNM-----VYT-CHREK-----NC-  
RRA\_FUGRU CFVVCQDKSSGYHYGVSAEGCKGFFRRSIQKNM-----VYT-CHREK-----NC-  
I51256 CFVVCQDKSSGYHYGVSAEGCKGFFRRSIQKNM-----VYT-CHREK-----NC-  
NP\_571481.1 CFVVCQDKSSGYHYGVSAEGCKGFFRRSIQKNM-----VYT-CHREK-----NC-  
1DSZA CFVVCQDKSSGYHYGVSAEGCKGFFRRSIQKNM-----VYT-CHRDK-----NC-  
A41977 CFVVCQDKSSGYHYGVSAEGCKGFFRRSIQKNM-----VYT-CHRDK-----NC-

A56558 CFVCQDKSSGYHYGVSAACEGCKGFFRRSIQKNM-----VYT-CHRDK-----NC-  
RRA\_XENLA CFVCQDKSSGYHYGVSAACEGCKGFFRRSIQKNM-----VYT-CHRDK-----NC-  
B56558 CFVCQDKSSGYHYGVSAACEGCKGFFRRSIQKNM-----VYT-CHRDK-----NC-  
CAB60726.1 CFVCNDKSSGYHYGVSSCEGCKGFFRRSTQKNM-----VYT-CHRDK-----NC-  
RRG2\_HUMAN CFVCNDKSSGYHYGVSSCEGCKGFFRRSIQKNM-----VYT-CHRDK-----NC-  
RRG2\_MOUSE CFVCNDKSSGYHYGVSSCEGCKGFFRRSIQKNM-----VYT-CHRDK-----NC-  
A34714 CFVCNDKSSGYHYGVSSCEGCKGFFRRSIQKNM-----VYT-CHRDK-----NC-  
NP\_035374.2 CFVCNDKSSGYHYGVSSCEGCKGFFRRSIQKNM-----VYT-CHRDK-----NC-  
AAH19098.2 CFVCNDKSSGYHYGVSSCEGCKGFFRRSIQKNM-----VYT-CHRDK-----NC-  
AAH64524.1 CFVCNDKSSGYHYGVSSCEGCKGFFRRSIQKNM-----VYT-CHRDK-----NC-  
NP\_000957.1 CFVCNDKSSGYHYGVSSCEGCKGFFRRSIQKNM-----VYT-CHRDK-----NC-  
AAH13709.1 CFVCNDKSSGYHYGVSSCEGCKGFFRRSIQKNM-----VYT-CHRDK-----NC-  
XP\_217064.2 CFVCNDKSSGYHYGVSSCEGCKGFFRRSIQKNM-----VYT-CHRDK-----NC-  
AAL02362.1 CFVCNDKSSGYHYGVSSCEGCKGFFRRSIQKNM-----VYT-CHRDK-----NC-  
CAA52153.2 CFVCSDKSSGYHYGVSSCEGCKGFFRRSIQKNM-----VYT-CHRDK-----NC-  
A38592 CFVCNDKSSGYHYGVSSCEGCKGFFRRSIQKNM-----VYT-CHRDK-----NC-  
RRG\_XENLA CFVCNDKSSGYHYGVSSCEGCKGFFRRSIQKNM-----VYT-CHRDK-----NC-  
AAB47115.1 CFVCNDKSSGYHYGVSSCEGCKGFFRRSIQKNM-----VYT-CHRDK-----NC-  
AAB47116.1 CFVCNDKSSGYHYGVSSCEGCKGFFRRSIQKNM-----VYT-CHRDK-----NC-  
RRG\_NOTVI CFVCNDKSSGYHYGVSSCEGCKGFFRRSIQKNM-----VYT-CHRDK-----NC-  
S06124 CFVCNDKSSGYHYGVSSCEGCKGFFRRSIQKNM-----VYT-CHRDK-----NC-  
CAA49562.1 CFVCNDKSSGYHYGVSSCEGCKGFFRRSIQKNM-----VYT-CHRDK-----NC-  
AAF80975.1 CFVCNDKSSGYHYGVSSCEGCKGFFRRSIQKNM-----VYT-CHRDK-----NC-  
AAF80976.1 CFVCNDKSSGYHYGVSSCEGCKGFFRRSIQKNM-----VYT-CHRDK-----NC-  
AAB59953.1 CFVCQDKSSGYHYGVSSCEGCKGFFRRSIQKNM-----VYT-CHRDK-----NC-  
NP\_571414.1 CFVCQDKSSGYHYGVSSCEGCKGFFRRSIQKNM-----VYT-CHRDK-----NC-  
AAF80974.1 CFVCNDKSSGYHYGVSSCEGCKGFFRRSIQKNM-----VYT-CHRDK-----NC-  
1HRA CFVCQDKSSGYHYGVSAACEGCKGFFRRSIQKNM-----IYT-CHRDK-----NC-  
AAM46149.1 CFVCSDKSSGYHYGVASCEGCKGFFRRSIQKNM-----QYV-CHRDK-----NC-  
BAA25569.1 CFVCGDKSSGYHYGVASCEGCKGFFRRSVQKNM-----QYT-CHRNK-----NC-  
A56856 CKICGDKSSGIHYGVITCEGCKGFFRRSQQSNA-----TYS-CPRQK-----NC-  
NP\_002934.1 CKICGDKSSGIHYGVITCEGCKGFFRRSQQSNA-----TYS-CPRQK-----NC-  
XP\_217192.2 CKICGDKSSGIHYGVITCEGCKGFFRRSQQSNA-----TYS-CPRQK-----NC-  
CAB05396.1 CKICGDKSSGIHYGVITCEGCKGFFRRSQQSNA-----TYS-CPRQK-----NC-  
BAA22970.1 CKICGDKSSGIHYGVITCEGCKGFFRRSQQSNA-----TYS-CPRQK-----NC-  
NP\_038674.1 CKICGDKSSGIHYGVITCEGCKGFFRRSQQSNA-----TYS-CPRQK-----NC-  
NP\_599022.1 CKICGDKSSGIHYGVITCEGCKGFFRRSQQSNA-----TYS-CPRQK-----NC-  
NP\_599023.1 CKICGDKSSGIHYGVITCEGCKGFFRRSQQSNA-----TYS-CPRQK-----NC-  
NP\_599024.1 CKICGDKSSGIHYGVITCEGCKGFFRRSQQSNA-----TYS-CPRQK-----NC-  
CAA69930.1 CKICGDKSSGIHYGVITCEGCKGFFRRSQQSNA-----TYS-CPRQK-----NC-  
AAH58269.1 CKICGDKSSGIHYGVITCEGCKGFFRRSQQNNA-----SYS-CPRQR-----NC-  
NP\_990424.1 CKICGDKSSGIHYGVITCEGCKGFFRRSQQNNA-----SYS-CPRQR-----NC-  
CAD13276.1 CKICGDKSSGIHYGVITCEGCKGFFRRSQQNNA-----SYS-CPRQR-----NC-  
XP\_219749.2 CKICGDKSSGIHYGVITCEGCKGFFRRSQQNNA-----SYS-CPRQR-----NC-  
I65219 CKICGDKSSGIHYGVITCEGCKGFFRRSQQNNA-----SYS-CPRQR-----NC-  
RORB\_RAT CKICGDKSSGIHYGVITCEGCKGFFRRSQQNNA-----SYS-CPRQR-----NC-  
NP\_008845.2 CKICGDKSSGIHYGVITCEGCKGFFRRSQQNNA-----SYS-CPRQR-----NC-  
RORB\_HUMAN CKICGDKSSGIHYGVITCEGCKGFFRRSQQNNA-----SYS-CPRQR-----NC-  
AAB02582.1 CKICGDKSSGIHYGVITCEGCKGFFRRSQQCNV-----AYS-CTRQQ-----NC-  
AAD46913.1 CKICGDKSSGIHYGVITCEGCKGFFRRSQQCNV-----AYS-CTRQQ-----NC-  
AAH14804.1 CKICGDKSSGIHYGVITCEGCKGFFRRSQQCNV-----AYS-CTRQQ-----NC-  
NP\_035411.1 CKICGDKSSGIHYGVITCEGCKGFFRRSQQCNV-----AYS-CTRQQ-----NC-  
CAA10661.1 CKICGDKSSGIHYGVITCEGCKGFFRRSQQCNV-----AYS-CTRQQ-----NC-  
XP\_227436.2 CKICGDKSSGIHYGVITCEGCKGFFRRSQQCNV-----AYS-CTRQQ-----NC-  
XP\_347323.1 CKICGDKSSGIHYGVITCEGCKGFFRRSQQCNV-----AYS-CTRQQ-----NC-  
CAD38900.1 CKICGDKSSGIHYGVITCEGCKGFFRRSQRCNA-----AYS-CTRQQ-----NC-  
RORG\_HUMAN CKICGDKSSGIHYGVITCEGCKGFFRRSQRCNA-----AYS-CTRQQ-----NC-

|             |                                                         |
|-------------|---------------------------------------------------------|
| NP_005051.2 | CKICGDKSSGIHYGVITCEGCKGFFRRSQRCNA-----AYS-CTRQQ-----NC- |
| AAB54059.1  | CKVCGDKSSGVHYGVITCEGCKGFFRRSQSTVV-----NYQ-CPRNK-----AC- |
| AAC47163.1  | CKVCGDKSSGVHYGVITCEGCKGFFRRSQSTVV-----NYQ-CPRNK-----AC- |
| AAF36970.1  | CKVCGDKSSGVHYGVITCEGCKGFFRRSQSSVV-----NYQ-CPRNK-----QC- |
| NP_788301.1 | CKVCGDKSSGVHYGVITCEGCKGFFRRSQSSVV-----NYQ-CPRNK-----QC- |
| NP_788302.1 | CKVCGDKSSGVHYGVITCEGCKGFFRRSQSSVV-----NYQ-CPRNK-----QC- |
| NP_788303.1 | CKVCGDKSSGVHYGVITCEGCKGFFRRSQSSVV-----NYQ-CPRNK-----QC- |
| XP_319750.1 | CKVCGDKSSGVHYGVITCEGCKGFFRRSQSSVV-----NYQ-CPRNK-----QC- |
| AAK14384.2  | CKVCGDKSSGVHYGVITCEGCKGFFRRSQSTVV-----NYQ-CPRNK-----AC- |
| HR3_GALME   | CKVCGDKSSGVHYGVITCEGCKGFFRRSQSTVV-----NYQ-CPRNK-----AC- |
| AAK62804.1  | CKVCGDKSSGVHYGVITCEGCKGFFRRSQSTVV-----NYQ-CPRNK-----AC- |
| HR3_MANSE   | CKVCGDKSSGVHYGVITCEGCKGFFRRSQSTVV-----NYQ-CPRNK-----AC- |
| BAA89260.1  | CKVCGDKSSGVHYGVITCEGCKGFFRRSQSTVV-----NYQ-CPRNK-----AC- |
| NP_740887.1 | CKVCGDKSSGVHYGVITCEGCKGFFRRSQSSIV-----NYQ-CPRQK-----NC- |
| NP_740888.1 | CKVCGDKSSGVHYGVITCEGCKGFFRRSQSSIV-----NYQ-CPRQK-----NC- |
| AAK17973.1  | CKVCGDKSSGVHYGVITCEGCKGFFRRSQSSIV-----NYQ-CPRQK-----NC- |
| I45067      | CKVCGDKSSGVHYGVITCEGCKGFFRRSQSSIV-----NYQ-CPRQK-----NC- |
| CAE74244.1  | CKVCGDKSSGVHYGVITCEGCKGFFRRSQSSIV-----NYQ-CPRQK-----NC- |
| T18848      | CKVCGDKSSGVHYGVITCEGCKGFFRRSQSSIV-----NYQ-CPRQK-----NC- |
| T30318      | CKVCGDKSSGVHYGVITCEGCKGFFRRSQSSVV-----NYQ-CPRNK-----QC- |
| A30226      | CKVCGDVASGFHYGVHACEGCKGFFRRSIQQNI-----QYKRCLKNE-----NC- |
| NP_665718.1 | CKVCGDVASGFHYGVHACEGCKGFFRRSIQQNI-----QYKRCLKNE-----NC- |
| AAH62047.1  | CKVCGDVASGFHYGVHACEGCKGFFRRSIQQNI-----QYKRCLKNE-----NC- |
| NP_068370.1 | CKVCGDVASGFHYGVHACEGCKGFFRRSIQQNI-----QYKRCLKNE-----NC- |
| NP_663409.1 | CKVCGDVASGFHYGVHACEGCKGFFRRSIQQNI-----QYKRCLKNE-----NC- |
| CAB53540.1  | CKVCGDVASGFHYGVLACEGCKGFFRRSIQQNI-----QYKRCLKNE-----NC- |
| 1HLZ        | CKVCGDVASGFHYGVLACEGCKGFFRRSIQQNI-----QYKRCLKNE-----NC- |
| 1A6YB       | CKVCGDVASGFHYGVLACEGCKGFFRRSIQQNI-----QYKRCLKNE-----NC- |
| A57057      | CKVCGDVASGFHYGVHACEGCKGFFRRSIQQNI-----QYKKCLKNE-----NC- |
| NRD2_HUMAN  | CKVCGDVASGFHYGVHACEGCKGFFRRSIQQNI-----QYKKCLKNE-----NC- |
| NP_005117.2 | CKVCGDVASGFHYGVHACEGCKGFFRRSIQQNI-----QYKKCLKNE-----NC- |
| AAC52144.1  | CKVCGDVASGFHYGVHACEGCKGFFRRSIQQNI-----QYKKCLKNE-----NC- |
| NRD2_MOUSE  | CKVCGDVASGFHYGVHACEGCKGFFRRSIQQNI-----QYKKCLKNE-----NC- |
| NP_035714.2 | CKVCGDVASGFHYGVHACEGCKGFFRRSIQQNI-----QYKKCLKNE-----NC- |
| BAC35811.1  | CKVCGDVASGFHYGVHACEGCKGFFRRSIQQNI-----QYKKCLKNE-----NC- |
| NP_990536.1 | CKVCGDVASGFHYGVHACEGCKGFFRRSIQQNI-----QYKKCLKNN-----NC- |
| AAA62508.1  | CKVCGDVASGFHYGVHACEGCKGFFRRSIQQNI-----QYKKCLKNE-----NC- |
| NRD2_RAT    | CKVCGDVASGFHYGVHACEGCKGFFRRSIQQNI-----QYKKCLKNE-----NC- |
| CAA55014.1  | CKVCGDVASGFHYGVHACEGCKGFFRRSIQQNI-----QYKKCLKNE-----NC- |
| NP_671743.1 | CKVCGDVASGFHYGVHACEGCKGFFRRSIQQNI-----QYKKCLKNE-----NC- |
| AAK76395.1  | CKVCGDVASGFHYGVHACEGCKGFFRRSIQQNI-----QYKKCLKTE-----SC- |
| AAK76396.1  | CKVCGDVASGFHYGVHACEGCKGFFRRSIQQNI-----QYKKCLKNE-----SC- |
| AAQ91256.1  | CKVCGDVASGFHYGVHACEGCKGFFRRSIQQNI-----QYKKCLKNE-----TC- |
| 1A6YA       | CKVCGDVASGFHYGVLACEGCKGFFRRSIQQNI-----QYKRCLKNE-----NC- |
| AAG01345.1  | CKVCGDVASGFHYGVHACEGCKGFFRRSIQQNI-----QYKRCLKNE-----NC- |
| AAL57047.1  | CRVCGDKASGFHYGVHSCEGCKGFFRRSIQQKI-----QYRPCTKNQ-----QC- |
| AAL57048.1  | CRVCGDKASGFHYGVHSCEGCKGFFRRSIQQKI-----QYRPCTKNQ-----QC- |
| E75_CHOFU   | CRVCGDKASGFHYGVHSCEGCKGFFRRSIQQKI-----QYRPCTKNQ-----QC- |
| AAL57049.2  | CRVCGDKASGFHYGVHSCEGCKGFFRRSIQQKI-----QYRPCTKNQ-----QC- |
| BAA89262.1  | CRVCGDKASGFHYGVHSCEGCKGFFRRSIQQKI-----QYRPCTKNQ-----QC- |
| E75_MANSE   | CRVCGDKASGFHYGVHSCEGCKGFFRRSIQQKI-----QYRPCTKNQ-----QC- |
| NP_730321.1 | CRVCGDKASGFHYGVHSCEGCKGFFRRSIQQKI-----QYRPCTKNQ-----QC- |
| NP_730322.1 | CRVCGDKASGFHYGVHSCEGCKGFFRRSIQQKI-----QYRPCTKNQ-----QC- |
| E75A_DROME  | CRVCGDKASGFHYGVHSCEGCKGFFRRSIQQKI-----QYRPCTKNQ-----QC- |
| E75_GALME   | CRVCGDKASGFHYGVHSCEGCKGFFRRSIQQKI-----QYRPCTKNQ-----QC- |
| AAC35424.1  | CRVCGDKASGFHYGVHSCEGCKGFFRRSIQQKI-----QYRPCTKNQ-----QC- |
| E75_METEN   | CRVCGDKASGFHYGVHSCEGCKGFFRRSIQQKI-----QYRPCTKNQ-----QC- |

AAS79101.1 CRVCGDKASGFHYGVHSCEGCKGFFRRSIQQKI-----QYRPCTKNQ-----QC-  
E75C\_DROME CRVCGDKASGFHYGVHSCEGCKGFFRRSIQQKI-----QYRPCTKNQ-----QC-  
AAB35575.1 CRVCGDKASGFHYGVHSCEGCKGFFRRSIQQKI-----QYRPCTKNQ-----QC-  
CAE63462.1 CQVCSDKASGFHYGVFACEGCKGFFRRSIQQKL-----TYRACTRVE-----DC-  
NP\_493284.1 CQVCSDKASGFHYGVFACEGCKGFFRRSIQQKI-----TYRACTRAE-----DC-  
CAB61000.1 CKVCGDKASGYHYGVTSCGCKGFFRRSIQRKI-----DYR-CLKQQ-----VC-  
I45066 CKVCGDKASGYHYGVTSCGCKGFFRRSIQRKI-----DYR-CLKQQ-----VC-  
AAG15187.1 CKVCGDKASGYHYGVTSCGCKGFFRRSIQRKI-----DYR-CLKQQ-----VC-  
NP\_509713.2 CKVCGDKASGYHYGVTSCGCKGFFRRSIQRKI-----DYR-CLKQQ-----VC-  
CAE70540.1 CRICGDKASGYHYGVTSCGCKGFFRRSIQRKI-----DYR-CLKQQ-----FC-  
A49070 CKVCGDKASGYHYGVTSCGCKGFFRRSIQKQI-----EYR-CLRDG-----KC-  
AAA19975.1 CKVCGDKASGYHYGVTSCGCKGFFRRSIQKQI-----EYR-CLRDG-----KC-  
AAF69494.1 CKVCGDKASGYHYGVTSCGCKGFFRRSIQKQI-----EYR-CLRDG-----KC-  
NP\_524195.2 CKVCGDKASGYHYGVTSCGCKGFFRRSIQKQI-----EYR-CLRDG-----KC-  
E78A\_DROME CKVCGDKASGYHYGVTSCGCKGFFRRSIQKQI-----EYR-CLRDG-----KC-  
CAA67384.1 CKVCGDKASGYHYGVTSCGCKGFFRRSIQKQI-----EYR-CLRDG-----KC-  
S43435 CKVCGDKASGYHYGVTSCGCKGFFRRSIQKQI-----EYR-CLRDG-----KC-  
CAA51523.1 CKVCGDKASGYHYGVTSCGCKGFFRRSIQKQI-----EYR-CLRDG-----KC-  
XP\_316596.1 CKVCGDKASGYHYGVTSCGCKGFFRRSIQKQI-----EYR-CLRDG-----KC-  
AAK54127.1 CKVCGDKSSGFHYGVTACEGCKGFFRRSIQKQM-----EYR-CLRDG-----KC-  
AAK54129.1 CKVCGDKSSGFHYGVTACEGCKGFFRRSIQKQM-----EYR-CLRDG-----KC-  
AAF06997.1 CKVCGDKSSGFHYGVTACEGCKGFFRRSIQEQM-----EYR-CLRDG-----KC-  
A45360 CRVCGDKASGFHYGVHACEGCKGFFRRTIRMKL-----EYEKCERS-----C-  
NP\_803184.1 CRVCGDKASGFHYGVHACEGCKGFFRRTIRMKL-----EYEKCERS-----C-  
NP\_006229.1 CRVCGDKASGFHYGVHACEGCKGFFRRTIRMKL-----EYEKCERS-----C-  
AAP36130.1 CRVCGDKASGFHYGVHACEGCKGFFRRTIRMKL-----EYEKCERS-----C-  
AAF73406.1 CRVCGDKASGFHYGVHACEGCKGFFRRTIRMKL-----EYEKCERI-----C-  
AAO34393.1 CRVCGDKASGFHYGVHACEGCKGFFRRTIRMKL-----EYEKCERI-----C-  
AAF81095.1 CRVCGDKASGFHYGVHACEGCKGFFRRTIRMKL-----EYEKCERI-----C-  
BAA92682.1 CRVCGDKASGFHYGVHACEGCKGFFRRTIRMKL-----EYEKCERS-----C-  
BAC78903.1 CRVCGDKASGFHYGVHACEGCKGFFRRTIRMKL-----EYEKCERS-----C-  
NP\_990059.1 CRVCGDKASGFHYGVHACEGCKGFFRRTIRMKL-----EYEKCERS-----C-  
AAA19972.1 CRVCGDKASGFHYGVHACEGCKGFFRRTIRMKL-----EYEKCDRI-----C-  
NP\_035275.1 CRVCGDKASGFHYGVHACEGCKGFFRRTIRMKL-----EYEKCDRI-----C-  
AAC65985.1 CRVCGDKASGFHYGVHACEGCKGFFRRTIRMKL-----EYEKCDRI-----C-  
NP\_037273.1 CRVCGDKASGFHYGVHACEGCKGFFRRTIRMKL-----EYEKCDRI-----C-  
CAC29088.1 CRVCGDKASGFHYGVHACEGCKGFFRRTIRMKL-----EYEKCDRI-----C-  
AAL93239.1 CRVCGDKASGFHYGVHACEGCKGFFRRTIRMKL-----EYEKCDRS-----C-  
AAP37029.1 CRVCGDKASGFHYGVHACEGCKGFFRRTIRMKL-----EYEKCDRI-----C-  
AAA03332.1 CRVCGDKASGFHYGVHACEGCKGFFRRTIRMKL-----EYEKCDRI-----C-  
AAK76392.1 CRVCGDKASGFHYGVHACEGCKGFFRRTIRMKL-----EYERCERA-----C-  
CAC95232.1 CRICGDKASGFHYGVHACEGCKGFFRRTIRMKL-----EYERCERS-----C-  
AAC39168.2 CRVCGDKASGFHYGVHACEGCKGFFRRTIRMKL-----EYEKCERI-----C-  
CAD62448.1 CKVCGDKASGFHYGVHACEGCKGFFRRTVRMKL-----EYDRCERS-----C-  
A49289 CRICGDKASGYHYGVHACEGCKGFFRRTIRLKL-----VYDKCDRS-----C-  
AAH00052.1 CRICGDKASGYHYGVHACEGCKGFFRRTIRLKL-----VYDKCDRS-----C-  
NP\_005027.2 CRICGDKASGYHYGVHACEGCKGFFRRTIRLKL-----VYDKCDRS-----C-  
CAA68898.1 CRICGDKASGYHYGVHACEGCMGFFRRTIRLKL-----VYDKCDRS-----C-  
AAF73405.1 CRICGDKASGYHYGVHACEGCKGFFRRTIRLKL-----VYDKCDRS-----C-  
CAA40856.1 CRICGDKASGYHYGVHACEGCKGFFRRTIRLKL-----VYDKCDRS-----C-  
NP\_035274.2 CRICGDKASGYHYGVHACEGCKGFFRRTIRLKL-----VYDKCDRS-----C-  
CAD88282.1 CRICGDKASGYHYGVHACEGCKGFFRRTIRLKL-----AYDKCDRS-----C-  
NP\_037328.1 CRICGDKASGYHYGVHACEGCKGFFRRTIRLKL-----AYDKCDRS-----C-  
AAF22965.1 CRICGDKASGYHYGVHACEGCKGFFRRTIRLKL-----VYDKCDRS-----C-  
AAF73404.1 CRICGDKASGYHYGVHACEGCKGFFRRTIRLKL-----VYDKCDRS-----C-  
PPAR\_PHACI CRICGDKASGYHYGVHACEGCKGFFRRTIRLKL-----AYDKCDRS-----C-  
PPAR\_CANFA CRICGDRASGYHYGVHACEGCKGFFRRTIRLKL-----AYDKCDRS-----C-

CAA06917.1 CRICGDKASGYHYGVHACEGCKGFFRRTIRLKL-----VYDKCDRS-----C-  
PPAR\_CAVPO CRICGDKASGYHYGVHACEGCKGFFRRTIRLKL-----VYDKCDRS-----C-  
AAF80479.1 CRICGDKASGYHYGVHACEGCKGFFRRTIRLKL-----IYDKCDRN-----C-  
AAH60004.1 CRVCSDKASGFHYGVHACEGCKGFFRRTIRLKL-----VYDRCERM-----C-  
PPAR\_XENLA CRVCSDKASGFHYGVHACEGCKGFFRRTIRLKL-----VYDRCERM-----C-  
CAD62447.1 CRVCSDKASGFHYGVHACEGCKGFFRRTIRLKL-----EYDKCERS-----C-  
PPAS\_XENLA CKICGDRASGFHYGVHACEGCKGFFRRTIRMRL-----QYEHCDRN-----C-  
AAA19971.1 CRVCGDKASGFHYGVHACEGCKGFFRRTIRLKL-----IYDRCDLN-----C-  
AAF80170.1 CRVCGDKASGFHYGVHACEGCKGFFRRTIRLKL-----IYDRCDLN-----C-  
AAB87481.1 CRVCGDKASGFHYGVHACEGCKGFFRRTIRLKL-----IYDRCDLN-----C-  
AAC52134.1 CRVCGDKASGFHYGVHACEGCKGFFRRTIRLKL-----IYDRCDLN-----C-  
AAN15206.1 CRVCGDKASGFHYGVHACEGCKGFFRRTIRLKL-----IYDRCDLN-----C-  
CAA62152.1 CRVCGDKASGFHYGVHACEGCKGFFRRTIRLKL-----IYDRCDLN-----C-  
AAM88773.1 CRVCGDKASGFHYGVHACEGCKGFFRRTIRLKL-----IYDRCDLN-----C-  
AAH21798.1 CRVCGDKASGFHYGVHACEGCKGFFRRTIRLKL-----IYDRCDLN-----C-  
NP\_851367.1 CRVCGDKASGFHYGVHACEGCKGFFRRTIRLKL-----IYDRCDLN-----C-  
PPAT\_PIG CRVCGDKASGFHYGVHACEGCKGFFRRTIRLKL-----IYDRCDLN-----C-  
AAO66458.1 CRVCGDKASGFHYGVHACEGCKGFFRRTIRLKL-----IYDRCDLN-----C-  
CAB61263.1 CRVCGDKASGFHYGVHACEGCKGFFRRTIRLKL-----IYDRCDLN-----C-  
CAA73032.1 CRVCGDKASGFHYGVHACEGCKGFFRRTIRLKL-----IYDRCDLN-----C-  
CAA73382.2 CRVCGDKASGFHYGVHACEGCKGFFRRTIRLKL-----IYDRCDLN-----C-  
PPAT\_CRIGR CRVCGDKASGFHYGVHACEGCKGFFRRTIRLKL-----IYDRCDLN-----C-  
PPAT\_MACMU CRVCGDKASGFHYGVHACEGCKGFFRRTIRLKL-----IYDRCDLN-----C-  
BAA23354.1 CRVCGDKASGFHYGVHACEGCKGFFRRTIRLKL-----IYDRCDLN-----C-  
BAA32540.1 CRVCGDKASGFHYGVHACEGCKGFFRRTIRLKL-----IYDRCDLN-----C-  
JE0279 CRVCGDKASGFHYGVHACEGCKGFFRRTIRLKL-----IYDRCDLN-----C-  
JE0280 CRVCGDKASGFHYGVHACEGCKGFFRRTIRLKL-----IYDRCDLN-----C-  
NP\_005028.3 CRVCGDKASGFHYGVHACEGCKGFFRRTIRLKL-----IYDRCDLN-----C-  
NP\_035276.1 CRVCGDKASGFHYGVHACEGCKGFFRRTIRLKL-----IYDRCDLN-----C-  
NP\_037256.1 CRVCGDKASGFHYGVHACEGCKGFFRRTIRLKL-----IYDRCDLN-----C-  
NP\_056953.2 CRVCGDKASGFHYGVHACEGCKGFFRRTIRLKL-----IYDRCDLN-----C-  
AAL05261.1 CRVCGDKASGFHYGVHACEGCKGFFRRTIRLKL-----IYDRCDLN-----C-  
AAL05262.1 CRVCGDKASGFHYGVHACEGCKGFFRRTIRLKL-----IYDRCDLN-----C-  
AAL05267.1 CRVCGDKASGFHYGVHACEGCKGFFRRTIRLKL-----IYDRCDLN-----C-  
PPAT\_RABIT CRVCSDKASGFHYGVHACEGCKGFFRRTIRLKL-----IYDRCDLN-----C-  
AAO19445.1 CRVCGDKASGFHYGVHACEGCKGFFRRTIRLKL-----IYDRCDLY-----C-  
AAG60685.2 CRVCGDKASGFHYGVHACEGCKGFFRRTIGLKL-----IYDRCDLN-----C-  
AAL87700.1 CRVCGDKASGFHYGVHACEGCKGFFRRTIRLKL-----IYDRCDLN-----C-  
CAB61238.1 CRVCGDKASGFHYGVHACEGCKGFFRRTIRLKL-----IYDRCDLN-----C-  
AAN75018.1 CWVCGDKASGFHYGVHACGGCKGFFRRTIRLKL-----IYDRCDLN-----C-  
AAC39169.1 CRVCGDKASGFHYGVHACEGCKGFFRRTIRLKL-----IYDRCDLN-----C-  
AAO13014.1 CRVCGDKASGFHYGVHACEGCKGFFRRTIRLKL-----IYDRCDLN-----C-  
AAA62110.1 CRVCGDKASGFHYGVHACEGCKGFFRRTIRLKL-----IYDRCDLN-----C-  
BAA18949.1 CRVCGDKASGFHYGVHACEGCKGFFRRTIRLKL-----IYDRCDLN-----C-  
AAH60474.1 CRVCGDKASGFHYGVHACEGCKGFFRRTIRLKL-----IYERCDLN-----C-  
PPAT\_XENLA CRVCGDKASGFHYGVHACEGCKGFFRRTIRLKL-----IYERCDLN-----C-  
CAC34402.1 CRVCGDKASGFHYGVHACEGCKGFFRRTIRLKL-----IYERCDLN-----C-  
CAB51396.1 CRVCGDKASGFHYGVHACEGCKGFFRRTIRLKL-----VYDHCDLH-----C-  
CAB51618.2 CRVCGDKASGFHYGVHACEGCKGFFRRTIRLKL-----VYDHCDLH-----C-  
CAD62449.1 CRVCGDKASGFHYGVHACEGCKGFFRRTIRLKL-----VYDHCDLH-----C-  
CAC02968.1 CRVCGDKASGFHYGVHACEGCKGFFRRTVRLKL-----EYDHCDLH-----C-  
CAC02969.1 CRVCGDKASGFHYGVHACEGCKGFFRRTVRLKL-----EYDHCDLH-----C-  
CAC95230.1 CRVCGDKASGFHYGVHACEGCKGFFRRTVRLKL-----VYDHCDLH-----C-  
AAP79434.1 CRVCGDKASGFHYGVHACEGCKGFFRRTIRLKL-----IYDRCDLN-----C-  
NP\_035435.1 CAICGDRSSGKHYGVYSCEGCKGFFKRTVRKDL-----TYT-CRDNK-----DC-  
NP\_036937.1 CAICGDRSSGKHYGVYSCEGCKGFFKRTVRKDL-----TYT-CRDNK-----DC-  
AAB36777.1 CAICGDRSSGKHYGVYSCEGCKGFFKRTVRKDL-----TYT-CRDNK-----DC-

AAC95154.1 CAICGDRSSGKHYGVYSCEGCKGFFKRTVRKDL-----TYT-CRDNK-----DC-  
NP\_002948.1 CAICGDRSSGKHYGVYSCEGCKGFFKRTVRKDL-----TYT-CRDNK-----DC-  
AAH63827.1 CAICGDRSSGKHYGVYSCEGCKGFFKRTVRKDL-----TYT-CRDNK-----DC-  
AAG02188.1 CAICGDRSSGKHYGVYSCEGCKGFFKRTVRKDL-----TYT-CRDNK-----DC-  
C41977 CAICGDRSSGKHYGVYSCEGCKGFFKRTVRKDL-----TYT-CRDSK-----DC-  
RXRA\_XENLA CAICGDRSSGKHYGVYSCEGCKGFFKRTVRKDL-----TYT-CRDSK-----DC-  
NP\_571292.2 CAICGDRSSGKHYGVYSCEGCKGFFKRTVRKDL-----TYT-CRDNK-----DC-  
RXRA\_BRARE CAICGDRSSGKHYGVYSCEGCKGFFKRTVRKDL-----TYT-CRDNK-----DC-  
1DSZB CAICGDRSSGKHYGVYSCEGCKGFFKRTVRKDL-----TYT-CRDNK-----DC-  
2120366D CAICGDRSSGKHYGVYSCEGCKGFFKRTVRKDL-----TYT-CRDNK-----DC-  
NP\_571228.1 CAICGDRSSGKHYGVYSCEGCKGFFKRTVRKDL-----TYT-CRDNK-----DC-  
1RXR CAICGDRSSGKHYGVYSCEGCKGFFKRTVRKDL-----TYT-CRDNK-----DC-  
NP\_033133.1 CAICGDRSSGKHYGVYSCEGCKGFFKRTVRKDL-----IYT-CRDNK-----DC-  
S26670 CAICGDRSSGKHYGVYSCEGCKGFFKRTVRKDL-----IYT-CRDNK-----DC-  
AAB27245.1 CAICGDRSSGKHYGVYSCEGCKGFFKRTVRKDL-----IYT-CRDNK-----DC-  
CAA11109.1 CAICGDRSSGKHYGVYSCEGCKGFFKRTVRKDL-----IYT-CRDNK-----DC-  
XP\_341152.1 CAICGDRSSGKHYGVYSCEGCKGFFKRTVRKDL-----IYT-CRDNK-----DC-  
NP\_008848.1 CAICGDRSSGKHYGVYSCEGCKGFFKRTVRKDL-----IYT-CRDNK-----DC-  
NP\_990625.1 CAICGDRSSGKHYGVYSCEGCKGFFKRTVRKDL-----IYT-CRDNK-----DC-  
RXRG\_XENLA CAICGDRSSGKHYGVYSCEGCKGFFKRTVRKDL-----VYT-CRDSK-----DC-  
CAD45002.1 CVICGDRSSGKHYGVYSCEGCKGFFKRTVRKDL-----SYT-CRDNK-----EC-  
NP\_571313.1 CAICGDRSSGKHYGVYSCEGCKGFFKRTVRKDL-----SYT-CRDNK-----EC-  
BAB83838.1 CSICGDRSSGKHYGVYSCEGCKGFFKRTVRKDL-----TYT-CRDNK-----DC-  
CAA60792.1 CAICGDRSSGKHYGVYSCEGCKGFFKRTVRKDL-----TYT-CRDSK-----DC-  
S47633 CAICGDRSSGKHYGVHSCGCKGFFKRTVRKDL-----TYT-CRDSK-----DC-  
1BY4 CAICGDRSSGKHYGVYSCEGCKGFFKRTVRKDL-----TYT-CRDNK-----DC-  
RXRB\_RAT CAICGDRSSGKHYGVYSCEGCKGFFKRTVRKDL-----TYS-CRDNK-----DC-  
XP\_342096.1 CAICGDRSSGKHYGVYSCEGCKGFFKRTVRKDL-----TYS-CRDNK-----DC-  
S26669 CAICGDRSSGKHYGVYSCEGCKGFFKRTVRKDL-----TYS-CRDNK-----DC-  
NP\_035436.1 CAICGDRSSGKHYGVYSCEGCKGFFKRTVRKDL-----TYS-CRDNK-----DC-  
CAE83933.1 CAICGDRSSGKHYGVYSCEGCKGFFKRTVRKDL-----TYS-CRDNK-----DC-  
D41727 CAICGDRSSGKHYGVYSCEGCKGFFKRTVRKDL-----TYS-CRDNK-----DC-  
AAH19432.1 CAICGDRSSGKHYGVYSCEGCKGFFKRTVRKDL-----TYS-CRDNK-----DC-  
A41651 CAICGDRSSGKHYGVYSCEGCKGFFKRTVRKDL-----TYS-CRDNK-----DC-  
A34418 CAICGDRSSGKHYGVYSCEGCKGFFKRTVRKDL-----TYS-CRDNK-----DC-  
AAA40081.2 CAICGDRSSGKHYGVYSCEGCKGFFKRTVRKDL-----TYS-CRDNK-----DC-  
NP\_068811.1 CAICGDRSSGKHYGVYSCEGCKGFFKRTVRKDL-----TYS-CRDNK-----DC-  
S37781 CAICGDRSSGKHYGVYSCEGCKGFFKRTVRKDL-----TYS-CRDNK-----DC-  
AAL14642.1 CAICGDRSSGKHYGVYSCEGCKGFFKRTVRKDL-----TYS-CRDNK-----DC-  
AAA60293.1 CAICGDRSSGKHYGVYSCEGCKGFFKRTVRKDL-----TYS-CRDNK-----DC-  
AAH54649.1 CAICGDRSSGKHYGVYSCEGCKGFFKRTVRKDL-----SYT-CRDNK-----DC-  
NP\_571350.1 CAICGDRSSGKHYGVYSCEGCKGFFKRTVRKDL-----SYT-CRDNK-----DC-  
2NLLA CAICGDRSSGKHYGVYSCEGCKGFFKRTVRKDL-----TYT-CRDNK-----DC-  
1R0NA CAICGDRSSGKHYGVYSCEGCKGFFKRTVRKDL-----TYT-CRDNK-----DC-  
AAM18898.1 CQICGDRASGKHYGVYSCEGCKGFFKRTVRKDL-----TYA-CRDNR-----DC-  
AAM46151.1 CQICGDRASGKHYGVYSCEGCKGFFKRTVRKDL-----TYA-CRDNR-----DC-  
BAA82618.1 CAVCGDRASGKHYGVYSCEGCKGFFKRTVRKDL-----SYT-CRDSK-----DC-  
CAA36827.1 CSICGDRASGKHYGVYSCEGCKGFFKRTVRKDL-----TYA-CRENK-----NC-  
NP\_476781.1 CSICGDRASGKHYGVYSCEGCKGFFKRTVRKDL-----TYA-CRENK-----NC-  
A35872 CSICGDRASGKHYGVYSCEGCKGFFKRTVRKDL-----TYA-CRENK-----NC-  
1R00 CSICGDRASGKHYGVYSCEGCKGFFKRTVRKDL-----TYA-CRENK-----NC-  
AAG01569.1 CSICGDRASGKHYGVYSCEGCKGFFKRTVRKDL-----TYA-CREDR-----NC-  
BAD12053.1 CSICGDRASGKHYGVYSCEGCKGFFKRTVRKDL-----TYA-CREDR-----NC-  
AAC15589.1 CSICGDRASGKHYGVYSCEGCKGFFKRTVRKDL-----TYA-CREER-----RC-  
AAM54495.1 CSICGDRASGKHYGVYSCEGCKGFFKRTVRKDL-----TYA-CREER-----NC-  
USP\_MANSE CSICGDRASGKHYGVYSCEGCKGFFKRTVRKDL-----TYA-CREDR-----NC-  
BAC53670.1 CSICGDRASGKHYGVYSCEGCKGFFKRTVRKDL-----TYA-CREER-----NC-

USP\_BOMMO CSICGDRASGKHYGVYSCEGCKGFFKRTVRKDL-----TYA-CREDK-----NC-  
AAM54497.1 CSICGDRASGKHYGVYSCEGCKGFFKRTVRKDL-----TYA-CREER-----SC-  
USP\_CHOFU CSICGDRASGKHYGVYSCEGCKGFFKRTVRKDL-----SYA-CREER-----NC-  
AAB35576.1 CSICGDRASGKHYGVYSCEGCKGFFKRTVRKDL-----SYA-CREER-----NC-  
AAC03056.1 CSICGDRASGKHYGVYSCEGCKGFFKRTVRKDL-----SYA-CREER-----NC-  
AAC15588.1 CSICGDRASGKHYGVYSCEGCKGFFKRTVRKDL-----SYA-CREER-----TC-  
CAB75361.1 CSICGDRASGKHYGVYSCEGCKGFFKRTVRKDL-----SYA-CREEK-----NC-  
AAF00981.1 CSICGDRASGKHYGVYSCEGCKGFFKRTVRKDL-----SYA-CREDK-----NC-  
AAQ55293.1 CSICGDRASGKHYGVYSCEGCKGFFKRTVRKDL-----SYA-CREDK-----NC-  
AAF73057.1 CSICGDRASGKHYGVYSCEGCKGFFKRTVRKDL-----SYA-CREEK-----SC-  
AAC32789.2 CSICGDRASGKHYGVYSCEGCKGFFKRTVRKDL-----TYA-CREER-----SC-  
AAL86461.1 CAICGDRASGKHYGVYSCEGCKGFFKRTVRKDL-----TYA-CRDDK-----NC-  
AAG24886.1 CSICGDRASGKHYGVYSCEGCKGFFKRTVRKDL-----SYA-CREDK-----NC-  
AAG24887.1 CSICGDRASGKHYGVYSCEGCKGFFKRTVRKDL-----SYA-CREDK-----NC-  
AAF19033.1 CSICGDRASGKHYGVYSCEGCKGFFKRTVRKDL-----SYA-CREDK-----NC-  
XP\_320944.1 CSICGDRASGKHYGVYSCEGCKGFFKRTVRKDL-----SYA-CREDK-----NC-  
AAM08268.1 CAICGDRASGKHYGVYSCEGCKGFFKRTVRKDL-----IYL-CRENR-----NC-  
AAD33428.1 CSICSDRASGKHYGVFSCEGCKGFFKRTVRKEL-----TYI-CRDSQ-----EC-  
AAD45325.1 CSICSDRASGKHYGVFSCEGCKGFFKRTVRKEL-----TYI-CRDSQ-----EC-  
AAD16119.1 CVICGDKASGKHYGVI SCEGCKGFFKRTVRKQL-----VYV-CRESG-----QC-  
AAL29199.1 CAICGDRSSGFHYGVQSCEGCKSFFKRTVQKQL-----HYT-CVENM-----SC-  
AAL29194.1 CVVCNDKATGYHYGVFTCEGCKGFFKRTVQKQL-----EYT-CKGDG-----NC-  
AAA36763.1 CAVCGDNASCQHYGVRTCEGCKGFFKRTVQKNA-----KYI-CLANK-----DC-  
NR41\_CANFA CAVCGDNASCQHYGVRTCEGCKGFFKRTVQKNA-----KYI-CLANK-----DC-  
NP\_002126.2 CAVCGDNASCQHYGVRTCEGCKGFFKRTVQKNA-----KYI-CLANK-----DC-  
AAP36590.1 CAVCGDNASCQHYGVRTCEGCKGFFKRTVQKNA-----KYI-CLANK-----DC-  
NP\_034574.1 CAVCGDNASCQHYGVRTCEGCKGFFKRTVQKSA-----KYI-CLANK-----DC-  
NR41\_RAT CAVCGDNASCQHYGVRTCEGCKGFFKRTVQKSA-----KYI-CLANK-----DC-  
NP\_077364.1 CAVCGDNASCQHYGVRTCEGCKGFFKRTVQKSA-----KYI-CLANK-----DC-  
CAA42718.1 CAVCGDNASCQHYGVRTCEGCKGFFKRTVQKSA-----KYI-CLANK-----DC-  
1CIT CAVCGDNASCQHYGVRTCEGCKGFFKRTVQKSA-----KYI-CLANK-----DC-  
AAH56025.1 CAVCGDNASCQHYGVRTCEGCKGFFKRTVQKNA-----KYI-CLANK-----DC-  
NR42\_XENLA CAVCGDNASCQHYGVRTCEGCKGFFKRTVQKNA-----KYI-CLANK-----DC-  
NP\_006177.1 CAVCGDNAACQHYGVRTCEGCKGFFKRTVQKNA-----KYV-CLANK-----NC-  
NP\_775263.1 CAVCGDNAACQHYGVRTCEGCKGFFKRTVQKNA-----KYV-CLANK-----NC-  
NP\_775264.1 CAVCGDNAACQHYGVRTCEGCKGFFKRTVQKNA-----KYV-CLANK-----NC-  
NP\_775265.1 CAVCGDNAACQHYGVRTCEGCKGFFKRTVQKNA-----KYV-CLANK-----NC-  
AAB33999.1 CAVCGDNAACQHYGVRTCEGCKGFFKRTVQKNA-----KYV-CLANK-----NC-  
NP\_038641.1 CAVCGDNAACQHYGVRTCEGCKGFFKRTVQKNA-----KYV-CLANK-----NC-  
NP\_062201.2 CAVCGDNAACQHYGVRTCEGCKGFFKRTVQKNA-----KYV-CLANK-----NC-  
NR42\_RAT CAVCGDNAACQHYGVRTCEGCKGFFKRTVQKNA-----KYV-CLANK-----NC-  
I84692 CAVCGDNAACQHYGVRTCEGCKGFFKRTVQKNA-----KYV-CLANK-----NC-  
AAC53154.1 CAVCGDNAACQHYGVRTCEGCKGFFKRTVQKNA-----KYV-CLANK-----NC-  
BAA75461.1 CAVCGDNAACQHYGVRTCEGCKGFFKRTVQKNA-----KYV-CLANK-----NC-  
AAA42058.1 CAVCGDNAACQHYGVRTCEGCKGFFKRTVQKNA-----KYV-CLANK-----NC-  
CAC27783.1 CAVCGDNAACQHYGVRTCEGCKGFFKRTVQKNA-----KYV-CLANK-----NC-  
NP\_008912.2 CAVCGDNAACQHYGVRTCEGCKGFFKRTVQKNA-----KYV-CLANK-----NC-  
NP\_056558.1 CAVCGDNAACQHYGVRTCEGCKGFFKRTVQKNA-----KYV-CLANK-----NC-  
NP\_059048.1 CAVCGDNAACQHYGVRTCEGCKGFFKRTVQKNA-----KYV-CLANK-----NC-  
NP\_113816.1 CAVCGDNAACQHYGVRTCEGCKGFFKRTVQKNA-----KYV-CLANK-----NC-  
NP\_775291.1 CAVCGDNAACQHYGVRTCEGCKGFFKRTVQKNA-----KYV-CLANK-----NC-  
NP\_775292.1 CAVCGDNAACQHYGVRTCEGCKGFFKRTVQKNA-----KYV-CLANK-----NC-  
NR43\_HUMAN CAVCGDNAACQHYGVRTCEGCKGFFKRTVQKNA-----KYV-CLANK-----NC-  
S71930 CAVCGDNAACQHYGVRTCEGCKGFFKRTVQKNA-----KYV-CLANK-----NC-  
BAA11419.1 CAVCGDNAACQHYGVRTCEGCKGFFKRTVQKNA-----KYV-CLANK-----NC-  
CAA09763.1 CAVCGDNAACQHYGVRTCEGCKGFFKRTVQKNA-----KYV-CLANK-----NC-  
CAA09764.1 CAVCGDNAACQHYGVRTCEGCKGFFKRTVQKNA-----KYV-CLANK-----NC-

AAF05623.1 CAVCGDNAACQHYGVRTCEGCKGFFKRTVQKNA-----KYV-CLANK-----NC-  
AAB36006.1 CAVCGDNAACQHYGVRTCEGCKGFFKRTVQKNA-----KYV-CLANK-----NC-  
AAB02581.1 CAVCGDNAACQHYGVRTCEGCKGFFKRTVQKNA-----KYV-CLANK-----NC-  
CAA05172.1 CAVCGDTAACQHYGVRTCEGCKGFFKRTVQKGS-----KYV-CLADK-----NC-  
NP\_788079.1 CAVCGDTAACQHYGVRTCEGCKGFFKRTVQKGS-----KYV-CLADK-----NC-  
CAA75690.1 CAVCGDTAACQHYGVRTCEGCKGFFKRTVQKGS-----KYV-CLADK-----NC-  
HR38\_DROME CAVCGDTAACQHYGVRTCEGCKGFFKRTVQKGS-----KYV-CLADK-----NC-  
NP\_477119.1 CAVCGDTAACQHYGVRTCEGCKGFFKRTVQKGS-----KYV-CLADK-----NC-  
AAC46926.1 CAVCGDTAACQHYGVRTCEGCKGFFKRTVQKGS-----KYV-CLADK-----NC-  
S58238 CAVCGDTAACQHYGVRTCEGCKGFFKRTVQKGS-----KYV-CLADK-----NC-  
HR38\_BOMMO CAVCGDTAACQHYGVRTCEGCKGFFKRTVQKGS-----KYV-CLAEK-----SC-  
AAF23095.1 CAVCGDTAACQHYGVRTCEGCKGFFKRTVQKGS-----KYV-CLADK-----AC-  
XP\_317123.1 CAVCGDTAACQHYGVRTCEGCKGFFKRTVQKGS-----KYV-CLADK-----AC-  
G88408 CAVCNDRAVCLHYGARTCEGCKGFFKRTVQKNS-----KYT-CAGNK-----TC-  
NP\_497731.1 CAVCNDRAVCLHYGARTCEGCKGFFKRTVQKNS-----KYT-CAGNK-----TC-  
AAA96984.1 CAVCNDRAVCLHYGARTCEGCKGFFKRTVQKNS-----KYT-CAGNK-----TC-  
AAG15119.1 CAVCNDRAVCLHYGARTCEGCKGFFKRTVQKNS-----KYT-CAGNK-----TC-  
CAE64932.1 CAVCNDRAVCLHYGARTCEGCKGFFKRTVQKNS-----KYT-CAGNK-----NC-  
AAC61752.1 CAVCNDRTVCQHYGARTCEGCKGFFKRTVQKKA-----QYV-CTGNK-----NC-  
AAC80008.1 CSVCSKAYVKHYGVFACEGCKGFFKRSVRRNR-----KYS-CLGKR-----HC-  
CAD57002.1 CKICGDTASGNHFGVQSCEACKSFFRRSVRANA-----RYA-CRGSR-----NC-  
7UP2\_DROME CVVCGDKSSGKHYGQFTCEGCKSFFKRSVRRNL-----TYS-CRGSR-----NC-  
NP\_731681.1 CVVCGDKSSGKHYGQFTCEGCKSFFKRSVRRNL-----TYS-CRGSR-----NC-  
NP\_524325.1 CVVCGDKSSGKHYGQFTCEGCKSFFKRSVRRNL-----TYS-CRGSR-----NC-  
AAG53940.1 CVVCGDKSSGKHYGQFTCEGCKSFFKRSVRRNL-----TYS-CRGNR-----NC-  
XP\_312394.1 CVVCGDKSSGKHYGQFTCEGCKSFFKRSVRRNL-----TYS-CRGNR-----NC-  
BAB55582.1 CVVCGDKSSGKHYGQFTCEGCKSFFKRSVRRNL-----TYS-CRGNR-----SC-  
BAB88907.1 CVVCGDKSSGKHYGQFTCEGCKSFFKRSVRRNL-----TYS-CRGNR-----SC-  
AAA19853.1 CVVCGDKSSGKHYGQFTCEGCKSFFKRSVRRNL-----TYT-CRANR-----NC-  
AAH56574.1 CVVCGDKSSGKHYGQFTCEGCKSFFKRSVRRNL-----TYT-CRANR-----NC-  
XP\_346612.1 CVVCGDKSSGKHYGQFTCEGCKSFFKRSVRRNL-----TYT-CRANR-----NC-  
NP\_786998.1 CVVCGDKSSGKHYGQFTCEGCKSFFKRSVRRNL-----TYT-CRANR-----NC-  
AAD42224.1 CVVCGDKSSGKHYGQFTCEGCKSFFKRSVRRNL-----TYT-CRANR-----NC-  
NP\_571255.1 CVVCGDKSSGKHYGQFTCEGCKSFFKRSVRRNL-----TYT-CRANR-----NC-  
NP\_112392.1 CVVCGDKSSGKHYGQFTCEGCKSFFKRSVRRNL-----TYT-CRANR-----NC-  
NP\_005645.1 CVVCGDKSSGKHYGQFTCEGCKSFFKRSVRRNL-----TYT-CRANR-----NC-  
NP\_034281.1 CVVCGDKSSGKHYGQFTCEGCKSFFKRSVRRNL-----TYT-CRANR-----NC-  
CAA34277.1 CVVCGDKSSGKHYGQFTCEGCKSFFKRSVRRNL-----TYT-CRANR-----NC-  
AAA21479.1 CVVCGDKSSGKHYGQFTCEGCKSFFKRSVRRNL-----SYT-CRANR-----NC-  
NP\_989752.1 CVVCGDKSSGKHYGQFTCEGCKSFFKRSVRRNL-----SYT-CRANR-----NC-  
NP\_542956.1 CVVCGDKSSGKHYGQFTCEGCKSFFKRSVRRNL-----SYT-CRANR-----NC-  
NP\_066285.1 CVVCGDKSSGKHYGQFTCEGCKSFFKRSVRRNL-----SYT-CRANR-----NC-  
CAA54096.1 CVVCGDKSSGKHYGQFTCEGCKSFFKRSVRRNL-----SYT-CRANR-----NC-  
AAP82999.1 CVVCGDKSSGKHYGQFTCEGCKSFFKRSVRRNL-----SYT-CRANR-----NC-  
NP\_776827.1 CVVCGDKSSGKHYGQFTCEGCKSFFKRSVRRNL-----SYT-CRANR-----NC-  
AAB37686.1 CVVCGDKSSGKHYGQFTCEGCKSFFKRSVRRNL-----TYT-CRANR-----NC-  
AAH44975.1 CVVCGDKSSGKHYGQFTCEGCKSFFKRSVRRNL-----TYT-CRANR-----NC-  
NP\_571258.1 CVVCGDKSSGKHYGQFTCEGCKSFFKRSVRRNL-----TYT-CRANR-----NC-  
AAH56748.1 CVVCGDKSSGKHYGQFTCEGCKSFFKRSVRRNL-----SYT-CRANR-----NC-  
AAH65651.1 CVVCGDKSSGKHYGQFTCEGCKSFFKRSVRRNL-----SYT-CRANR-----NC-  
AAO61416.1 CVVCGDKSSGKHYGQFTCEGCKSFFKRSVRRNL-----TYS-CRGNR-----TC-  
NP\_571261.1 CMVCGDKSSGKHYGQFTCEGCKSFFKRSVRRNL-----SYT-CRGNR-----DC-  
S20617 CLVCGDKSSGKHYGQFTCEGCKSFFKRSVRRNL-----TYT-CRSNR-----DC-  
A46358 CVVCHDKSSGKHYGQFTCEGCKSFFKRSVRRNL-----TYS-CRANR-----NC-  
AAL29200.1 CAVCGDKSSGKHYGVFTCEGCKSFFKRSVRRNL-----SYT-CRASR-----NC-  
AAH02669.2 CVVCGDKSSGKHYGVFTCEGCKSFFKRSVRRNL-----SYT-CRSNR-----DC-  
NP\_005225.2 CVVCGDKSSGKHYGVFTCEGCKSFFKRSVRRNL-----SYT-CRSNR-----DC-

AAH63018.1 CVVCGDKSSGKHYGVFTCEGCKSF FFKRS IRRNL-----SYT-CRSNR-----DC-  
S02709 CVVCGDKSSGKHYGVFTCEGCKSF FFKRT IRRNL-----SYT-CRSNR-----DC-  
EAR2\_MOUSE CVVCGDKSSGKHYGVFTCEGCKSF FFKRT IRRNL-----SYT-CRSNR-----DC-  
NP\_034280.1 CVVCGDKSSGKHYGVFTCEGCKSF FFKRT IRRNL-----SYT-CRSNR-----DC-  
AAH08138.1 CVVCGDKSSGKHYGVFTCEGCKSF FFKRS IRRNL-----SYT-CRSNR-----DC-  
NP\_620813.1 CVVCGDKSSGKHYGVFTCEGCKSF FFKRT IRRNL-----SYT-CRSNR-----DC-  
AAH56043.1 CVVCGDKSSGKHYGVFTCEGCKSF FFKRSVRRNL-----SYT-CRSNR-----DC-  
AAH65330.1 CVVCGDKSSGKHYGVFTCEGCKSF FFKRSVRRNL-----NYT-CRSNR-----DC-  
AAH65332.1 CVVCGDKSSGKHYGVFTCEGCKSF FFKRS IRRNL-----NYT-CRSNR-----EC-  
NP\_492181.1 CVVCGDKSSGKHYGQFSCEGCKSF FFKRS IRRSL-----SYT-CRATK-----NC-  
AAL29198.1 CSVCGDHSTGRHYGANTCEGCKLFFKRS IKKQL-----YYT-CRVTG-----CC-  
A36738 CVVCGDKASGRHYGAVTCEGCKGFFKRS IRKNL-----VYS-CRGSK-----DC-  
NP\_003288.1 CVVCGDKASGRHYGAVTCEGCKGFFKRS IRKNL-----VYS-CRGSK-----DC-  
BAB60786.1 CVVCGDKASGRHYGAVTCEGCKGFFKRS IRKNL-----VYS-CRGSK-----DC-  
TR2\_HUMAN CVVCGDKASGRHYGAVTCEGCKGFFKRS IRKNL-----VYS-CRGSK-----DC-  
NP\_665723.1 CVVCGDKASGRHYGAVTCEGCKGFFKRS IRKNL-----VYS-CRGSK-----DC-  
AAC53253.1 CVVCGDKASGRHYGAVTCEGCKGFFKRS IRKNL-----VYS-CRGSK-----DC-  
NP\_035759.2 CVVCGDKASGRHYGAVTCEGCKGFFKRS IRKNL-----VYS-CRGSK-----DC-  
AAC29502.1 CVVCGDKASGRHYGAVTCEGCKGFFKRS IRKNL-----VYS-CRGSK-----DC-  
NP\_989455.1 CVVCGDKASGRHYGAVTCEGCKGFFKRS IRKNL-----VYS-CRGTK-----DC-  
AAB81178.1 CVVCGDKASGRHYGAVTCEGCKGFFKRS IRKNL-----VYT-CRGSK-----DC-  
AAB69281.1 CVVCGDKASGRHYGAVTCEGCKGFFKRS IRKNL-----VYT-CRGSK-----EC-  
NP\_059019.1 CVVCGDKASGRHYGAVSCEGCKGFFKRS VRKNL-----TYS-CRSSQ-----DC-  
TR4\_MOUSE CVVCGDKASGRHYGAVSCEGCKGFFKRS VRKNL-----TYS-CRSSQ-----DC-  
I54075 CVVCGDKASGRHYGAVSCEGCKGFFKRS VRKNL-----TYS-CRSSQ-----DC-  
I59309 CVVCGDKASGRHYGAVSCEGCKGFFKRS VRKNL-----TYS-CRSSQ-----DC-  
NP\_003289.2 CVVCGDKASGRHYGAVSCEGCKGFFKRS VRKNL-----TYS-CRSNQ-----DC-  
TR4\_HUMAN CVVCGDKASGRHYGAVSCEGCKGFFKRS VRKNL-----TYS-CRSNQ-----DC-  
AAH51670.1 CVVCGDKASGRHYGAVSCEGCKGFFKRS VRKNL-----TYS-CRSNQ-----DC-  
AAM46150.1 CVVCGDKASGRHYGAI SCEGCKGFFKRS IRKNL-----GYV-CRSSK-----EC-  
AAB19174.1 CAVCGDKASGRHYGAI SCEGCKGFFKRS IRKHL-----GYT-CRGNK-----DC-  
AAB19176.1 CAVCGDKASGRHYGAI SCEGCKGFFKRS IRKHL-----GYT-CRGNK-----DC-  
AAQ55494.1 CVVCGDKASGRHYGAVSCEGCKGFFKRS IRKRI-----GYV-CRSQK-----DC-  
AAQ55495.1 CVVCGDKASGRHYGAVSCEGCKGFFKRS IRKRI-----GYV-CRSQK-----DC-  
NH41\_CAEEEL CVVCGDKASGRHYGAVSCEGCKGFFKRS IRKRI-----GYV-CRSQK-----DC-  
AAC43032.1 CVVCGDKASGRHYGAVSCEGCKGFFKRS IRKQI-----GYV-CRGTK-----DC-  
AAC46924.1 CLVCGDRASGRHYGAI SCEGCKGFFKRS IRKQL-----GYQ-CRGAM-----NC-  
NP\_730636.1 CLVCGDRASGRHYGAI SCEGCKGFFKRS IRKQL-----GYQ-CRGAM-----NC-  
HR78\_DROME CLVCGDRASGRHYGAI SCEGCKGFFKRS IRKQL-----GYQ-CRGAM-----NC-  
NP\_524203.2 CLVCGDRASGRHYGAI SCEGCKGFFKRS IRKQL-----GYQ-CRGAM-----NC-  
CAA06690.1 CVVCGDRASGRHYGAI SCEGCKGFFKRS IRKQL-----GYQ-CRGSK-----NC-  
XP\_317069.1 CLVCGDRASGRHYGAI SCEGCKGFFKRS IRKQL-----GYQ-CRGSK-----NC-  
AAL83722.1 CIVCGDRASGRHYGAI SCEGCKGFFKRS IRKKL-----GYQ-CRGTM-----NC-  
AAL29196.1 CLVCGDRASGKHYGIVACEGCKGFFKRS IRKNL-----HYS-CQGNG-----AC-  
AAL29197.1 CLVCGDRASGKHYGIVACEGCKGFFKRS IRKNL-----HYS-CQGNG-----AC-  
AAL29201.1 CLVCGDRGTGKHYGIVACEGCKGFFKRS VRKNL-----HYR-CQGNG-----AC-  
AAH30600.1 CLICGDRATGLHYGII SCEGCKGFFKRS ICNKR-----VYR-CRSDK-----NC-  
NP\_201592.1 CLICGDRATGLHYGII SCEGCKGFFKRS ICNKR-----VYR-CRSDK-----NC-  
NP\_001480.2 CLICGDRATGLHYGII SCEGCKGFFKRS ICNKR-----VYR-CRSDK-----NC-  
NP\_034394.1 CLICGDRATGLHYGII SCEGCKGFFKRS ICNKR-----VYR-CRSDK-----NC-  
NR61\_HUMAN CLICGDRATGLHYGII SCEGCKGFFKRS ICNKR-----VYR-CRSDK-----NC-  
XP\_342428.1 CLICGDRATGLHYGII SCEGCKGFFKRS ICNKR-----VYR-CRSDK-----NC-  
NP\_201591.1 CLICGDRATGLHYGII SCEGCKGFFKRS ICNKR-----VYR-CRSDK-----NC-  
AAB06335.1 CLICGDRATGLHYGII SCEGCKGFFKRS ICKKR-----VYR-CRSDK-----NC-  
NP\_571331.1 CLICGDRATGLHYGII SCEGCKGFFKRT ICNKR-----VYR-CRSDK-----NC-  
AAC60126.1 CLICGDRATGLHYGII SCEGCKGFFKRT ICNKR-----VYR-CRSDK-----NC-  
CAE30390.1 CLICGDRASGLHYGII SCEGCKGFFKRS ICNKR-----IYR-CNRDK-----NC-

AAM95452.1 CLICGDRATGLHYGIIITCEGCKGFFKRSICNKR-----VYR-CSRDK-----NC-  
AAL50350.1 CMICEDKATGLHYGIIITCEGCKGFFKRTVQNRR-----VYT-CVADG-----GC-  
AAM54498.1 CMICEDKATGLHYGIIITCEGCKGFFKRTVQNRR-----VYT-CVADG-----GC-  
AAD38900.1 CMICEDKATGLHYGIIITCEGCKGFFKRTVQNRR-----VYT-CVADG-----GC-  
CAA22836.1 CMICEDKATGLHYGIIITCEGCKGFFKRTVQNRR-----VYT-CVADG-----TC-  
NP\_569967.2 CMICEDKATGLHYGIIITCEGCKGFFKRTVQNRR-----VYT-CVADG-----TC-  
NP\_996331.1 CMICEDKATGLHYGIIITCEGCKGFFKRTVQNRR-----VYT-CVADG-----TC-  
XP\_318161.1 CMICEDKATGLHYGIIITCEGCKGFFKRTVQNRR-----VYT-CVADG-----TC-  
CAA06670.1 CMICEDKATGLHYGIIITCEGCKGFFKRTVQNRR-----VYT-CVADG-----NC-  
AAG15181.1 CSVCGDKSTGLHYGAATCEGCKGFFKRSVQNKK-----VYH-CSQDN-----CC-  
NP\_510536.1 CSVCGDKSTGLHYGAATCEGCKGFFKRSVQNKK-----VYH-CSQDN-----CC-  
AAG15183.1 CSVCGDKSTGLHYGAATCEGCKGFFKRSVQNKK-----VYH-CSQDN-----CC-  
CAE63296.1 CSVCADKSTGLHYGASTCEGCKGFFKRSVQNKK-----VYH-CSQDN-----CC-  
NP\_491689.2 CMVCGDNSTGYHYGVQSCEGCKGFFRRSVHKNI-----AYV-CTKGENCTFSYENC-  
T34026 CMVCGDNSTGYHYGVQSCEGCKGFFRRSVHKNI-----AYV-CTKGENCTFSYENC-  
NHR2\_CAEEEL CMVCGDNSTGYHYGVQSCEGCKGFFRRSVHKNI-----AYV-CTKGENCTFSYENC-  
AAK17971.1 CMVCGDNSTGYHYGVQSCEGCKGFFRRSVHKNI-----AYV-CTKGENCTFSYENC-  
AAK17972.1 CMVCGDNSTGYHYGVQSCEGCKGFFRRSVHKNI-----AYV-CTKGENCTFSYENC-  
CAE60452.1 CQICGDSASGYHYGVLSCGCKGFFRRSVHRKS-----TYV-CQKGAACSFSLENC-  
1HCP CAVCNDYASGYHYGVWSCEGCKAFFKRSIQGH-----NDYMC PATN-----QC-  
AAA58461.1 CAVCNDYASGYHYGVWSCEGCKAFFKRSIQGH-----NDYMC PATN-----QC-  
AAD31032.1 CAVCSDYASGYHYGVWSCEGCKAFFKRSIQGH-----NDYMC PATN-----QC-  
AAL82743.1 CAVCSDYASGYHYGVWSCEGCKAFFKRSIQGH-----NDYMC PATN-----QC-  
ESR1\_SPAAU CAVCSDYASGYHYGVWSCEGCKAFFKRSIQGH-----NDYMC PATN-----QC-  
ESR1\_PAGMA CAVCSDYASGYHYGVWSCEGCKAFFKRSIQGH-----NDYMC PATN-----QC-  
AAG44622.2 CAVCSDYASGYHYGVWSCEGCKAFFKRSIQGH-----NDYMC PATN-----QC-  
AAO66473.1 CAVCSDYASGYHYGVWSCEGCKAFFKRSIQGH-----NDYMC PATN-----QC-  
BAB85622.1 CAVCSDYASGYHYGVWSCEGCKAFFKRSIQGH-----NDYMC PATN-----QC-  
AAG48341.1 CAVCSDYASGYHYGVWSCEGCKAFFKRSIQGH-----NDYMC PATN-----QC-  
AAP72178.1 CAVCSDYASGYHYGVWSCEGCKAFFKRSIQGH-----NDYMC PATN-----QC-  
BAC76957.1 CAVCSDYASGYHYGVWSCEGCKAFFKRSIQGH-----NDYMC PATN-----QC-  
ESR1\_ORYLA CAVCSDYASGYHYGVWSCEGCKAFFKRSIQGH-----NDYMC PATN-----QC-  
AAR82891.1 CAVCSDYASGYHYGVWSCEGCKAFFKRSIQGH-----NDYMC PATN-----QC-  
ESR1\_ORENI CAVCSDYASGYHYGVWSCEGCKAFFKRSIQGH-----NDYMC PATN-----QC-  
ESR1\_OREAU CAVCSDYASGYHYGVWSCEGCKAFFKRSIQGH-----NDYMC PATN-----QC-  
ESR1\_SHEEP CAVCNDYASGYHYGVWSCEGCKAFFKRSIQGH-----NDYMC PATN-----QC-  
NP\_990514.1 CAVCNDYASGYHYGVWSCEGCKAFFKRSIQGH-----NDYMC PATN-----QC-  
QRCHE CAVCNDYASGYHYGVWSCEGCKAFFKRSIQGH-----NDYMC PATN-----QC-  
ESR1\_POEGU CAVCNDYASGYHYGVWSCEGCKAFFKRSIQGH-----NDYMC PATN-----QC-  
AAN63674.1 CAVCNDYASGYHYGVWSCEGCKAFFKRSIQGH-----NDYMC PATN-----QC-  
BAB79436.1 CAVCNDYASGYHYGVWSCEGCKAFFKRSIQGH-----NDYMC PATN-----QC-  
BAD08348.1 CAVCNDYASGYHYGVWSCEGCKAFFKRSIQGH-----NDYMC PATN-----QC-  
1HCQ CAVCNDYASGYHYGVWSCEGCKAFFKRSIQGH-----NDYMC PATN-----QC-  
AAD47137.1 CAVCNDYASGYHYGVWSCEGCKAFFKRSIQGH-----NDYMC PATN-----QC-  
S64737 CAVCNDYASGYHYGVWSCEGCKAFFKRSIQGH-----NDYMC PATN-----QC-  
AAD52984.1 CAVCNDYASGYHYGVWSCEGCKAFFKRSIQGH-----NDYMC PATN-----QC-  
CAE45969.1 CAVCNDYASGYHYGVWSCEGCKAFFKRSIQGH-----NDYMC PATN-----QC-  
NP\_000116.1 CAVCNDYASGYHYGVWSCEGCKAFFKRSIQGH-----NDYMC PATN-----QC-  
ESR1\_HUMAN CAVCNDYASGYHYGVWSCEGCKAFFKRSIQGH-----NDYMC PATN-----QC-  
CAC42096.1 CAVCNDYASGYHYGVWSCEGCKAFFKRSIQGH-----NDYMC PATN-----QC-  
AAK52104.1 CAVCNDYASGYHYGVWSCEGCKAFFKRSIQGH-----NDYMC PATN-----QC-  
AAS46251.1 CAVCNDYASGYHYGVWSCEGCKAFFKRSIQGH-----NDYMC PATN-----QC-  
ESR1\_PIG CAVCNDYASGYHYGVWSCEGCKAFFKRSIQGH-----NDYMC PATN-----QC-  
ESR1\_HORSE CAVCNDYASGYHYGVWSCEGCKAFFKRSIQGH-----NDYMC PATN-----QC-  
CAA43411.1 CAVCNDYASGYHYGVWSCEGCKAFFKRSIQGH-----NDYMC PATN-----QC-  
NP\_036821.1 CAVCNDYASGYHYGVWSCEGCKAFFKRSIQGH-----NDYMC PATN-----QC-  
NP\_031982.1 CAVCNDYASGYHYGVWSCEGCKAFFKRSIQGH-----NDYMC PATN-----QC-

ESR1\_MESAU CAVCNDYASGYHYGVWSCEGCKAFFKRSIQGH-----NDYMC PATN-----QC-  
AAR23923.1 CAVCNDYASGYHYGVWSCEGCKAFFKRSIQGH-----NDYMC PATN-----QC-  
BAB79437.1 CAVCNDYASGYHYGVWSCEGCKAFFKRSIQGH-----NDYMC PATN-----QC-  
AAQ84782.1 CAVCSDYASGYHYGVWSCEGCKAFFKRSIQGH-----NDYMC PATN-----QC-  
AAQ84784.1 CAVCSDYASGYHYGVWSCEGCKAFFKRSIQGH-----NDYMC PATN-----QC-  
NP\_988866.1 CAVCSDYASGYHYGVWSCEGCKAFFKRSIQGH-----NDYMC PATN-----QC-  
ESR1\_XENLA CAVCSDYASGYHYGVWSCEGCKAFFKRSIQGH-----NDYMC PATN-----QC-  
AAQ84783.1 CAVCSDYASGYHYGVWSCEGCKAFFKRSIQGH-----NDYMC PATN-----QC-  
AAK28730.1 CAVCNDYASGYHYRVWSCEGCKAFFKRSIQGH-----NDYMC PATN-----QC-  
AAC69548.1 CSVCSDYASGYHYGVWSCEGCKAFFKRSIQGH-----NDYVCPATN-----QC-  
ESR1 ICTPU CSVCSDYASGYHYGVWSCEGCKAFFKRSIQGH-----NDYVCPATN-----QC-  
CAC37560.1 CAVCSDYASGYHYGVWSCEGCKAFFKRSIQGH-----NDYVCPATN-----QC-  
BAB16893.1 CAVCSDYASGYHYGVWSCEGCKAFFKRSIQGH-----NDYVCPATN-----QC-  
NP\_694491.1 CAVCSDYASGYHYGVWSCEGCKAFFKRSIQGH-----NDYVCPATN-----QC-  
AAL12298.1 CAVCSDYASGYHYGVWSCEGCKAFFKRSIQGH-----NDYVCPATN-----QC-  
CAB45140.1 CAVCSDFASGYHYGVWSCEGCKAFFKRSIQGH-----NDYMC PATN-----QC-  
ESR1\_ONCMY CAVCSDFASGYHYGVWSCEGCKAFFKRSIQGH-----NDYMC PATN-----QC-  
ESR1\_SALSA CAVCSDFASGYHYGFWSCEGCKAFFKRSIQGH-----NDYMC PATN-----QC-  
A37197 CAVCSDFASGYHYGVWSCEGCKAFFKRSIQGH-----NDYMC PATN-----QC-  
AAK20929.1 CAVCSDYASGYHYGVWSCEGCKAFFKRSIQGH-----NDYMC PATN-----QC-  
AAB97424.1 CAVCSDYASGYHYGVWSCEGCKAFFKRSIQGH-----NDYICPATN-----QC-  
JW0046 CAVCSDYASGYHYGVWSCEGCKAFFKRSIQGH-----NDYICPATN-----QC-  
CAA05631.1 CAVCSDYASGYHYGVWPCEGCKAFFKRSIQGH-----NDYICPATN-----QC-  
ESR2\_RAT CPVCSDYASGYHYGVWSCEGCKAFFKRSIQGH-----NDYICPATN-----QC-  
NP\_036886.1 CPVCSDYASGYHYGVWSCEGCKAFFKRSIQGH-----NDYICPATN-----QC-  
BAA25431.1 CPVCSDYASGYHYGVWSCEGCKAFFKRSIQGH-----NDYICPATN-----QC-  
ESR2\_MOUSE CAVCSDYASGYHYGVWSCEGCKAFFKRSIQGH-----NDYICPATN-----QC-  
NP\_034287.2 CAVCSDYASGYHYGVWSCEGCKAFFKRSIQGH-----NDYICPATN-----QC-  
BAC35719.1 CAVCSDYASGYHYGVWSCEGCKAFFKRSIQGH-----NDYICPATN-----QC-  
AAL15175.1 CAVCSDYASGYHYGVWSCEGCKAFFKRSIQGH-----NDYICPATN-----QC-  
CAA03949.1 CAVCSDYASGYHYGVWSCEGCKAFFKRSIQGH-----NDYICPATN-----QC-  
ESR2\_BOVIN CAVCSDYASGYHYGVWSCEGCKAFFKRSIQGH-----NDYICPATN-----QC-  
NP\_776476.1 CAVCSDYASGYHYGVWSCEGCKAFFKRSIQGH-----NDYICPATN-----QC-  
ESR2\_SHEEP CAVCSDYASGYHYGVWSCEGCKAFFKRSIQGH-----NDYICPATN-----QC-  
CAC42097.1 CAVCSDYASGYHYGVWSCEGCKAFFKRSIQGH-----NDYICPATN-----QC-  
AAC05751.1 CAVCSDYASGYHYGVWSCEGCKAFFKRSIQGH-----NDYICPATN-----QC-  
S71400 CAVCSDYASGYHYGVWSCEGCKAFFKRSIQGH-----NDYICPATN-----QC-  
AAC25603.1 CAVCSDYASGYHYGVWSCEGCKAFFKRSIQGH-----NDYICPATN-----QC-  
AAC15234.1 CAVCSDYASGYHYGVWSCEGCKAFFKRSIQGH-----NDYICPATN-----QC-  
AAD32580.1 CAVCSDYASGYHYGVWSCEGCKAFFKRSIQGH-----NDYICPATN-----QC-  
NP\_001428.1 CAVCSDYASGYHYGVWSCEGCKAFFKRSIQGH-----NDYICPATN-----QC-  
AAK71318.1 CAVCSDYASGYHYGVWSCEGCKAFFKRSIQGH-----NDYICPATN-----QC-  
ESR2\_CALJA CAVCSDYASGYHYGVWSCEGCKAFFKRSIQGH-----NDYICPATN-----QC-  
AAK71317.1 CAVCSDFASGYHYGVWSCEGCKAFFKRSIQGH-----NDYICPATN-----QC-  
AAK15151.1 CAVCSDYASGYHYGVWSCEGCKAFFKRSIQGH-----NDYICPATN-----QC-  
ESR2\_PIG CAVCSDYASGYHYGVWSCEGCKAFFKRSIQGH-----NDYICPATN-----QC-  
ESR2\_COTJA CAVCSDYASGYHYGVWSCEGCKAFFKRSIQGH-----NDYICPATN-----QC-  
NP\_990125.1 CAVCSDYASGYHYGVWSCEGCKAFFKRSIQGH-----NDYICPATN-----QC-  
ESR2\_STUVU CAVCSDYASGYHYGVWSCEGCKAFFKRSIQGH-----NDYICPATN-----QC-  
AAD47637.1 CPVCSDYASGYHYGVWSCEGCKAFFKRSIQGH-----NDYICPATN-----QC-  
AAK77002.1 CAVCSDYASGYHYGVWSCEGCKAFFKRSIQGH-----NDYICPATN-----QC-  
AAO39210.1 CAVCHDYASGYHYGVWSCEGCKAFFKRSIQGH-----NDYICPATN-----QC-  
ESR2\_MICUN CAVCHDYASGYHYGVWSCEGCKAFFKRSIQGH-----NDYICPATN-----QC-  
AAP72179.1 CAVCHDYASGYHYGVWSCEGCKAFFKRSIQGH-----NDYICPATN-----QC-  
BAD02929.1 CAVCHDYASGYHYGVWSCEGCKAFFKRSIQGH-----NDYICPATN-----QC-  
ESR2\_ANGJA CAVCHDYASGYHYGVWSCEGCKAFFKRSIQGH-----NGYICPATN-----QC-  
CAC85356.1 CAVCHDYASGYHYGVWSCEGCKAFFKRSIQGH-----NDYMC PATN-----QC-

CAC85366.1 CAVCHDYASGYHYGVWSCEGCKAFFKRSIQGH-----NDYICPATN-----QC-  
ERB2\_CARAU CAVCHDYASGYHYGVWSCEGCKAFFKRSIQGH-----NDYICPATN-----QC-  
CAC93848.1 CAVCHDYASGYHYGVWSCEGCKAFFKRSIQGH-----NDYICPATN-----QC-  
NP\_777287.1 CAVCHDYASGYHYGVWSCEGCKAFFKRSIQGH-----NDYICPATN-----QC-  
ESR2 ICTPU CVVCHDYASGYHYGVWSCEGCKAFFKRSIQGH-----NDYICPATN-----QC-  
AAK16742.1 CAVCSDYASGYHYGVWSCEGCKAFFKRSIQGH-----NDYICPATN-----QC-  
NP\_851297.1 CAVCSDYASGYHYGVWSCEGCKAFFKRSIQGH-----NDYICPATN-----QC-  
AAN60793.1 CAVCSDYASGYHYGVWSCEGCKAFFKRSIQGH-----NDYICPATN-----QC-  
CAC93849.1 CAVCSDYASGYHYGVWSCEGCKAFFKRSIQGH-----NDYICPATN-----QC-  
ERB1\_CARAU CAVCSDYASGYHYGVWSCEGCKAFFKRSIQGH-----NDYICPATN-----QC-  
BAB91218.1 CAVCSDYASGYHYGVWSCEGCKAFFKRSIQGH-----NDYICPATN-----QC-  
ESR2\_ONCMY CAVCSDYASGYHYGVWSCEGCKAFFKRSIQGH-----NDYICPATN-----QC-  
AAR92486.1 CAVCHDYASGYHYGVWSCEGCKAFFKRSIQGH-----NDYICPATN-----QC-  
AAL82742.1 CAVCHDYASGYHYGVWSCEGCKAFFKRSIQRH-----NDYICPATN-----QC-  
ESR2\_SPAAU CAVCHDYASGYHYGVWSCEGCKAFFKRSIQRH-----NDYICPATN-----QC-  
AAO39211.1 CAVCQDYASGYHYGVWSCEGCKAFFKRSIQRH-----NDYICPATN-----QC-  
ESR3\_MICUN CAVCHDYASGYHYGVWSCEGCKAFFKRSIQRD-----NEYICPATN-----EC-  
BAB85623.1 CAVCHDYASGYHYGVWSCEGCKAFFKRSIQGH-----NDYICPATN-----QC-  
ESR2\_ORENI CAVCHDYASGYHYGVWSCEGCKAFFKRSIQGH-----NDYICPATN-----QC-  
BAB79705.1 CAVCHDYASGYHYGVWSCEGCKAFFKRSIQGH-----TDYICPATN-----QC-  
AAK57823.1 CAVCNDFASGYHYGVWSCEGCKAFFKRSIQGH-----NAYICPATN-----QC-  
AAB97426.1 CAVCSDYASGYHYGVWSCEGCKAFFKRSIQGS-----RRERCYR-----  
AAB97427.1 CAVCSDYASGYHYGVWSCEGCKAFFKRSIQGS-----RRERCYR-----  
AAO89568.1 CAVCSDYASGYHYGVWSCEGCKAFFKRSIQGH-----N-----  
AAA58462.1 CAVCNDYASGYHYGVWSCEGCKAFFKRSIQEL-----PT-LC-----  
AAQ95045.1 CQVCSDNASGFHYGVWSCEGCKAFFKRSIQGP-----VDYICPATN-----TC-  
AAC05114.1 CAVCSDFASGYHYGFWSCEGCKAFFKRSIQ-----  
XP\_234426.2 CLVCGDIASGYHYGAVSCEACKAFFKRTIQGK-----EVYRNQHVV-----LT-  
CAE68258.1 CVVCGDKASGRHYGAVSCEGCKGFFKRSIRKR-----VTDKINLPQ-----LL-  
NP\_500074.1 CVVCGDKASGRHYGAVSCEGCKGFFKRSIRKR-----TADKIKLGQ-----LL-  
AAL68274.1 CLVCGDRASGYHYNALTCEGCKGFFRRSVTKS-----AVYCKFGR-----AC-  
NP\_724456.1 CLVCGDRASGYHYNALTCEGCKGFFRRSVTKS-----AVYCKFGR-----AC-  
NP\_724459.1 CLVCGDRASGYHYNALTCEGCKGFFRRSVTKS-----AVYCKFGR-----AC-  
NP\_724460.1 CLVCGDRASGYHYNALTCEGCKGFFRRSVTKS-----AVYCKFGR-----AC-  
1R0NB CLVCGDRASGYHYNALTCEGCKGFFRRSVTKS-----AVYCKFGR-----AC-  
AAG02187.2 CLVCGDRASGYHYNALTCEGCKGFFRRSVTKS-----AVYCKFGR-----AC-  
AAG46050.1 CLVCGDRASGYHYNALTCEGCKGFFRRSVTKN-----AVYCKFGH-----AC-  
ECR\_LUCCU CLVCGDRASGYHYNALTCEGCKGFFRRSVTKN-----AVYCKFGH-----AC-  
CAA11907.1 CLVCGDRASGYHYNALTCEGCKGFFRRSVTKN-----AVYCKFGR-----SC-  
AAQ23183.1 CLVCGDRESGYHYNALTCEGCKGFFRRSVTKN-----AVYCKFGH-----AC-  
ECR\_AEDAE CLVCGDRESGYHYNALTCEGCKGFFRRSVTKN-----AVYCKFGH-----AC-  
AAF19032.1 CLVCGDRASGYHYNALTCEGCKGFFRRSVTKN-----AVYCKFGH-----AC-  
ECR\_CHITE CLVCGDRASGYHYNALTCEGCKGFFRRSVTKN-----AVYCKFGH-----EC-  
BAA07890.1 CLVCGDRASGYHYNALTCEGCKGFFRRSVTKN-----AVYCKFGH-----AC-  
ECR\_BOMMO CLVCGDRASGYHYNALTCEGCKGFFRRSVTKN-----AVYCKFGH-----AC-  
AAA87340.1 CLVCGDRASGYHYNALTCEGCKGFFRRSVTKN-----AVYCKFGH-----AC-  
BAC44997.1 CLVCGDRASGYHYNALTCEGCKGFFRRSVTKN-----AVYCKFGH-----AC-  
AAC36491.2 CLVCGDRASGYHYNALTCEGCKGFFRRSVTKN-----AVYCKFGH-----AC-  
AAC61596.2 CLVCGDRASGYHYNALTCEGCKGFFRRSVTKN-----AVYCKFGH-----AC-  
BAC11713.1 CLVCGDRASGYHYNALTCEGCKGFFRRSVTKN-----AVYCKFGH-----AC-  
BAC11714.1 CLVCGDRASGYHYNALTCEGCKGFFRRSVTKN-----AVYCKFGH-----AC-  
AAR84611.1 CLVCGDRASGYHYNALTCEGCKGFFRRSVTKN-----AVYCKFGH-----AC-  
AAM54494.1 CLVCGDRASGYHYNALTCEGCKGFFRRSVTKN-----AVYCKFGH-----AC-  
AAM54496.1 CLVCGDRASGYHYNALTCEGCKGFFRRSVTKN-----AVYCKFGH-----AC-  
ECR\_HELVI CLVCGDRASGYHYNALTCEGCKGFFRRSVTKN-----AVYCKFGH-----AC-  
ECR\_MANSE CLVCGDRASGYHYNALTCEGCKGFFRRSVTKN-----AVYCKFGH-----AC-  
AAB27699.1 CLVCGDRASGYHYNALTCEGCKGFFRRSVTKS-----AVYCKFGR-----AC-

XP\_320323.1 CLVCGDRASGYHYNALTCEGCKGFFRRSVTKN-----AVYCKFGH-----AC-  
AAB94565.1 CLVCGDRASGYHYNALTCEGCKGFFRRSITKN-----AVYQCKYGN-----NC-  
AAB94566.1 CLVCGDRASGYHYNALTCEGCKGFFRRSITKN-----AVYQCKYGN-----NC-  
AAB94567.1 CLVCGDRASGYHYNALTCEGCKGFFRRSITKN-----AVYQCKYGN-----NC-  
AAD19828.1 CLVCGDRASGYHYNALTCEGCKGFFRRSITKN-----AVYQCKYGN-----NC-  
CAA72296.1 CLVCGDRASGYHYNALTCEGCKGFFRRSITKN-----AVYQCKYGN-----NC-  
AAC33432.2 CLVCGDRASGYHYNALTCEGCKGFFRRSITKN-----AVYQCKYGN-----NC-  
AAH61668.1 CVVCGDKASGYHYNALTCEGCKGFFRRSITKN-----AVYRCKNGG-----HC-  
AAM33366.1 CVVCGDKASGYHYNALTCEGCKGFFRRSITKN-----AVYRCKNGG-----HC-  
AAM33367.1 CVVCGDKASGYHYNALTCEGCKGFFRRSITKN-----AVYRCKNGG-----HC-  
NP\_941060.1 CMVCGDKASGYHYNALTCEGCKGFFRRSITKN-----AVYSCKNGG-----HC-  
NP\_963913.1 CMVCGDKASGYHYNALTCEGCKGFFRRSITKN-----AVYSCKNGG-----HC-  
NP\_963914.1 CMVCGDKASGYHYNALTCEGCKGFFRRSITKN-----AVYSCKNGG-----HC-  
NP\_963915.1 CMVCGDKASGYHYNALTCEGCKGFFRRSITKN-----AVYSCKNGG-----HC-  
XP\_227528.2 CMVCGDKASGYHYNALTCEGCKGFFRRSITKN-----AVYSCKNGG-----HC-  
AAL57619.1 CVVCGDKASGYHYNALTCEGCKGFFRRSITKN-----AVYKCKNGG-----NC-  
NP\_989444.1 CVVCGDKASGYHYNALTCEGCKGFFRRSITKN-----AVYKCKNGG-----NC-  
AAM53546.1 CVVCGDRASGYHYNALTCEGCKGFFRRSITKN-----AVYKCKNGG-----SC-  
AAM53548.1 CVVCGDRASGYHYNALTCEGCKGFFRRSITKN-----AVYKCKNGG-----SC-  
AAM53550.1 CVVCGDRASGYHYNALTCEGCKGFFRRSITKN-----AVYKCKNGG-----NC-  
CAE11874.1 CVVCGDRASGYHYNALTCEGCKGFFRRSITKN-----AVYKCKNGG-----NC-  
NP\_005114.1 CVVCGDRASGYHYNALTCEGCKGFFRRSITKN-----AVYKCKNGG-----NC-  
NP\_068513.1 CVVCGDRASGYHYNALTCEGCKGFFRRSITKN-----AVYKCKNGG-----NC-  
AAM53547.1 CVVCGDRASGYHYNALTCEGCKGFFRRSITKN-----AVYKCKNGG-----SC-  
AAM53549.1 CVVCGDRASGYHYNALTCEGCKGFFRRSITKN-----AVYKCKNGG-----SC-  
AAM53551.1 CVVCGDRASGYHYNALTCEGCKGFFRRSITKN-----AVYKCKNGG-----NC-  
NRH4\_HUMAN CVVCGDRASGYHYNALTCEGCKGFFRRSITKN-----AVYKCKNGG-----NC-  
I49019 CVVCGDRASGYHYNALTCEGCKGFFRRSITKN-----AVYKCKNGG-----NC-  
NRH4\_MOUSE CVVCGDRASGYHYNALTCEGCKGFFRRSITKN-----AVYKCKNGG-----NC-  
I49020 CVVCGDRASGYHYNALTCEGCKGFFRRSITKN-----AVYKCKNGG-----NC-  
NP\_033134.1 CVVCGDRASGYHYNALTCEGCKGFFRRSITKN-----AVYKCKNGG-----NC-  
AAM18081.2 CVVCGDRASGYHYNALTCEGCKGFFRRSITKN-----AVYKCKNGG-----NC-  
AAA58594.1 CRVCGDKASGFHYNVLSCEGCKGFFRRSVVRGGA-----RRYACRGGG-----TC-  
NP\_009052.1 CRVCGDKASGFHYNVLSCEGCKGFFRRSVVRGGA-----RRYACRGGG-----TC-  
BAC36906.1 CRVCGDKASGFHYNVLSCEGCKGFFRRSVVHGGA-----GRYACRGSg-----TC-  
NP\_033499.1 CRVCGDKASGFHYNVLSCEGCKGFFRRSVVHGGA-----GRYACRGSg-----TC-  
NP\_113814.1 CRVCGDKASGFHYNVLSCEGCKGFFRRSVVHGGA-----GRYACRGSg-----TC-  
NRH2\_RAT CRVCGDKASGFHYNVLSCEGCKGFFRRSVVHGGA-----GRYACRGSg-----TC-  
AAD16050.1 CSVCGDKASGFHYNVLSCEGCKGFFRRSVIKG-----ARYVCHSGG-----HC-  
NP\_038867.1 CSVCGDKASGFHYNVLSCEGCKGFFRRSVIKG-----ARYVCHSGG-----HC-  
NP\_113815.1 CSVCGDKASGFHYNVLSCEGCKGFFRRSVIKG-----ARYVCHSGG-----HC-  
AAO12508.1 CSVCGDKASGFHYNVLSCEGCKGFFRRSVIKG-----ARYVCHSGG-----HC-  
AAH08819.1 CSVCGDKASGFHYNVLSCEGCKGFFRRSVIKG-----AHYVCHSGG-----HC-  
NRH3\_HUMAN CSVCGDKASGFHYNVLSCEGCKGFFRRSVIKG-----AHYVCHSGG-----HC-  
AAH41172.1 CSVCGDKASGFHYNVLSCEGCKGFFRRSVIKG-----AHYVCHSGG-----HC-  
NP\_005684.1 CSVCGDKASGFHYNVLSCEGCKGFFRRSVIKG-----AHYVCHSGG-----HC-  
AAO19584.1 CSVCGDKASGFHYNVLSCEGCKGFFRRSVIKG-----AHYVCHSGG-----HC-  
AAO19585.1 CSVCGDKASGFHYNVLSCEGCKGFFRRSVIKG-----AHYVCHSGG-----HC-  
AAO19595.1 CSVCGDKASGFHYNVLSCEGCKGFFRRSVIKG-----AHYVCHSGG-----HC-  
AAO19583.1 CSVCGDKASGFHYNVLSCEGCKGFFRRSVIKG-----ARYVCHSGG-----HC-  
AAO19586.1 CSVCGDKASGFHYNVLSCEGCKGFFRRSVIKG-----ARYVCHSGG-----HC-  
AAO19587.1 CSVCGDKASGFHYNVLSCEGCKGFFRRSVIKG-----ARYVCHSGG-----HC-  
AAO19588.1 CSVCGDKASGFHYNVLSCEGCKGFFRRSVIKG-----ARYVCHSGG-----HC-  
AAO19590.1 CSVCGDKASGFHYNVLSCEGCKGFFRRSVIKG-----ARYVCHSGG-----HC-  
AAO19591.1 CSVCGDKASGFHYNVLSCEGCKGFFRRSVIKG-----ARYVCHSGG-----HC-  
AAO19592.1 CSVCGDKASGFHYNVLSCEGCKGFFRRSVIKG-----ARYVCHSGG-----HC-  
AAO19594.1 CSVCGDKASGFHYNVLSCEGCKGFFRRSVIKG-----ARYVCHSGG-----HC-

CAD45182.1 CSVCGDKASGFHYNVLSCEGCKGFFRRSVIKG-----AQYVCKNGG-----KC-  
NP\_989873.1 CSVCGDKASGFHYNVLSCEGCKGFFRRSVIKG-----AQYVCKNGG-----KC-  
AAO19593.1 CSVCGDKASGFHYNVLSCEGCKGFFRRSVIKG-----ARYVCHGGG-----HC-  
1KB2 CGVCGDRATGFHFNAMTCEGCKGFFRRSMKRKA-----LFT-CPFNG-----DCR  
AAK48863.1 CGVCGDRATGFHFNAMTCEGCKGFFRRSMKRKA-----LFT-CPFNG-----DCR  
VDR\_BOVIN CGVCGDRATGFHFNAMTCEGCKGFFRRSMKRKA-----LFT-CPFNG-----DCR  
NP\_000367.1 CGVCGDRATGFHFNAMTCEGCKGFFRRSMKRKA-----LFT-CPFNG-----DCR  
NP\_033530.2 CGVCGDRATGFHFNAMTCEGCKGFFRRSMKRKA-----LFT-CPFNG-----DCR  
VDR\_MOUSE CGVCGDRATGFHFNAMTCEGCKGFFRRSMKRKA-----LFT-CPFNG-----DCR  
NP\_058754.1 CGVCGDRATGFHFNAMTCEGCKGFFRRSMKRKA-----LFT-CPFNG-----DCR  
NP\_990429.1 CGVCGDRATGFHFNAMTCEGCKGFFRRSMKRKA-----MFT-CPFNG-----DCK  
VDR\_COTJA CGVCGDRATGFHFNAMTCEGCKGFFRRSMKRKA-----MFT-CPFNG-----DCK  
VDR\_XENLA CGVCGDKATGFHFNAMTCEGCKGFFRRSMKRKA-----MFT-CPFNG-----DCR  
A60912 CGVCGDRATGFHFNAMTCEGCKGFFRRSMKRKA-----MFT-CPFNG-----DCK  
JC7229 CGVCGDKATGFHFNAMTCEGCKGFFRRSMKRKA-----SFT-CPFNG-----SCT  
NP\_570994.1 CGVCGDKATGFHFNAMTCEGCKGFFRRSMKRKA-----SFT-CPFNG-----NCT  
JC7230 CGVCGDKATGFHFNAMTCEGCKGFFRRSMKRKA-----TFT-CPFNG-----SCT  
AAA61274.1 CGVCGDRATGFHFNAMTCEGCKGFFRRSMKRKA-----LFT-CPFNG-----DCR  
AAP05810.1 CGVCGDKATGYHFNAMTCEGCKGFFRRSMKRKA-----SFT-CPFNG-----KCN  
CAB55489.1 CRVCGDKATGYHFNVMTCEGCKGFFRRAMKRNA-----RLR-CPFRKG-----ACE  
CAB55490.1 CRVCGDKATGYHFNVMTCEGCKGFFRRAMKRNA-----RLR-CPFRKG-----ACE  
CAB55492.1 CRVCGDKATGYHFNVMTCEGCKGFFRRAMKRNA-----RLR-CPFRKG-----ACE  
CAB55493.1 CRVCGDKATGYHFNVMTCEGCKGFFRRAMKRNA-----RLR-CPFRKG-----ACE  
NP\_003880.3 CRVCGDKATGYHFNVMTCEGCKGFFRRAMKRNA-----RLR-CPFRKG-----ACE  
NP\_148934.1 CRVCGDKATGYHFNVMTCEGCKGFFRRAMKRNA-----RLR-CPFRKG-----ACE  
NP\_071285.1 CRVCGDKATGYHFNVMTCEGCKGFFRRAMKRNA-----RLR-CPFRKG-----ACE  
AAM10633.1 CRVCGDKATGYHFNVMTCEGCKGFFRRAMKRNA-----RLR-CPFRKG-----ACE  
NP\_035066.1 CRVCGDKANGYHFNVMTCEGCKGFFRRAMKRV-----RLR-CPFRKG-----TCE  
NP\_443212.1 CRVCGDKANGYHFNVMTCEGCKGFFRRAMKRV-----RLR-CPFRKG-----TCE  
BAB27404.1 CRVCGDKANGYHFNVMTCEGCKGFFRRAMKRV-----RLR-CPFRKG-----TCE  
AAD54426.1 CRVCGDKANGYHFNVLTCEGCKGFFRRTVKRNA-----RLR-CPFRKG-----ACE  
AAH41187.1 CRACGDRATGYHFNAMTCEGCKGFFRRAMKRNL-----RLS-CPFQ-----SCV  
S41497 CRACGDRATGYHFNAMTCEGCKGFFRRAMKRNL-----RLS-CPFQ-----SCV  
JC7510 CRACGDRATGYHFNAMTCEGCKGFFRRAMKRNL-----RLS-CPFQ-----SCV  
AAC53350.1 CVVCGDRATGYHFHALTCEGCKGFFRRTVSKTI-----GPI-CPFAG-----RCE  
NP\_033933.1 CVVCGDRATGYHFHALTCEGCKGFFRRTVSKTI-----GPI-CPFAG-----RCE  
BAC84956.1 CVVCGDRATGYHFHALTCEGCKGFFRRTVSKTI-----GPI-CPFAG-----RCE  
NP\_075230.1 CVVCGDRATGYHFHALTCEGCKGFFRRTVSKTI-----GPI-CPFAG-----RCE  
AAM76230.1 CVVCGDQATGYHFHALTCEGCKGFFRRTVSKSI-----GPT-CPFAG-----SCE  
NP\_005113.1 CVVCGDQATGYHFHALTCEGCKGFFRRTVSKSI-----GPT-CPFAG-----SCE  
BAD00038.1 CMVCGDRATGYHFHALTCEGCKGFFRRTVSKNT-----GLT-CPFAG-----SCK  
BAD00039.1 CMVCGDRATGYHFHALTCEGCKGFFRRTVSKNT-----GLT-CPFAG-----NCK  
NP\_990033.1 CAVCGDRATGYHFHVMSCGCKGFFRRSILKGV-----HFT-CPFTR-----SCP  
AAP31437.1 CTVCSDRANGYNFGVLTCEESKAFFRRNASKHK-----EIK-CPFSD-----SCQ  
NP\_741445.1 CTVCSDRANGYNFGVLTCEESKAFFRRNASKHK-----EIK-CPFSD-----SCQ  
CAE61946.1 CTVCCDRANGYNFGVLTCEESKAFFRRNAAKHK-----DIK-CPFSD-----SCQ  
NP\_509782.1 CRVCGDHATGYNFNVTCEESKAFFRRNALRPK-----EFK-CPYSE-----DCE  
NP\_509784.1 CRVCGDHATGYNFNVTCEESKAFFRRNALRPK-----EFK-CPYSE-----DCE  
T20733 CRVCGDHATGYNFNVTCEESKAFFRRNALRPK-----EFK-CPYSE-----DCE  
CAE60812.1 CRVCGDHATGYNFNVTCEESKAFFRRNALRPK-----EFK-CPYSE-----DCE  
CAE63355.1 CRVCGDKAFSYNFNVTCEESKAFFRRNANKEK-----EIR-CPFNE-----QCE  
NH48\_CAEEEL CRVCGDKAFSYNFNVTCEESKAFFRRNANKEK-----EIR-CPFNE-----QCE  
NP\_741940.1 CRVCGDKAFSYNFNVTCEESKAFFRRNANKEK-----EIR-CPFNE-----QCE  
NP\_524493.1 CAVCGDKALGYNFNAVTCEESKAFFRRNALAKK-----QFT-CPFNQ-----NCD  
XP\_313130.1 CSVCGDKALGYNFNAVTCEESKAFFRRNALSTK-----GFT-CPFNE-----NCD  
AAP21572.1 CKVCGEPAAGFHFGAFTCEGCKSFFGRSYNNIS-----TIS-ECKNDG-----KCI  
KNIR\_DROVI CKVCGEPAAGFHFGAFTCEGCKSFFGRSYNNIS-----TIS-ECKNDG-----KCI

AAP12718.1 CKVCGEPAAGFHFGAFTCEGCKSFFGRSYNNIS-----TIS-ECKNDG-----KCI  
NP\_524187.1 CKVCGEPAAGFHFGAFTCEGCKSFFGRSYNNIS-----TIS-ECKNEG-----KCI  
S01919 CKVCGEPAAGFHFGAFTCEGCKSFFGRSYNNIS-----TIS-ECKNEG-----KCI  
CAF21851.1 CKVCGEPAAGFHFGAFTCEGCKSFFGRTYNNIS-----SIS-ECKNNG-----ECV  
NP\_788552.1 CKVCGEPAAGFHFGAFTCEGCKSFFGRSYNNLS-----SIS-DCKNNG-----ECI  
EGON\_DROME CKVCGEPAAGFHFGAFTCEGCKSFFGRTYNNIA-----AIA-GCKHNG-----DCV  
NP\_524206.1 CKVCGEPAAGFHFGAFTCEGCKSFFGRTYNNIA-----AIA-GCKHNG-----DCV  
AAG15123.1 CSVCGEAGDGAHFGAEACRACAAFFRRSVALNK-----AYV-CRAMGT-----CV  
NP\_510659.1 CSVCGEAGDGAHFGAEACRACAAFFRRSVALNK-----AYV-CRAMGT-----CV  
T19202 CSVCGEAGDGAHFGAEACRACAAFFRRSVALNK-----AYV-CRAMGT-----CV  
CAE69977.1 CSVCGEAGDGAHFGAEACRACAAFFRRSVALNK-----AYV-CRAMGA-----CI  
AAG15170.1 CSICGEVGNVHFGAEACRACAAFFRRSVALNK-----LYR-CRGDGN-----CD  
NP\_507636.1 CSICGEVGNVHFGAEACRACAAFFRRSVALNK-----LYR-CRGDGN-----CD  
AAG15171.1 CSICGEVGNVHFGAEACRACAAFFRRSVALNK-----LYR-CRGDGN-----CD  
AAG15172.1 CSICGEVGNVHFGAEACRACAAFFRRSVALNK-----LYR-CRGDGN-----CD  
CAE73281.1 CSVCGEVNGIHFHFGAEACRACAAFFRRSVALHK-----EYR-CRGMGN-----CD  
AAG15175.1 CSICREDGDGYHFGAEACRACAAFFRRSVSLDK-----TYL-CRGNND-----CE  
AAG15176.1 CSICREDGDGYHFGAEACRACAAFFRRSVSLDK-----TYL-CRGNND-----CE  
AAG15177.1 CSICREDGDGYHFGAEACRACAAFFRRSVSLDK-----TYL-CRGNND-----CE  
NP\_503561.2 CSICREDGDGYHFGAEACRACAAFFRRSVSLDK-----TYL-CRGNND-----CE  
CAE66792.1 CAVCREEGDGFHFGAEACRACAAFFRRSVSLDK-----RYL-CRGNND-----CD  
G88124 CSICREPGDGFHFGAEACRACAAFFRRRTVSNRK-----TYS-CQGND-----CD  
NP\_494785.1 CAICQESAEGFHFGAEACRACAAFFRRRTVSNRK-----TYS-CQGND-----CD  
NP\_494784.1 CSICREPGDGFHFGAEACRACAAFFRRSVSQQSK-----TYL-CQGND-----CD  
F88124 CSICQESGDGFHFGAEACRACAAFFRRRSISENK-----LYT-CSGNND-----CD  
CAE60139.1 CAICLEDGDGFHFGAEACKACAAFFRRRSISQTK-----RYV-CRNGD-----CD  
NP\_505589.1 CAVCNEVGDGLHFGAEACRACAAFFRRSVALSK-----KYE-CRAGR-----CE  
AAG15147.1 CLICCEVADGHHFGAAACRACAAFFRRRTVQLNK-----VHD-CPKNGQ-----CF  
AAG15148.1 CLICCEVADGHHFGAAACRACAAFFRRRTVQLNK-----VHD-CPKNGQ-----CF  
NP\_741644.1 CLICCEVADGHHFGAAACRACAAFFRRRTVQLNK-----VHD-CPKNGQ-----CF  
CAE61044.1 CLICCEVADGHHFGAPACRACAAFFRRRTVQLNK-----IHE-CPKNNQ-----CF  
CAE64011.1 CAVCHEVGDGLHFGAEACRACAAFFRRRTVALGK-----EYE-CRQHGN-----CT  
NP\_505588.1 CAICGDVGDGHHFGLDACRACAAFFRRRTVALGK-----KFE-CRQQA-----CK  
AAG15132.1 CLICGDSADSLHFGALSCRACAAFFRRKVA-GR-----RNI-FRRCDRQ-----CK  
NP\_504771.1 CLICGDSADSLHFGALSCRACAAFFRRKVA-GR-----RNI-FRRCDRQ-----CK  
CAE71986.1 CLICGDSADSLHFGALSCRACAAFFRRKVA-GR-----RNI-FRRCDRQ-----CQ  
CAE58238.1 CGVCGEPADSVHFGAHSRACAAFFRRRVVSGK-----LNPKCRCAGR-----CN  
NP\_503460.1 CRVCGECADAVHFGALSCRACAAFFRRKVAAGK-----PLSSSRCSGS-----CK  
CAE65524.1 CGVCSDTADAVHFGGLSCRACAAFFRRKVAAGK-----MSIGRRCFGN-----CK  
CAE64776.1 CKICCEPAHG VHFVASCACAAFFRRRTTVL GK-----KYS-CRLKNE-----QCT  
NP\_505639.1 CKICCEPAHG VHFVASCACAAFFRRRTTVL GK-----KYT-CRQKNE-----KCT  
AA039179.1 CKVCGDTGNGMHFGAFTCRACAAFFRRAASR-----KFLR-----KCE  
NP\_507680.1 CKVCGDTGNGMHFGAFTCRACAAFFRRAASR-----KFLR-----KCE  
CAE17952.1 CKVCGDTGNGMHFGAFTCRACAAFFRRAASR-----KFLR-----KCE  
CAE56100.1 CSVCPPEPGNGMHFGAYTCRACAAFFRRAAPR-----NSSK-----KCK  
NP\_503608.2 CEVCGDKTSGRHFGVMSCRACAAFFRRAATW-----NLEKRICPNG-----TCH  
T43356 CEVCGDKTSGRHFGVMSCRACAAFFRRAATW-----NLEKRICPNG-----TCH  
T31792 CEVCGDKTSGRHFGVMSCRACAAFFRRAATW-----NLEKRICPNG-----TCH  
CAE74995.1 CLVCEEPANGKHFGAITCRACAAFFRRVAPKP-----QAIRPCKFKN-----RCK  
NP\_503455.1 CRICFEKGHGYHFGVFSRACAAFFRRCHFLKE-----NRRRCRLSKG-----KCG  
CAE74767.1 CSICSDKAEGYHFGAISCAACGAFFRRSVSDQK-----VYSCSNRQCN-----ITH  
NP\_501728.1 CSICSDKAEGYHFGAISCAACGAFFRRSVSDQK-----VYSCSNRQCS-----IVH  
NP\_510119.1 CKVCNEKTTGFNYGVQSCNACKMFFRRALDTPK-----VLK-CGRDGN-----CPT  
CAE67969.1 CQVCYDSSAGTHFGVQVCSACTAFFRRRTVAKNH-----KYR-CKGNNT-----CE  
A42128 CPVCGDKVSGYHYGLLTCECCKGFFKRTVQNNK-----HYT-CTE-----SQSCK  
AAB28339.1 CPVCGDKVSGYHYGLLTCECCKGFFKRTVQNNK-----HYT-CTE-----SQSCK  
NP\_620639.1 CPVCGDKVSGYHYGLLTCECCKGFFKRTVQNNK-----HYT-CTE-----SQSCK

NP\_776828.1 CPVCGDKVSGYHYGLLLTCECKGFFKRTVQNNK-----HYT-CTE-----SQSCK  
AAG24622.1 CPVCGDKVSGYHYGLLLTCECKGFFKRTVQNNK-----HYT-CTE-----SQSCK  
STF1\_MOUSE CPVCGDKVSGYHYGLLLTCECKGFFKRTVQNNK-----HYT-CTE-----SQSCK  
NP\_004950.2 CPVCGDKVSGYHYGLLLTCECKGFFKRTVQNNK-----HYT-CTE-----SQSCK  
NP\_445796.1 CPVCGDKVSGYHYGLLLTCECKGFFKRTVQNNK-----HYT-CTE-----SQSCK  
BAA19127.1 CPVCGDKVSGYHYGLLLTCECKGFFKRTVQNNK-----HYT-CTE-----SQSCK  
AAG35648.1 CPVCGDKVSGYHYGLLLTCECKGFFKRTVQNNK-----HYT-CTE-----SQSCK  
STF1\_PIG CPVCGDKVSGYHYGLLLTCECKGFFKRTVQNNK-----HYT-CTE-----SQSCK  
JC4972 CPVCGDKVSGYHYGLLLTCECKGFFKRTVQNNK-----HYT-CTE-----SQSCK  
AAD01975.1 CPVCGDKVSGYHYGLLLTCECKGFFKRTVQNNK-----HYT-CTE-----SQNSK  
AAK94918.1 CPVCGDKVSGYHYGLLLTCECKGFFKRTVQNNK-----HYT-CTE-----SQNSK  
BAA76713.1 CPVCGDKVSGYHYGLLLTCECKGFFKRTVQNNK-----HYT-CTE-----SQNSK  
NP\_990408.1 CPVCGDKVSGYHYGLLLTCECKGFFKRTVQNNK-----HYT-CTE-----SQNSK  
AAK97659.1 CPVCGDKVSGYHYGLLLTCECKGFFKRTVQNNK-----HYT-CTE-----SQSCK  
AAM89250.1 CPVCGDKVSGYHYGLLLTCECKGFFKRTVQNNK-----RYT-CAE-----SQDCK  
AAO59489.1 CPVCGDKVSGYHYGLLLTCECKGFFKRTVQNNK-----RYT-CAE-----SQDCK  
BAA25269.1 CPVCGDKVSGYHYGLLLTCECKGFFKRTVQNNK-----RYT-CAE-----NQDCK  
BAA32394.1 CPVCGDKVSGYHYGLLLTCECKGFFKRTVQNNK-----RYT-CAE-----NQECK  
BAC75890.1 CPVCGDKVSGYHYGLLLTCECKGFFKRTVQNNK-----RYT-CAE-----NQECK  
AAS47030.1 CPVCGDKVSGYHYGLLLTCECKGFFKRTVQNNK-----RYT-CTE-----NQTCCK  
BAA36789.1 CPVCGDKVSGYHYGLLLTCECKGFFKRTVQNNK-----RYT-CTE-----NQSCK  
AAG49004.1 CPVCGDKVSGYHYGLLLTCECKGFFKRTVQNNK-----RYT-CNQ-----NQDCG  
AAG49005.1 CPVCGDKVSGYHYGLLLTCECKGFFKRTVQNNK-----RYT-CNQ-----NQDCG  
NP\_571869.1 CPVCGDKVSGYHYGLLLTCECKGFFKRTVQNNK-----RYT-CTQ-----NQDCG  
A56543 CPVCGDKVSGYHYGLLLTCECKGFFKRTVQNNK-----RYT-CIE-----NQSCP  
AAA64285.1 CPVCGDKVSGYHYGLLLTCECKGFFKRTVQNNK-----RYT-CIE-----NQSCP  
AAA18357.1 CPVCGDKVSGYHYGLLLTCECKGFFKRTVQNNK-----RYT-CIE-----NQSCQ  
AAO21918.1 CPVCGDKVSGYHYGLLLTCECKGFFKRTVQNNK-----RYT-CIE-----NQSCQ  
AAK54449.1 CPVCGDKVSGYHYGLLLTCECKGFFKRTVQNNK-----RYT-CIE-----NQSCQ  
NP\_571538.1 CPVCGDKVSGYHYGLLLTCECKGFFKRTVQNNK-----RYT-CIE-----NQSCQ  
AAD03155.1 CPVCGDKVSGYHYGLLLTCECKGFFKRTVQNNK-----RYT-CIE-----NQNCQ  
AAD03248.1 CPVCGDKVSGYHYGLLLTCECKGFFKRTVQNNK-----RYT-CIE-----NQNCQ  
AAG35649.1 CPVCGDKVSGYHYGLLLTCECKGFFKRTVQNNK-----RYT-CIE-----NQNCQ  
BAA34092.1 CPVCGDKVSGYHYGLLLTCECKGFFKRTVQNNK-----RYT-CIE-----NQNCQ  
NP\_990409.1 CPVCGDKVSGYHYGLLLTCECKGFFKRTVQNNK-----RYT-CIE-----NQNCQ  
NP\_995582.1 CPVCGDKVSGYHYGLLLTCECKGFFKRTVQNNK-----RYT-CIE-----NQNCQ  
NP\_003813.1 CPVCGDKVSGYHYGLLLTCECKGFFKRTVQNNK-----RYT-CIE-----NQNCQ  
BAA94077.1 CPVCGDKVSGYHYGLLLTCECKGFFKRTVQNNK-----RYT-CIE-----NQTCQ  
BAA94078.1 CPVCGDKVSGYHYGLLLTCECKGFFKRTVQNNK-----RYT-CIE-----NQTCQ  
AAC52645.1 CPVCGDKVSGYHYGLLLTCECKGFFKRTVQNNK-----RYT-CIE-----NQNCQ  
BAA36340.1 CPVCGDKVSGYHYGLLLTCECKGFFKRTVQNNK-----RYT-CIE-----NQNCQ  
NP\_109601.1 CPVCGDKVSGYHYGLLLTCECKGFFKRTVQNNK-----RYT-CIE-----NQNCQ  
NP\_068510.1 CPVCGDKVSGYHYGLLLTCECKGFFKRTVQNNK-----RYT-CIE-----NQNCQ  
AAQ72771.1 CPVCGDKVSGYHYGLLLTCECKGFFKRTVQNNK-----KYI-CAE-----KQDCR  
T01791 CPVCGDKVSGYHYGLLLTCECKGFFKRTVQNNK-----HYT-CTE-----SQSCK  
BAB18653.1 CPVCGDKVSGYHYGLLLTCECKGFFKRTVQNNK-----HYT-CTE-----SQSCK  
NP\_524143.2 CPVCGDKVSGYHYGLLLTCECKGFFKRTVQNNK-----VYT-CVA-----ERSCH  
NP\_730359.1 CPVCGDKVSGYHYGLLLTCECKGFFKRTVQNNK-----VYT-CVA-----ERSCH  
T13733 CPVCGDKVSGYHYGLLLTCECKGFFKRTVQNNK-----VYT-CVA-----ERSCH  
AAA28915.1 CPVCGDKVSGYHYGLLLTCECKGFFKRTVQNNK-----VYT-CVA-----ERSCH  
AAF82307.1 CPVCGDKVSGYHYGLLLTCECKGFFKRTVQNNK-----VYT-CVA-----ERQCH  
XP\_315680.1 CPVCGDKVSGYHYGLLLTCECKGFFKRTVQNNK-----VYT-CVA-----ERQCH  
AAL50351.1 CPVCGDKVSGYHYGLLLTCECKGFFKRTVQNNK-----VYT-CVA-----ERACH  
FTF1\_BOMMO CPVCGDKVSGYHYGLLLTCECKGFFKRTVQNNK-----VYT-CVA-----ERACH  
BAA01745.1 CPVCGDKVSGYHYGLLLTCECKGFFKRTVQNNK-----VYT-CVA-----ERACH  
AAD41899.1 CPVCGDKVSGYHYGLLLTCECKGFFKRTVQNNK-----VYT-CVA-----DRSCQ  
XP\_315681.1 CPVCGDKVSGYHYGLLLTCECKGFFKRTVQNNK-----VYT-CVA-----ERQCH

AAF67038.1 CPVCGDRVSGYHYGLLLTCE SCKGFFKRTVQNKK-----QYQ-CSA-----EANCH  
AAF67040.1 CPVCGDRVSGYHYGLLLTCE SCKGFFKRTVQNKK-----QYQ-CSA-----EANCH  
NH25\_CAEEL CPVCGDRVSGYHYGLLLTCE SCKGFFKRTVQNKK-----QYQ-CSA-----EANCH  
CAE70358.1 CPVCGDRVSGYHYGLLLTCE SCKGFFKRTVQNKK-----QYQ-CSA-----DANCH  
AAK19303.1 CPVCGDRVSGYHYGLLLTCE SCKGFFKRSVQNNK-----RYT-CAE-----AQNCP  
FTFB\_DROME CPICGDKISGFHYGIFSCESCKGFFKRTVQNRK-----NYV-CVR-----GGPCQ  
NP\_476932.1 CPICGDKISGFHYGIFSCESCKGFFKRTVQNRK-----NYV-CVR-----GGPCQ  
NP\_476933.1 CPICGDKISGFHYGIFSCESCKGFFKRTVQNRK-----NYV-CVR-----GGPCQ  
AAA28543.1 CPICGDKISGFHYGIFSCESCKGFFKRTVQNRK-----NYV-CVR-----GGPCQ  
S33708 CPICGDKISGFHYFIFSCESCKGFFKRTVQNRK-----NYV-CVR-----GGPCQ  
S33709 CPICGDKISGFHYFIFSCESCKGFFKRTVQNRK-----NYV-CVR-----GGPCQ  
XP\_310077.1 CPICGDKISGFHYGIFSCESCKGFFKRTVQNRK-----NYV-CLR-----GAACP  
BAA34123.1 CPICGDKISGFHYGIFSCESCKGFFKRTVQNRK-----NYM-CLR-----GNCP  
AAG49449.1 CPICGDKISGYHYGIFCCESCKGFFKRTVQNAK-----RYA-CHRPNA-----SSRCE  
AAG29619.1 CLVCGDIASGYHYGVASCEACKAFFKRTIQGNI-----EYS-CPATN-----EC-  
NP\_004443.2 CLVCGDIASGYHYGVASCEACKAFFKRTIQGNI-----EYS-CPATN-----EC-  
ERR2\_RAT CLVCGDIASGYHYGVASCEACKAFFKRTIQGNI-----EYS-CPATN-----EC-  
AAH44858.1 CLVCGDIASGYHYGVASCEACKAFFKRTIQGNI-----EYN-CPATN-----EC-  
NP\_036064.2 CLVCGDIASGYHYGVASCEACKAFFKRTIQGNI-----EYN-CPATN-----EC-  
BAC27656.1 CLVCGDIASGYHYGVASCEACKAFFKRTIQGNI-----EYN-CPATN-----EC-  
ERR2\_MOUSE CLVCGDIASGYHYGVASCEACKAFFKRTIQGNI-----EYN-CPATN-----EC-  
1LO1 CLVCGDIASGYHYGVASCEACKAFFKRTIQGNI-----EYS-CPATN-----EC-  
AAS66635.1 CLVCGDIASGYHYGVASCEACKAFFKRTIQGNI-----EYS-CPATN-----EC-  
AAH08218.1 CLVCGDIASGYHYGVASCEACKAFFKRTIQGNI-----EYS-CPATN-----EC-  
NP\_976081.1 CLVCGDIASGYHYGVASCEACKAFFKRTIQGNI-----EYS-CPATN-----EC-  
AAH64700.1 CLVCGDIASGYHYGVASCEACKAFFKRTIQGNI-----EYS-CPATN-----EC-  
NP\_036065.1 CLVCGDIASGYHYGVASCEACKAFFKRTIQGNI-----EYS-CPATN-----EC-  
BAA74855.2 CLVCGDIASGYHYGVASCEACKAFFKRTIQGNI-----EYS-CPATN-----EC-  
AAQ93376.1 CLVCGDIASGYHYGVASCEACKAFFKRTIQGNI-----EYS-CPATN-----EC-  
BAC41450.1 CLVCGDIASGYHYGVASCEACKAFFNRTIQGNI-----EYS-CPATN-----EC-  
AAS66636.1 CLVCGDIASGYHYGVASCEACKAFFKRTIQGNI-----EYS-CPATN-----EC-  
AAB17015.1 CLVCGDVASGYHYGVASCEACKAFFKRTIQGSI-----EYS-CPASN-----EC-  
AAH63795.1 CLVCGDVASGYHYGVASCEACKAFFKRTIQGSI-----EYS-CPASN-----EC-  
ERR1\_HUMAN CLVCGDVASGYHYGVASCEACKAFFKRTIQGSI-----EYS-CPASN-----EC-  
ERR1\_MOUSE CLVCGDVASGYHYGVASCEACKAFFKRTIQGSI-----EYS-CPASN-----EC-  
A29345 CLVCGDVASGYHYGVASCEACKAFFKRTIQGSI-----EYS-CPASN-----EC-  
XP\_215174.2 CLVCGDVASGYHYGVASCEACKAFFKRTIQGSI-----EYS-CPASN-----EC-  
NP\_004442.3 CLVCGDVASGYHYGVASCEACKAFFKRTIQGSI-----EYS-CPASN-----EC-  
NP\_031979.1 CLVCGDVASGYHYGVASCEACKAFFKRTIQGSI-----EYS-CPASN-----EC-  
AAS20260.1 CLVCGDVASGYHYGVASCEACKAFFKRTIQGSI-----EYS-CPASN-----EC-  
AAS66634.1 CLVCGDVASGYHYGVASCEACKAFFKRTIQGNI-----EYS-CPASN-----EC-  
AAS66637.1 CLVCGDFASGYHYGVASCEACKAFFKRTIQGNI-----EYS-CPVFN-----DC-  
NP\_648183.3 CLVCGDVASGFHYGVASCEACKAFFKRTIQGNI-----EYT-CPANN-----EC-  
NP\_729340.1 CLVCGDVASGFHYGVASCEACKAFFKRTIQGNI-----EYT-CPANN-----EC-  
XP\_321343.1 CLVCGDVASGFHYGVASCEACKAFFKRTIQGNI-----EYT-CPASN-----DC-  
AAK01303.1 CLVCSDEASGCHYGVLTCGSCKVFFKRAVEG-----QHNYLCAGRND-----C-  
AAP48589.1 CLVCSDEASGCHYGVLTCGSCKVFFKRAVEG-----QHNYLCAGRND-----C-  
GCR\_SAGOE CLVCSDEASGCHYGVLTCGSCKVFFKRAVEG-----QHNYLCAGRND-----C-  
GCR\_SAIBB CLVCSDEASGCHYGVLTCGSCKVFFKRAVEG-----QHNYLCAGRND-----C-  
GCR\_AOTNA CLVCSDEASGCHYGVLTCGSCKVFFKRAVEG-----QHNYLCAGRND-----C-  
GCR\_SAISC CLVCSDEASGCHYGVLTCGSCKVFFKRAVEG-----QHNYLCAGRND-----C-  
1802363A CLVCSDEASGCHYGVLTCGSCKVFFKRAVEGR-----QHNYLCAGRND-----C-  
AAC34207.1 CLVCSDEASGCHYGVLTCGSCKVFFKRAVEG-----QHNYLCAGRND-----C-  
QRHUGB CLVCSDEASGCHYGVLTCGSCKVFFKRAVEG-----QHNYLCAGRND-----C-  
NP\_000167.1 CLVCSDEASGCHYGVLTCGSCKVFFKRAVEG-----QHNYLCAGRND-----C-  
CAE45716.1 CLVCSDEASGCHYGVLTCGSCKVFFKRAVEG-----QHNYLCAGRND-----C-  
AAA16603.1 CLVCSDEASGCHYGVLTCGSCKVFFKRAVEGR-----QHNYLCAGRND-----C-

AAF66595.1 CLVCSDEASGCHYGVLTCGSCKVFFKRAVEG-----QHNYLCAGRND-----C-  
GCR\_PIG CLVCSDEASGCHYGVLTCGSCKVFFKRAVEG-----QHNYLCAGRND-----C-  
CAC10271.1 CLVCSDEASGCHYGVLTCGSCKVFFKRAVEG-----QHNYLCAGRND-----C-  
GCR\_TUPGB CLVCSDEASGCHYGVLTCGSCKVFFKRAVEG-----QHNYLCAGRND-----C-  
AAO85271.2 CLVCSDEASGCHYGVLTCGSCKVFFKRAVEG-----QHNYLCAGRND-----C-  
GCR\_RABIT CLVCSDEASGCHYGVLTCGSCKVFFKRAVKG-----QHNYLCAGRND-----C-  
1R4R CLVCSDEASGCHYGVLTCGSCKVFFKRAVEG-----QHNYLCAGRND-----C-  
A54273 CLVCSDEASGCHYGVLTCGSCKVFFKRAVEG-----QHNYLCAGRND-----C-  
GCR\_CAVPO CLVCSDELSGCHYGVLTCGSCKVFFKRAVEG-----QHNYLCAGRND-----C-  
AAB07866.1 CLVCSDEASGCHYGVLTCGSCKVFFKRAVEG-----QHNYLCAGRND-----C-  
NP\_036708.1 CLVCSDEASGCHYGVLTCGSCKVFFKRAVEG-----QHNYLCAGRND-----C-  
AAL66772.2 CLVCSDEASGCHYGVLTCGSCKVFFKRAVEG-----QHNYLCAGRND-----C-  
AAL78956.1 CLVCSDEASGCHYGVLTCGSCKVFFKRAVEG-----QHNYLCAGRND-----C-  
GCR\_RAT CLVCSDEASGCHYGVLTCGSCKVFFKRAVEG-----QHNYLCAGRND-----C-  
CAA72938.1 CLVCSDEASGCHYGVLTCGSCKVFFKRAVEG-----QHNYLCAGRND-----C-  
CAA31738.1 CLVCSDEASGCHYGVLTCGSCKVFFKRAVEG-----QHNYLCAGRND-----C-  
NP\_032199.1 CLVCSDEASVCHYGVLTCGSCKVFFKRAVEG-----QHNYLCAGRND-----C-  
CAA31739.1 CLVCSDEASGCHYGVLTCGSCKVFFKRAVEGR-----QHNYLCAGRND-----C-  
1R4O CLVCSDEASGCHYGVLTCGSCKVFFKRAVEG-----QHNYLCAGRND-----C-  
GCR\_XENLA CLVCSDEASGCHYGVLTCGSCKVFFKRAVEG-----QHNYLCAGRND-----C-  
S44047 CLVCSDEASGCHYGVLTCGSCKVFFKRAVEG-----QHNYLCAGRND-----C-  
CAA68545.1 CLVCSDEASGCHYGVLTCGSCKVFFKRAVEG-----QHNYLCAGRND-----C-  
1GLU CLVCSDEASGCHYGVLTCGSCKVFFKRAVEG-----QHNYLCAGRND-----C-  
GCR\_ONCMY CLVCSDEASGCHYGVLTCGSCKVFFKRAVEGWRRARQNTDGQHNYLCAGRND-----C-  
AAS48459.1 CLVCSDEASGCHYGVTTCGSCKVFFKRAVEGWRRARQNTDGQHNYLCAGRND-----C-  
GCR\_PAROL CLVCSDEASGCHYGVTTCGSCKVFFKRAVEGWRRARQNTDGQHNYLCAGRND-----C-  
AAM27889.1 CLVCSDEASGCHYGVTTCGSCKVFFKRAVEGWRRARQNTDGQHNYLCAGRND-----C-  
AAM27888.1 CLVCSDEASGCHYGVTTCGSCKVFFKRAVEG-----QHNYLCAGRND-----C-  
1RGD CLVCSDEASGCHYGVLTCGSCKVFFKRAVEG-----QHNYLCAGRND-----C-  
1GDC CLVCSDEASGCHYGVLTCGSCKVFFKRAVEG-----QHNYLCAGRND-----C-  
AAR87479.1 CLVCSDEASGCHYGVLTCGSCKVFFKRAVEGTGAR----GQHNYLCAGRND-----C-  
AAM27887.1 CLVCSDEASGCHYGVLTCGSCKVFFKRAVEG-----QHNYLCAGRND-----C-  
AAK20930.1 CLICGDEASGCHYGVLTCGSCKVFFKRAVEG-----QHNYLCAGRND-----C-  
AAA75575.1 CLVCGDEASGCHYGVTTCGSCKVFFKRAVEGKCSR----QHSYLCAGRND-----C-  
MCR\_XENLA CLVCGDEASGCHYGVTTCGSCKVFFKRAVEGKCSR----QHSYLCAGRND-----C-  
AAB35738.1 CLVCGDEASGCHYGVTTCGSCKVFFKRAVEGKCSW----QHNYLCAGRND-----C-  
AAC63513.1 CLVCGDEASGCHYGVTTCGSCKVFFKRAVEG-----QHNYLCAGRND-----C-  
NP\_000892.1 CLVCGDEASGCHYGVTTCGSCKVFFKRAVEG-----QHNYLCAGRND-----C-  
AAP48590.1 CLVCGDEASGCHYGVTTCGSCKVFFKRAVEG-----QHNYLCAGRND-----C-  
AAP48591.1 CLVCGDEASGCHYGVTTCGSCKVFFKRAVEGKCSW----QHNYLCAGRND-----C-  
MCR\_SAISC CLVCGDEASGCHYGVTTCGSCKVFFKRAVEG-----QHNYLCAGRND-----C-  
NP\_037263.1 CLVCGDEASGCHYGVTTCGSCKVFFKRAVEG-----QHNYLCAGRND-----C-  
XP\_356093.1 CLVCGDEASGCHYGVTTCGSCKVFFKRAVEG-----QHNYLCAGRND-----C-  
MCR\_MOUSE CLVCGDEASGCHYGVTTCGSCKVFFKRAVE-----HNYLCAGRND-----C-  
MCR\_TUPGB CLVCGDGASGCHYGVTTCGSCKVFFKRAVEG-----QHNYLCAGRND-----C-  
AAM27890.1 CLVCGDEASGCHYGVTTCGSCKVFFKRAVEG-----QHNYLCAGRND-----C-  
1LAT CLVCSDEASGCHYGVLTCGCKAFFKRAVEG-----QHNYLCKYEGK-----C-  
CAC67405.1 CLVCGDEASGCHYGVTTCGSCKVFFKRAVEG-----QHNYLCAGRND-----C-  
AAK20931.1 CVICCDEASGCHYGVIITCGSCKVFFKRASEG-----QNNYLCAGRND-----C-  
AAA49009.1 CLICGDEASGCHYGVLTCGSCKVFFKRAMEG-----TISYHCS-----  
AAA49010.1 CLICGDEASGCHYGVLTCGSCKVFFKRAMEG-----TISYHCS-----  
AAA49012.1 CLICGDEASGCHYGVLTCGSCKVFFKRAMEG-----QHNYLCAGRND-----C-  
NP\_990593.1 CLICGDEASGCHYGVLTCGSCKVFFKRAMEG-----QHNYLCAGRND-----C-  
AAA49013.1 CLICGDEASGCHYGVLTCGSCKVFFKRAMEG-----QHNYLCAGRND-----C-  
AAA49014.1 CLICGDEASGCHYGVLTCGSCKVFFKRAMEG-----QHNYLCAGRND-----C-  
AAA60081.1 CLICGDEASGCHYGVLTCGSCKVFFKRAMEG-----QHNYLCAGRND-----C-  
BAC11013.1 CLICGDEASGCHYGVLTCGSCKVFFKRAMEG-----QHNYLCAGRND-----C-

|             |                                                        |
|-------------|--------------------------------------------------------|
| AAQ96833.1  | CLICGDEASGCHYGVLTCGSCKVFFKRAMEG-----QHNYLCAGRND-----C- |
| QRHUP       | CLICGDEASGCHYGVLTCGSCKVFFKRAMEG-----QHNYLCAGRND-----C- |
| PRGR_HUMAN  | CLICGDEASGCHYGVLTCGSCKVFFKRAMEG-----QHNYLCAGRND-----C- |
| NP_000917.2 | CLICGDEASGCHYGVLTCGSCKVFFKRAMEG-----QHNYLCAGRND-----C- |
| AAG09282.1  | CLICGDEASGCHYGVLTCGSCKVFFKRAMEG-----QHNYLCAGRND-----C- |
| CAD89880.1  | CLICGDEASGCHYGVLTCGSCKVFFKRAMEG-----QHNYLCAGRND-----C- |
| PRGR_SHEEP  | CLICGDEASGCHYGVLTCGSCKVFFKRAMEG-----QHNYLCAGRND-----C- |
| PRGR_RABIT  | CLICGDEASGCHYGVLTCGSCKVFFKRAMEG-----QHNYLCAGRND-----C- |
| BAC29608.1  | CLICGDEASGCHYGVLTCGSCKVFFKRAMEG-----QHNYLCAGRND-----C- |
| NP_032855.1 | CLICGDEASGCHYGVLTCGSCKVFFKRAMEG-----QHNYLCAGRND-----C- |
| BAC35662.1  | CLICGDEASGCHYGVLTCGSCKVFFKRAMEG-----QHNYLCAGRND-----C- |
| NP_074038.1 | CLICGDEASGCHYGVLTCGSCKVFFKRAMEG-----QHNYLCAGRND-----C- |
| XP_346819.1 | CLICGDEASGCHYGVLTCGSCKVFFKRAMEG-----QHNYLCAGRND-----C- |
| AAK77950.1  | CLICGDEASGCHYGVLTCGSCKVFFKRAMEG-----QHNYLCAGRND-----C- |
| BAB91074.1  | CLICGDEASGCHYGVLTCGSCKVFFKRAMEG-----QHNYLCAGRND-----C- |
| BAC06585.1  | CLICGDEASGCHYGVLTCGSCKVFFKRAMEG-----QHNYLCAGRND-----C- |
| BAC11012.1  | CLICGDEASGCHYGVLTCGSCKVFFKRAMEG-----QHNYLCAGRND-----C- |
| AAA49039.1  | CLICGDEASGCHYGVLTCGSCKVFFKRAMEG-----QHNYLCAGRND-----C- |
| AAG01366.1  | CLICGDEASGCHYGVLTCGSCKVFFKRAIEG-----HQNYLCAGRND-----C- |
| AAL55260.1  | CLICGDEASGCHYGVLTCGSCKVFFKRAIEG-----HQNYLCAGRND-----C- |
| AAG42362.1  | CLICGDEASGCHYGVLTCGSCKVFFKRAIEG-----QHNYLCAGRND-----C- |
| AAN63590.1  | CLICSDEASGCHYGALTCGSCKVFFKRAIEG-----QHNYLCAGRND-----C- |
| BAA89539.1  | CVICGDEASGCHYGVLTCGSCKVFFKRAVEG-----HHNYLCAGRND-----C- |
| BAC11011.1  | CLICGDEASGCHYGVLTCGSCKVFFKRAMEG-----RKFKKFNKVR-----    |
| GCR_SHEEP   | CLVCSDEASGCHYGVLTCGSCKVFFKRAVEG-----QH-----            |
| A34721      | CLICGDEASGCHYGALTCGSCKVFFKRAAEG-----KQKYLCASRND-----C- |
| ANDR_PANTR  | CLICGDEASGCHYGALTCGSCKVFFKRAAEG-----KQKYLCASRND-----C- |
| ANDR_HUMAN  | CLICGDEASGCHYGALTCGSCKVFFKRAAEG-----KQKYLCASRND-----C- |
| AAA51775.1  | CLICGDEASGCHYGALTCGSCKVFFKRAAEG-----KQKYLCASRND-----C- |
| AAA51780.1  | CLICGDEASGCHYGALTCGSCKVFFKRAAEG-----KQKYLCASRND-----C- |
| AAD45921.1  | CLICGDEASGCHYGALTCGSCKVFFKRAAEG-----KQKYLCASRND-----C- |
| B34721      | CLICGDEASGCHYGALTCGSCKVFFKRAAEG-----KQKYLCASRND-----C- |
| NP_000035.2 | CLICGDEASGCHYGALTCGSCKVFFKRAAEG-----KQKYLCASRND-----C- |
| AAA51735.1  | CLICGDEASGCHYGALTCGSCKVFFKRAAEG-----KQKYLCASRND-----C- |
| AAA51770.1  | CLICGDEASGCHYGALTCGSCKVFFKRAAEG-----KQKYLCASRND-----C- |
| AAA51771.1  | CLICGDEASGCHYGALTCGSCKVFFKRAAEG-----KQKYLCASRND-----C- |
| ANDR_MACFA  | CLICGDEASGCHYGALTCGSCKVFFKRAAEG-----KQKYLCASRND-----C- |
| ANDR_PAPHA  | CLICGDEASGCHYGALTCGSCKVFFKRAAEG-----KQKYLCASRND-----C- |
| AAS19691.1  | CLICGDEASGCHYGALTCGSCKVFFKRAAEG-----KQKYLCASRND-----C- |
| AAA51774.1  | CLICGDKASGCHYGALTCGSCKVFFKRAAEG-----KQKYLCASRND-----C- |
| AAM96904.1  | CLICGDEASGCHYGALTCGSCKVFFKRAAEG-----KQKYLCASRND-----C- |
| AAG37994.1  | CLICGDEASGCHYGALTCGSCKVFFKRAAEG-----KQKYLCASRND-----C- |
| AAG40566.1  | CLICGDEASGCHYGALTCGSCKVFFKRAAEG-----KQKYLCASRND-----C- |
| ANDR_EULFC  | CLICGDEASGCHYGALTCGSCKVFFKRAAEG-----KQKYLCASRND-----C- |
| AAQ84563.1  | CLICGDEASGCHYGALTCGSCKVFFKRAAEG-----KQKYLCASRND-----C- |
| ANDR_CANFA  | CLICGDEASGCHYGALTCGSCKVFFKRAAEG-----KQKYLCASRND-----C- |
| AAK51126.1  | CLICGDEASGCHYGALTCGSCKVFFKRAAEG-----KQKYLCASRND-----C- |
| B40494      | CLICGDEASGCHYGALTCGSCKVFFKRAAEG-----KQKYLCASRND-----C- |
| NP_036634.1 | CLICGDEASGCHYGALTCGSCKVFFKRAAEG-----KQKYLCASRND-----C- |
| AAA40734.1  | CLICGDEASGCHYGALTCGSCKVFFKRAAEG-----KQKYLCASRND-----C- |
| NP_038504.1 | CLICGDEASGCHYGALTCGSCKVFFKRAAEG-----KQKYLCASRND-----C- |
| ANDR_RABIT  | CLICGDEASGCHYGALTCGSCKVFFKRAAEG-----KQKYLCASRND-----C- |
| AAB28340.1  | CLICGDEASGCHYGALTCGSCKVFFKRAAEG-----KQKYLCASRND-----C- |
| AAC97386.1  | CLICGDEASGCHYGALTCGSCKVFFKRAAEG-----KQKYLCASRND-----C- |
| AAP85538.1  | CLSCDEASGCHYEALTCGSCKVFFKRAAEG-----NQKYLCASRND-----C-  |
| AAO61694.1  | CMICSDEASGCHYGALTCGSCKVFFKRAAEG-----KQKYLCASKND-----C- |
| BAA33451.1  | CLICSDEASGCHYGALTCGSCKVFFKRAAEG-----KQKYLCASKND-----C- |

AAG48340.1 CLICSDEASGCHYGALTCGSCKVFFKRAAEG-----KQKYLCAASKND-----C-  
 AAO83572.1 CLICSDEASGCHYGALTCGSCKVFFKRAAEG-----KQKYLCAASKND-----C-  
 AAO83573.1 CLICSDEASGCHYGALTCGSCKVFFKRAAEG-----KQKYLCAASKND-----C-  
 AAL92878.1 CLICSDEASGCHYGALTCGSCKVFFKRAAEG-----KQKYLCAASKND-----C-  
 BAB20082.1 CLICSDEASGCHYGALTCGSCKVFFKRAAEG-----KQKYLCAASKND-----C-  
 BAC98301.1 CLICSDEASGCHYGALTCGSCKVFFKRAAEG-----KQKYLCAASKND-----C-  
 BAA32784.1 CLICAEASGCHYGALTCGSCKVFFKRAAEG-----KQKYLCAASRND-----C-  
 BAA32785.1 CLICADEASGCHYGALTCGSCKVFFKRAAEG-----KQKYLCAASRND-----C-  
 BAA83805.1 CLICADEASGCHYGALTCGSCKVFFKRAAEG-----KQRYLCAASRND-----C-  
 AAM09278.1 CLICSDEASGCHYGALTCGSCKVFFKRAAEG-----KQKYLCAASRND-----C-  
 BAA75464.1 CLICGDEASGCHYGALTCGSCKVFFKRAAEG-----KQKYLCAASIND-----C-  
 JG0194 CLICGDEASGCHYGALTCGSCKVFFKRAAEG-----KQKYLCAASIND-----C-  
 AAD25074.1 CQVCGDDASGCHYGAVTCGSCKVFFKRAAAG-----KQNHLCAASRND-----C-  
 BAB20081.1 CQVCGDGASGCHYGAVTCGSCKVFFKRAAAG-----KQNHLCAASRND-----C-

\* \* : : \* \* \*\* \*

AAB48082.1 --VDKDKRNQ---CR-YCR--LKKCFRA-----GMKKE-----A  
 AAP82997.1 --VDKDKRNQ---CR-YCR--LKKCFRA-----GMKKE-----A  
 HN4A\_HUMAN --VDKDKRNQ---CR-YCR--LKKCFRA-----GMKKE-----A  
 JC6096 --VDKDKRNQ---CR-YCR--LKKCFRA-----GMKKE-----A  
 JC4937 --VDKDKRNQ---CR-YCR--LKKCFRA-----GMKKE-----A  
 JC4938 --VDKDKRNQ---CR-YCR--LKKCFRA-----GMKKE-----A  
 NP\_000448.3 --VDKDKRNQ---CR-YCR--LKKCFRA-----GMKKE-----A  
 AAH39220.1 --VDKDKRNQ---CR-YCR--LKKCFRA-----GMKKE-----A  
 BAB03286.1 --VDKDKRNQ---CR-YCR--LKKCFRA-----GMKKE-----A  
 CAA54248.1 --VDKDKRNQ---CR-YCR--LKKCFRA-----GMKKE-----A  
 CAA61133.1 --VDKDKRNQ---CR-YCR--LKKCFRA-----GMKKE-----A  
 A36471 --VDKDKRNQ---CR-YCR--LKKCFRA-----GMKKE-----A  
 1705219A --VDKDKRNQ---CR-YCR--LKKCFRA-----GMKKE-----A  
 NP\_032287.1 --VDKDKRNQ---CR-YCR--LKKCFRA-----GMKKE-----A  
 NP\_071516.1 --VDKDKRNQ---CR-YCR--LKKCFRA-----GMKKE-----A  
 NP\_849180.1 --VDKDKRNQ---CR-YCR--LKKCFRA-----GMKKE-----A  
 NP\_849181.1 --VDKDKRNQ---CR-YCR--LKKCFRA-----GMKKE-----A  
 AAH42224.1 --VDKDKRNQ---CR-YCR--LKKCFRA-----GMKKE-----A  
 HN4A\_XENLA --VDKDKRNQ---CR-YCR--LKKCFRA-----GMKKE-----A  
 AAH56550.1 --VDKDKRNQ---CR-YCR--LKKCFRA-----GMKKE-----A  
 NP\_919349.1 --VDKDKRNQ---CR-YCR--LKKCFRA-----GMKKE-----A  
 AAC02906.1 --VDKDKRNQ---CR-YCR--LKKCFR-----  
 HN4B\_XENLA --VDKDKRNQ---CR-YCR--LRKCFRA-----GMKKE-----A  
 CAA89990.2 --VDKDKRNQ---CR-YCR--LRKCFRA-----GMKKE-----A  
 HN4G\_HUMAN --VDKDKRNQ---CR-YCR--LRKCFRA-----GMKKE-----A  
 JC6095 --VDKDKRNQ---CR-YCR--LRKCFRA-----GMKKE-----A  
 NP\_004124.3 --VDKDKRNQ---CR-YCR--LRKCFRA-----GMKKE-----A  
 NP\_991380.1 --VDKDKRNQ---CR-YCR--LRKCFRA-----GMKKE-----A  
 HN4G\_MOUSE --VDKDKRNQ---CR-YCR--LRKCFRA-----GMKKE-----A  
 NP\_038948.1 --VDKDKRNQ---CR-YCR--LRKCFRA-----GMKKE-----A  
 AAH54009.1 --VDKDKRNQ---CR-YCR--LRKCFRA-----K K K K K-----  
 NP\_991109.1 --VDKDKRNQ---CR-YCR--LRKCFRA-----GMRKE-----A  
 AAB93762.1 --VDKDKRNQ---CR-YCR--LRKCFKA-----GMKKE-----A  
 AAB93763.1 --VDKDKRNQ---CR-YCR--LRKCFKA-----GMKKE-----A  
 NP\_723413.1 --VDKDKRNQ---CR-YCR--LRKCFKA-----GMKKE-----A  
 S36218 --VDKDKRNQ---CR-YCR--LRKCFKA-----GMKKE-----A  
 NP\_723414.1 --VDKDKRNQ---CR-YCR--LRKCFKA-----GMKKE-----A  
 NP\_476887.2 --VDKDKRNQ---CR-YCR--LRKCFKA-----GMKKE-----A  
 AAC72723.1 --VDKDKRNQ---CR-YCR--LRKCFKA-----GMKKE-----A  
 AAC72724.1 --VDKDKRNQ---CR-YCR--LRKCFKA-----GMKKE-----A  
 AAO39177.1 --VDKAKRNS---CR-KCR--FDVCLRK-----GMRRD-----A

|             |                                               |
|-------------|-----------------------------------------------|
| NP_491103.1 | --VDKAKRNS---CR-KCR--FDVCLRK-----GMRRD-----A  |
| CAE60575.1  | --VDKAKRNS---CR-KCR--FDVCIRK-----GMKRD-----A  |
| NP_492615.2 | --VTKNKRNA---CR-ACR--LQKCVKA-----GMKSN-----A  |
| T25211      | --VTKNKRNA---CR-ACR--LQKCVKA-----GMKSN-----A  |
| CAE60269.1  | --VTRNKRNA---CR-ACR--LQKCVKA-----GMKSN-----A  |
| AAG15130.1  | --IDKHNRAV---CR-YCR--FMKCISS-----GMRDD-----Q  |
| NH35_CAEEEL | --IDKHNRAV---CR-YCR--FMKCISS-----GMRDD-----Q  |
| NP_508779.3 | --IDKHNRAV---CR-YCR--FMKCISS-----GMRDD-----Q  |
| T34093      | --IDKHNRAV---CR-YCR--FMKCISS-----GMRDD-----Q  |
| CAE68607.1  | --IDKHNRAV---CR-YCR--FMKCIAS-----GMRDD-----Q  |
| NP_496066.2 | --VTTMARKA---CR-ACR--YRKCLLES-----GMSKE-----A |
| T20416      | --VTTMARKA---CR-ACR--YRKCLLES-----GMSKE-----A |
| CAE56399.1  | --TTTMARKA---CR-ACR--YRKCLLES-----GMSKE-----A |
| NP_492612.1 | --IDKNFRCA---CR-YCR--FQKCVQV-----GMKRE-----A  |
| NP_492613.1 | --IDKNFRCA---CR-YCR--FQKCVQV-----GMKRE-----A  |
| NP_871798.1 | --IDKNFRCA---CR-YCR--FQKCVQV-----GMKRE-----A  |
| NP_871799.1 | --IDKNFRCA---CR-YCR--FQKCVQV-----GMKRE-----A  |
| AAK17977.1  | --IDKNFRCA---CR-YCR--FQKCVQV-----GMKRE-----A  |
| AAG15141.1  | --IDKNFRCA---CR-YCR--FQKCVQV-----GMKRE-----A  |
| AAG15143.1  | --IDKNFRCA---CR-YCR--FQKCVQV-----GMKRE-----A  |
| CAE60267.1  | --IDKNFRCA---CR-YCR--FQKCVQV-----GMKRE-----A  |
| AAP13776.1  | --IDKDHRNA---CR-YCR--FQKCLAD-----GMKPE-----A  |
| CAE74907.1  | --IDKDHRNA---CR-YCR--FQKCLAD-----GMKPE-----A  |
| H89591      | --IDKDHRNA---CR-YCR--FQKCLAD-----GMKPE-----A  |
| NH14_CAEEEL | --IDKDHRNA---CR-YCR--FQKCLAD-----GMKPE-----A  |
| NP_741860.1 | --IDKDHRNA---CR-YCR--FQKCLAD-----GMKPE-----A  |
| NP_741861.1 | --IDKDHRNA---CR-YCR--FQKCLAD-----GMKPE-----A  |
| NP_509116.2 | --FTKDFRCA---CR-ACR--FEKCVRV-----GMNPS-----A  |
| T34118      | --FTKDFRCA---CR-ACR--FEKCVRV-----GMNPS-----A  |
| CAE65766.1  | --FTKDFRCA---CR-ACR--FEKCVRV-----GMNPS-----A  |
| CAE65768.1  | NTLPKEKRCS---CR-SCR--FQKCEV-----GMNPY-----A   |
| AAD31548.2  | --VAKEQRNA---CR-SCR--LKECIKV-----GMNPR-----A  |
| D88206      | --VAKEQRNA---CR-SCR--LKECIKV-----GMNPR-----A  |
| AAD03691.1  | --VAKEQRNA---CR-SCR--LKECIKV-----GMNPR-----A  |
| AAO38653.1  | --VAKEQRNA---CR-SCR--LKECIKV-----GMNPR-----A  |
| NP_495534.3 | --VAKEQRNA---CR-SCR--LKECIKV-----GMNPR-----A  |
| AAO38655.1  | --VAKEQRNA---CR-SCR--LKECIKV-----GMNPR-----A  |
| CAE67598.1  | --VAKEQRNA---CR-ACR--LTTCLRV-----GMNPR-----A  |
| AAG15158.1  | --VAKEQRNA---CR-SCR--LTRCLDV-----GMNPR-----A  |
| AAG15160.1  | --VAKEQRNA---CR-SCR--LTRCLDV-----GMNPR-----A  |
| NP_497073.1 | --VAKEQRNA---CR-SCR--LTRCLDV-----GMNPR-----A  |
| NP_497074.1 | --VAKEQRNA---CR-SCR--LTRCLDV-----GMNPR-----A  |
| CAE60603.1  | --VAKEQRNA---CR-SCR--LAQCLKV-----GMNPR-----A  |
| AAG15162.1  | --IAKEHRNV---CR-ACR--LKQCFVA-----GMNPR-----A  |
| AAG15163.1  | --IAKEHRNV---CR-ACR--LKQCFVA-----GMNPR-----A  |
| NP_492607.1 | --IAKEHRNV---CR-ACR--LKQCFVA-----GMNPR-----A  |
| T23558      | --IAKEHRNV---CR-ACR--LKQCFVA-----GMNPR-----A  |
| CAE60279.1  | --IAKEHRNV---CR-ACR--LKQCFVA-----GMNPR-----A  |
| NP_501775.1 | --VVKEHRNV---CR-SCR--LKKCFEV-----GMNPD-----S  |
| T21645      | --VVKEHRNV---CR-SCR--LKKCFEV-----GMNPD-----S  |
| CAE59975.1  | --VVKEHRNV---CR-SCR--LKKCFEV-----GMNPD-----S  |
| NP_510201.2 | --VDKNARCA---CR-ACR--LAKCYAV-----GMDKK-----A  |
| T23520      | --VDKNARCA---CR-ACR--LAKCYAV-----GMDKK-----A  |
| AAO39173.1  | --VDKNARCA---CR-ACR--LAKCYAV-----GMDKK-----A  |
| CAE61407.1  | --VDKNARCA---CR-ACR--LAKCYAV-----GMDKK-----A  |
| AAM69090.1  | --VGKSVRCV---CR-SCR--LKKCFDM-----GMDPK-----A  |
| NP_741729.1 | --VGKSVRCV---CR-SCR--LKKCFDM-----GMDPK-----A  |

|             |                                                   |
|-------------|---------------------------------------------------|
| NH40_CAEEL  | --VGKSVRCV---CR-SCR--LKKCFDM-----GMDPK-----A      |
| CAE58853.1  | --VGKSVRCV---CR-SCR--LKKCFDM-----GMDPK-----A      |
| T16793      | --VGKCDGSMR--LQ-KLS--AEKMLRY-----GNGSQ-----G      |
| AAO39201.1  | --VDKTIRCA---CR-YCR--FEKCLSV-----GMDRN-----A      |
| AAO39202.1  | --VDKTIRCA---CR-YCR--FEKCLSV-----GMDRN-----A      |
| AAO39203.1  | --VDKTIRCA---CR-YCR--FEKCLSV-----GMDRN-----A      |
| AAO27833.1  | --VDKTIRCA---CR-YCR--FEKCLSV-----GMDRN-----A      |
| NP_504164.1 | --VDKTIRCA---CR-YCR--FEKCLSV-----GMDRN-----A      |
| CAE58326.1  | --VDKTIRCA---CR-YCR--FEKCLNV-----GMDRN-----A      |
| AAO39172.1  | --VDKSIRCA---CR-HCR--FEKCLQV-----GMDRN-----A      |
| NP_498554.1 | --VDKSIRCA---CR-HCR--FEKCLQV-----GMDRN-----A      |
| CAE70133.1  | --VDKSVRCA---CR-HCR--FEKCLQV-----GMDRN-----A      |
| AAO39181.1  | --VDKSIRCA---CR-FCR--FEKCLKV-----GMDKT-----S      |
| NP_505936.1 | --VDKSIRCA---CR-FCR--FEKCLKV-----GMDKT-----S      |
| CAE75338.1  | --VDKSIRCA---CR-FCR--FEKCLKV-----GMDKA-----A      |
| AAO39189.1  | --VDKSIRCA---CR-FCR--FEKCIQV-----GMDKS-----A      |
| NP_505935.2 | --VDKSIRCA---CR-FCR--FEKCIQV-----GMDKS-----A      |
| CAE75339.1  | --VDRSIRCA---CR-YCR--FEKCLKV-----GMDRS-----A      |
| NP_510834.2 | --VNKNIRCA---CR-HCR--FNKCLLV-----GMDAK-----A      |
| T28881      | --VNKNIRCA---CR-HCR--FNKCLLV-----GMDAK-----A      |
| AAP46279.1  | --VNKNIRCA---CR-HCR--FNKCLLV-----GMDAK-----A      |
| AAO39167.1  | --VNKNIRCA---CR-HCR--FNKCLLV-----GMDAK-----A      |
| CAE58689.1  | --VNKNIRCA---CR-HCR--FNKCLLV-----GMDAK-----A      |
| AAO39170.1  | --VNKNIRCA---CR-HCR--FNKCLLV-----GMDAKALQI-----PA |
| AAP46278.1  | --VNKNIRCA---CR-HCR--FNKCLLV-----GMDAKALQI-----PA |
| NHR1_CAEEL  | --VNKNIRCA---CR-HCR--FNKCLLV-----GMDAKALQI-----PA |
| NP_504455.1 | --VNKGVRCA---CR-YCR--LQKCLAV-----GMDKNS-----      |
| T33174      | --VNKGVRCA---CR-YCR--LQKCLAV-----GMDKNS-----      |
| G89050      | --VNKGVRCA---CR-YCR--LQKCLAV-----GMDKNS-----      |
| CAE64622.1  | --VNKGVRCA---CR-ACR--LQKCLAV-----GMDTNS-----      |
| NP_504453.1 | --VNKGVRCA---CR-YCR--LQKCLAV-----GMDKN-----       |
| CAE57227.1  | --IDKSMRCS---CR-HCR--YKKCIA-----GMDRA-----E       |
| NP_510115.1 | --IDKSMRCS---CR-HCR--YKKCIA-----GMDRG-----E       |
| AAG15127.1  | --VDKFQRNS---CR-YCR--FQRCIQA-----GMDPK-----A      |
| NP_741456.1 | --VDKFQRNS---CR-YCR--FQRCIQA-----GMDPK-----A      |
| AAG15128.1  | --VDKFQRNS---CR-YCR--FQRCIQA-----GMDPK-----A      |
| CAE70940.1  | --VDKYQRNS---CR-FCR--FERCIQA-----GMDPK-----A      |
| AAM81108.1  | --VDKYFNVV---FK-----QEWIQK-----                   |
| CAE72428.1  | --VDRHERNS---C---S---SFLF-EN-----LLYPK-----I      |
| NP_494368.1 | --VDRHERNS---CR-FFS--NFLFLKN-----FLIPK-----       |
| CAE62036.1  | --VTKFERNA---CR-YCR--FRKCLLV-----GMNPD-----Y      |
| NP_502117.2 | --VTKFERNA---CR-YCR--FRKCLLV-----GMNPD-----Y      |
| AAG15179.1  | --IDKDQRNA---CR-YCR--FQRCLTV-----GMEPE-----A      |
| AAR30203.1  | --IDKDQRNA---CR-YCR--FQRCLTV-----GMEPE-----A      |
| AAO21381.1  | --IDKDQRNA---CR-YCR--FQRCLTV-----GMEPE-----A      |
| NP_494413.2 | --IDKDQRNA---CR-YCR--FQRCLTV-----GMEPE-----A      |
| CAE72436.1  | --IDKDQRNA---CR-YCR--FQRCLNV-----GMEPD-----A      |
| CAE63197.1  | --IDKAGRNV---CR-SCR--FQKCLEV-----GMEPD-----A      |
| NP_510423.1 | --IDKAGRNV---CR-SCR--FQKCLEV-----GMEPD-----A      |
| AAC24264.2  | --IQKGTRNI---CR-ACR--YKKCLQV-----GMNVK-----G      |
| NP_501348.1 | --IQKGTRNI---CR-ACR--YKKCLQV-----GMNVK-----G      |
| CAE70941.1  | --IEKGTRNI---CR-ACR--YKKCLQV-----GMNVK-----D      |
| AAG15129.1  | --VVQEYRNR---CR-ACR--LRKCFTV-----GMDAR-----A      |
| T22948      | --VVQEYRNR---CR-ACR--LRKCFTV-----GMDAR-----A      |
| NP_741480.1 | --VVQEYRNR---CR-ACR--LRKCFTV-----GMDAR-----A      |
| CAC70099.2  | --VVQEYRNR---CR-ACR--LRKCFTV-----GMDAR-----A      |
| CAE46673.1  | --VVQEYRNR---CR-ACR--LRKCFTV-----GMDAR-----A      |

|             |                                               |
|-------------|-----------------------------------------------|
| CAE74760.1  | --IVQEYRNR---CR-ACR--LRKCFTV-----GMDAR-----A  |
| CAC70072.3  | --VLQQFRNR---CR-ACR--FNKCVMV-----GMDAR-----A  |
| NP_501730.2 | --VLQQFRNR---CR-ACR--FNKCVMV-----GMDAR-----A  |
| CAE69003.1  | --VSQVYRNR---CR-ACR--LQKCYSV-----GMDEK-----S  |
| NP_501731.1 | --IEFKYRNR---CR-ACR--LKRCLHV-----GMDAN-----A  |
| T19540      | --IEFKYRNR---CR-ACR--LKRCLHV-----GMDAN-----A  |
| CAE69004.1  | --IETKYRNR---CR-QCR--LKKCEAV-----GMDRE-----A  |
| NP_504213.1 | --IEHKYRNR---CR-ACR--LEKCFRA-----GMDAS-----A  |
| AAD05225.1  | --VDKTHRNO---CR-ACR--LAKCFQS-----AMNKD-----A  |
| NP_477140.1 | --VDKTHRNO---CR-ACR--LAKCFQS-----AMNKD-----A  |
| XP_318587.1 | --VDKTHRNO---CR-ACR--LSKCFQS-----AMNKD-----A  |
| AAF71999.1  | --IDKTHRNO---CR-ACR--LKKCQNV-----GMNKD-----A  |
| AAF74116.1  | --IDKTHRNO---CR-ACR--LKKCQNV-----GMNKD-----A  |
| AAO39180.1  | --VDKTHRNO---CR-ACR--LRKCLEI-----GMNKD-----A  |
| NP_502094.1 | --VDKTHRNO---CR-ACR--LRKCLEI-----GMNKD-----A  |
| CAE62015.1  | --VDKTHRNO---CR-ACR--LRKCLEI-----GMNKD-----A  |
| B47265      | --VDKTHRNO---CR-ACR--LRKCFEV-----GMNKD-----A  |
| TLL_DROVI   | --VDKTHRNO---CR-ACR--LRKCFEV-----GMNKD-----A  |
| NP_524596.1 | --VDKTHRNO---CR-ACR--LRKCFEV-----GMNKD-----A  |
| XP_316782.1 | --VDKTHRNO---CR-ACR--LKKCFEV-----GMNKD-----A  |
| AAM61763.1  | --VDKTHRNO---CR-ACR--LKKCLEV-----NMNKD-----A  |
| NR21_ORYLA  | --VDKTHRNO---CR-ACR--LKKCLEV-----NMNKD-----A  |
| NR21_XENLA  | --VDKTHRNO---CR-ACR--LKKCLEV-----NMNKD-----A  |
| NP_003260.1 | --VDKTHRNO---CR-ACR--LKKCLEV-----NMNKD-----A  |
| NP_689415.1 | --VDKTHRNO---CR-ACR--LKKCLEV-----NMNKD-----A  |
| NP_990501.1 | --VDKTHRNO---CR-ACR--LKKCLEV-----NMNKD-----A  |
| AAF79295.1  | --IDKTHRNO---CR-ACR--LKKCVQV-----DMNKD-----A  |
| AAL29193.1  | --VDKIHRNO---CR-SCR--LKKCFEV-----TMNKD-----A  |
| NP_055064.1 | --VDKAHRNO---CQ-ACR--LKKCLQA-----GMNQD-----A  |
| NP_057430.1 | --VDKAHRNO---CQ-ACR--LKKCLQA-----GMNQD-----A  |
| NP_038736.1 | --VDKAHRNO---CQ-ACR--LKKCLQA-----GMNQD-----A  |
| AAF15392.2  | --VDKAHRNO---CQ-ACR--LKKCLQA-----GMNQD-----A  |
| NP_989925.1 | --VDKAHRNO---CQ-ACR--LKKCLQA-----GMNKD-----A  |
| NP_508547.1 | --VDKAHRNO---CQ-ACR--LKKCLNK-----GMNKD-----A  |
| T29238      | --VDKAHRNO---CQ-ACR--LKKCLNK-----GMNKD-----A  |
| CAE68391.1  | --VDKAHRNO---CQ-ACR--LKKCLNK-----GMNKD-----A  |
| NP_611032.1 | --DFDGFVRV---GM-ALSPDLIK-VPP-----GQNKG-----R  |
| XP_305999.1 | -----                                         |
| NP_725457.1 | --VDKAHRNO---CQ-ACR--LKKCLQM-----GMNKD-----D  |
| XP_319010.1 | --VDKAHRNO---CQ-ACR--LKKCLTM-----GMNKD-----   |
| XP_345117.1 | ---NQSLHSP---GE-AGP-----ATGRA-----V           |
| CAE65008.1  | --VDKGRRW---CP-ACR--LAKCTKL-----NMNRL-----A   |
| NP_497579.1 | --VDKGRRW---CP-ACR--LAKCTRL-----KMNRLG-----PA |
| NP_649647.1 | --VDKARRNW---CP-SCR--FQRCLAV-----GMNAA-----A  |
| XP_307951.1 | --VDKARRNW---CP-FCR--LQKCFV-----GMNAA-----A   |
| CAE70300.1  | --IDVVRNO---CQ-SCR--FQKCLAV-----SMNRH-----A   |
| XP_321796.1 | --VDVSRNO---CQ-ACR--FAKCLQA-----NMRRE-----A   |
| CAB05521.2  | --IDKANRNR---CK-SCR--IKKCFKK-----GMNKN-----A  |
| NP_507060.1 | --IDKANRNR---CK-SCR--IKKCFKK-----GMNKN-----A  |
| 1411299B    | -VIDKITRN---QCQ-LCR--FKKCIAV-----AMAMD-----L  |
| CAA68539.1  | -VIDKITRN---QCQ-LCR--FKKCIAV-----AMAMD-----L  |
| AAH35137.1  | -VIDKITRN---QCQ-LCR--FKKCIAV-----GMAMD-----L  |
| TVRTAR      | -VIDKITRN---QCQ-LCR--FKKCIAV-----GMAMD-----L  |
| XP_126580.1 | -VIDKITRN---QCQ-LCR--FKKCIAV-----GMAMD-----L  |
| THA1_SHEEP  | -VIDKITRN---QCQ-LCR--FKKCIAV-----GMAMD-----L  |
| THA_MOUSE   | -VIDKITRN---QCQ-LCR--FKKCIAV-----GMAMD-----L  |
| THA_PIG     | -VIDKITRN---QCQ-LCR--FKKCIAV-----GMAMD-----L  |

|             |                                              |
|-------------|----------------------------------------------|
| S06410      | -VIDKITRN---QCQ-LCR--FKKCIAV-----GMAMD-----L |
| S06907      | -VIDKITRN---QCQ-LCR--FKKCIAV-----GMAMD-----L |
| S09178      | -VIDKITRN---QCQ-LCR--FKKCIAV-----GMAMD-----L |
| S14417      | -VIDKITRN---QCQ-LCR--FKKCIAV-----GMAMD-----L |
| S14418      | -VIDKITRN---QCQ-LCR--FKKCIAV-----GMAMD-----L |
| NP_955366.1 | -VIDKITRN---QCQ-LCR--FKKCIAV-----GMAMD-----L |
| NP_835161.1 | -VIDKITRN---QCQ-LCR--FKKCIAV-----GMAMD-----L |
| CAA31237.1  | -VIDKITRN---QCQ-LCR--FKKCIAV-----GMAMD-----L |
| CAA38899.1  | -VIDKITRN---QCQ-LCR--FKKCIAV-----GMAMD-----L |
| CAA06701.1  | -VIDKITRN---QCQ-LCR--FKKCIAV-----GMAMD-----L |
| CAB57886.1  | -VIDKITRN---QCQ-LCR--FKKCIAV-----GMAMD-----L |
| NP_003241.2 | -VIDKITRN---QCQ-LCR--FKKCIAV-----GMAMD-----L |
| NP_112396.1 | -VIDKITRN---QCQ-LCR--FKKCIAV-----GMAMD-----L |
| QRMSA1      | -VIDKITRN---HCQ-LCR--FKKCIAV-----GMAMD-----L |
| A44776      | -VIDKITRN---QCQ-LCR--FKKCIIV-----GMAMD-----L |
| CAA36459.1  | -VIDKITRN---QCQ-LCR--FKKCIIV-----GMAMD-----L |
| AAA42393.1  | -VIDKITRN---QCQ-LCR--FKKCIIV-----GMAMD-----L |
| TVFVVR      | -VIDKITRN---QCQ-LCR--FKKCIIV-----GMAMD-----L |
| AAA42397.1  | -VIDKITRN---QCQ-LCR--FKKCIIV-----GMAMD-----L |
| AAA42398.1  | -VIDKITRN---QCQ-LCR--FKKCIIV-----GMAMD-----L |
| ERBA_AVIER  | -VIDKITRN---QCQ-LCR--FKKCIIV-----GMAMD-----L |
| CAA68260.1  | -VIDKITRN---QCQ-LCR--FKKCIIV-----GMAMD-----L |
| CAA05310.1  | -VIDKITRN---QCQ-LCR--FKKCIIV-----GMAMD-----L |
| THA_PYGAD   | -VIDKITRN---QCQ-LCR--FKKCIIV-----GMAMD-----L |
| CAA28545.1  | -VIDKITRN---QCQ-LCR--FKKCIIV-----GMAMD-----L |
| THA_CAIMO   | -VIDKITRN---QCQ-LCR--FKKCIIV-----GMAMD-----L |
| CAA05339.1  | -VIDKITRN---QCQ-LCR--FKKCIIV-----GMAMD-----L |
| NP_990644.1 | -VIDKITRN---QCQ-LCR--FKKCIIV-----GMAMD-----L |
| THA_APTPA   | -VIDKITRN---QCQ-LCR--FKKCIIV-----GMAMD-----L |
| THAB_XENLA  | -IIDKITRN---QCQ-LCR--FKKCIIV-----GMAMD-----L |
| TVXLTA      | -IIDKITRN---QCQ-LCR--FKKCIIV-----GMAMD-----L |
| THA_RANCA   | -IIDKITRN---QCQ-LCR--FKKCIIV-----GMAMD-----L |
| THAA_XENLA  | -IIDKITRN---QCQ-LCR--FKKCIIV-----GMAMD-----L |
| B36067      | -IIDKITRN---QCQ-LCR--FKKCIIV-----GMAMD-----L |
| AAO47435.1  | -IIDKITRN---QCQ-LCR--FKKCIIV-----GMAMD-----L |
| THAA_PAROL  | -IIDKITRN---QCQ-LCR--FKKCIIV-----GMAMD-----L |
| THA_HIPHI   | -IIDKITRN---QCQ-LCR--FKKCIIV-----GMAMD-----L |
| BAD11772.1  | -IIDKITRN---QCQ-LCR--FKKCIDV-----GMAMD-----L |
| NP_571471.1 | -IIDKITRN---QCQ-LCR--FRKCIIV-----GMAMD-----L |
| THAB_PAROL  | -IIDKITRN---QCQ-LCR--FKKCIIV-----GMAMD-----L |
| THA_SALSA   | -IIDKITRN---QCQ-LCR--FRKCIIV-----GMAMD-----L |
| THB1_MOUSE  | -IIDKVTRN---QCQ-ECR--FKKCIIV-----GMATD-----L |
| THB2_RAT    | -IIDKVTRN---QCQ-ECR--FKKCIIV-----GMATD-----L |
| THB1_RAT    | -IIDKVTRN---QCQ-ECR--FKKCIIV-----GMATD-----L |
| AAA40916.1  | -IIDKVTRN---QCQ-ECR--FKKCIIV-----GMATD-----L |
| NP_036804.1 | -IIDKVTRN---QCQ-ECR--FKKCIIV-----GMATD-----L |
| NP_033406.1 | -IIDKVTRN---QCQ-ECR--FKKCIIV-----GMATD-----L |
| THB2_HUMAN  | -VIDKVTRN---QCQ-ECR--FKKCIIV-----GMATD-----L |
| TVHUAR      | -VIDKVTRN---QCQ-ECR--FKKCIIV-----GMATD-----L |
| NP_000452.2 | -VIDKVTRN---QCQ-ECR--FKKCIIV-----GMATD-----L |
| 2NLLB       | -VIDKVTRN---QCQ-ECR--FKKCIIV-----GMATD-----L |
| CAB42095.1  | -VIDKVTRN---QCQ-ECR--FKKCIIV-----GMATD-----L |
| THB1_SHEEP  | -VIDKVTRN---QCQ-ECR--FKKCIIV-----GMATD-----L |
| NP_990778.1 | -VIDKVTRN---QCQ-ECR--FKKCIFV-----GMATD-----L |
| TVCHTB      | -VIDKVTRN---QCQ-ECR--FKKCIFV-----GMATD-----L |
| THB_CHICK   | -VIDKVTRN---QCQ-ECR--FKKCIFV-----GMATD-----L |
| AAA49654.1  | -VIDKVTRN---QCQ-ECR--FKKCIIV-----GMATD-----L |

|             |                                               |
|-------------|-----------------------------------------------|
| THBA_XENLA  | -VIDKVTRN---QCQ-ECR--FKKCIAV-----GMATD-----L  |
| AAL13127.1  | -VIDKVTRN---QCQ-ECR--FKKCIAV-----GMATD-----L  |
| THB_RANCA   | -VIDKVTRN---QCQ-ECR--FKKCIAV-----GMATD-----L  |
| D36067      | -VIDKVTRN---QCQ-ECR--FKKCKTV-----GMATD-----L  |
| THBB_XENLA  | -VIDKVTRN---QCQ-ECR--FKKCKTV-----GMATD-----L  |
| AAO47436.1  | -VIDKVTRN---QCQ-ECR--FRKCTYV-----GMATD-----L  |
| AAO62999.1  | -VIDKVTRN---QCQ-ECR--FKKCTHV-----GMATD-----L  |
| AAD38691.1  | -IIDKVTRN---QCQ-ECR--FKKCIAV-----GMATD-----L  |
| AAL06731.1  | -IIDKVTRN---QCQ-ECR--FKKCIAV-----GMATD-----L  |
| AAL06732.1  | -IIDKVTRN---QCQ-ECR--FKKCIAV-----GMATD-----L  |
| AAO86517.1  | -VIDKVTRN---QCQ-ECR--FKKCIAV-----GMATD-----L  |
| THB_PAROL   | -VIDKVTRN---QCQ-ECR--FKKCIAV-----GMATD-----L  |
| NP_571415.1 | -VIDKVTRN---QCQ-ECR--FKKCIAV-----GMATD-----L  |
| BAD11773.1  | -VIDKVTRN---QCQ-ECR--FKKCIAV-----GMATD-----L  |
| S06163      | -VIDKITRN---QCQ-LCR--FKKCIAV-----GM-----      |
| AAC42665.1  | -QVNKVS RN---QCQ-MCR--YEKCIAT-----GMATD-----L |
| BAB68358.1  | -QINKVS RN---QCQ-LCR--YKKCITT-----GMATD-----L |
| NHR1_ONCVO  | -EISKIS RN---ICQ-FCR--FQKCLRN-----GMTKS-----L |
| AAF68669.1  | -EINRQTRT---RCQ-ACR--YQQCLML-----ACHYD-----V  |
| CAE72381.1  | -EISRENR---ICQ-YCR--YQKCLQV-----GMTRDT-----L  |
| 1401244A    | -VINKVTRN---RCQ-YCR--LQKCFEV-----GHSKE-----S  |
| 1408258A    | -VINKVTRN---RCQ-YCR--LQKCFEV-----GMSKE-----S  |
| RRB_HUMAN   | -VINKVTRN---RCQ-YCR--LQKCFEV-----GMSKE-----S  |
| NP_000956.2 | -VINKVTRN---RCQ-YCR--LQKCFEV-----GMSKE-----S  |
| CAA68398.1  | -VINKVTRN---RCQ-YCR--LQKCFEV-----GMSKE-----S  |
| CAA30262.1  | -VINKVTRN---RCQ-YCR--LQKCFEV-----GMSKE-----S  |
| AAL02361.1  | -VINKVTRN---RCQ-YCR--LQKCFEV-----GMSKE-----S  |
| RRB_MOUSE   | -VINKVTRN---RCQ-YCR--LQKCFEV-----GMSKE-----S  |
| NP_035373.1 | -VINKVTRN---RCQ-YCR--LQKCFEV-----GMSKE-----S  |
| CAA05769.1  | -VINKVTRN---RCQ-YCR--LQKCFEV-----GMSKE-----S  |
| 1504304A    | -VINKVTRN---RCQ-YCR--LQKCFEV-----GMSKE-----S  |
| RRB_NOTVI   | -VINKVTRN---RCQ-YCR--LQKCFEV-----GMSKE-----S  |
| NP_990657.1 | -VINKVTRN---RCQ-YCR--LQKCFEV-----GMSKE-----S  |
| RRB_COTJA   | -VINKVTRN---RCQ-YCR--LQKCFEV-----GMSKE-----S  |
| S13512      | -VINKVTRN---RCQ-YCR--LQKCFEV-----GMSKE-----S  |
| CAA40615.1  | -VINKVTRN---RCQ-YCR--LQKCFEV-----GMSKE-----S  |
| CAA40616.1  | -VINKVTRN---RCQ-YCR--LQKCFEV-----GMSKE-----S  |
| A43786      | -VINKVTRN---RCQ-YCR--LQKCFEV-----GMSKE-----S  |
| AAB19628.1  | -VINKVTRN---RCQ-YCR--LQKCFEV-----GMSKE-----S  |
| AAA60126.1  | -IINKVTRN---RCQ-YCR--LQKCFEV-----GMSKE-----S  |
| AAB00112.1  | -IINKVTRN---RCQ-YCR--LQKCFEV-----GMSKE-----S  |
| NP_000955.1 | -IINKVTRN---RCQ-YCR--LQKCFEV-----GMSKE-----S  |
| AAB00113.1  | -IINKVTRN---RCQ-YCR--LQKCFEV-----GMSKE-----S  |
| AAB19602.2  | -IINKVTRN---RCQ-YCR--LQKCFEV-----GMSKE-----S  |
| AAB29813.1  | -IINKVTRN---RCQ-YCR--LQKCFEV-----GMSKE-----S  |
| AAC33511.1  | -IINKVTRN---RCQ-YCR--LQKCFEV-----GMSKE-----S  |
| AAD05222.1  | -IINKVTRN---RCQ-YCR--LQKCFEV-----GMSKE-----S  |
| AAF65452.1  | -IINKVTRN---RCQ-YCR--LQKCFEV-----GMSKE-----S  |
| CAA29787.1  | -IINKVTRN---RCQ-YCR--LQKCFEV-----GMSKE-----S  |
| NP_113716.1 | -IINKVTRN---RCQ-YCR--LQKCFEV-----GMSKE-----S  |
| CAA05767.1  | -IINKVTRN---RCQ-YCR--LQKCFEV-----GMSKE-----S  |
| CAA05768.1  | -IINKVTRN---RCQ-YCR--LQKCFEV-----GMSKE-----S  |
| CAA71177.1  | -IINKVTRN---RCQ-YCR--LQKCFEV-----GMSKE-----S  |
| AAL02360.1  | -IINKVTRN---RCQ-YCR--LQKCFEV-----GMSKE-----S  |
| CAA40749.1  | -IINKVTRN---RCQ-YCR--LQKCFDV-----GMSKE-----S  |
| RRR_MOUSE   | -IINKVTRN---RCQ-YCR--LQKCFDV-----GMSKE-----S  |
| NP_033050.1 | -IINKVTRN---RCQ-YCR--LQKCFDV-----GMSKE-----S  |

|             |                                                    |
|-------------|----------------------------------------------------|
| I50674      | -I INKVTRN---RCQ-YCR--LQKCFEV-----GMSKE-----S      |
| NP_989867.1 | -I INKVTRN---RCQ-YCR--LQKCFEV-----GMSKE-----S      |
| CAA55132.1  | -I INKVTRN---RCQ-YCR--LQKCFEV-----GMSKE-----S      |
| RRA_NOTVI   | -I INKVTRN---RCQ-YCR--LQKCFEV-----GMSKE-----S      |
| S78481      | -I INKVTRN---RCQ-YCR--LQKCFEV-----GMSKE-----S      |
| AAA50050.1  | -I INKVTRN---RCQ-YCR--LQKCLEV-----GMSKE-----S      |
| AAH49301.1  | -I INKVTRN---RCQ-YCR--LQKCLEV-----GMSKE-----S      |
| CAB43871.1  | -I INKVTRN---RCQ-YCR--LQKCLEV-----GMSKE-----S      |
| RRA_FUGRU   | -I INKVTRN---RCQ-YCR--LQKCLEV-----GMSKE-----S      |
| I51256      | -I INKVTRN---RCQ-YCR--LQKCLEV-----GMSKE-----S      |
| NP_571481.1 | -I INKVTRN---RCQ-YCR--LQKCLEV-----GMSKE-----S      |
| 1DSZA       | -I INKVTRN---RCQ-YCR--LQKCFEV-----GMSKE-----S      |
| A41977      | -I INKVTRN---RCQ-YCR--LQKCFEV-----GMSKE-----S      |
| A56558      | -I INKVTRN---RCQ-YCR--LQKCFEV-----GMSKE-----S      |
| RRA_XENLA   | -I INKVTRN---RCQ-YCR--LQKCFEV-----GMSKE-----S      |
| B56558      | -I INKVTRN---RCQ-YCR--LQKCFEV-----GMSKE-----S      |
| CAB60726.1  | -I INKVTRN---RCQ-YCR--LQKCFEV-----GMSKE-----A      |
| RRG2_HUMAN  | -I INKVTRN---RCQ-YCR--LQKCFEV-----GMSKE-----A      |
| RRG2_MOUSE  | -I INKVTRN---RCQ-YCR--LQKCFEV-----GMSKE-----A      |
| A34714      | -I INKVTRN---RCQ-YCR--LQKCFEV-----GMSKE-----A      |
| NP_035374.2 | -I INKVTRN---RCQ-YCR--LQKCFEV-----GMSKE-----A      |
| AAH19098.2  | -I INKVTRN---RCQ-YCR--LQKCFEV-----GMSKE-----A      |
| AAH64524.1  | -I INKVTRN---RCQ-YCR--LQKCFEV-----GMSKE-----A      |
| NP_000957.1 | -I INKVTRN---RCQ-YCR--LQKCFEV-----GMSKE-----A      |
| AAH13709.1  | -I INKVTRN---RCQ-YCR--LQKCFEV-----GMSKE-----A      |
| XP_217064.2 | -I INKVTRN---RCQ-YCR--LQKCFEV-----GMSKE-----A      |
| AAL02362.1  | -I INKVTRN---RCQ-YCR--LQKCFEV-----GMSKE-----A      |
| CAA52153.2  | -Q INKVTRN---RCQ-FCR--LQKCFEV-----GMSKE-----A      |
| A38592      | -Q INKVTRN---RCQ-FCR--LQKCFQV-----GMSKE-----A      |
| RRG_XENLA   | -Q INKVTRN---RCQ-FCR--LQKCFQV-----GMSKE-----A      |
| AAB47115.1  | -Q INKVTRN---RCQ-FCR--LQKCFQV-----GMSKE-----A      |
| AAB47116.1  | -Q INKVTRN---RCQ-FCR--LQKCFQV-----GMSKE-----A      |
| RRG_NOTVI   | -Q INKVTRN---RCQ-YCR--LQKCFEV-----GMSKE-----A      |
| S06124      | -Q INKVTRN---RCQ-YCR--LQKCFEV-----GMSKE-----A      |
| CAA49562.1  | -Q INKVTRN---RCQ-YCR--LQKCFEV-----GMSKE-----A      |
| AAF80975.1  | -Q INKVTRN---RCQ-YCR--LQKCFEV-----GMSKE-----A      |
| AAF80976.1  | -Q INKVTRN---RCQ-YCR--LQKCFEV-----GMSKEVVAAA-----A |
| AAB59953.1  | -Q INKVTRN---RCQ-YCR--LQKCFEV-----GMSKE-----A      |
| NP_571414.1 | -Q INKVTRN---RCQ-YCR--LQKCFEV-----GMSKE-----A      |
| AAF80974.1  | -Q INKVTRN---RCQ-YCR--LQKCFEV-----GMSKE-----A      |
| 1HRA        | -V INKVTRN---RCQ-YCR--LQKCFEV-----GMSKE-----S      |
| AAM46149.1  | -V INKVTRN---RCQ-FCR--LKKCFDV-----GMSKE-----S      |
| BAA25569.1  | -V INKSTRS---RCQ-YCR--LQKCFQV-----GMLKE-----S      |
| A56856      | -LIDRTSRN---RCQ-HCR--LQKCLAV-----GMSRD-----A       |
| NP_002934.1 | -LIDRTSRN---RCQ-HCR--LQKCLAV-----GMSRD-----A       |
| XP_217192.2 | -LIDRTSRN---RCQ-HCR--LQKCLAV-----GMSRD-----A       |
| CAB05396.1  | -LIDRTSRN---RCQ-HCR--LQKCLAV-----GMSRD-----A       |
| BAA22970.1  | -LIDRTSRN---RCQ-HCR--LQKCLAV-----GMSRD-----A       |
| NP_038674.1 | -LIDRTSRN---RCQ-HCR--LQKCLAV-----GMSRD-----A       |
| NP_599022.1 | -LIDRTSRN---RCQ-HCR--LQKCLAV-----GMSRD-----A       |
| NP_599023.1 | -LIDRTSRN---RCQ-HCR--LQKCLAV-----GMSRD-----A       |
| NP_599024.1 | -LIDRTSRN---RCQ-HCR--LQKCLAV-----GMSRD-----A       |
| CAA69930.1  | -LIDRTSRN---RCQ-HCR--LQKCLAV-----GMSRD-----A       |
| AAH58269.1  | -LIDRTNRN---RCQ-HCR--LQKCLAL-----GMSRD-----A       |
| NP_990424.1 | -LIDRTNRN---RCQ-HCR--LQKCLAL-----GMSRD-----A       |
| CAD13276.1  | -LIDRTNRN---RCQ-HCR--LQKCLAL-----GMSRD-----A       |
| XP_219749.2 | -LIDRTNRN---RCQ-HCR--LQKCLAL-----GMSRD-----A       |

|             |                                              |
|-------------|----------------------------------------------|
| I65219      | -LIDRTNRN---RCQ-HCR--LQKCLAL-----GMSRD-----A |
| RORB_RAT    | -LIDRTNRN---RCQ-HCR--LQKCLAL-----GMSRD-----A |
| NP_008845.2 | -LIDRTNRN---RCQ-HCR--LQKCLAL-----GMSRD-----A |
| RORB_HUMAN  | -LIDRTNRN---RCQ-HCR--LQKCLAL-----GMSRD-----A |
| AAB02582.1  | -PIDRTSRN---RCQ-HCR--LQKCLAL-----GMSRD-----A |
| AAD46913.1  | -PIDRTSRN---RCQ-HCR--LQKCLAL-----GMSRD-----A |
| AAH14804.1  | -PIDRTSRN---RCQ-HCR--LQKCLAL-----GMSRD-----A |
| NP_035411.1 | -PIDRTSRN---RCQ-HCR--LQKCLAL-----GMSRD-----A |
| CAA10661.1  | -PIDRTSRN---RCQ-HCR--LQKCLAL-----GMSRD-----A |
| XP_227436.2 | -PIDRTSRN---RCQ-HCR--LQKCLAL-----GMSRD-----A |
| XP_347323.1 | -PIDRTSRN---RCQ-HCR--LQKCLAL-----GMSRD-----A |
| CAD38900.1  | -PIDRTSRN---RCQ-HCR--LQKCLAL-----GMSRD-----A |
| RORG_HUMAN  | -PIDRTSRN---RCQ-HCR--LQKCLAL-----GMSRD-----A |
| NP_005051.2 | -PIDRTSRN---RCQ-HCR--LQKCLAL-----GMSRD-----A |
| AAB54059.1  | -VVDRVNRN---RCQ-YCR--LQKCLKL-----GMSRD-----A |
| AAC47163.1  | -VVDRVNRN---RCQ-YCR--LQKCLKL-----GMSRD-----A |
| AAF36970.1  | -VVDRVNRN---RCQ-YCR--LQKCLKL-----GMSRD-----A |
| NP_788301.1 | -VVDRVNRN---RCQ-YCR--LQKCLKL-----GMSRD-----A |
| NP_788302.1 | -VVDRVNRN---RCQ-YCR--LQKCLKL-----GMSRD-----A |
| NP_788303.1 | -VVDRVNRN---RCQ-YCR--LQKCLKL-----GMSRD-----A |
| XP_319750.1 | -VVDRVNRN---RCQ-YCR--LQKCLKL-----GMSRD-----A |
| AAK14384.2  | -VVDRVNRN---RCQ-YCR--LQKCLKL-----GMSRD-----A |
| HR3_GALME   | -VVDRVNRN---RCQ-YCR--LQKCLKL-----GMSRD-----A |
| AAK62804.1  | -VVDRVNRN---RCQ-YCR--LQKCLKL-----GMSRD-----A |
| HR3_MANSE   | -VVDRVNRN---RCQ-YCR--LQKCLKL-----GMSRD-----A |
| BAA89260.1  | -VVDRVNRN---RCQ-YCR--LQKCLKL-----GM-----     |
| NP_740887.1 | -VVDRVNRN---RCQ-YCR--LKKCIEL-----GMSRD-----A |
| NP_740888.1 | -VVDRVNRN---RCQ-YCR--LKKCIEL-----GMSRD-----A |
| AAK17973.1  | -VVDRVNRN---RCQ-YCR--LKKCIEL-----GMSRD-----A |
| I45067      | -VVDRVNRN---RCQ-YCR--LKKCIEL-----GMSRD-----A |
| CAE74244.1  | -IVDRVNRN---RCQ-YCR--LKKCIEL-----GMSRD-----A |
| T18848      | -VVDRVNRN---RCQ-YCR--LKKCIEL-----GMSRD-----A |
| T30318      | -VVDRVNRN---RCQ-YCR--LQKCLKL-----GMSRD-----  |
| A30226      | -SIVRINRN---RCQ-QCR--FKKCLSV-----GMSRD-----A |
| NP_665718.1 | -SIVRINRN---RCQ-QCR--FKKCLSV-----GMSRD-----A |
| AAH62047.1  | -SIVRINRN---RCQ-QCR--FKKCLSV-----GMSRD-----A |
| NP_068370.1 | -SIVRINRN---RCQ-QCR--FKKCLSV-----GMSRD-----A |
| NP_663409.1 | -SIVRINRN---RCQ-QCR--FKKCLSV-----GMSRD-----A |
| CAB53540.1  | -SIVRINRN---RCQ-QCR--FKKCLSV-----GMSRD-----A |
| 1HLZ        | -SIVRINRN---RCQ-QCR--FKKCLSV-----GMSRD-----A |
| 1A6YB       | -SIVRINRN---RCQ-QCR--FKKCLSV-----GMSRD-----A |
| A57057      | -SIMRMNRN---RCQ-QCR--FKKCLSV-----GMSRD-----A |
| NRD2_HUMAN  | -SIMRMNRN---RCQ-QCR--FKKCLSV-----GMSRD-----A |
| NP_005117.2 | -SIMRMNRN---RCQ-QCR--FKKCLSV-----GMSRD-----A |
| AAC52144.1  | -SIMRMNRN---RCQ-QCR--FKKCLSV-----GMSRD-----A |
| NRD2_MOUSE  | -SIMRMNRN---RCQ-QCR--FKKCLSV-----GMSRD-----A |
| NP_035714.2 | -SIMRMNRN---RCQ-QCR--FKKCLSV-----GMSRD-----A |
| BAC35811.1  | -SIMRMNRN---RCQ-QCR--FKKCLSV-----GMSRD-----A |
| NP_990536.1 | -SIMRMNRN---RCQ-QCR--FKKCLSV-----GMSRD-----A |
| AAA62508.1  | -SIMRMNRN---RCQ-QCR--FKKCLSV-----GMSRD-----A |
| NRD2_RAT    | -SIMRMNRN---RCQ-QCR--FKKCLSV-----GMSRD-----A |
| CAA55014.1  | -SIMRMNRN---RCQ-QCR--FKKCLSV-----GMSRD-----A |
| NP_671743.1 | -SIMRMNRN---RCQ-QCR--FKKCLSV-----GMSRD-----R |
| AAK76395.1  | -TIVRINRN---RCQ-QCR--FKKCLSV-----GMSRD-----A |
| AAK76396.1  | -PIMRINRN---RCQ-QCR--FKKCLLV-----GMSRD-----A |
| AAQ91256.1  | -TIMRINRN---RCQ-QCR--FKKCLSV-----GMSRD-----A |
| 1A6YA       | -SIVRINRN---RCQ-QCR--FKKCLSV-----GMSRD-----A |

|             |                                              |   |
|-------------|----------------------------------------------|---|
| AAG01345.1  | -SIVRINRN---RC-----                          |   |
| AAL57047.1  | -SILRINRN---RCQ-YCR--LKKCIAV-----GMSRD-----  | A |
| AAL57048.1  | -SILRINRN---RCQ-YCR--LKKCIAV-----GMSRD-----  | A |
| E75_CHOFU   | -SILRINRN---RCQ-YCR--LKKCIAV-----GMSRD-----  | A |
| AAL57049.2  | -SILRINRN---RCQ-YCR--LKKCIAV-----GMSRD-----  | A |
| BAA89262.1  | -SILRINRN---RCQ-YCR--LKKCIAV-----GMSRD-----  | A |
| E75_MANSE   | -SILRINRN---RCQ-YCR--LKKCIAV-----GMSRD-----  | A |
| NP_730321.1 | -SILRINRN---RCQ-YCR--LKKCIAV-----GMSRD-----  | A |
| NP_730322.1 | -SILRINRN---RCQ-YCR--LKKCIAV-----GMSRD-----  | A |
| E75A_DROME  | -SILRINRN---RCQ-YCR--LKKCIAV-----GMSRD-----  | A |
| E75_GALME   | -SILRINRN---RCQ-YCR--LKKCIAV-----GMSRD-----  | A |
| AAC35424.1  | -SILRINRN---RCQ-YCR--LKKCIAV-----GMSRD-----  |   |
| E75_METEN   | -SILRINRN---RCQ-YCR--LKKCIAV-----GMSRD-----  | A |
| AAS79101.1  | -SILRINRN---RCQ-YCR--LKKCIAV-----GMSRD-----  | A |
| E75C_DROME  | -SILRINRN---RCQ-YCR--LKKCIAV-----GMSRD-----  | A |
| AAB35575.1  | -MIQRVNRRN---RCQ-YCR--LKKCIAV-----GM-----    |   |
| CAE63462.1  | -LILRNNRN---RCQ-CCR--LKKCLAV-----GMSRD-----  | A |
| NP_493284.1 | -LILRNNRN---RCQ-CCR--LKKCLAV-----GMSRD-----  | A |
| CAB61000.1  | -EIKRESRN---RCQ-YCR--FKKCLDS-----GMSKD-----  | S |
| I45066      | -EIKRESRN---RCQ-YCR--FKKCLDS-----GMSKD-----  | S |
| AAG15187.1  | -EIKRESRN---RCQ-YCR--FKKCLDS-----GMSKD-----  | S |
| NP_509713.2 | -EIKRESRN---RCQ-YCR--FKKCLDS-----GMSKD-----  | S |
| CAE70540.1  | -EIRDRSRN---RCQ-YCR--FKKCLDA-----GMSKD-----  | S |
| A49070      | -LVIRLNRRN---RCQ-YCR--FKKCLSA-----GMSRD----- | S |
| AAA19975.1  | -LVIRLNRRN---RCQ-YCR--FKKCLSA-----GMSRD----- | S |
| AAF69494.1  | -LVIRLNRRN---RCQ-YCR--FKKCLSA-----GMSRD----- | S |
| NP_524195.2 | -LVIRLNRRN---RCQ-YCR--FKKCLSA-----GMSRD----- | S |
| E78A_DROME  | -LVIRLNRRN---RCQ-YCR--FKKCLSA-----GMSRD----- | S |
| CAA67384.1  | -LVIRLNRRN---RCQ-YCR--FKKCLSA-----GMSRD----- | S |
| S43435      | -LVIRLNRRN---RCQ-YCR--FKKCLSV-----GMR-----   |   |
| CAA51523.1  | -LVIRLNRRN---RCQ-YCR--FKKCLSV-----GMK-----   |   |
| XP_316596.1 | -LVIRLNRRN---RCQ-YCR--FKKCLSV-----GMSRD----- | S |
| AAK54127.1  | -HIHRLNRRN---RCQ-FCR--FRKCLAV-----GMSRD----- | S |
| AAK54129.1  | -HIHRLNRRN---RCQ-FCR--FRKCLAV-----GMSRD----- | S |
| AAF06997.1  | -HIHRLNRRN---RCQ-FCR--FRKCLAV-----GMSRD----- | S |
| A45360      | -KIQKKNRRN---KCQ-YCR--FQKCLAL-----GMSHN----- | A |
| NP_803184.1 | -KIQKKNRRN---KCQ-YCR--FQKCLAL-----GMSHN----- | A |
| NP_006229.1 | -KIQKKNRRN---KCQ-YCR--FQKCLAL-----GMSHN----- | A |
| AAP36130.1  | -KIQKKNRRN---KCQ-YCR--FQKCLAL-----GMSHN----- | A |
| AAF73406.1  | -KIQKKNRRN---KCQ-YCR--FQKCLAL-----GMSHN----- | A |
| AAO34393.1  | -KIQKKNRRN---KCQ-YCR--FQKCLAL-----GMSHN----- | A |
| AAF81095.1  | -KIQKKNRRN---KCQ-YCR--FQKCLAL-----GMSYN----- | A |
| BAA92682.1  | -KIQKKNRRN---KCQ-HCR--FQKCLAL-----GMSHN----- | A |
| BAC78903.1  | -KIQKKNRRN---KCQ-YCR--FQKCLAL-----GMSHN----- | A |
| NP_990059.1 | -KIQKKNRRN---KCQ-YCR--FQKCLSL-----GMSHN----- | A |
| AAA19972.1  | -KIQKKNRRN---KCQ-YCR--FQKCLAL-----GMSHN----- | A |
| NP_035275.1 | -KIQKKNRRN---KCQ-YCR--FQKCLAL-----GMSHN----- | A |
| AAC65985.1  | -KIQKKNRRN---KCQ-YCR--FQKCLAL-----GMSHN----- | A |
| NP_037273.1 | -KIQKKNRRN---KCQ-YCR--FQKCLAL-----GMSHN----- | A |
| CAC29088.1  | -KIQKKNRRN---KCQ-YCR--FQKCLAL-----GMSHN----- | A |
| AAL93239.1  | -KVQKKSRRN---KCQ-YCR--FQKCLAL-----GMSHN----- | A |
| AAP37029.1  | -KIQKKNRRN---KCQ-YCR--FQKCLAL-----GMSHN----- | A |
| AAA03332.1  | -KIQKKNRRN---KCQ-YCR--FQKCLAL-----GMSHN----- | A |
| AAK76392.1  | -KVQKKSRRN---KCQ-YCR--FQKCLAL-----GMSHD----- | A |
| CAC95232.1  | -KIQKKSRRN---KCQ-YCR--FQKCLLL-----GMSHD----- | A |
| AAC39168.2  | -KIQKKNRRN---K-----                          |   |
| CAD62448.1  | -KILKKNRRN---KCQ-YCR--FQKCLSL-----GMSHD----- | A |

|             |                                              |
|-------------|----------------------------------------------|
| A49289      | -KIQKKNRN---KCQ-YCR--FHKCLSV-----GMSHN-----A |
| AAH00052.1  | -KIQKKNRN---KCQ-YCR--FHKCLSV-----GMSHN-----A |
| NP_005027.2 | -KIQKKNRN---KCQ-YCR--FHKCLSV-----GMSHN-----A |
| CAA68898.1  | -KIQKKNRN---KCQ-YCR--FHKCLSV-----GMSHN-----A |
| AAF73405.1  | -KIQKKNRN---KCQ-YCR--FHKCLSV-----GMSNN-----A |
| CAA40856.1  | -KIQKKNRN---KCQ-YCR--FHKCLSV-----GMSHN-----A |
| NP_035274.2 | -KIQKKNRN---KCQ-YCR--FHKCLSV-----GMSHN-----A |
| CAD88282.1  | -KIQKKNRN---KCQ-YCR--FHKCLSV-----GMSHN-----A |
| NP_037328.1 | -KIQKKNRN---KCQ-YCR--FHKCLSV-----GMSHN-----A |
| AAF22965.1  | -KIQKKNRN---KCQ-YCR--FHKCLSA-----GMSHN-----A |
| AAF73404.1  | -KIQKKNRN---KCQ-YCR--FHKCLSA-----GMSHN-----A |
| PPAR_PHACI  | -KIQKKNRN---KCQ-YCR--FQKCLSD-----GMSHN-----A |
| PPAR_CANFA  | -KIQKKNRN---KCQ-YCR--FHKCLSV-----GMSHN-----A |
| CAA06917.1  | -KIQKKNRN---KCQ-YCR--FHKCLSV-----GMSHN-----A |
| PPAR_CAVPO  | -KIQKKNRN---KCQ-YCR--FHKCLSV-----GMSHN-----A |
| AAF80479.1  | -KIQKKNRN---KCQ-YCR--FQKCLSV-----GMSHN-----A |
| AAH60004.1  | -KIQKKNRN---KCQ-YCR--FEKCLNV-----GMSHN-----A |
| PPAR_XENLA  | -KIQKKNRN---KCQ-YCR--FEKCLNV-----GMSHN-----A |
| CAD62447.1  | -KILKKNRN---KCQ-YCR--FHKCLSV-----GMSHN-----A |
| PPAS_XENLA  | -KIQKKNRN---KCQ-YCR--FNKCLSL-----GMSHN-----A |
| AAA19971.1  | -RIHKKSRN---KCQ-YCR--FQKCLAV-----GMSHN-----A |
| AAF80170.1  | -RIHKKSRN---KCQ-YCR--FQKCLAV-----GMSHN-----A |
| AAB87481.1  | -RIHKKSRN---KCQ-YCR--FQKCLAV-----GMSHN-----A |
| AAC52134.1  | -RIHKKSRN---KCQ-YCR--FQKCLAV-----GMSHN-----A |
| AAN15206.1  | -RIHKKSRN---KCQ-YCR--FQKCLAV-----GMSHN-----A |
| CAA62152.1  | -RIHKKSRN---KCQ-YCR--FQKCLAV-----GMSHN-----A |
| AAM88773.1  | -RIHKKSRN---KCQ-YCR--FQKCLAV-----GMSHN-----A |
| AAH21798.1  | -RIHKKSRN---KCQ-YCR--FQKCLAV-----GMSHN-----A |
| NP_851367.1 | -RIHKKSRN---KCQ-YCR--FQKCLAV-----GMSHN-----A |
| PPAT_PIG    | -RIHKKSRN---KCQ-YCR--FQKCLAV-----GMSHN-----A |
| AAO66458.1  | -RIHKKSRN---KCQ-YCR--FQKCLAV-----GMSHN-----A |
| CAB61263.1  | -RIHKKSRN---KCQ-YCR--FQKCLAV-----GMSHN-----A |
| CAA73032.1  | -RIHKKSRN---KCQ-YCR--FQKCLAV-----GMSHN-----A |
| CAA73382.2  | -RIHKKSRN---KCQ-YCR--FQKCLAV-----GMSHN-----A |
| PPAT_CRIGR  | -RIHKKSRN---KCQ-YCR--FQKCLAV-----GMSHN-----A |
| PPAT_MACMU  | -RIHKKSRN---KCQ-YCR--FQKCLAV-----GMSHN-----A |
| BAA23354.1  | -RIHKKSRN---KCQ-YCR--FQKCLAV-----GMSHN-----A |
| BAA32540.1  | -RIHKKSRN---KCQ-YCR--FQKCLAV-----GMSHN-----A |
| JE0279      | -RIHKKSRN---KCQ-YCR--FQKCLAV-----GMSHN-----A |
| JE0280      | -RIHKKSRN---KCQ-YCR--FQKCLAV-----GMSHN-----A |
| NP_005028.3 | -RIHKKSRN---KCQ-YCR--FQKCLAV-----GMSHN-----A |
| NP_035276.1 | -RIHKKSRN---KCQ-YCR--FQKCLAV-----GMSHN-----A |
| NP_037256.1 | -RIHKKSRN---KCQ-YCR--FQKCLAV-----GMSHN-----A |
| NP_056953.2 | -RIHKKSRN---KCQ-YCR--FQKCLAV-----GMSHN-----A |
| AAL05261.1  | -RIHKKSRN---KCQ-YCR--FQKCLAV-----GMSHN-----A |
| AAL05262.1  | -RIHKKSRN---KCQ-YCR--FQKCLAV-----GMSHN-----A |
| AAL05267.1  | -RIHKKSRN---KCQ-YCR--FQKCLAV-----GMSHN-----A |
| PPAT_RABIT  | -RIHKKSRN---KCQ-YCR--FQKCLAV-----GMSHN-----A |
| AAO19445.1  | -RIHKKSRN---KCQ-YCR--FQKCLAV-----GMSHN-----A |
| AAG60685.2  | -RIHKKSRN---KCQ-YCR--FQKCLAV-----GMSHN-----A |
| AAL87700.1  | -RIHKKSRN---KCQ-YCR--FQKCLAV-----GMPHN-----A |
| CAB61238.1  | -RIHKKGRN---KCQ-YCR--FQKCLAV-----GMSHN-----A |
| AAN75018.1  | -RIHKKSRN---KCQ-YCR--FQKCLAV-----GMSHN-----A |
| AAC39169.1  | -RIHKKSRN---KCQ-YCR--FQKCLAV-----GMSHN-----A |
| AAO13014.1  | -RIHKKSRN---KCQ-YCR--FQKCLAV-----GMSHN-----A |
| AAA62110.1  | -RIHKKSRN---KCQ-YCR--FQKCLAV-----GMSHN-----A |
| BAA18949.1  | -RIHKKSRN---KCQ-YCR--FQKCLAV-----GMSHN-----A |

|             |                                              |
|-------------|----------------------------------------------|
| AAH60474.1  | -RIHKKSRN---KCQ-FCR--FQKCLAV-----GMSHN-----A |
| PPAT_XENLA  | -RIHKKSRN---KCQ-FCR--FQKCLAV-----GMSHN-----A |
| CAC34402.1  | -RIHKKSRN---KCQ-FCR--FQKCLAV-----GMSHN-----A |
| CAB51396.1  | -RIHKKSRN---KCQ-YCR--FQKCLNV-----GMSHN-----A |
| CAB51618.2  | -RIHKKSRN---KCQ-YCR--FQKCLNV-----GMSHN-----A |
| CAD62449.1  | -RIHKKSRN---KCQ-YCR--FQKCLNV-----GMSHN-----A |
| CAC02968.1  | -RIHKKSRN---KCQ-YCR--FQKCLLV-----GMSHD-----A |
| CAC02969.1  | -RIHKKSRN---KCQ-YCR--FQKCLLV-----GMSHD-----A |
| CAC95230.1  | -RIHKKSRN---KCQ-YCR--FQKCLLV-----GMSHD-----A |
| AAP79434.1  | -RIHKKSRN---KCQ-YCR--FQ-----                 |
| NP_035435.1 | -LIDKRQRN---RCQ-YCR--YQKCLAM-----GMKRE-----A |
| NP_036937.1 | -LIDKRQRN---RCQ-YCR--YQKCLAM-----GMKRE-----A |
| AAB36777.1  | -LIDKRQRN---RCQ-YCR--YQKCLAM-----GMKRE-----A |
| AAC95154.1  | -LIDKRQRN---RCQ-YCR--YQKCLAM-----GMKRE-----A |
| NP_002948.1 | -LIDKRQRN---RCQ-YCR--YQKCLAM-----GMKRE-----A |
| AAH63827.1  | -LIDKRQRN---RCQ-YCR--YQKCLAM-----GMKRE-----A |
| AAG02188.1  | -LIDKRQRN---RCQ-YCR--YQKCLAM-----GMKRE-----A |
| C41977      | -MIDKRQRN---RCQ-YCR--YQKCLAM-----GMKRE-----A |
| RXRA_XENLA  | -MIDKRQRN---RCQ-YCR--YQKCLAM-----GMKRE-----A |
| NP_571292.2 | -QIDKRQRN---RCQ-YCR--YQKCLAM-----GMKRE-----A |
| RXRA_BRARE  | -QIDKRQRN---RCQ-YCR--YQKCLAM-----GMKRE-----A |
| 1DSZB       | -LIDKRQRN---RCQ-YCR--YQKCLAM-----GMKRE-----A |
| 2120366D    | -MIDKRQRN---RCQ-YCR--YQKCLAM-----GMKRE-----A |
| NP_571228.1 | -MIDKRQRN---RCQ-YCR--YQKCLAM-----GMKRE-----A |
| 1RXR        | -LIDKRQRN---RCQ-YCR--YQKALAM-----GMKRE-----A |
| NP_033133.1 | -LIDKRQRN---RCQ-YCR--YQKCLVM-----GMKRE-----A |
| S26670      | -LIDKRQRN---RCQ-YCR--YQKCLVM-----GMKRE-----A |
| AAB27245.1  | -LIDKRQRN---RCQ-YCR--YQKCLVM-----GMKRE-----A |
| CAA11109.1  | -LIDKRQRN---RCQ-YCR--YQKCLVM-----GMKRE-----A |
| XP_341152.1 | -LIDKRQRN---RCQ-YCR--YQKCLVM-----GMKRE-----A |
| NP_008848.1 | -LIDKRQRN---RCQ-YCR--YQKCLVM-----GMKRE-----A |
| NP_990625.1 | -LIDKRQRN---RCQ-YCR--YQKCLAM-----GMKRE-----A |
| RXRG_XENLA  | -LIDKRQRN---RCQ-YCR--YQKCLAM-----GMKRE-----A |
| CAD45002.1  | -LVDKRQRN---RCQ-YCR--YQKCLAM-----GMKRE-----A |
| NP_571313.1 | -LVDKRQRN---RCQ-YCR--YQKCLAM-----GMKRE-----A |
| BAB83838.1  | -TVDKRQRN---RCQ-YCR--YQKCLAM-----GMKRE-----A |
| CAA60792.1  | -IVDKRQRN---RCQ-YCR--YQKCLAT-----GMKRE-----A |
| S47633      | -IVDKRQRN---RCQ-YCR--YQKCLAT-----GMKRE-----A |
| 1BY4        | -LIDKRQRN---RCQ-YCR--YQKCLAM-----GMKRE-----A |
| RXRB_RAT    | -TVDKRQRN---RCQ-YCR--YQKCLAT-----GMKRE-----A |
| XP_342096.1 | -TVDKRQRN---RCQ-YCR--YQKCLAT-----GMKRE-----A |
| S26669      | -TVDKRQRN---RCQ-YCR--YQKCLAT-----GMKRE-----A |
| NP_035436.1 | -TVDKRQRN---RCQ-YCR--YQKCLAT-----GMKRE-----A |
| CAE83933.1  | -TVDKRQRN---RCQ-YCR--YQKCLAT-----GMKRE-----A |
| D41727      | -TVDKRQRN---RCQ-YCR--YQKCLAT-----GMKRE-----A |
| AAH19432.1  | -TVDKRQRN---RCQ-YCR--YQKCLAT-----GMKRE-----A |
| A41651      | -TVDKRQRN---RCQ-YCR--YQKCLAT-----GMKRE-----A |
| A34418      | -TVDKRQRN---RCQ-YCR--YQKCLAT-----GMKRE-----A |
| AAA40081.2  | -TVDKRQRN---RCQ-YCR--YQKCLAT-----GMKRE-----A |
| NP_068811.1 | -TVDKRQRN---RCQ-YCR--YQKCLAT-----GMKRE-----A |
| S37781      | -TVDKRQRN---RCQ-YCR--YQKCLAT-----GMKRE-----A |
| AAL14642.1  | -TVDKRQRN---RCQ-YCR--YQKCLAT-----GMKRE-----A |
| AAA60293.1  | -TVDKRQRN---RCQ-YCR--YQKCLAT-----GMKRE-----A |
| AAH54649.1  | -LVDKRQRN---RCQ-YCR--YQKCLAM-----GMKRE-----V |
| NP_571350.1 | -LVDKRQRN---RCQ-YCR--YQKCLAM-----GMKRE-----V |
| 2NLLA       | -LIDKRQRN---RCQ-YCR--YQKCLAM-----GM-----     |
| 1R0NA       | -LIDKRQRN---RCQ-YCR--YQKCLAM-----GMKRE-----A |

|             |                                                    |
|-------------|----------------------------------------------------|
| AAM18898.1  | -VIDKRQRN---RCQ-YCR--YQKCLAM-----GMKRE-----A       |
| AAM46151.1  | -VIDKRQRN---RCQ-YCR--YQKCLAM-----GMKREDVQDQRQSGNSA |
| BAA82618.1  | -VIDKRQRN---RCQ-YCR--YQKCLAM-----GMKRE-----A       |
| CAA36827.1  | -IIDKRQRN---RCQ-YCR--YQKCLTC-----GMKRE-----A       |
| NP_476781.1 | -IIDKRQRN---RCQ-YCR--YQKCLTC-----GMKRE-----A       |
| A35872      | -IIDKRQRN---RCQ-YCR--YQKCLTC-----GMKRE-----A       |
| 1R00        | -IIDKRQRN---RCQ-YCR--YQKCLTC-----GMKRE-----A       |
| AAG01569.1  | -IIDKRQRN---RCQ-YCR--YQKCLAC-----GMKRE-----A       |
| BAD12053.1  | -IIDKRQRN---RCQ-YCR--YQKCLAC-----GMKRE-----A       |
| AAC15589.1  | -VVDKRQRN---RCQ-YCR--YQKCLMC-----GMKRE-----A       |
| AAM54495.1  | -IIDKRQRN---RCQ-YCR--YQKCLAC-----GMKRE-----A       |
| USP_MANSE   | -IIDKRQRN---RCQ-YCR--YQKCLAC-----GMKRE-----A       |
| BAC53670.1  | -IIDKRQRN---RCQ-YCR--YQKCLAC-----GMKRE-----A       |
| USP_BOMMO   | -IIDKRQRN---RCQ-YCR--YQKCLAC-----GMKRE-----A       |
| AAM54497.1  | -IIDKRQRN---RCQ-YCR--YQKCLAC-----GMKRE-----A       |
| USP_CHOFU   | -IIDKRQRN---RCQ-YCR--YQKCLAC-----GMKRE-----A       |
| AAB35576.1  | -VIDKKQRN---RCQ-YCR--YQKCLNC-----GM-----           |
| AAC03056.1  | -VIDKKQRN---RCQ-YCR--YQKCLNC-----GMKRE-----A       |
| AAC15588.1  | -IIDKRQRN---RCQ-YCR--YQKCLAC-----GMKRE-----A       |
| CAB75361.1  | -IIDKRQRN---RCQ-YCR--YQKCLNM-----GMKRE-----A       |
| AAF00981.1  | -IIDKRQRN---RCQ-YCR--YQKCLAM-----GMKRE-----A       |
| AAQ55293.1  | -IIDKRQRN---RCQ-YCR--YQKCLAM-----GMKRE-----A       |
| AAF73057.1  | -IIDKRQRN---RCQ-YCR--YQKCLAM-----GMKRE-----A       |
| AAC32789.2  | -TIDKRQRN---RCQ-YCR--YQKCLTM-----GMKRE-----A       |
| AAL86461.1  | -MIDKRQRN---RCQ-YCR--YMKCLSM-----GMKRE-----A       |
| AAG24886.1  | -TIDKRQRN---RCQ-YCR--YQKCLAC-----GMKRE-----A       |
| AAG24887.1  | -TIDKRQRN---RCQ-YCR--YQKCLAC-----GMKRE-----A       |
| AAF19033.1  | -TIDKRQRN---RCL-YCR--YQKCLAC-----GMKRE-----A       |
| XP_320944.1 | -TIDKRQRN---RCQ-YCR--YQKCLAC-----GMKRE-----A       |
| AAM08268.1  | -IIDKRQRN---RCQ-YCR--YRKCQSM-----GMKRE-----A       |
| AAD33428.1  | -QIDKRLRN---RCQ-YCR--YQKCLRA-----GMRRE-----A       |
| AAD45325.1  | -QIDKRLRN---RCQ-YCR--YQKCLRA-----GMRRE-----A       |
| AAD16119.1  | -PVDRRKRT---RCQ-HCR--FEQCLAK-----GMKKE-----A       |
| AAL29199.1  | -QIDKNNRI---RCQ-FCR--FQKCLSL-----GMLKE-----A       |
| AAL29194.1  | -EVNQISRN---RCQ-YCR--FNKCLAQ-----GMLKE-----A       |
| AAA36763.1  | -PVDKRRRN---RCQ-FCR--FQKCLAV-----GMVKE-----V       |
| NR41_CANFA  | -PVDKRRRN---RCQ-FCR--FQKCLAV-----GMVKE-----V       |
| NP_002126.2 | -PVDKRRRN---RCQ-FCR--FQKCLAV-----GMVKE-----V       |
| AAP36590.1  | -PVDKRRRN---RCQ-FCR--FQKCLAV-----GMVKE-----V       |
| NP_034574.1 | -PVDKRRRN---RCQ-FCR--FQKCLAV-----GMVKE-----V       |
| NR41_RAT    | -PVDKRRRN---RCQ-FCR--FQKCLAV-----GMVKE-----V       |
| NP_077364.1 | -PVDKRRRN---RCQ-FCR--FQKCLAV-----GMVKE-----V       |
| CAA42718.1  | -PVDKRRRN---RCQ-FCR--FQKCLAV-----GMVKE-----V       |
| 1CIT        | -PVDKRRRN---RCQ-FCR--FQKCLAV-----GMVKE-----V       |
| AAH56025.1  | -PVDKRRRN---RCQ-FCR--FQKCLAV-----GMVKE-----V       |
| NR42_XENLA  | -PVDKRRRN---RCQ-FCR--FQKCLVV-----GMVKE-----V       |
| NP_006177.1 | -PVDKRRRN---RCQ-YCR--FQKCLAV-----GMVKE-----V       |
| NP_775263.1 | -PVDKRRRN---RCQ-YCR--FQKCLAV-----GMVKE-----V       |
| NP_775264.1 | -PVDKRRRN---RCQ-YCR--FQKCLAV-----GMVKE-----V       |
| NP_775265.1 | -PVDKRRRN---RCQ-YCR--FQKCLAV-----GMVKE-----V       |
| AAB33999.1  | -PVDKRRRN---RCQ-YCR--FQKCLAV-----GMVKE-----V       |
| NP_038641.1 | -PVDKRRRN---RCQ-YCR--FQKCLAV-----GMVKE-----V       |
| NP_062201.2 | -PVDKRRRN---RCQ-YCR--FQKCLAV-----GMVKE-----V       |
| NR42_RAT    | -PVDKRRRN---RCQ-YCR--FQKCLAV-----GMVKE-----V       |
| I84692      | -PVDKRRRN---RCQ-YCR--FQKCLAV-----GMVKE-----V       |
| AAC53154.1  | -PVDKRRRN---RCQ-YCR--FQKCLAV-----GMVKE-----V       |
| BAA75461.1  | -PVDKRRRN---RCQ-YCR--FQKCLAV-----GMVKE-----V       |

AAA42058.1 -PVDKRRRN---RCQ-YCR--FQKCLAV-----GMVKE-----V  
CAC27783.1 -PVDKRRRN---RCQ-FCR--FQKCLVV-----GMVRE-----V  
NP\_008912.2 -PVDKRRRN---RCQ-YCR--FQKCLSV-----GMVKE-----V  
NP\_056558.1 -PVDKRRRN---RCQ-YCR--FQKCLSV-----GMVKE-----V  
NP\_059048.1 -PVDKRRRN---RCQ-YCR--FQKCLSV-----GMVKE-----V  
NP\_113816.1 -PVDKRRRN---RCQ-YCR--FQKCLSV-----GMVKE-----V  
NP\_775291.1 -PVDKRRRN---RCQ-YCR--FQKCLSV-----GMVKE-----V  
NP\_775292.1 -PVDKRRRN---RCQ-YCR--FQKCLSV-----GMVKE-----V  
NR43\_HUMAN -PVDKRRRN---RCQ-YCR--FQKCLSV-----GMVKE-----V  
S71930 -PVDKRRRN---RCQ-YCR--FQKCLSV-----GMVKE-----V  
BAA11419.1 -PVDKRRRN---RCQ-YCR--FQKCLSV-----GMVKE-----V  
CAA09763.1 -PVDKRRRN---RCQ-YCR--FQKCLSV-----GMVKE-----V  
CAA09764.1 -PVDKRRRN---RCQ-YCR--FQKCLSV-----GMVKE-----V  
AAF05623.1 -PVDKRRRN---RCQ-YCR--FQKCLSV-----GMVKE-----V  
AAB36006.1 -PVDKRRRN---RCQ-YCR--FQKCLSV-----GMVKE-----V  
AAB02581.1 -PVDKRRRN---RCQ-YCR--FQKCLSV-----GMVKE-----V  
CAA05172.1 -PVDKRRRN---RCQ-FCR--FQKCLVV-----GMVKE-----V  
NP\_788079.1 -PVDKRRRN---RCQ-FCR--FQKCLVV-----GMVKE-----V  
CAA75690.1 -PVDKRRRN---RCQ-FCR--FQKCLVV-----GMVKE-----V  
HR38\_DROME -PVDKRRRN---RCQ-FCR--FQKCLVV-----GMVKE-----V  
NP\_477119.1 -PVDKRRRN---RCQ-FCR--FQKCLVV-----GMVKE-----V  
AAC46926.1 -PVDKRRRN---RCQ-FCR--FQKCLVV-----GMVKE-----V  
S58238 -PVDKRRRN---RCQ-FCR--FQKCLVV-----GMVKE-----V  
HR38\_BOMMO -PVDKRRRN---RCQ-FCW--FQKCLAV-----GMVKE-----V  
AAF23095.1 -PVDKRRRN---RCQ-FCR--FQKCLAV-----GMVKE-----V  
XP\_317123.1 -PVDKRRRN---RCQ-FCR--FQKCLAV-----GMVKE-----V  
G88408 -PIDKRYRS---RCQ-YCR--YQKCLEV-----GMVKE-----I  
NP\_497731.1 -PIDKRYRS---RCQ-YCR--YQKCLEV-----GMVKE-----I  
AAA96984.1 -PIDKRYRS---RCQ-YCR--YQKCLEV-----GMVKE-----I  
AAG15119.1 -PIDKRYRS---RCQ-YCR--YQKCLEV-----GMVKE-----I  
CAE64932.1 -PIDKRYRS---RCQ-YCR--FQKCLEV-----GMVKE-----I  
AAC61752.1 -TIDKFRFS---RCQ-YCR--FQKCIAV-----GMVKE-----V  
AAC80008.1 -DTDKKS RN---RCQ-YCR--FQKCVQV-----GMKPE-----A  
CAD57002.1 -AIEKHTRN---RCQ-YCR--LQKCIAN-----GMRKE-----A  
7UP2\_DROME -PIDQHHRN---QCQ-YCR--LKKCLKM-----GMRRE-----A  
NP\_731681.1 -PIDQHHRN---QCQ-YCR--LKKCLKM-----GMRRE-----A  
NP\_524325.1 -PIDQHHRN---QCQ-YCR--LKKCLKM-----GMRRE-----A  
AAG53940.1 -PIDQHHRN---QCQ-FCR--LRKCLKM-----GMRRE-----A  
XP\_312394.1 -PIDQHHRN---QCQ-FCR--LRKCLKM-----GMRRE-----A  
BAB55582.1 -PIDQHHRN---QCQ-FCR--LRKCLKM-----GMRRE-----A  
BAB88907.1 -PIDQHHRN---QCQ-FCR--LRKCLKM-----GMRRE-----G  
AAA19853.1 -PIDQHHRN---QCQ-YCR--LKKCLKV-----GMRRE-----A  
AAH56574.1 -PIDQHHRN---QCQ-YCR--LKKCLKV-----GMRRE-----A  
XP\_346612.1 -PIDQHHRN---QCQ-YCR--LKKCLKV-----GMRRE-----A  
NP\_786998.1 -PIDQHHRN---QCQ-YCR--LKKCLKV-----GMRRE-----A  
AAD42224.1 -PIDQHHRN---QCQ-YCR--LKKCLKV-----GMRRE-----A  
NP\_571255.1 -PIDQHHRN---QCQ-YCR--LKKCLKV-----GMRRE-----A  
NP\_112392.1 -PIDQHHRN---QCQ-YCR--LKKCLKV-----GMRRE-----A  
NP\_005645.1 -PIDQHHRN---QCQ-YCR--LKKCLKV-----GMRRE-----A  
NP\_034281.1 -PIDQHHRN---QCQ-YCR--LKKCLKV-----GMRRE-----A  
CAA34277.1 -PIDQHHRN---QCQ-YCR--LKKCLKV-----GMRRE-----A  
AAA21479.1 -PIDQHHRN---QCQ-YCR--LKKCLKV-----GMRRE-----A  
NP\_989752.1 -PIDQHHRN---QCQ-YCR--LKKCLKV-----GMRRE-----A  
NP\_542956.1 -PIDQHHRN---QCQ-YCR--LKKCLKV-----GMRRE-----A  
NP\_066285.1 -PIDQHHRN---QCQ-YCR--LKKCLKV-----GMRRE-----A  
CAA54096.1 -PIDQHHRN---QCQ-YCR--LKKCLKV-----GMRRE-----A  
AAP82999.1 -PIDQHHRN---QCQ-YCR--LKKCLKV-----GMRRE-----A

|             |                                              |
|-------------|----------------------------------------------|
| NP_776827.1 | -PIDQHHRN---QCQ-YCR--LKKCLKV-----GMRRE-----A |
| AAB37686.1  | -PIDQHHRN---QCQ-YCR--LKKCLKV-----GMRRE-----A |
| AAH44975.1  | -PIDQHHRN---QCQ-YCR--LKKCLKV-----GMRRE-----A |
| NP_571258.1 | -PIDQHHRN---QCQ-YCR--LKKCLKV-----GMRRE-----A |
| AAH56748.1  | -PVDQHHRN---QCQ-YCR--LKKCLKV-----GMRRE-----A |
| AAH65651.1  | -PVDQHHRN---QCQ-YCR--LKKCLKV-----GMRRE-----  |
| AAO61416.1  | -PIDQHHRN---QCQ-YCR--LKKCLKM-----GMRRE-----A |
| NP_571261.1 | -PIDQHHRN---QCQ-YCR--LKKCLKV-----GMRRE-----A |
| S20617      | -PIDQHHRN---QCQ-YCR--LKKCLKV-----GMRRE-----  |
| A46358      | -PIDQHHRN---QCQ-YCR--LKKCLKM-----GMRRE-----A |
| AAL29200.1  | -PIDQHHRN---QCQ-YCR--LRKCKMV-----GMRRE-----A |
| AAH02669.2  | -QIDQHHRN---QCQ-YCR--LKKCFRV-----GMRKE-----A |
| NP_005225.2 | -QIDQHHRN---QCQ-YCR--LKKCFRV-----GMRKE-----A |
| AAH63018.1  | -QIDQHHRN---QCQ-YCR--LKKCFRV-----GMRKE-----A |
| S02709      | -QIDQHHRN---QCQ-YCR--LKKCFRV-----GMRKE-----A |
| EAR2_MOUSE  | -QIDQHHRN---QCQ-YCR--LKKCFRV-----GMRKE-----A |
| NP_034280.1 | -QIDQHHRN---QCQ-YCR--LKKCFRV-----GMRKE-----A |
| AAH08138.1  | -QIDQHHRN---QCQ-YCR--LKKCFRV-----GMRKE-----A |
| NP_620813.1 | -QIDQHHRN---QCQ-YCR--LKKCFRV-----GMRKE-----A |
| AAH56043.1  | -QIDQHHRN---QCQ-YCR--LKKCFRV-----GMRKE-----A |
| AAH65330.1  | -QIDQHHRN---QCQ-YCR--LKKCFRV-----GMRKE-----A |
| AAH65332.1  | -QIDQHHRN---QCQ-YCR--LKKCFRV-----GMRKE-----A |
| NP_492181.1 | -AIDVQHRN---QCQ-YCR--LTKCIRM-----GMRKE-----G |
| AAL29198.1  | -PVNKRYRN---SCQ-YCR--MKKCLRV-----GMKRE-----G |
| A36738      | -IINKHHRN---RCQ-YCR--LQRCIAF-----GMKQD-----S |
| NP_003288.1 | -IINKHHRN---RCQ-YCR--LQRCIAF-----GMKQD-----S |
| BAB60786.1  | -IINKHHRN---RCQ-YCR--LQRCIAF-----GMKQD-----S |
| TR2_HUMAN   | -IINKHHRN---RCQ-YCR--LQRCIAF-----GMKQD-----S |
| NP_665723.1 | -IINKHHRN---RCQ-YCR--LQRCIAF-----GMKQD-----S |
| AAC53253.1  | -VMNKHHRN---RCQ-YCR--LQRCIAF-----GMKQD-----S |
| NP_035759.2 | -VINKHHRN---RCQ-YCR--LQRCIAF-----GMKQD-----S |
| AAC29502.1  | -VINKHHRN---RCQ-YCR--LQRCIAF-----GMKQD-----S |
| NP_989455.1 | -VINKHHRN---RCQ-YCR--LQRCIAF-----GMKQD-----S |
| AAB81178.1  | -VINKHYRN---RCQ-YCR--LQRCMSL-----GMKQD-----S |
| AAB69281.1  | -IINKHHRN---RCQ-YCR--LQRCIAL-----GMKQD-----S |
| NP_059019.1 | -IINKHHRN---RCQ-FCR--LKKCLEM-----GMKME-----S |
| TR4_MOUSE   | -IINKHHRN---RCQ-FCR--LKKCLEM-----GMKME-----S |
| I54075      | -IINKHHRN---RCQ-FCR--LKKCLEM-----GMKME-----S |
| I59309      | -IINKHHRN---RCQ-FCR--LKKCLEM-----GMKME-----S |
| NP_003289.2 | -IINKHHRN---RCQ-FCR--LKKCLEM-----GMKME-----S |
| TR4_HUMAN   | -IINKHHRN---RCQ-FCR--LKKCLEM-----GMKME-----S |
| AAH51670.1  | -IINKHHRN---RCQ-FCR--LKKCLEM-----GMKME-----S |
| AAM46150.1  | -PINKHHRN---RCQ-YCR--LQKCLSV-----GMRSE-----S |
| AAB19174.1  | -QIIKHNRN---RCQ-YCR--LQKCLDM-----GMKSD-----S |
| AAB19176.1  | -QIIKHNRN---RCQ-YCR--LQKCLDM-----GMK-----    |
| AAQ55494.1  | -PVTKFHRN---RCQ-YCR--LRKCLSM-----GMRSE-----S |
| AAQ55495.1  | -PVTKFHRN---RCQ-YCR--LRKCLSM-----GMRSE-----S |
| NH41_CAEEEL | -PVTKFHRN---RCQ-YCR--LRKCLSM-----GMRSE-----S |
| AAC43032.1  | -PVTKFHRN---RCQ-YCR--LRKCLTM-----GMRSE-----C |
| AAC46924.1  | -EVTKHHRN---RCQ-FCR--LQKCLAS-----GMRSD-----S |
| NP_730636.1 | -EVTKHHRN---RCQ-FCR--LQKCLAS-----GMRSD-----S |
| HR78_DROME  | -EVTKHHRN---RCQ-FCR--LQKCLAS-----GMRSD-----S |
| NP_524203.2 | -EVTKHHRN---RCQ-FCR--LQKCLAS-----GMR-----T   |
| CAA06690.1  | -EVTKHHRN---RCQ-YCR--LQKCLAC-----GMRSD-----S |
| XP_317069.1 | -EVTKHHRN---RCQ-YCR--LQKCLAC-----GMRSD-----S |
| AAL83722.1  | -EVTKHHRN---RCQ-YCR--LQKCLAC-----GMRSD-----  |
| AAL29196.1  | -PINKVHRN---RCQ-RCR--LKKCLTM-----GMKRE-----A |

|             |                                              |
|-------------|----------------------------------------------|
| AAL29197.1  | -PINKVHRN---RCQ-RCR--LKKCLTM-----GMKRE-----A |
| AAL29201.1  | -PVDKVHRN---RCQ-RCR--LNKCLTM-----GMKKE-----A |
| AAH30600.1  | -VMSRKQRN---RCQ-YCR--LLKCLQM-----GMNRK-----A |
| NP_201592.1 | -VMSRKQRN---RCQ-YCR--LLKCLQM-----GMNRK-----A |
| NP_001480.2 | -VMSRKQRN---RCQ-YCR--LLKCLQM-----GMNRK-----A |
| NP_034394.1 | -VMSRKQRN---RCQ-YCR--LLKCLQM-----GMNRK-----A |
| NR61_HUMAN  | -VMSRKQRN---RCQ-YCR--LLKCLQM-----GMNRK-----A |
| XP_342428.1 | -VMSRKQRN---RCQ-YCR--LLKCLQM-----GMNRK-----A |
| NP_201591.1 | -VMSRKQRN---RCQ-YCR--LLKCLQM-----GMNRK-----T |
| AAB06335.1  | -VMSRKQRN---RCQ-YCR--LLKCLQM-----GMNRK-----A |
| NP_571331.1 | -EMSRKQRN---RCQ-YCR--LLKCLQM-----GMNRK-----A |
| AAC60126.1  | -VMSRKQRN---RCQ-YCR--LLKCLQM-----GMNRK-----A |
| CAE30390.1  | -QMSRKQRN---RCQ-YCR--LQKCLQM-----GMNRK-----A |
| AAM95452.1  | -VMSRK-----                                  |
| AAL50350.1  | -EITKAQRN---RCQ-YCR--FKKCIEQ-----GMVLQ-----A |
| AAM54498.1  | -EITKAQRN---RCQ-YCR--FKKCIEQ-----GMVLQ-----A |
| AAD38900.1  | -EITKAQRN---RCQ-YCR--FKKCIEQ-----GMVLQ-----A |
| CAA22836.1  | -EITKAQRN---RCQ-YCR--FKKCIEQ-----GMVLQ-----A |
| NP_569967.2 | -EITKAQRN---RCQ-YCR--FKKCIEQ-----GMVLQ-----A |
| NP_996331.1 | -EITKAQRN---RCQ-YCR--FKKCIEQ-----GMVLQ-----A |
| XP_318161.1 | -EITKAQRN---RCQ-YCR--FKKCIEQ-----GMVLQ-----A |
| CAA06670.1  | -EITKAQRK---RCP-YCR--FKKCIEQ-----GMVLQ-----A |
| AAG15181.1  | -EIDKQNRN---RCQ-SCR--FRKCISK-----GMLTE-----A |
| NP_510536.1 | -EIDKQNRN---RCQ-SCR--FRKCISK-----GMLTE-----A |
| AAG15183.1  | -EIDKQNRN---RCQ-SCR--FRKCISK-----GMLTE-----A |
| CAE63296.1  | -EIDKQNRN---RCQ-SCR--FRKCISK-----GMLTE-----A |
| NP_491689.2 | -AANRGVRT---RCQ-ACR--FAKCLAV-----GMNRD-----N |
| T34026      | -AANRGVRT---RCQ-ACR--FAKCLAV-----GMNRD-----N |
| NHR2_CAEEEL | -AANRGVRT---RCQ-ACR--FAKCLAV-----GMNRD-----N |
| AAK17971.1  | -AANRGVRT---RCQ-ACR--FAKCLAV-----GMNRD-----N |
| AAK17972.1  | -AANRGVRT---RCQ-ACR--FAKCLAV-----GMNRD-----N |
| CAE60452.1  | -TINRGIRT---RCQ-ACR--YARCLAV-----GMNKE-----S |
| 1HCP        | -TIDKNRRK---SCQ-ACR--LRKCYEV-----GMMKGG----- |
| AAA58461.1  | -TIDKNRRK---SCQ-ACR--LRKCYEV-----GMMKGD----- |
| AAD31032.1  | -TIDRNRK---SCQ-ACR--LRKCYEV-----GMMKGG-----  |
| AAL82743.1  | -TIDRNRK---SCQ-ACR--LRKCYEV-----GMMKGG-----  |
| ESR1_SPAAU  | -TIDRNRK---SCQ-ACR--LRKCYEV-----GMMKGG-----  |
| ESR1_PAGMA  | -TIDRNRK---SCQ-ACR--LRKCYEV-----GMMKGG-----  |
| AAG44622.2  | -TIDRNRK---SCQ-ACR--LRKCYEV-----GMMKGG-----  |
| AAO66473.1  | -TIDRNRK---SCQ-ACR--LRKCYEV-----GMMKGG-----  |
| BAB85622.1  | -TIDRNRK---SCQ-ACR--LRKCYEV-----GMMKGG-----  |
| AAG48341.1  | -TIDRNRK---SYQ-ACR--LRKCYEV-----GMMKGG-----  |
| AAP72178.1  | -TIDRNRK---SCQ-ACR--LRKCYEV-----GMMKGG-----  |
| BAC76957.1  | -TIDRNRK---SCQ-ACR--LRKCYEV-----GMMKGG-----  |
| ESR1_ORYLA  | -TIDRNRK---SCQ-ACR--LRKCYEV-----GMMKGG-----  |
| AAR82891.1  | -TIDKNRRK---SCQ-ACR--LRKCYEV-----GMMKGG----- |
| ESR1_ORENI  | -TIDKNRRK---SCQ-ACR--LRKCYEV-----GMMKGG----- |
| ESR1_OREAU  | -TIDKNRRK---SCQ-ACR--LRKCYEV-----GMMKGG----- |
| ESR1_SHEEP  | -TIDKNRRK---SCQ-ACR--LRKCY-----              |
| NP_990514.1 | -TIDKNRRK---SCQ-ACR--LRKCYEV-----GMMKGG----- |
| QRCHE       | -TIDKNRRK---SCQ-ACR--LRKCYEV-----GMMKGG----- |
| ESR1_POEGU  | -TIDKNRRK---SCQ-ACR--LRKCYEV-----GMMKGG----- |
| AAN63674.1  | -TIDKNRRK---SCQ-ACR--LRKCYEV-----GMMKGG----- |
| BAB79436.1  | -TIDKNRRK---SCQ-ACR--LRKCYEV-----GMMKGG----- |
| BAD08348.1  | -TIDKNRRK---SCQ-ACR--LRKCYEV-----GMMKGG----- |
| 1HCQ        | -TIDKNRRK---SCQ-ACR--LRKCYEV-----GMMKGG----- |
| AAD47137.1  | -TIDKNRRK---SCQ-ACR--LRKCYEV-----GMMKGG----- |

|             |                                              |
|-------------|----------------------------------------------|
| S64737      | -TIDKNRRK---SCQ-ACR--LRKCYEV-----GMMKGG----- |
| AAD52984.1  | -TIDKNRRK---SCQ-ACR--LRKCYEV-----GMMKGG----- |
| CAE45969.1  | -TIDKNRRK---SCQ-ACR--LRKCYEV-----GMMKGG----- |
| NP_000116.1 | -TIDKNRRK---SCQ-ACR--LRKCYEV-----GMMKGG----- |
| ESR1_HUMAN  | -TIDKNRRK---SCQ-ACR--LRKCYEV-----GMMKGG----- |
| CAC42096.1  | -TIDKNRRK---SCQ-ACR--LRKCYEV-----GMMKGG----- |
| AAK52104.1  | -TIDKNRRK---SCQ-ACR--LRKCYEV-----GMMKGG----- |
| AAS46251.1  | -TIDKNRRK---SCQ-ACR--LRKCYEV-----GMMKGG----- |
| ESR1_PIG    | -TIDKNRRK---SCQ-ACR--LRKCYEV-----GMMKGG----- |
| ESR1_HORSE  | -TIDKNRRK---SCQ-ACR--LRKCYEV-----GMMKGG----- |
| CAA43411.1  | -TIDKNRRK---SCQ-ACR--LRKCYEV-----GMMKGG----- |
| NP_036821.1 | -TIDKNRRK---SCQ-ACR--LRKCYEV-----GMMKGG----- |
| NP_031982.1 | -TIDKNRRK---SCQ-ACR--LRKCYEV-----GMMKGG----- |
| ESR1_MESAU  | -TIDKNRRK---SCQ-ACR--LRKCYEV-----GMMKGG----- |
| AAR23923.1  | -TIDKNRRK---SCQ-ACR--LRKCYEV-----GMMKGG----- |
| BAB79437.1  | -TIDKNRRK---SCQ-ACR--LRKCYEV-----GMMKGG----- |
| AAQ84782.1  | -TIDKNRRK---SCQ-ACR--LRKCYEV-----GMMKGG----- |
| AAQ84784.1  | -TIDKNRRK---SCQ-ACR--LRKCYEV-----GMMKGG----- |
| NP_988866.1 | -TIDKNRRK---SCQ-ACR--LRKCYEV-----GMMKGG----- |
| ESR1_XENLA  | -TIDKNRRK---SCQ-ACR--LRKCYEV-----GMMKGG----- |
| AAQ84783.1  | -TIDKNRRK---SCQ-ACR--LRKCYEV-----GMMKGG----- |
| AAK28730.1  | -TIDKNRRK---SCQ-DCR--LRECYEV-----GMVIGG----- |
| AAC69548.1  | -TIDRNRK---SCQ-ACR--LRKCYEV-----GMMKGG-----  |
| ESR1 ICTPU  | -TIDRNRK---SCQ-ACR--LRKCYEV-----GMMKGG-----  |
| CAC37560.1  | -TIDRNRK---SCQ-ACR--LRKCYEV-----GMMKGG-----  |
| BAB16893.1  | -TIDRNRK---SCQ-ACR--LRKCYEV-----GMMKGG-----  |
| NP_694491.1 | -TIDRNRK---SCQ-ACR--LRKCYEV-----GMMKGG-----  |
| AAL12298.1  | -TIDRNRK---SCQ-ACR--LRKCYEV-----GMMKGG-----  |
| CAB45140.1  | -TMDRNRK---SCQ-ACR--LRKCYEV-----GMVKGG-----  |
| ESR1_ONCMY  | -TMDRNRK---SCQ-ACR--LRKCYEV-----GMVKGG-----  |
| ESR1_SALSA  | -TMDRNRK---SCQ-ACR--LRKCYEV-----GMVKGG-----  |
| A37197      | -TMDRNRK---SCQ-ACR--LRKCYEV-----GMVKGG-----  |
| AAK20929.1  | -TIDRNRK---SCQ-ACR--LRKCYEV-----GMVKG-----   |
| AAB97424.1  | -TIDKNRRK---SCQ-ACR--LRKCYEV-----GMVKCG----- |
| JW0046      | -TIDKNRRK---SCQ-ACR--LRKCYEV-----GMVKCG----- |
| CAA05631.1  | -TIDKNRRK---SCQ-ACR--LRKCYEV-----GMVKCG----- |
| ESR2_RAT    | -TIDKNRRK---SCQ-ACR--LRKCYEV-----GMVKCG----- |
| NP_036886.1 | -TIDKNRRK---SCQ-ACR--LRKCYEV-----GMVKCG----- |
| BAA25431.1  | -TIDKNRRK---SCQ-ACR--LRKCYEV-----GMVKCG----- |
| ESR2_MOUSE  | -TIDKNRRK---SCQ-ACR--LRKCYEV-----GMVKCG----- |
| NP_034287.2 | -TIDKNRRK---SCQ-ACR--LRKCYEV-----GMVKCG----- |
| BAC35719.1  | -TIDKNRRK---SCQ-ACR--LRKCYEV-----GMVKCG----- |
| AAL15175.1  | -TIDKNRRK---SCQ-ACR--LRKCYEV-----GMVKCG----- |
| CAA03949.1  | -TIDKNRRK---NCQ-ACR--LRKCYEV-----GMVKCG----- |
| ESR2_BOVIN  | -TIDKNRRK---SCQ-ACR--LRKCYEV-----GMVKCG----- |
| NP_776476.1 | -TIDKNRRK---SCQ-ACR--LRKCYEV-----GMVKCG----- |
| ESR2_SHEEP  | -TIDKNRRK---SCQ-ACR--LRKCYEV-----GMVKCG----- |
| CAC42097.1  | -TIDKNRRK---SCQ-ACR--LRKCYEV-----GMVKCG----- |
| AAC05751.1  | -TIDKNRRK---SCQ-ACR--LRKCYEV-----GMVKCG----- |
| S71400      | -TIDKNRRK---SCQ-ACR--LRKCYEV-----GMVKCG----- |
| AAC25603.1  | -TIDKNRRK---SCQ-ACR--LRKCYEV-----GMVKCG----- |
| AAC15234.1  | -TIDKNRRK---SCQ-ACR--LRKCYEV-----GMVKCG----- |
| AAD32580.1  | -TIDKNRRK---SCQ-ACR--LRKCYEV-----GMVKCG----- |
| NP_001428.1 | -TIDKNRRK---SCQ-ACR--LRKCYEV-----GMVKCG----- |
| AAK71318.1  | -TIDKNRRK---SCQ-ACR--LRKCYEV-----GMVKCG----- |
| ESR2_CALJA  | -TIDKNRRK---SCQ-ACR--LRKCYEV-----GMVKCG----- |
| AAK71317.1  | -TIDKNRRK---SCQ-ACR--LRKCYEV-----GMVKCG----- |

|             |                                              |
|-------------|----------------------------------------------|
| AAK15151.1  | -TIDKNRRK---SCQ-ACR--LRKCYEV-----GMVKCG----- |
| ESR2_PIG    | -TIDKNRRK---SCQ-ACR--LRKCYEV-----GMVKCG----- |
| ESR2_COTJA  | -TIDKNRRK---SCQ-ACR--LRKCYEV-----GMMKCG----- |
| NP_990125.1 | -TIDKNRRK---SCQ-ACR--LRKCYEV-----GMMKCG----- |
| ESR2_STUVU  | -TIDKNRRK---SCQ-ACR--LRKCYEV-----GMMKCG----- |
| AAD47637.1  | -TIDKNRRK---SCQ-ACR--LRKCYEV-----GMVKCG----- |
| AAK77002.1  | -TIDKNRRK---SCQ-ACR--LR-----                 |
| AAO39210.1  | -TIDKNRRK---SCQ-ACR--LRKCYEV-----GMMKCG----- |
| ESR2_MICUN  | -TIDKNRRK---SCQ-ACR--LRKCYEV-----GMMKCG----- |
| AAP72179.1  | -TIDKNRRK---SCQ-ACR--LRKCYEV-----GMMKCG----- |
| BAD02929.1  | -TIDKNRRK---SCQ-ACR--LRKCYEV-----GMMKCG----- |
| ESR2_ANGJA  | -TIDKNRRK---SCQ-ACR--LRKCYEV-----GMMKCG----- |
| CAC85356.1  | -TIDKSRRK---SCQ-ACR--LRKCYEM-----GMMKCG----- |
| CAC85366.1  | -TIDKSRRK---SCQ-ACR--LRKCYEV-----GMMKCG----- |
| ERB2_CARAU  | -TIDKSRRK---SCQ-ACR--LRKCYEV-----GMMKCG----- |
| CAC93848.1  | -TIDKSRRK---SCQ-ACR--LRKCYEV-----GMMKCG----- |
| NP_777287.1 | -TIDKSRRK---SCQ-ACR--LRKCYEV-----DMMKCG----- |
| ESR2_ICTPU  | -TIDKNRRK---SCQ-ACR--LRKCYEM-----GMMKCG----- |
| AAK16742.1  | -TIDKNRRK---SCQ-ACR--LRKCYEV-----GMMKCG----- |
| NP_851297.1 | -TIDKNRRK---SCQ-ACR--LRKCYEV-----GMMKCG----- |
| AAN60793.1  | -TIDKNRRK---SCQ-ACR--LRKCYEV-----GMMKCG----- |
| CAC93849.1  | -TIDKNRRK---SCQ-ACR--LRKCYEV-----GMMKCG----- |
| ERB1_CARAU  | -TIDKNRRK---SCQ-ACR--LRKCYEV-----GMMKCG----- |
| BAB91218.1  | -TIDKNRRK---SCQ-ACR--LRKCYEV-----GMMKCG----- |
| ESR2_ONCMY  | -TIDKNRRK---SCQ-ACR--LRKCYEV-----GMMKCG----- |
| AAR92486.1  | -TIDKNRRK---SCQ-ACR--LRKCYEV-----GMTKCG----- |
| AAL82742.1  | -TIDKNRRK---SCQ-ACR--LHKCYNV-----GMTKCG----- |
| ESR2_SPAAU  | -TIDKNRRK---SCQ-ACR--LHKCYNV-----GMTKCG----- |
| AAO39211.1  | -TIDKNRRK---SCQ-ACR--LRKCNEV-----GMTKFG----- |
| ESR3_MICUN  | -TIDKNRRK---SCQ-ACR--LRKCYEV-----GMTKCG----- |
| BAB85623.1  | -TIDKNRRK---SCQ-ACR--LRKCYEV-----GMTKCG----- |
| ESR2_ORENI  | -TIDKNRRK---SCQ-ACR--LRKCYEV-----GMTKCG----- |
| BAB79705.1  | -TIDKNRRK---SCQ-ACR--LRKCYEV-----GMTKCG----- |
| AAK57823.1  | -TIDKNRRK---SCQ-ACR--LRKCYEV-----GMMKSE----- |
| AAB97426.1  | -IVRRQRSS---SEQ-VHC--LSKAKRN-----GGHAPR----- |
| AAB97427.1  | -IVRRQRSS---SEQ-VHC--LSKAKRN-----GGHAPR----- |
| AAO89568.1  | -----                                        |
| AAA58462.1  | -----                                        |
| AAQ95045.1  | -TIDKHRRK---SCQ-ACR--LRRCYEV-----GMNKGS----- |
| AAC05114.1  | -----                                        |
| XP_234426.2 | -DTGRPPLVVHPLGL-AAG--GFLAYPA-----HRLELA----- |
| CAE68258.1  | -ETLTQQLA---LGL-ECG--QFSPEKF-----EKFREQ----- |
| NP_500074.1 | -DNLTNQMA---MGM-ECG--QYSAEFK-----EKISEQ----- |
| AAL68274.1  | -EMDMYMRR---KCQ-ECR--LKKCLAV-----GMRPEC----- |
| NP_724456.1 | -EMDMYMRR---KCQ-ECR--LKKCLAV-----GMRPEC----- |
| NP_724459.1 | -EMDMYMRR---KCQ-ECR--LKKCLAV-----GMRPEC----- |
| NP_724460.1 | -EMDMYMRR---KCQ-ECR--LKKCLAV-----GMRPEC----- |
| 1R0NB       | -EMDMYMRR---KCQ-ECR--LKKCLAV-----GMRPEC----- |
| AAG02187.2  | -EMDMYMRR---KCQ-ECR--LKKCLAV-----GMRPEC----- |
| AAG46050.1  | -EMDMYMRR---KCQ-ECR--LRKCLAV-----GMRPEC----- |
| ECR_LUCCU   | -EMDMYMRR---KCQ-ECR--LKKCLAV-----GMRPEC----- |
| CAA11907.1  | -EMDMYMRR---KCQ-ECR--MKKCLAV-----GMRPEC----- |
| AAQ23183.1  | -EMDMYMRR---KCQ-ECR--LKKCLAV-----GMRPEC----- |
| ECR_AEDAE   | -EMDMYMRR---KCQ-ECR--LKKCLAV-----GMRPEC----- |
| AAF19032.1  | -EMDMYMRR---KCQ-ECR--LKKCLAV-----GMRPEC----- |
| ECR_CHITE   | -EMDMYMRR---KCQ-ECR--LKKCLAV-----GMRPEC----- |
| BAA07890.1  | -EMDMYMRR---KCQ-ECR--LKKCLAV-----GMRPEC----- |

|             |                                              |
|-------------|----------------------------------------------|
| ECR_BOMMO   | -EMDMYMRR---KCQ-ECR--LKKCLAV-----GMRPEC----- |
| AAA87340.1  | -EMDMYMRR---KCQ-ECR--LKKCLAV-----GMRPEC----- |
| BAC44997.1  | -EMDMYM-----                                 |
| AAC36491.2  | -EMDMYMRR---KCQ-ECR--LKKCLAV-----GMRPEC----- |
| AAC61596.2  | -EMDMYMRR---KCQ-ECR--LKKCLAV-----GMRPEC----- |
| BAC11713.1  | -EMDMYMRR---KCQ-ECR--LKKCLAV-----GMRPEC----- |
| BAC11714.1  | -EMDMYMRR---KCQ-ECR--LKKCLAV-----GMRPEC----- |
| AAR84611.1  | -EMDMYMRR---KCQ-ECR--LKKCLAV-----GMRPEC----- |
| AAM54494.1  | -EMDMYMRR---KCQ-ECR--LKKCLAV-----GMRPEC----- |
| AAM54496.1  | -EMDMYMRR---KCQ-ECR--LKKCLAV-----GMRPEC----- |
| ECR_HELVI   | -EMDIYMRR---KCQ-ECR--LKKCLAV-----GMRPEC----- |
| ECR_MANSE   | -EMDMYMRR---KCQ-ECR--LKKCLAV-----GMRPEC----- |
| AAB27699.1  | -EMDMY-----                                  |
| XP_320323.1 | -EMDMYMRR---KCQ-ECR--LKKCLAV-----GMRPEC----- |
| AAB94565.1  | -DIDMYMRR---KCQ-ECR--LKKCLSV-----GMRPEC----- |
| AAB94566.1  | -DIDMYMRR---KCQ-ECR--LKKCLSV-----GMRPEC----- |
| AAB94567.1  | -DIDMYMRR---KCQ-ECR--LKKCLSV-----GMRPEC----- |
| AAD19828.1  | -EIDMYMRR---KCQ-ECR--LKKCLTV-----GMRPEC----- |
| CAA72296.1  | -EIDMYMRR---KCQ-ECR--LKKCLSV-----GMRPEC----- |
| AAC33432.2  | -EMDMYMRR---KCQ-ECR--LKKCLNV-----GMRPEC----- |
| AAH61668.1  | -EMDMYMRR---KCQ-ECR--LKKCKAV-----GMLAEC----- |
| AAM33366.1  | -EMDMYMRR---KCQ-ECR--LKKCKAV-----GMLAEC----- |
| AAM33367.1  | -EMDMYMRR---KCQ-ECR--LKKCKAV-----GMLAEC----- |
| NP_941060.1 | -EMDMYMRR---KCQ-ECR--LKKCKAV-----GMLAEC----- |
| NP_963913.1 | -EMDMYMRR---KCQ-ECR--LKKCKAV-----GMLAEC----- |
| NP_963914.1 | -EMDMYMRR---KCQ-ECR--LKKCKAV-----GMLAEC----- |
| NP_963915.1 | -EMDMYMRR---KCQ-ECR--LKKCKAV-----GMLAEC----- |
| XP_227528.2 | -EMDMYMRR---KCP-ECR--LKKCKAV-----GMLAEC----- |
| AAL57619.1  | -EMDMYMRR---KCQ-ECR--LRKCKQM-----GMLAEC----- |
| NP_989444.1 | -EMDMYMRR---KCQ-ECR--LRKCKQM-----GMLAEC----- |
| AAM53546.1  | -VMDMYMRR---KCQ-ECR--LRKCKEM-----GMLAEC----- |
| AAM53548.1  | -VMDMYMRR---KCQ-ECR--LRKCKEM-----GMLAEC----- |
| AAM53550.1  | -VMDMYMRR---KCQ-ECR--LRKCKEM-----GMLAEC----- |
| CAE11874.1  | -VMDMYMRR---KCQ-ECR--LRKCKEM-----GMLAEC----- |
| NP_005114.1 | -VMDMYMRR---KCQ-ECR--LRKCKEM-----GMLAEC----- |
| NP_068513.1 | -VMDMYMRR---KCQ-DCR--LRKCREM-----GMLAEC----- |
| AAM53547.1  | -VMDMYMRR---KCQ-ECR--LRKCKEM-----GMLAEC----- |
| AAM53549.1  | -VMDMYMRR---KCQ-ECR--LRKCKEM-----GMLAEC----- |
| AAM53551.1  | -VMDMYMRR---KCQ-ECR--LRKCKEM-----GMLAEC----- |
| NRH4_HUMAN  | -VMDMYMRR---KCQ-ECR--LRKCKEM-----GMLAEC----- |
| I49019      | -VMDMYMRR---KCQ-ECR--LRKCREM-----GMLAEC----- |
| NRH4_MOUSE  | -VMDMYMRR---KCQ-ECR--LRKCREM-----GMLAEC----- |
| I49020      | -VMDMYMRR---KCQ-ECR--LRKCREM-----GMLAEC----- |
| NP_033134.1 | -VMDMYMRR---KCQ-ECR--LRKCREM-----GMLAEC----- |
| AAM18081.2  | -VMDMYMRR---KCQ-ECR--LRKCKEM-----GMLAEC----- |
| AAA58594.1  | -QMDAFMRR---KCQ-QCR--LRKCKEA-----GMREQC----- |
| NP_009052.1 | -QMDAFMRR---KCQ-QCR--LRKCKEA-----GMREQC----- |
| BAC36906.1  | -QMDAFMRR---KCQ-LCR--LRKCKEA-----GMREQC----- |
| NP_033499.1 | -QMDAFMRR---KCQ-LCR--LRKCKEA-----GMREQC----- |
| NP_113814.1 | -QMDAFMRR---KCQ-LCR--LRKCKEA-----GMREQC----- |
| NRH2_RAT    | -QMDAFMRR---KCQ-LCR--LRKCKEA-----GMREQC----- |
| AAD16050.1  | -PMDTYMRR---KCQ-ECR--LRKCRQA-----GMREEC----- |
| NP_038867.1 | -PMDTYMRR---KCQ-ECR--LRKCRQA-----GMREEC----- |
| NP_113815.1 | -PMDTYMRR---KCQ-ECR--LRKCRHA-----GMREEC----- |
| AAO12508.1  | -PMDTYMRR---KCQ-ECR--LRKCRQA-----GMREEC----- |
| AAH08819.1  | -PMDTYMRR---KCQ-ECR--LRKCRQA-----GMREEC----- |
| NRH3_HUMAN  | -PMDTYMRR---KCQ-ECR--LRKCRQA-----GMREEC----- |

|             |                                              |
|-------------|----------------------------------------------|
| AAH41172.1  | -PMDTYMRR---KCQ-ECR--LRKCRQA-----GMREEC----- |
| NP_005684.1 | -PMDTYMRR---KCQ-ECR--LRKCRQA-----GMREEC----- |
| AAO19584.1  | -PMDTYMRR---KCQ-ECR--LRKCRQA-----GMREE-----  |
| AAO19585.1  | -PMDTYMRR---KCQ-ECR--LRKCRQA-----GMREE-----  |
| AAO19595.1  | -PMDTYMRR---KCQ-ECR--LRKCRQA-----GMREE-----  |
| AAO19583.1  | -PMDTYMRR---KCQ-ECR--LRKCRQA-----GMREE-----  |
| AAO19586.1  | -PMDTYMRR---KCQ-ECR--LRKCRQA-----GMREE-----  |
| AAO19587.1  | -PMDTYMRR---KCQ-ECR--LRKCRQA-----GMREE-----  |
| AAO19588.1  | -PMDTYMRR---KCQ-ECR--LRKCRQA-----GMREE-----  |
| AAO19590.1  | -PMDTYMRR---KCQ-ECR--LRKCRQA-----GMREE-----  |
| AAO19591.1  | -PMDTYMRR---KCQ-ECR--LRKCRQA-----GMREE-----  |
| AAO19592.1  | -PMDTYMRR---KCQ-ECR--LRKCRQA-----GMREE-----  |
| AAO19594.1  | -PMDTYMRR---KCQ-ECR--LRKCRQA-----GMREE-----  |
| CAD45182.1  | -EMDMYMRR---KCQ-ECR--LRKCRQA-----GMREE-----  |
| NP_989873.1 | -EMDMYMRR---KCQ-ECR--LRKCRQA-----GMREE-----  |
| AAO19593.1  | -PMDTYMRR---KCQ-ECR--LRKCRQA-----GMREE-----  |
| 1KB2        | ITKD-NRRH---CQ-ACR--LKRCVDI-----GMMKEF-----  |
| AAK48863.1  | ITKD-NRRH---CQ-ACR--LKRCVDI-----GMMKEF-----  |
| VDR_BOVIN   | ITKD-NRRH---CQ-ACR--LKRCVDI-----GMMKEF-----  |
| NP_000367.1 | ITKD-NRRH---CQ-ACR--LKRCVDI-----GMMKEF-----  |
| NP_033530.2 | ITKD-NRRH---CQ-ACR--LKRCVDI-----GMMKEF-----  |
| VDR_MOUSE   | ITKD-NRRH---CQ-ACR--LKRCVDI-----GMMKEF-----  |
| NP_058754.1 | ITKD-NRRH---CQ-ACR--LKRCVDI-----GMMKEF-----  |
| NP_990429.1 | ITKD-NRRH---CQ-ACR--LKRCVDI-----GMMKEF-----  |
| VDR_COTJA   | ITKD-NRRH---CQ-ACR--LKRCVDI-----GMMKEF-----  |
| VDR_XENLA   | ITKD-NRRH---CQ-SCR--LKRCVDI-----GMMKEF-----  |
| A60912      | ITKD-NRRH---CQ-ACR--LKRCVDI-----GMMK-----    |
| JC7229      | ITKD-NRRH---CQ-ACR--LKRCIDI-----GMMKEF-----  |
| NP_570994.1 | ITKD-NRRH---CQ-ACR--LKRCIDI-----GMMKEF-----  |
| JC7230      | ITKD-NRRH---CQ-ACR--LKRCVDI-----GMMREF-----  |
| AAA61274.1  | ITKD-NRRH---CQ-ACR--LKRCVDI-----GMM-----     |
| AAP05810.1  | ITKD-NRRH---CQ-ACR--LKRCRDI-----GMMKEL-----  |
| CAB55489.1  | ITRK-TRRQ---CQ-ACR--LRKCLES-----GMKNEM-----  |
| CAB55490.1  | ITRK-TRRQ---CQ-ACR--LRKCLES-----GMKNEM-----  |
| CAB55492.1  | ITRK-TRRQ---CQ-ACR--LRKCLES-----GMKNEM-----  |
| CAB55493.1  | ITRK-TRRQ---CQ-ACR--LRKCLES-----GMKNEM-----  |
| NP_003880.3 | ITRK-TRRQ---CQ-ACR--LRKCLES-----GMKKEM-----  |
| NP_148934.1 | ITRK-TRRQ---CQ-ACR--LRKCLES-----GMKKEM-----  |
| NP_071285.1 | ITRK-TRRQ---CQ-ACR--LRKCLES-----GMKKEM-----  |
| AAM10633.1  | ITRK-TRRQ---CQ-ACR--LRKCLES-----GMKKEM-----  |
| NP_035066.1 | ITRK-TRRQ---CQ-ACR--LRKCLES-----GMKKEM-----  |
| NP_443212.1 | ITRK-TRRQ---CQ-ACR--LRKCLES-----GMKKEM-----  |
| BAB27404.1  | ITRK-TRRQ---CQ-ACR--LRKCLES-----GMKKEM-----  |
| AAD54426.1  | ITRK-TRRQ---CQ-ACR--LRKCLES-----GMKKEM-----  |
| AAH41187.1  | INKS-NRRH---CQ-ACR--LKKCLDI-----GMRKEL-----  |
| S41497      | INKS-NRRH---CQ-ACR--LKKCLDI-----GMRKEL-----  |
| JC7510      | INKN-NRRH---CQ-ACR--LKKCLDI-----GMRKEL-----  |
| AAC53350.1  | VSKA-QRRH---CP-ACR--LQKCLNV-----GMRKDM-----  |
| NP_033933.1 | VSKA-QRRH---CP-ACR--LQKCLNV-----GMRKDM-----  |
| BAC84956.1  | VSKA-QRRH---CP-ACR--LQKCLNV-----GMRKDM-----  |
| NP_075230.1 | VSKA-QRRH---CP-ACR--LQKCLNV-----GMRKDM-----  |
| AAM76230.1  | VSKI-QRRH---CP-ACR--LQKCLDA-----GMRKDM-----  |
| NP_005113.1 | VSKT-QRRH---CP-ACR--LQKCLDA-----GMRKDM-----  |
| BAD00038.1  | VNKA-QRRH---CP-ACR--LQKCLDA-----GMKKEM-----  |
| BAD00039.1  | VNKA-QRRH---CP-ACR--LQKCLDA-----GMKKEM-----  |
| NP_990033.1 | ITKA-KRRQ---CQ-ACR--LQKCLDV-----GMRKDM-----  |
| AAP31437.1  | ITSA-SRKF---CQ-ACR--LNKCFAV-----GMNSEW-----  |

|             |                                                      |
|-------------|------------------------------------------------------|
| NP_741445.1 | ITSA-SRKF----CQ-ACR--LNKCFAV-----GMNSEW-----         |
| CAE61946.1  | ITSA-SRKF----CQ-ACR--LNKCFAV-----GMSSEW-----         |
| NP_509782.1 | INSV-SRRF----CQ-KCR--LRKCFTV-----GMKKEW-----         |
| NP_509784.1 | INSV-SRRF----CQ-KCR--LRKCFTV-----GMKKEW-----         |
| T20733      | INSV-SRRF----CQ-KCR--LRKCFTV-----GMKKEW-----         |
| CAE60812.1  | INSV-SRRF----CQ-KCR--LRKCFTV-----GMKKEW-----         |
| CAE63355.1  | INMV-SRRF----CQ-RCR--LTKCFVSMFRKQNK-TDFLVGMKKEW----- |
| NH48 CAEEL  | INMV-SRRF----CQ-RCR--LTKCFVSLAEKSHRLEELFVGMKKEW----- |
| NP_741940.1 | INMV-SRRF----CQ-RCR--LTKCFAV-----GMKKEW-----         |
| NP_524493.1 | ITVV-TRRF----CQ-KCR--LRKCLDI-----GMKSEN-----         |
| XP_313130.1 | ITIV-TRRF----CQ-KCR--LEKCFRI-----GMKKEY-----         |
| AAP21572.1  | IDKK-NRTT----CK-ACR--LRKCYNV-----GMSKGG-----         |
| KNIR_DROVI  | IDKK-NRTT----CK-ACR--LRKCYNV-----GMSKGG-----         |
| AAP12718.1  | IDKK-NRTT----CK-ACR--LRKCYNV-----GMSKGG-----         |
| NP_524187.1 | IDKK-NRTT----CK-ACR--LRKCYNV-----GMSKGG-----         |
| S01919      | IDKK-NRTT----CK-ACR--LRKCYNV-----GMSKGG-----         |
| CAF21851.1  | INKK-NRTA----CK-ACR--LRKCLLV-----GMSKSG-----         |
| NP_788552.1 | INKK-NRTA----CK-ACR--LKKCLMV-----GMSKSG-----         |
| EGON_DROME  | INKK-NRTA----CK-ACR--LRKCLLV-----GMSKSG-----         |
| NP_524206.1 | INKK-NRTA----CK-ACR--LRKCLLV-----GMSKSG-----         |
| AAG15123.1  | IQKN-VRCM----CR-ACR--FTKCIAV-----GMRKSA-----         |
| NP_510659.1 | IQKN-VRCM----CR-ACR--FTKCIAV-----GMRKSA-----         |
| T19202      | IQKN-VRCM----CR-ACR--FTKCIAV-----GMRKSA-----         |
| CAE69977.1  | IQKN-VRCM----CR-ACR--FSKCMSV-----GMRKSA-----         |
| AAG15170.1  | ILST-IRCM----CR-ACR--FAKMAV-----GMKREA-----          |
| NP_507636.1 | ILST-IRCM----CR-ACR--FAKMAV-----GMKREA-----          |
| AAG15171.1  | ILST-IRCM----CR-ACR--FAKMAV-----GMKREA-----          |
| AAG15172.1  | ILST-IRCM----CR-ACR--FAKMAV-----GMKREA-----          |
| CAE73281.1  | ILST-IRCM----CR-ACR--YAKCLNV-----GMKKEA-----         |
| AAG15175.1  | ITAN-IRCM----CR-SCR--FAKCLEV-----GMNPAG-----         |
| AAG15176.1  | ITAN-IRCM----CR-SCR--FAKCLEV-----GMNPAG-----         |
| AAG15177.1  | ITAN-IRCM----CR-SCR--FAKCLEV-----GMNPAG-----         |
| NP_503561.2 | ITAN-IRCM----CR-SCR--FAKCLEV-----GMNPAG-----         |
| CAE66792.1  | IAAN-VRCM----CR-ACR--FTKCLEV-----GMNPAG-----         |
| G88124      | VTIN-IRCM----CR-ACR--YIKCIEV-----GMNPAG-----         |
| NP_494785.1 | VTIN-IRCM----CR-ACR--YIKCIEV-----GMNPAG-----         |
| NP_494784.1 | VTVN-IRCM----CR-ACR--YVKCIEV-----GMNPVG-----         |
| F88124      | VTVN-IRCM----CR-ACR--LTKCIEV-----GMNPVG-----         |
| CAE60139.1  | VTIN-IRCM----CR-SCR--FSKCLQV-----GMNPMG-----         |
| NP_505589.1 | VSSN-IRCM----CR-SCR--YDKCIEV-----GMNPEC-----         |
| AAG15147.1  | ILSN-VRNM----CR-ACR--YEKCLEV-----GMQRSS-----         |
| AAG15148.1  | ILSN-VRNM----CR-ACR--YEKCLEV-----GMQRSS-----         |
| NP_741644.1 | ILSN-VRNM----CR-ACR--YEKCLEV-----GMQRSS-----         |
| CAE61044.1  | ILSN-VRNM----CR-SCR--YEKCIDV-----GMKRSG-----         |
| CAE64011.1  | VNTI-VRSI----CK-FCR--LKKCFEV-----GMKSTS-----         |
| NP_505588.1 | INTI-IRSI----CK-SCR--LNKCLNL-----GMKRSC-----         |
| AAG15132.1  | VDTG-MRKL----CA-SCR--YDKCLKV-----GMRESA-----         |
| NP_504771.1 | VDTG-MRKL----CA-SCR--YDKCLKV-----GMRESA-----         |
| CAE71986.1  | VDTG-MRKL----CA-SCR--YDKCLKM-----GMRESA-----         |
| CAE58238.1  | THNQLLRRL----CP-SCR--YEKCVQI-----GMRTCA-----         |
| NP_503460.1 | LENQVLRRL----CA-KCR--YEKCVQV-----GMRTSA-----         |
| CAE65524.1  | LDTVVSRRRL----CP-FCR--YDKCLRI-----GMKTTA-----        |
| CAE64776.1  | TNNE-DRFN----CR-YCR--YQKCLSC-----GMTPEN-----         |
| NP_505639.1 | TNNE-DRFN----CR-YCR--YQKCLSN-----GMTPEST-----D-----  |
| AAO39179.1  | NHLI-FALK----CK-NCR--LQRCYEA-----GMSSEN-----FQFCRD   |
| NP_507680.1 | NHLI-FALK----CK-NCR--LQRCYEA-----GMSSEN-----FQFCRD   |
| CAE17952.1  | NHLI-FALK----CK-NCR--LQRCYEA-----GMSSEN-----FQFCRD   |

|             |               |                      |              |        |
|-------------|---------------|----------------------|--------------|--------|
| CAE56100.1  | NHLK-FARK---- | CR-FCR--LQKCYEA----- | GMNSESK----- | FPILSG |
| NP_503608.2 | TSVN-GKFN---- | CK-QCR--LKKCLDV----- | GMDTRR-----  |        |
| T43356      | TSVN-GKFN---- | CK-QCR--LKKCLDV----- | GMDTRR-----  |        |
| T31792      | TSVN-GKFN---- | CK-QCR--LKKCLDV----- | GMDTR-----   |        |
| CAE74995.1  | LFKK-GCFT---- | CK-FCR--LQKCFKV----- | GMSMET-----  |        |
| NP_503455.1 | PNKN-GKWF---- | CK-TCR--LERCFLR----- | GMTPSN-----  |        |
| CAE74767.1  | DPTK-RGGS---- | CR-FCR--FLKCVTS----- | GMMPQD-----  |        |
| NP_501728.1 | DPTK-RGGS---- | CR-FCR--FLKCVSS----- | GMMPQD-----  |        |
| NP_510119.1 | IVLDSGESQ---- | CR-FCR--FHKCIIV----- | GMIFLD-----  |        |
| CAE67969.1  | VLST-VRKM---- | CK-CCR--YAKCLAV----- | GMRKEG-----  |        |
| A42128      | --IDKTQRKR--- | CP-FCR--FQKCLTV----- | GMRLE-----   | A      |
| AAB28339.1  | --IDKTQRKR--- | CP-FCR--FQKCLTV----- | GMRLE-----   | A      |
| NP_620639.1 | --IDKTQRKR--- | CP-FCR--FQKCLTV----- | GMRLE-----   | A      |
| NP_776828.1 | --IDKTQRKR--- | CP-FCR--FQKCLTV----- | GMRLE-----   | A      |
| AAG24622.1  | --IDKTQRKR--- | CP-FCR--FQKCLTV----- | GMRLE-----   | A      |
| STF1_MOUSE  | --IDKTQRKR--- | CP-FCR--FQKCLTV----- | GMRLE-----   | A      |
| NP_004950.2 | --IDKTQRKR--- | CP-FCR--FQKCLTV----- | GMRLE-----   | A      |
| NP_445796.1 | --IDKTQRKR--- | CP-FCR--FQKCLTV----- | GMRLE-----   | A      |
| BAA19127.1  | --IDKTQRKR--- | CP-FCR--FQKCLTV----- | GMRLE-----   | A      |
| AAG35648.1  | --IDKTLRKR--- | CP-FCR--FQKCLTV----- | GMRLE-----   | A      |
| STF1_PIG    | --IDKTQRKR--- | CP-FCR--FQKCLTV----- | GMRLE-----   | A      |
| JC4972      | --IDKTQRNR--- | CP-FCR--FQKCLTV----- | GMRLE-----   | A      |
| AAD01975.1  | --IDKTQRKR--- | CP-YCR--FQKCLTV----- | GMRLE-----   | A      |
| AAK94918.1  | --IDKTQRKR--- | CP-YCR--FQKCLTV----- | GMRLE-----   | A      |
| BAA76713.1  | --IDKTQRKR--- | CP-YCR--FQKCLTV----- | GMRLE-----   | A      |
| NP_990408.1 | --IDKTQRKC--- | CP-YCR--FQKCLTV----- | GMRLE-----   | A      |
| AAK97659.1  | --IDKTQRKR--- | CP-YCR--FQKCLTV----- | GMRLE-----   | A      |
| AAM89250.1  | --IDKTQRKR--- | CP-FCR--FQKCLNV----- | GMRLE-----   | A      |
| AAO59489.1  | --IDKTQRKR--- | CP-FCR--FQKCLNV----- | GMRLE-----   | A      |
| BAA25269.1  | --IDKTQRKR--- | CP-FCR--FQKCLNV----- | GMRLE-----   | A      |
| BAA32394.1  | --IDKTQRKR--- | CP-FCR--FQKCLNV----- | GMRLE-----   | A      |
| BAC75890.1  | --IDKTQRKR--- | CP-FCR--FQKCLNV----- | GMRLE-----   | A      |
| AAS47030.1  | --IDKTQRKR--- | CP-YCR--FQKCLTV----- | GMRLE-----   | A      |
| BAA36789.1  | --IDKTQRKR--- | CP-YCR--FQKCLNV----- | GMRLE-----   | A      |
| AAG49004.1  | --IDKTQRKR--- | CP-FCR--FQKCLSV----- | GMRLE-----   | A      |
| AAG49005.1  | --IDKTQRKR--- | CP-FCR--FQKCLSV----- | GMRLE-----   | A      |
| NP_571869.1 | --IDKTQRKR--- | CP-FCR--FQKCLSV----- | GMRLE-----   | A      |
| A56543      | --IDKTQRKR--- | CP-YCR--FQKCLSV----- | GMRLE-----   | A      |
| AAA64285.1  | --IDKTQRKR--- | CP-YCR--FQKCLSV----- | GMRLE-----   | A      |
| AAA18357.1  | --IDKTQRKR--- | CP-YCR--FQKCLSV----- | GMRLE-----   | A      |
| AAO21918.1  | --IDKTQRKR--- | CP-YCR--FQKCLSL----- | GMRLE-----   | A      |
| AAK54449.1  | --IDKTQRKR--- | CP-YCR--FQKCLTV----- | GMRLE-----   | A      |
| NP_571538.1 | --IDKTQRKR--- | CP-YCR--FQKCLTV----- | GMRLE-----   | A      |
| AAD03155.1  | --IDKTQRKR--- | CP-YCR--FQKCLSV----- | GMRLE-----   | A      |
| AAD03248.1  | --IDKTQRKR--- | CP-YCR--FQKCLSV----- | GMRLE-----   | A      |
| AAG35649.1  | --IDKTQRKR--- | CP-YCR--FQKCLSV----- | GMRLE-----   | A      |
| BAA34092.1  | --IDKTQRKR--- | CP-YCR--FQKCLSV----- | GMRLE-----   | A      |
| NP_990409.1 | --IDKTQRKR--- | CP-YCR--FQKCLSV----- | GMRLE-----   | A      |
| NP_995582.1 | --IDKTQRKR--- | CP-YCR--FQKCLSV----- | GMRLE-----   | A      |
| NP_003813.1 | --IDKTQRKR--- | CP-YCR--FQKCLSV----- | GMRLE-----   | A      |
| BAA94077.1  | --IDKTQRKR--- | CP-YCR--FQKCLSV----- | GMRLE-----   | A      |
| BAA94078.1  | --IDKTQRKR--- | CP-YCR--FQKCLSV----- | GMRLE-----   | A      |
| AAC52645.1  | --IDKTQRKR--- | CP-YCR--FKKCIDV----- | GMRLE-----   | A      |
| BAA36340.1  | --IDKTQRKR--- | CP-YCR--FKKCIDV----- | GMRLE-----   | A      |
| NP_109601.1 | --IDKTQRKR--- | CP-YCR--FKKCIDV----- | GMRLE-----   | A      |
| NP_068510.1 | --IDKTQRKR--- | CP-YCR--FKKCIDV----- | GMRLE-----   | A      |
| AAQ72771.1  | --IDITQRKR--- | CP-FCR--FQKCLHV----- | GMRLE-----   | A      |

|             |                                              |
|-------------|----------------------------------------------|
| T01791      | --IDKTQRK-----P-FCR--FQKCLTV-----GMRLE-----  |
| BAB18653.1  | --IDKTQRKR---CP-FCR--FQKCLTV-----GMRLE-----  |
| NP_524143.2 | --IDKTQRKR---CP-YCR--FQKCLEV-----GMKLE-----A |
| NP_730359.1 | --IDKTQRKR---CP-YCR--FQKCLEV-----GMKLE-----A |
| T13733      | --IDKTQRKR---CP-YCR--FQKCLEV-----GMKLE-----A |
| AAA28915.1  | --IDKTQRKR---CP-YCR--FQKCLEV-----GMKLE-----A |
| AAF82307.1  | --IDKTQRKR---CP-YCR--FQKCLEV-----GMKLE-----A |
| XP_315680.1 | --IDKTQRKR---CP-YCR--FQKCLEV-----GMKLE-----A |
| AA150351.1  | --IDKTQRKR---CP-FCR--FQKCLDV-----GMKLE-----A |
| FTF1_BOMMO  | --IDKTQRKR---CP-FCR--FQKCLDV-----GMKLE-----A |
| BAA01745.1  | --IDKTQRKR---CP-FCR--FQKCLDV-----GMKLE-----A |
| AAD41899.1  | --IDKTQRKR---CP-YCR--FQKCLEV-----GMKLE-----A |
| XP_315681.1 | --IDKTQRKR---CP-YCR--FQKCLEV-----GMKLE-----G |
| AAF67038.1  | --VDRTCRKR---CP-SCR--FQKCLTM-----GMKME-----A |
| AAF67040.1  | --VDRTCRKR---CP-SCR--FQKCLTM-----GMKME-----A |
| NH25_CAEEEL | --VDRTCRKR---CP-SCR--FQKCLTM-----GMKME-----A |
| CAE70358.1  | --VDRTCRKR---CP-SCR--FQKCLTM-----GMKME-----A |
| AAK19303.1  | --MDLAQRKR---CP-YCR--FQKCVAV-----GMKKE-----A |
| FTFB_DROME  | --VSISTRKK---CP-ACR--FEKCLQK-----GMKLE-----A |
| NP_476932.1 | --VSISTRKK---CP-ACR--FEKCLQK-----GMKLE-----A |
| NP_476933.1 | --VSISTRKK---CP-ACR--FEKCLQK-----GMKLE-----A |
| AAA28543.1  | --VSISTRKK---CP-ACR--FEKCLQK-----GMKLE-----A |
| S33708      | --VSISTRKK---CP-ACR--FEKCLQK-----GMKLE-----A |
| S33709      | --VSISTRKK---CP-ACR--FEKCLQK-----GMKLE-----A |
| XP_310077.1 | --VTIATRKK---CP-ACR--FEKCLQK-----GMKLE-----A |
| BAA34123.1  | --VTVATRKK---CP-ACR--FDKCLGC-----GMKLE-----A |
| AAG49449.1  | --INVASRKK---CP-ACR--FLKCVDK-----GMRIE-----A |
| AAG29619.1  | -EITKRRRK---SCQ-ACR--FMKCLKV-----GMLKEG----- |
| NP_004443.2 | -EITKRRRK---SCQ-ACR--FMKCLKV-----GMLKEG----- |
| ERR2_RAT    | -EITKRRRK---SCQ-ACR--FMKCLKV-----GMLKEG----- |
| AAH44858.1  | -EITKRRRK---SCQ-ACR--FMKCLKV-----GMLKEG----- |
| NP_036064.2 | -EITKRRRK---SCQ-ACR--FMKCLKV-----GMLKEG----- |
| BAC27656.1  | -EITKRRRK---SCQ-ACR--FMKCLKV-----GMLKEG----- |
| ERR2_MOUSE  | -EITKRRRK---SCQ-ACR--FMKCLKV-----GMLKEG----- |
| 1L01        | -EITKRRRK---SCQ-ACR--FMKCLKV-----GMLKEG----- |
| AAS66635.1  | -EITKRRRK---SCQ-ACR--FMKCLKV-----GMLKEG----- |
| AAH08218.1  | -EITKRRRK---SCQ-ACR--FMKCLKV-----GMLKEG----- |
| NP_976081.1 | -EITKRRRK---SCQ-ACR--FMKCLKV-----GMLKEG----- |
| AAH64700.1  | -EITKRRRK---SCQ-ACR--FMKCLKV-----GMLKEG----- |
| NP_036065.1 | -EITKRRRK---SCQ-ACR--FMKCLKV-----GMLKEG----- |
| BAA74855.2  | -EITKRRRK---SCQ-ACR--FMKCLKV-----GMLKEG----- |
| AAQ93376.1  | -EITKRRRK---SCQ-ACR--FMKCLKV-----GMLKEG----- |
| BAC41450.1  | -EITKRRRK---SCQ-ACR--FMKCLKV-----GMLKEG----- |
| AAS66636.1  | -EITKRRRK---SCQ-ACR--FMKCLTV-----GMMREG----- |
| AAB17015.1  | -EITKRRRK---ACQ-ACR--FTKCLRV-----GMLKEG----- |
| AAH63795.1  | -EITKRRRK---ACQ-ACR--FTKCLRV-----GMLKEG----- |
| ERR1_HUMAN  | -EITKRRRK---ACQ-ACR--FTKCLRV-----GMLKEG----- |
| ERR1_MOUSE  | -EITKRRRK---ACQ-ACR--FTKCLRV-----GMLKEG----- |
| A29345      | -EITKRRRK---ACQ-ACR--FTKCLRV-----GMLKEG----- |
| XP_215174.2 | -EITKRRRK---ACQ-ACR--FTKCLRV-----GMLKEG----- |
| NP_004442.3 | -EITKRRRK---ACQ-ACR--FTKCLRV-----GMLKEG----- |
| NP_031979.1 | -EITKRRRK---ACQ-ACR--FTKCLRV-----GMLKEG----- |
| AAS20260.1  | -EITKRRRK---ACQ-ACR--FTKCLRV-----GMLKEG----- |
| AAS66634.1  | -EITKRRRK---ACQ-ACR--FTKCLRV-----GMLKEG----- |
| AAS66637.1  | -EITKRRRK---SCQ-ACR--FQKCLRA-----GMMREG----- |
| NP_648183.3 | -EINKRRRK---ACQ-ACR--FQKCLLM-----GMLKEG----- |
| NP_729340.1 | -EINKRRRK---ACQ-ACR--FQKCLLM-----GMLKEG----- |

|             |                                              |
|-------------|----------------------------------------------|
| XP_321343.1 | -EINKRRRK---ACQ-ACR--FRKCLLM-----GMLKEG----- |
| AAK01303.1  | -IIDKIRRK---NCP-ACR--YRKCLQAG-----MNLEA----- |
| AAP48589.1  | -IIDKIRRK---NCP-ACR--YRKCLQAG-----MNLEA----- |
| GCR_SAGOE   | -IIDKIRRK---NCP-ACR--YRKCLQAG-----MNLEA----- |
| GCR_SAIBB   | -IIDKIRRK---NCP-ACR--YRKCLQAG-----MNLEA----- |
| GCR_AOTNA   | -IIDKIRRK---NCP-ACR--YRKCLQAG-----MNLEA----- |
| GCR_SAISC   | -IIDKIRRK---NCP-ACR--YRKCLQAG-----MNLEA----- |
| 1802363A    | -IIDKIRRK---NCP-ACR--YRKCLQAG-----MNLEA----- |
| AAC34207.1  | -IIDKIRRK---NCP-ACR--YRKCLQAG-----MNLEA----- |
| QRHUGB      | -IIDKIRRK---NCP-ACR--YRKCLQAG-----MNLEA----- |
| NP_000167.1 | -IIDKIRRK---NCP-ACR--YRKCLQAG-----MNLEA----- |
| CAE45716.1  | -IIDKIRRK---NCP-ACR--YRKCLQAG-----MNLEA----- |
| AAA16603.1  | -IIDKIRRK---NCP-ACR--YRKCLQAG-----MNLEA----- |
| AAF66595.1  | -IIDKIRRK---NCP-ACR--YRKCLQAG-----MNLEA----- |
| GCR_PIG     | -IIDKIRRK---NCP-ACR--YRKCLQAG-----MNLEA----- |
| CAC10271.1  | -IIDKIRRK---NCP-ACR--YRKCLQAG-----MNLEA----- |
| GCR_TUPGB   | -IIDKIRRK---NCP-ACR--YRKCLQAG-----MNLEA----- |
| AAO85271.2  | -IIDKIRRK---NCP-ACR--YRKCLQAG-----MNLEA----- |
| GCR_RABIT   | -IIDKIRRK---NCP-ACR--YRKCLQAG-----MNLEA----- |
| 1R4R        | -IIDKIRRK---NCP-ACR--YRKCLQAG-----MNLEA----- |
| A54273      | -IIDKIRRK---NCP-ACR--YRKCLQAG-----MNLEA----- |
| GCR_CAVPO   | -IIDKIRRE---NCP-ACR--YRKCLQAG-----MNLQA----- |
| AAB07866.1  | -IIDKIRRK---NCP-ACR--YRKCLQAG-----MNLEA----- |
| NP_036708.1 | -IIDKIRRK---NCP-ACR--YRKCLQAG-----MNLEA----- |
| AAL66772.2  | -IIDKIRRK---NCP-ACR--YRKCLQAG-----MNLEA----- |
| AAL78956.1  | -IIDKIRRK---NCP-ACR--YRKCLQAG-----MNLEA----- |
| GCR_RAT     | -IIDKIRRK---NCP-ACR--YRKCLQAG-----MNLEA----- |
| CAA72938.1  | -IIDKIRRK---NCP-ACR--YRKCLQAG-----MNLEA----- |
| CAA31738.1  | -IIDKIRRK---NCP-ACR--YRKCLQAG-----MNLEA----- |
| NP_032199.1 | -IIDKIRRK---NCP-ACR--YRKCLQAG-----MNLEA----- |
| CAA31739.1  | -IIDKIRRK---NCP-ACR--YRKCLQAG-----MNLEA----- |
| 1R4O        | -IIDKIRRK---NCP-ACR--YRKCLQAG-----MNLEA----- |
| GCR_XENLA   | -IIDKIRRK---NCP-ACR--YRKCLQAG-----MNLEA----- |
| S44047      | -IIDKIRRK---NCP-ACR--YRKCLQAG-----MNLEA----- |
| CAA68545.1  | -IIDKIRRK---NCP-ACR--YRKCLQAG-----MNLEA----- |
| 1GLU        | -IIDKIRRK---NCP-ACR--YRKCLQAG-----MNLEA----- |
| GCR_ONCMY   | -IIDKIRRK---NCP-ACR--FRKCLQAG-----MNLEA----- |
| AAS48459.1  | -IIDKIRRK---NCP-ACR--FRKCLQAG-----MNLEA----- |
| GCR_PAROL   | -IIDKIRRK---NCP-ACR--FRKCLQAG-----MNLEA----- |
| AAM27889.1  | -IIDKIRRK---NCP-ACR--FRKCLQAG-----MNLEA----- |
| AAM27888.1  | -IIDKIRRK---NCP-ACR--FRKCLQAG-----MNLEA----- |
| 1RGD        | -IIDKIRRK---NCP-ACR--YRKCLQAG-----MNLEA----- |
| 1GDC        | -IIDKIRRK---NCP-ACR--YRKCLQAG-----MNLEA----- |
| AAR87479.1  | -IIDKIRRK---NCP-ACR--FRKCLLAG-----MNLEA----- |
| AAM27887.1  | -IIDKIRRK---NCP-ACR--FRKCLMAG-----MNLEA----- |
| AAK20930.1  | -IIDKIRRK---NCP-ACR--LRKCIQAG-----MTLGA----- |
| AAA75575.1  | -IIDKIRRK---NCP-ACR--LQKCLQAG-----MNLGA----- |
| MCR_XENLA   | -IIDKIRRK---NCP-ACR--LQKCLQAG-----MNLGA----- |
| AAB35738.1  | -IIDKIRRK---NCP-ACR--LQKCLQAG-----MNLGA----- |
| AAC63513.1  | -IIDKIRRK---NCP-ACR--LQKCLQAG-----MNLGA----- |
| NP_000892.1 | -IIDKIRRK---NCP-ACR--LQKCLQAG-----MNLGA----- |
| AAP48590.1  | -IIDKIRRK---NCP-ACR--LQKCLQAG-----MNLGA----- |
| AAP48591.1  | -IIDKIRRK---NCP-ACR--LQKCLQAG-----MNLGA----- |
| MCR_SAISC   | -IIDKIRRK---NCP-ACR--LQKCLQAG-----MNLGA----- |
| NP_037263.1 | -IIDKIRRK---NCP-ACR--LQKCLQAG-----MNLGA----- |
| XP_356093.1 | -IIDKIRRK---NCP-ACR--LQKCLQAG-----MNLGA----- |
| MCR_MOUSE   | -IIDKIRRK---NCP-ACR--LQKCLQAG-----MNLGA----- |

|             |                                               |
|-------------|-----------------------------------------------|
| MCR_TUPGB   | -IIDKIRRK---NCP-ACR--LQKCLQAG-----MNLGA-----  |
| AAM27890.1  | -IIDKIRRK---NCP-ACR--VRKCLQAG-----MNLGA-----  |
| 1LAT        | -IIDKIRRK---NCP-ACR--YRKCLQAG-----MNLEA-----  |
| CAC67405.1  | -IIDKIRRK---NCP-ACR--LQKCLQAG-----MNLGE-----  |
| AAK20931.1  | -IIDKIRRK---NCP-ACR--LRKCCQAG-----MVLGA-----  |
| AAA49009.1  | -----                                         |
| AAA49010.1  | -----                                         |
| AAA49012.1  | -IVDKIRRK---NCP-ACR--LRKCCQAG-----MVLGG-----  |
| NP_990593.1 | -IVDKIRRK---NCP-ACR--LRKCCQAG-----MVLGG-----  |
| AAA49013.1  | -IVDKIRRK---NCP-ACR--LRNCCQAG-----MVLGG-----  |
| AAA49014.1  | -IVDKIRRK---NCP-ACR--LRNCCQAG-----MVLGG-----  |
| AAA60081.1  | -IVDKIRRK---NCP-ACR--LRKCCQAG-----MVLGG-----  |
| BAC11013.1  | -IVDKIRRK---NCP-ACR--LRKCCQAG-----MVLGG-----  |
| AAQ96833.1  | -IVDKIRRK---NCP-ACR--LRKCCQAG-----MVLGG-----  |
| QRHUP       | -IVDKIRRK---NCP-ACR--LRKCCQAG-----MVLGG-----  |
| PRGR_HUMAN  | -IVDKIRRK---NCP-ACR--LRKCCQAG-----MVLGG-----  |
| NP_000917.2 | -IVDKIRRK---NCP-ACR--LRKCCQAG-----MVLGG-----  |
| AAG09282.1  | -IVDKIRRK---NCP-ACR--LRKCCQAG-----MVLGG-----  |
| CAD89880.1  | -IVDKIRRK---NCP-ACR--LRKCCQAG-----MVLGG-----  |
| PRGR_SHEEP  | -IVDKIRRK---NCP-ACR--LRKCCQAG-----MVLGG-----  |
| PRGR_RABIT  | -IVDKIRRK---NCP-ACR--LRKCCQAG-----MVLGG-----  |
| BAC29608.1  | -IVDKIRRK---NCP-ACR--LRKCCQAG-----MVLGG-----  |
| NP_032855.1 | -IVDKIRRK---NCP-ACR--LRKCCQAG-----MVLGG-----  |
| BAC35662.1  | -IVDKIRRK---NCP-ACR--LRKCCQAG-----MVLGG-----  |
| NP_074038.1 | -IVDKIRRK---NCP-ACR--LRKCCQAG-----MVLGG-----  |
| XP_346819.1 | -IVDKIRRK---NCP-ACR--LRKCCQAG-----MVLGG-----  |
| AAK77950.1  | -IVDKIRRK---NCP-ACR--LRKCCQAG-----MVLGG-----  |
| BAB91074.1  | -IVDKIRRK---NCP-ACR--LRKCCQAG-----MVLGGF----- |
| BAC06585.1  | -IVDKIRRK---NCP-ACR--LRKCCQAG-----MVLGGF----- |
| BAC11012.1  | -IVDKIRRK---NCP-ACR--LRKCCQAG-----MVLGGF----- |
| AAA49039.1  | -IVDKIRRK---NCP-ACR--LRKCCQAG-----MVLGG-----  |
| AAG01366.1  | -IVDKIRRK---NCP-SCR--LRKCCQAG-----MVLGG-----  |
| AAL55260.1  | -IVDKIRRK---NCP-SCR--LRKCCQAG-----MVLGG-----  |
| AAG42362.1  | -IVDKIRRK---NCP-SCR--LRKCCQAG-----MVLGG-----  |
| AAN63590.1  | -IGDKIRRK---NCP-SCR--LRKCCQAG-----MVLGG-----  |
| BAA89539.1  | -IVDKIRRK---NCP-ACR--LRKCYQAG-----MILGG-----  |
| BAC11011.1  | -VVRALDAV---ALPQPVG--VPNESQA-----LSQR-----    |
| GCR_SHEEP   | -----                                         |
| A34721      | -TIDKFRRK---NCP-SCR--LRKCYEAG-----MTLGA-----  |
| ANDR_PANTR  | -TIDKFRRK---NCP-SCR--LRKCYEAG-----MTLGA-----  |
| ANDR_HUMAN  | -TIDKFRRK---NCP-SCR--LRKCYEAG-----MTLGA-----  |
| AAA51775.1  | -TIDKFRRK---NCP-SCR--LRKCYEAG-----MTLGA-----  |
| AAA51780.1  | -TIDKFRRK---NCP-SCR--LRKCYEAG-----MTLGA-----  |
| AAD45921.1  | -TIDKFRRK---NCP-SCR--LRKCYEAG-----MTLGA-----  |
| B34721      | -TIDKFRRK---NCP-SCR--LRKCYEAG-----MTLGA-----  |
| NP_000035.2 | -TIDKFRRK---NCP-SCR--LRKCYEAG-----MTLGA-----  |
| AAA51735.1  | -TIDKFRRK---NCP-SCR--LRKCYEAG-----MTLGA-----  |
| AAA51770.1  | -TIDKFRRK---NCP-SCR--LRKCYEAG-----MTLGA-----  |
| AAA51771.1  | -TIDKFRRK---NCP-SCR--LRKCYEAG-----MTLGA-----  |
| ANDR_MACFA  | -TIDKFRRK---NCP-SCR--LRKCYEAG-----MTLGA-----  |
| ANDR_PAPHA  | -TIDKFRRK---NCP-SCR--LRKCYEAG-----MTLGA-----  |
| AAS19691.1  | -TIDKFRRK---NCP-SCR--LRKCYEAG-----MTLGA-----  |
| AAA51774.1  | -TIDKFRRK---NCP-SCR--LRKCYEAG-----MTLGA-----  |
| AAM96904.1  | -TIDKFRRK---NCP-PCR--LRKCYEAG-----MTLGA-----  |
| AAG37994.1  | -TIDKFRRK---NCP-SCR--LRKCYEAG-----MTLGA-----  |
| AAG40566.1  | -TIDKFRRK---NCP-SCR--LRKCYEAG-----MTLGA-----  |
| ANDR_EULFC  | -TIDKFRRK---NCP-SCR--LRKCYEAG-----MTLGA-----  |

AAQ84563.1 -TIDKFRRK---NCP-SCR--LRKCYEAG-----MTLGA-----  
ANDR\_CANFA -TIDKFRRK---NCP-SCR--LRKCYEAG-----MTLGA-----  
AAK51126.1 -TIDKFRRK---NCP-SCR--LRKCYEAG-----MTLGA-----  
B40494 -TIDKFRRK---NCP-SCR--LRKCYEAG-----MTLGA-----  
NP\_036634.1 -TIDKFRRK---NCP-SCR--LRKCYEAG-----MTLGA-----  
AAA40734.1 -TIDKFRRK---NCP-SCR--LRKCYEAG-----MTLGA-----  
NP\_038504.1 -TIDKFRRK---NCP-SCR--LRKCYEAG-----MTLGA-----  
ANDR\_RABIT -TIDKFRRK---NCP-SCR--LRKCYEAG-----MTLGA-----  
AAB28340.1 -TIDKFRRK---NCP-SCH--LRKCYEAG-----M-----  
AAC97386.1 -TIDKFRRK---NCP-SCR--LRKCYEAG-----MTLGA-----  
AAP85538.1 -TIDKFRRK---NCP-SCR--LRKCYEAG-----MTLGA-----  
AAO61694.1 -TIDKLRRK---NCP-SCR--LRKCFEAG-----MTLGA-----  
BAA33451.1 -TIDKLRRK---NCP-SCR--LRKCFEAG-----MTLGA-----  
AAG48340.1 -TIDKLRRK---NCP-SCR--LKKCFEAG-----MTLGA-----  
AAO83572.1 -TIDKLRRK---NCP-SCR--LKKCFEAG-----MTLGA-----  
AAO83573.1 -TIDKLRRK---NCP-SCR--LKKCFEAG-----MTLGA-----  
AAL92878.1 -TIDKLRRK---NCP-SCR--LKKCFEAG-----MTLGA-----  
BAB20082.1 -TIDKLRRK---NCP-SCR--LKKCFEAG-----MTLGA-----  
BAC98301.1 -TIDKLRRK---NCP-SCR--LKKCFEAG-----MTLGA-----  
BAA32784.1 -TIDKLRRK---NCP-SCR--LRRCFEAG-----MTLGT-----  
BAA32785.1 -TIDKLRRK---NCP-SCR--LRKCFEAG-----MTLGA-----  
BAA83805.1 -TIDKLRRK---NCP-SCR--LKKCFEAG-----MTLGA-----  
AAM09278.1 -TIDKLRRK---NCP-SCR--LRKCFEAG-----MTLGA-----  
BAA75464.1 -TIDKLRRK---NCP-SCR--LKRCFAAG-----MTLGA-----  
JG0194 -TIDKLRRK---NCP-SCR--LKRCFAAG-----MTLGA-----  
AAD25074.1 -TIDKLRRK---NCA-SCR--LKRCFMSG-----MSLKG-----  
BAB20081.1 -TIDKLRRK---NCA-SCR--LKRCFMSG-----MSLKG-----

AAB48082.1 VQNE---RDRISTRSSYEDSSL---PSINALLQAEVL-----  
AAP82997.1 VQNE---RDRISTRSSYEDSSL---PSINALLQAEVL-----  
HN4A\_HUMAN VQNE---RDRISTRSSYEDSSL---PSINALLQAEVL-----  
JC6096 VQNE---RDRISTRSSYEDSSL---PSINALLQAEVL-----  
JC4937 VQNE---RDRISTRSSYEDSSL---PSINALLQAEVL-----  
JC4938 VQNE---RDRISTRSSYEDSSL---PSINALLQAEVL-----  
NP\_000448.3 VQNE---RDRISTRSSYEDSSL---PSINALLQAEVL-----  
AAH39220.1 VQNE---RDRISTRSSYEDSSL---PSINALLQAEVL-----  
BAB03286.1 VQNE---RDRISTRSSYEDSSL---PSINALLQAEVL-----  
CAA54248.1 VQNE---RDRISTRSSYEDSSL---PSINALLQAEVL-----  
CAA61133.1 VQNE---RDRISTRSSYEDSSL---PSINALLQAEVL-----  
A36471 VQNE---RDRISTRSSYEDSSL---PSINALLQAEVL-----  
1705219A VQNE---RDRISTRSSYEDSSL---PSINALLQAEVL-----  
NP\_032287.1 VQNE---RDRISTRSSYEDSSL---PSINALLQAEVL-----  
NP\_071516.1 VQNE---RDRISTRSSYEDSSL---PSINALLQAEVL-----  
NP\_849180.1 VQNE---RDRISTRSSYEDSSL---PSINALLQAEVL-----  
NP\_849181.1 VQNE---RDRISTRSSYEDSSL---PSINALLQAEVL-----  
AAH42224.1 VQNE---RDRISTRSSYEDSSL---PSINVLIQAEVL-----  
HN4A\_XENLA VQNE---RDRISTRSSYEDSSL---PSINVLIQAEVL-----  
AAH56550.1 VQNE---RDRISTRSSYEDSSL---PSINALIQADVL-----  
NP\_919349.1 VQNE---RDRISTRSSYEDSSL---PSINALIQADVL-----  
AAC02906.1 -----  
HN4B\_XENLA VQNE---RDRISMRRSSYEDNGS---LSINVLTQAEAM-----  
CAA89990.2 VQNE---RDRISTRSTFDGSNI---PSINTLAQAEVR-----  
HN4G\_HUMAN VQNE---RDRISTRSTFDGSNI---PSINTLAQAEVR-----  
JC6095 VQNE---RDRISTRSTFDGSNI---PSINTLAQAEVR-----  
NP\_004124.3 VQNE---RDRISTRSTFDGSNI---PSINTLAQAEVR-----  
NP\_991380.1 VQNE---RDRISTRSTFDGSNI---PSINTLAQAEVR-----

HN4G\_MOUSE VQNE---RDRISTRSTYEGSNI---PSINTLAQAEVR-----  
NP\_038948.1 VQNE---RDRISTRSTYEGSNI---PSINTLAQAEVR-----  
AAH54009.1 -----  
NP\_991109.1 VQNE---RDRISCRREN-QGVGT---LTIDVLMQAEAYT-----  
AAB93762.1 VQNE---RDRINCRRPSYEEPTQANGLSVVSLINA-----  
AAB93763.1 VQNE---RDRINCRRPSYEEPTQANGLSVVSLINA-----  
NP\_723413.1 VQNE---RDRISCRRTSNDDPDPGNGLSVISLVKA-----  
S36218 VQNE---RDRISCRRTSNDDPDPGNGLSVISLVKA-----  
NP\_723414.1 VQNE---RDRISCRRTSNDDPDPGNGLSVISLVKA-----  
NP\_476887.2 VQNE---RDRISCRRTSNDDPDPGNGLSVISLVKA-----  
AAC72723.1 VQNE---RDRISCRRTSNDDPDPGNGLSVISLVKA-----  
AAC72724.1 VQNE---RDRISCRRTSNDDPDPGNGLSVISLVKA-----  
AAO39177.1 VQTE---RDRIRPANPLSNGSNGG-IVPDDPLLDLTL-----  
NP\_491103.1 VQTE---RDRIRPANPLSNGSNGG-IVPDDPLLDLTL-----  
CAE60575.1 VQTE---RDRIRPLNVFLNG----KLTEDPLLETLQRAE---  
NP\_492615.2 IQNE---RDAIGKRKKTGAEKE---DLIDQLVAAETL-----  
T25211 IQNE---RDAIGKRKKTGAEKE---DLIDQLVAAETL-----  
CAE60269.1 IQNE---RDAIGKRKKTPEGKE---DLIDQLVQAEQM-----  
AAG15130.1 VQSE---RDVIGKREKKDNMKTY--CQDPTPRTSPEL-----  
NH35\_CAEEL VQSE---RDVIGKREKKDNMKTY--CQDPTPRTSPEL-----  
NP\_508779.3 VQSE---RDVIGKREKKDNMKTY--CQDPTPRTSPEL-----  
T34093 VQSE---RDVIGKREKKDNMKTY--CQDPTPRTSPEL-----  
CAE68607.1 VQSE---RDVIGKREKKDNVKTYT-AHDPTPRTSPE-----  
NP\_496066.2 LQPR---RDLIGCRRIRSRPSCS---TSTPTPPRPQVE-----  
T20416 LQPR---RDLIGCRRIRSRPSCS---TSTPTPPRPQVE-----  
CAE56399.1 LQPR---RDLIGCRRIRSRPSCS---HSTPTPPRAHIE-----  
NP\_492612.1 IQFE---RDPVGSPTSGASLNGT---PFKKDRSPGYEN-----  
NP\_492613.1 IQFE---RDPVGSPTSGASLNGT---PFKKDRSPGYEN-----  
NP\_871798.1 IQFE---RDPVGSPTSGASLNGT---PFKKDRSPGYEN-----  
NP\_871799.1 IQFE---RDPVGSPTSGASLNGT---PFKKDRSPGYEN-----  
AAK17977.1 IQFE---RDPVGSPTSGASLNGT---PFKKDRSPGYEN-----  
AAG15141.1 IQFE---RDPVGSPTSGASLNGT---PFKKDRSPGYEN-----  
AAG15143.1 IQFE---RDPVGSPTSGASLNGT---PFKKDRSPGYEN-----  
CAE60267.1 IQFE---RDPVGSPTGGNSLNGT---PFKKDRSPGYEN-----  
AAP13776.1 IQNE---RDRIGSTKRRKRSGAN---SENNSDSEGTPS-----  
CAE74907.1 IQNE---RDRIGSTKRRKRSGAN---SENNSDSEGTPS-----  
H89591 IQNE---RDRIGSTKRRKRSGAN---SENNSDSEGTPS-----  
NH14\_CAEEL IQNE---RDRIGSTKRRKRSGAN---SENNSDSEGTPS-----  
NP\_741860.1 IQNE---RDRIGSTKRRKRSGAN---SENNSDSEGTPS-----  
NP\_741861.1 IQNE---RDRIGSTKRRKRSGAN---SENNSDSEGTPS-----  
NP\_509116.2 IQFP---SSKNHNEADDMDSGDE---DSNIQDDKSLAL-----  
T34118 IQFP---SSKNHNEADDMDSGDE---DSNIQDDKSLAL-----  
CAE65766.1 IQFPGAGTKQSHAEADEQDSADD---ESPGNGQEC-----  
CAE65768.1 IQTN---DSLGNNAVVTKIVGKR---KNSADDSLPS-----  
AAD31548.2 VQGD---IDTASTSSASP NLVSVEMHPYTKEVEECQ-----  
D88206 VQGD---IDTASTSSASP NLVSVEMHPYTKEVEECQ-----  
AAD03691.1 VQGD---IDTASTSSASP NLVSVEMHPYTKEVEECQ-----  
AAO38653.1 VQGD---IDTASTSSASP NLVSVEMHPYTKEVEECQ-----  
NP\_495534.3 VQGD---IDTASTSSASP NLVSVEMHPYTKEVEECQ-----  
AAO38655.1 VQGD---IDTASTSSASP NLVSVEMHPYTNFREVE-----  
CAE67598.1 VQGD---TSDSASTSSSPNMVSYDSKIYTKAEACQ-----  
AAG15158.1 VQGD---TVEDPEWDEEAMPETLSISTQTDALKVK-----  
AAG15160.1 VQGD---TVEDPEWDEEAMPETLSISTQTDALKVK-----  
NP\_497073.1 VQGD---TVEDPEWDEEAMPETLSISTQTDALKVK-----  
NP\_497074.1 VQGD---TVEDPEWDEEAMPETLSISTQTDALKVK-----  
CAE60603.1 VQGD---TPDFPEPMEMDEDSIADKETQTDLSEKL-----  
AAG15162.1 VQSE---RVEREQNGSPNQ---IEEDDYKDLSSPDTCS-----

AAG15163.1 VQSE---RVEREQNGSPNQ---IEEDDYKDLSSPDTCS-----  
NP\_492607.1 VQSE---RVEREQNGSPNQ---IEEDDYKDLSSPDTCS-----  
T23558 VQSE---RVEREQNGSPNQ---IEEDDYKDLSSPDTCS-----  
CAE60279.1 VQS-----EREQKGS PDQNQDVEEDDYKDLSSPDTCS-----  
NP\_501775.1 VQNE---RDRNAKNGG-MG-GPMS SPTQSSLCKELTI-----  
T21645 VQNE---RDRNAKNGG-MG-GPMS SPTQSSLCKELTI-----  
CAE59975.1 VQNE---RDRNAKNGGGMGMGPMQSPIQITPSKES-----  
NP\_510201.2 VQPK---REVHTSNGSFDQ-NDPDYDLRLGGTRTSP-----  
T23520 VQPK---REVHTSNGSFDQ-NDPDYDLRLGGTRTSP-----  
AAO39173.1 VQPK---REVHTSNGSFDQ-NDPDYDLRLGGTRTSP-----  
CAE61407.1 VQPK---REVVT SNGSFDQ-NDQDYE-RLGGTTTSPN-----  
AAM69090.1 IQHD---RDKIR-YTKALKKKKREEEKRLKEMVIKED-----  
NP\_741729.1 IQHD---RDKIR-YTKALKKKKREEEKRLKEMVIKED-----  
NH40\_CAEEEL IQHD---RDKIR-YTKALKKKKREEEKREEMHAMLID-----  
CAE58853.1 IQHD---RDKIR-YTKALKKKKREEEKREEMHAMLID-----  
T16793 YRSN---MIETKSDIRKLSKRNGKKNENDHHSY-----  
AAO39201.1 LQQN---RDPIG-YTKRTRR--PKKELKTTSDCSSDEG-----  
AAO39202.1 LQQN---RDPIG-YTKRTRR--PKKELKTTSDCSSDEG-----  
AAO39203.1 LQQN---RDPIG-YTKRTRR--PKKELKTTSDCSSDEG-----  
AAO27833.1 LQQN---RDPIG-YTKRTRR--PKKELKTTSDCSSDEG-----  
NP\_504164.1 LQQN---RDPIG-YTKRTRR--PKKELKTTSDCSSDEG-----  
CAE58326.1 LQQS---RDPIG-YTKRTRR--PKKEMKNVEGSSDESS-----  
AAO39172.1 IQQN---RDPIG-YTKRTRRYPPIKKVEASDECSPA-----  
NP\_498554.1 IQQN---RDPIG-YTKRTRRYPPIKKVEASDECSPA-----  
CAE70133.1 IQQN---RDPIG-YTKRTRRYPPVKKIEASEECSPS-----  
AAO39181.1 LQAS---RDPIG-YTKRNKK--TLRHPMNELSGDESNS-----  
NP\_505936.1 LQAS---RDPIG-YTKRNKK--TLRHPMNELSGDESNS-----  
CAE75338.1 LQAS---RDPIG-YTKRTRK--PEFQPANSINSDENN-----  
AAO39189.1 LQAS---RDRIG-YTKRTRK--PKTKDVSFSSSEMSP-----  
NP\_505935.2 LQAS---RDRIG-YTKRTRK--PKTKDVSFSSSEMSP-----  
CAE75339.1 LQAS---RDRIG-YTKRTRK--PKRKEVSFSSSEMSP-----  
NP\_510834.2 IQND---RDRIG-PTKKIKMSSGSDDEQATTPHRLQ-----  
T28881 IQND---RDRIG-PTKKIKMSSGSDDEQATTPHRLQ-----  
AAP46279.1 IQND---RDRIG-PTKKIKMSSGSDDEQATTPHRLQ-----  
AAO39167.1 IQND---RDRIG-PTKKIKMSSGSDDEQATTPHRLQ-----  
CAE58689.1 IQND---RDRIG-PTKKVKMSSGSDDEQATTPHRLQ-----  
AAO39170.1 IQND---RDRIG-PTKKIKMSSGSDDEQATT-----  
AAP46278.1 IQND---RDRIG-PTKKIKMSSGSDDEQATT-----  
NHR1\_CAEEEL IQND---RDRIG-PTKKIKMSSGSDDEQATT-----  
NP\_504455.1 IQND---RDRIG-YTKRKRHHDDNDMEGGVHHSEHI-----  
T33174 IQND---RDRIG-YTKRKRHHDDNDMEGGVHHSEHI-----  
G89050 IQND---RDRIG-YTKRKRHHDDNDMEGGVHHSEHI-----  
CAE64622.1 IQRD---RDRIG-YTKRKRKHDDDDKEE-THHFENLH-----  
NP\_504453.1 -----CKFLV-YFEI-----MEGS-----  
CAE57227.1 LSME---RRRKR---KKLNGIEGLEERYETTNPILNLL-----  
NP\_510115.1 LSME---RRRKR---KKLNGLEGSEESWETEDALINLL-----  
AAG15127.1 VRPD---RDQTGKQKVPRIKKKQIDEELLNHHMRL-----  
NP\_741456.1 VRPD---RDQTGKQKVPRIKKKQIDEELLNHHMRL-----  
AAG15128.1 VRPD---RDQTGKQKVPRIKKKQIDEELLNHHMRL-----  
CAE70940.1 VRPD---RDQTGKQKVPRIKKKQIDEDLLNHHMRL-----  
AAM81108.1 -----QSGRIGIRQENRK-FQELRRSKLMRSF-----  
CAE72428.1 YSSR---YCRFKKCEIVGMDPKAVRPDR-DATGRHYQGRQ---  
NP\_494368.1 -TSR---FCRFKKCEIVGMDPKAVRPDR-DATGRHYQG-----  
CAE62036.1 VRPD---REKSKKGKTLSSKKSLSRSMSNRMAI-----  
NP\_502117.2 VRPD---REKSKKGKTVLSKKS SVSRSLSYRLAD-----  
AAG15179.1 IRPD---RDVIGKQKNPRKKMKMKS--DTNSGSIDASL-----  
AAR30203.1 IRPD---RDVIGKQKNPRKKMKMKS--DTNSGSIDASL-----

AAO21381.1 IRPD---RDVIGKQKNPRKKMKMS--DTNSGSIDASL-----  
NP\_494413.2 IRPD---RDVIGKQKNPRKKMKMS--DTNSGSIDASL-----  
CAE72436.1 IRPD---RDVIGKQKNPRKKMKAE-NSNDASLPSP-----  
CAE63197.1 IRPD---RDKTGRQKNPRRNADGS IKKNSNASILG-----  
NP\_510423.1 IRPD---RDKTGRQKNPRRNTEGS IKKVS VGSILG-----  
AAC24264.2 STTR---HNLRLINIYVQTS--AES-TPKSSKDTEMGVA-----  
NP\_501348.1 STTR---HNLRLINIYVQTS--AEKRQTKRRMITQKGT-----  
CAE70941.1 IRGK---YNSTSTDYERSSSSAES-TPKSSKDTELG-----  
AAG15129.1 VQSE---RDKHKKNPKDSNNEGSTSPQYPTASTPI-----  
T22948 VQSE---RDKHKKNPKDSNNEGSTSPQYPTASTPI-----  
NP\_741480.1 VQSE---RDKHKKNPKDSNNEGSTSPQYPTASTPI-----  
CAC70099.2 VQSE---RDKHKKNPKDSNNEGSTSPQYPTASTPI-----  
CAE46673.1 VQSE---RDKHKKNPKDSNNEGSTSPQYPTASTPI-----  
CAE74760.1 VQSE---RDKHKKNPKD---DESGSPTYPTSATPISIP-----  
CAC70072.3 VQSE---RE---IRPNETAKKPKGSLKGKRSSLQTSNS-----  
NP\_501730.2 VQSE---RE---IRPNETAKKPKGSLKGKRSSLQTSNS-----  
CAE69003.1 VQSE---RHPAKIGEIEPAKMPK-HPKAAKMNYRTK-----  
NP\_501731.1 VRSE---RTRKIKTEIDGDVKLEIKEEPADSEAD-----  
T19540 VRSE---RTRKIKTEIDGDVKLEIKEEPADSEAD-----  
CAE69004.1 VRTE---RKKKTPDLDNKTIKMEIKEEIDTDSDDD-----  
NP\_504213.1 IRNK---RAKR-KSQPESPCTEEIENRALSWQTEAI-----  
AAD05225.1 VQ-----HERGPRKPKLHPQLHHHHHHAAAAA-----  
NP\_477140.1 VQ-----HERGPRKPKLHPQLHHHHHHAAAAA-----  
XP\_318587.1 VT-----PHPPPPPPPLVPHPIALTALPPEGPT-----  
AAF71999.1 VQ-----HERGPRNSTLRRQQMSSYYNESRVMMSP-----  
AAF74116.1 VQ-----HERGPRNSTLRRQQMSSYYNESRVMMSP-----  
AAO39180.1 VQ-----HERGPRNSSLRRQQMMFDHGSSPNS-----  
NP\_502094.1 VQ-----HERGPRNSSLRRQQMMFDHGSSPNS-----  
CAE62015.1 VQ-----HERGPRNSSLRRQQMMFEHGSSPHS-----  
B47265 VQ-----HERGPRNSTLRRHMAMY--KDAMMGAAEMP-----  
TLL\_DROVI VQ-----HERGPRNSTLRRHMAMY--KDAMMGAAEMP-----  
NP\_524596.1 VQ-----HERGPRNSTLRRHMAMY--KDAMMGAGEMP-----  
XP\_316782.1 VQ-----HERGPRSSTLRKQMALFISKDSPL-RHDM-----  
AAM61763.1 VQ-----HERGPRTSTIRKQVALYFRGHKEVNGSA-----  
NR21\_ORYLA VQ-----HERGPRTSTIRKQVALYFRGHKEVNGSS-----  
NR21\_XENLA VQ-----HERGPRTSTIRKQVALYFRGHKEVNGST-----  
NP\_003260.1 VQ-----HERGPRTSTIRKQVALYFRGHKEENGAA-----  
NP\_689415.1 VQ-----HERGPRTSTIRKQVALYFRGHKEDNGAA-----  
NP\_990501.1 VQ-----HERGPRTSTIRKQVALYFRGHKEESSGA-----  
AAP79295.1 VQ-----HERGPRNSTIRKQMALYLKETTGRDDVT-----  
AAL29193.1 VQ-----HERGPRSSTLRKQKMLKEAQERMEIAT-----  
NP\_055064.1 VQ-----NERQPRSTAQVHLDSMESNTESRPESLVA-----  
NP\_057430.1 VQ-----NERQPRSTAQVHLDSMESNTESRPESLVA-----  
NP\_038736.1 VQ-----NERQPRSTAQVHLDSMESNTESRPESLVA-----  
AAF15392.2 VQ-----NERQPRSTAQVRMDSVESETEPRLQPLAT-----  
NP\_989925.1 VQ-----NERQPRSTAQVRLDSIELDAELPPEHVAA-----  
NP\_508547.1 VQ-----NERQPRNTATIRP-ALDMDPQNFFREYAGA-----  
T29238 VQ-----NERQPRNTATIRP-ALDMDPQNFFREYAGA-----  
CAE68391.1 VQ-----NERQPRNTATIRP-AIDMDPQNFFREYAGA-----  
NP\_611032.1 E-----VDETEERNSCQAGTGRCVVDKAHRNQC-----  
XP\_305999.1 -----  
NP\_725457.1 DSIDV-TNDNEEPHAVSRSDSSFIMPQFMSPN-----  
XP\_319010.1 -----  
XP\_345117.1 LP-----ASSPLTTVRPASQOC PGVCPAAAGR TD-----  
CAE65008.1 VQ-----NERGPRKLR-CITIPRINNLNSFKYDMIFS-----  
NP\_497579.1 FF-----SSTHGKAK- IWGPTNIRPPTS YGFRAP-----  
NP\_649647.1 VQ-----EERGPRNQVALYRTGRRQAPPSQAAPSP-----

XP\_307951.1 VQ-----QERGPRKGRKMVLMACIRQVRHNEHFAIF-----  
CAE70300.1 VQ-----HERLDTPPRSTAPAVRTKKVKKIKLPETID-----  
XP\_321796.1 VQ-----HERAPRNCTPLTATVSGLSAHGDYYAARTS-----  
CAB05521.2 VQ-----PERTSHSYTVEYVELPSFREYSKGLLPTH-----  
NP\_507060.1 VQ-----PERTSHSYTVEYVELPSFREYSKGLLPTH-----  
1411299B VLDDSKR-VAKRKLIEQNR-ERRRKEEMIRSL-----  
CAA68539.1 VLDDSKR-VAKRKLIEQNR-ERRRKEEMIRSL-----  
AAH35137.1 VLDDSKR-VAKRKLIEQNR-ERRRKEEMIRSL-----  
TVRTAR VLDDSKR-VAKRKLIEQNR-ERRRKEEMIRSL-----  
XP\_126580.1 VLDDSKR-VAKRKLIEQNR-ERRRKEEMIRSL-----  
THA1 SHEEP VLDDSKR-VAKRKLIEQNR-ERRRKEEMIRSL-----  
THA\_MOUSE VLDDSKR-VAKRKLIEQNR-ERRRKEEMIRSL-----  
THA\_PIG VLDDSKR-VAKRKLIEQNR-ERRRKEEMIRSL-----  
S06410 VLDDSKR-VAKRKLIEQNR-ERRRKEEMIRSL-----  
S06907 VLDDSKR-VAKRKLIEQNR-ERRRKEEMIRSL-----  
S09178 VLDDSKR-VAKRKLIEQNR-ERRRKEEMIRSL-----  
S14417 VLDDSKR-VAKRKLIEQNR-ERRRKEEMIRSL-----  
S14418 VLDDSKR-VAKRKLIEQNR-ERRRKEEMIRSL-----  
NP\_955366.1 VLDDSKR-VAKRKLIEQNR-ERRRKEEMIRSL-----  
NP\_835161.1 VLDDSKR-VAKRKLIEQNR-ERRRKEEMIRSL-----  
CAA31237.1 VLDDSKR-VAKRKLIEQNR-ERRRKEEMIRSL-----  
CAA38899.1 VLDDSKR-VAKRKLIEQNR-ERRRKEEMIRSL-----  
CAA06701.1 VLDDSKR-VAKRKLIEQNR-ERRRKEEMIRSL-----  
CAB57886.1 VLDDSKR-VAKRKLIEQNR-ERRRKEEMIRSL-----  
NP\_003241.2 VLDDSKR-VAKRKLIEQNR-ERRRKEEMIRSL-----  
NP\_112396.1 VLDDSKR-VAKRKLIEQNR-ERRRKEEMIRSL-----  
QRMSA1 VLDDSKR-VAKRKLIEQNR-ERRRKEEMIRSL-----  
A44776 VLDDSKR-VAKRKLIEENR-ERRRKEEMIKSL-----  
CAA36459.1 VLDDSKR-VAKRKLIEENR-ERRRKEEMIKSL-----  
AAA42393.1 VLDDSKR-VAKRKLIEENR-ERRRKEEMIKSL-----  
TVFVVR VLDDSKR-VAKRKLIEENR-ERRRKEEMIKSL-----  
AAA42397.1 VLDDSKR-VAKRKLIEENR-ERRRKEEMIKSL-----  
AAA42398.1 VLDDSKR-VAKRKLIEENR-ERRRKEEMIKSL-----  
ERBA AVIER VLDDSKR-VAKRKLIEENR-ERRRKEEMIKSL-----  
CAA68260.1 VLDDSKR-VAKRKLIEENR-ERRRKEEMIKSL-----  
CAA05310.1 VLYDSKR-VAKRKLIEENR-ERRRKEEMIKSL-----  
THA PYGAD VLYDSKR-VAKRKLIEENR-ERRRKEEMIKSL-----  
CAA28545.1 VLDDSKR-VAKRKLIEENR-ERRRKEEMIKSL-----  
THA CAIMO VLDDSKR-VAKRKLIEENR-ERRRKEEMIKSL-----  
CAA05339.1 VLDDSKR-VAKRKLIEENR-ERRRKEEMIKSL-----  
NP\_990644.1 VLDDSKR-VAKRKLIEENR-ERRRKEEMIKSL-----  
THA APTPA VLDDSKR-VAKRKLIEENR-ERRRKEEMIKSL-----  
THAB XENLA VLDDSKR-VAKRKLIEENR-VRRRKEEMIKTL-----  
TVXLTA VLDDSKR-VAKRKLIEENR-QRRRKEEMIKTL-----  
THA RANCA VLDDSKR-VAKRKLIEENR-ERRRKEEMIKTL-----  
THAA XENLA VLDDGKR-VAKRKLIEENR-QRRRKEEMIKTL-----  
B36067 DLDDSKR-VAKRKLIEEDR-VRRRKEEMIKTL-----  
AAO47435.1 VLDDSKR-VAKRKLIEENR-ERRRKEEMLKSM-----  
THAA PAROL VLDDSKR-VAKRRLIEENR-EKRKREEMVRTL-----  
THA HIPHI VLDDSKR-VAKRRLIEENR-EKRKREEMVRTL-----  
BAD11772.1 VLDDSKR-VAKRRLIEENR-EKRKKEEMVKSL-----  
NP\_571471.1 VLDDSKR-VAKRRLIEENR-EKRKKEEIVKTL-----  
THAB PAROL VLDDSKR-VAKRRLIEENR-ERRKKEEIVKTL-----  
THA SALSA VLDDSKR-VAKRRLIEENR-EKRKKEEIVKTL-----  
THB1 MOUSE VLDDSKR-LAKRKLIEENR-EKRRREELQKSI-----  
THB2 RAT VLDDSKR-LAKRKLIEENR-EKRRREELQKSI-----  
THB1 RAT VLDDSKR-LAKRKLIEENR-EKRRREELQKSI-----

|             |                                       |
|-------------|---------------------------------------|
| AAA40916.1  | VLDDSKR-LAKRKLIEENR-EKRRREELQKSI----- |
| NP_036804.1 | VLDDSKR-LAKRKLIEENR-EKRRREELQKSI----- |
| NP_033406.1 | VLDDSKR-LAKRKLIEENR-EKRRREELQKSI----- |
| THB2_HUMAN  | VLDDSKR-LAKRKLIEENR-EKRRREELQKSI----- |
| TVHUAR      | VLDDSKR-LAKRKLIEENR-EKRRREELQKSI----- |
| NP_000452.2 | VLDDSKR-LAKRKLIEENR-EKRRREELQKSI----- |
| 2NLLB       | VLDDSKR-LAKRKLIEENR-EKRRREELQKSI----- |
| CAB42095.1  | VLDDSKR-LAKRKLIEENR-EKRRREELQKSI----- |
| THB1_SHEEP  | VLDDSKR-LAKRKLIEENR-EKRRREELQKSI----- |
| NP_990778.1 | VLDDSKR-LAKRKLIEENR-EKRRREELQKSI----- |
| TVCHTB      | VLDDSKR-LAKRKLIEENR-EKRRREELQKSI----- |
| THB_CHICK   | VLDDSKR-LAKRKLIEENR-EKRRREELQKSI----- |
| AAA49654.1  | VLDDSKR-LAKRKLIEENR-EKRRREELQKSI----- |
| THBA_XENLA  | VLDDSKR-LAKRKLIEENR-EKRRREELQKSI----- |
| AAL13127.1  | VLDDSKR-LAKRKLIEENR-EKRRREELQKSI----- |
| THB_RANCA   | VLDDSKR-LAKRKLIEENR-EKRRREELQKSI----- |
| D36067      | VLDDSKR-LAKRKLIEENR-EKRRREELQKSI----- |
| THBB_XENLA  | VLDDSKR-LAKRKLIEENR-EKRRREELQKSI----- |
| AAO47436.1  | VLDDSKR-LAKRKLIEENR-EKRRREELQKSI----- |
| AAO62999.1  | VLDDSKR-LAKRKLIEENR-EKRRREELQKSI----- |
| AAD38691.1  | VLDDSKR-LAKRKLIEENR-EKRRREELQKSI----- |
| AAL06731.1  | VLDDSKR-LAKRKLIEENR-EKRRREELQKSI----- |
| AAL06732.1  | VLDDSKR-LAKRKLIEENR-EKRRREELQKSI----- |
| AAO86517.1  | VLDDSKR-LAKRKLIEENR-EKRRREELQKSI----- |
| THB_PAROL   | VLDDSKR-LAKRKLIEENR-EKRRREELQKSI----- |
| NP_571415.1 | VLDDSKR-LAKRKLIEENR-EKRRREELQKSI----- |
| BAD11773.1  | VLDDSKR-LAKRKLIEENR-EKRRREELQKSI----- |
| S06163      | VLDDSKR-LAKRKLIEENR-EKRRREELQKSI----- |
| AAC42665.1  | VLDDSKR-LAKRKLIEENR-EKRRREELQKSI----- |
| BAB68358.1  | VLDDSKR-LAKRKLIEENR-EKRRREELQKSI----- |
| NHR1_ONCVO  | VLDDSKR-LAKRKLIEENR-EKRRREELQKSI----- |
| AAF68669.1  | VLDDSKR-LAKRKLIEENR-EKRRREELQKSI----- |
| CAE72381.1  | VLDDSKR-LAKRKLIEENR-EKRRREELQKSI----- |
| 1401244A    | VLDDSKR-LAKRKLIEENR-EKRRREELQKSI----- |
| 1408258A    | VLDDSKR-LAKRKLIEENR-EKRRREELQKSI----- |
| RRB_HUMAN   | VLDDSKR-LAKRKLIEENR-EKRRREELQKSI----- |
| NP_000956.2 | VLDDSKR-LAKRKLIEENR-EKRRREELQKSI----- |
| CAA68398.1  | VLDDSKR-LAKRKLIEENR-EKRRREELQKSI----- |
| CAA30262.1  | VLDDSKR-LAKRKLIEENR-EKRRREELQKSI----- |
| AAL02361.1  | VLDDSKR-LAKRKLIEENR-EKRRREELQKSI----- |
| RRB_MOUSE   | VLDDSKR-LAKRKLIEENR-EKRRREELQKSI----- |
| NP_035373.1 | VLDDSKR-LAKRKLIEENR-EKRRREELQKSI----- |
| CAA05769.1  | VLDDSKR-LAKRKLIEENR-EKRRREELQKSI----- |
| 1504304A    | VLDDSKR-LAKRKLIEENR-EKRRREELQKSI----- |
| RRB_NOTVI   | VLDDSKR-LAKRKLIEENR-EKRRREELQKSI----- |
| NP_990657.1 | VLDDSKR-LAKRKLIEENR-EKRRREELQKSI----- |
| RRB_COTJA   | VLDDSKR-LAKRKLIEENR-EKRRREELQKSI----- |
| S13512      | VLDDSKR-LAKRKLIEENR-EKRRREELQKSI----- |
| CAA40615.1  | VLDDSKR-LAKRKLIEENR-EKRRREELQKSI----- |
| CAA40616.1  | VLDDSKR-LAKRKLIEENR-EKRRREELQKSI----- |
| A43786      | VLDDSKR-LAKRKLIEENR-EKRRREELQKSI----- |
| AAB19628.1  | VLDDSKR-LAKRKLIEENR-EKRRREELQKSI----- |
| AAA60126.1  | VLDDSKR-LAKRKLIEENR-EKRRREELQKSI----- |
| AAB00112.1  | VLDDSKR-LAKRKLIEENR-EKRRREELQKSI----- |
| NP_000955.1 | VLDDSKR-LAKRKLIEENR-EKRRREELQKSI----- |
| AAB00113.1  | VLDDSKR-LAKRKLIEENR-EKRRREELQKSI----- |
| AAB19602.2  | VLDDSKR-LAKRKLIEENR-EKRRREELQKSI----- |

|             |                                           |
|-------------|-------------------------------------------|
| AAB29813.1  | VRNDRNKKKK-EVPKPECS-ESYTLTPEVGELIE-----   |
| AAC33511.1  | VRNDRNKKKK-EVPKPECS-ESYTLTPEVGELIE-----   |
| AAD05222.1  | VRNDRNKKKK-EVPKPECS-ESYTLTPEVGELIE-----   |
| AAF65452.1  | VRNDRNKKKK-EVPKPECS-ESYTLTPEVGELIE-----   |
| CAA29787.1  | VRNDRNKKKK-EVPKPECS-ESYTLTPEVGELIE-----   |
| NP_113716.1 | VRNDRNKKKK-ETPKPECS-ESYTLTPEVGELIE-----   |
| CAA05767.1  | VRNDRNKKKK-EAPKPECS-ESYTLTPEVGELIE-----   |
| CAA05768.1  | VRNDRNKKKK-EAPKPECS-ESYTLTPEVGELIE-----   |
| CAA71177.1  | VRNDRNKKKK-EAPKPECS-ESYTLTPEVGELIE-----   |
| AAL02360.1  | VRNDRNKKKK-EAAKPECS-ESYTLTPEVGELIE-----   |
| CAA40749.1  | VRNDRNKKKK-EAPKPECS-ESYTLTPEVGELIE-----   |
| RRA_MOUSE   | VRNDRNKKKK-EAPKPECS-ESYTLTPEVGELIE-----   |
| NP_033050.1 | VRNDRNKKKK-EAPKPECS-ESYSLTPEVGELIE-----   |
| I50674      | VRNDRNKKKK-DVPKTECS-ESYIVTPEVEELIE-----   |
| NP_989867.1 | VRNDRNKKKK-DVPKTECS-ESYIVTPEVEELIE-----   |
| CAA55132.1  | VRNDRNKKKK-DVPKTECS-ESYIVTPEVEELIE-----   |
| RRA_NOTVI   | VRNDRNKKKKQEAPKQECT-ESYIITPEVEDLV-----    |
| S78481      | VRNDRNKKKKQEAPKQECT-ESYIITPEVEDLV-----    |
| AAA50050.1  | VRNDRNKRKK-DDKKQECL-ENYVLSPDTEKMIE-----   |
| AAH49301.1  | VRNDRNKRKK-DDKKQECL-ENYVLSPDTEKMIE-----   |
| CAB43871.1  | VRNDRNKKKK-DEKKPECI-ENYVLSPDTEQMIN-----   |
| RRA_FUGRU   | VRNDRNKKKK-DEKKPECI-ENYVLSPDTEQMIN-----   |
| I51256      | VRNDRNKKKK-EEKKPECT-ENYTLSPDTEQMID-----   |
| NP_571481.1 | VRNDRNKKKK-EEKKPECT-ENYTLSPDTEQMID-----   |
| 1DSZA       | VRNDRNKKKK-----                           |
| A41977      | VRNDRNKKKK-ESPKPEAI-ESYILSPETQDLIE-----   |
| A56558      | VRNDRNKKKK-ESPKPEAI-ESYILSPETQDLIE-----   |
| RRA_XENLA   | VRNDRNKKKK-ESPKPEAI-ESYILSPETQDLIE-----   |
| B56558      | VRNDRNKKKK-EPPKVDVM-ESYVLSPETQDLIE-----   |
| CAB60726.1  | VRNDRNKKKK-EVKEEGSP-DSYELSPQLEELIT-----   |
| RRG2_HUMAN  | VRNDRNKKKK-EVKEEGSP-DSYELSPQLEELIT-----   |
| RRG2_MOUSE  | VRNDRNKKKK-EVKEEGSP-DSYELSPQLEELIT-----   |
| A34714      | VRNDRNKKKK-EVKEEGSP-DSYELSPQLEELIT-----   |
| NP_035374.2 | VRNDRNKKKK-EVKEEGSP-DSYELSPQLEELIT-----   |
| AAH19098.2  | VRNDRNKKKK-EVKEEGSP-DSYELSPQLEELIT-----   |
| AAH64524.1  | VRNDRNKKKK-EVKEEGSP-DSYELSPQLEELIT-----   |
| NP_000957.1 | VRNDRNKKKK-EVKEEGSP-DSYELSPQLEELIT-----   |
| AAH13709.1  | VRNDRNKKKK-EVKEEGLP-DSYELSPQLEELIT-----   |
| XP_217064.2 | VRNDRNKKKK-EVKEEGPP-DNYELSPQLEELIT-----   |
| AAL02362.1  | VRNDRNKKKK-EVKEECSP-DSYELSPQLEELIT-----   |
| CAA52153.2  | VRNDRNKKKK-EVKEEAA--DSPELSPALEEELIQK----- |
| A38592      | VRNDRNKKKK-EIKEEVVLPDSYEMPPEMEELI-----    |
| RRG_XENLA   | VRNDRNKKKK-EIKEEVVLPDSYEMPPEMEELI-----    |
| AAB47115.1  | VRNDRNKKKK-EIKEEVVLPDSYEMPPEMEELI-----    |
| AAB47116.1  | VRNDRNKKKK-EIKEEVVLPDSYEMPPEMEELI-----    |
| RRG_NOTVI   | VRNDRNKKKK-EIKEEVVT-DSYEMPPEMEALIQ-----   |
| S06124      | VRNDRNKKKK-EIKEEVVT-DSYEMPPEMEALIQ-----   |
| CAA49562.1  | VRNDRNKKKK-EIKEEVVT-DSYEMPPEMEALIQ-----   |
| AAF80975.1  | VRNDRNKKKK-EIKEEVVT-DSYEMPPEMEALIA-----   |
| AAF80976.1  | VRNDRNKKKK-EIKEEVVT-DSYEMPPEM-----        |
| AAB59953.1  | VRNDRNKKKK-DVKDEVIPPESEYELSGELEELV-----   |
| NP_571414.1 | VRNDRNKKKK-DVKDEVIPPESEYELSGELEELV-----   |
| AAF80974.1  | VRNDRNK-----                              |
| 1HRA        | VRN-----                                  |
| AAM46149.1  | VRNDRNKKRDKTQSLEKHTLSYNWTPEIQTI-----      |
| BAA25569.1  | VRNDRNKKRG---KEKDGKTGDTSPSQPEEIVVT-----   |
| A56856      | VKFGRMSSKKQRDSLVAEVQKHRMQQQQORDHQQ-----   |

NP\_002934.1 VKFGRMSKKQRDSLAEVQKHRMQQQQORDHQQ-----  
XP\_217192.2 VKFGRMSKKQRDSLAEVQKHRMQQQQORDHQQ-----  
CAB05396.1 VKFGRMSKKQRDSLAEVQKHRMQQQQORDHQQ-----  
BAA22970.1 VKFGRMSKKQRDSLAEVQKHRMQQQQORDHQQ-----  
NP\_038674.1 VKFGRMSKKQRDSLAEVQKHRMQQQQORDHQQ-----  
NP\_599022.1 VKFGRMSKKQRDSLAEVQKHRMQQQQORDHQQ-----  
NP\_599023.1 VKFGRMSKKQRDSLAEVQKHRMQQQQORDHQQ-----  
NP\_599024.1 VKFGRMSKKQRDSLAEVQKHRMQQQQORDHQQ-----  
CAA69930.1 VKFGRMSKKQRDSLAEVQKRRMQQQQORDHQQ-----  
AAH58269.1 VKFGRMSKKQRDSLAEVQKHQORLQEQRQQQ-----  
NP\_990424.1 VKFGRMSKKQRDSLAEVQKHQORLQEQRQQQ-----  
CAD13276.1 VKFGRMSKKQRDSLAEVQKHQORLQEQRQQQ-----  
XP\_219749.2 VKFGRMSKKQRDSLAEVQKHQORLQEQRQQQ-----  
I65219 VKFGRMSKKQRDSLAEVQKHQORLQEQRQQQ-----  
RORB\_RAT VKFGRMSKKQRDSLAEVQKHQORLQEQRQQQ-----  
NP\_008845.2 VKFGRMSKKQRDSLAEVQKHQORLQEQRQQQ-----  
RORB\_HUMAN VKFGRMSKKQRDSLAEVQKHQORLQEQRQQQ-----  
AAB02582.1 VKFGRMSKKQRDSLAEVQKQLQQQQQQEQVA-----  
AAD46913.1 VKFGRMSKKQRDSLAEVQKQLQQQQQQEQVA-----  
AAH14804.1 VKFGRMSKKQRDSLAEVQKQLQQQQQQEQVA-----  
NP\_035411.1 VKFGRMSKKQRDSLAEVQKQLQQQQQQEQVA-----  
CAA10661.1 VKFGRMSKKQRDSLAEVQKQLQQQQQQEQVA-----  
XP\_227436.2 VKFGRMSKKQRDSLAEVQKQLQQQQQREQVA-----  
XP\_347323.1 VKFGRMSKKQRDSLAEVQKQLQQQQQREQVA-----  
CAD38900.1 VKFGRMSKKQRDSLAEVQKQLQQRQQQQQEP-----  
RORG\_HUMAN VKFGRMSKKQRDSLAEVQKQLQQRQQQQQEP-----  
NP\_005051.2 VKFGRMSKKQRDSLAEVQKQLQQRQQQQQEP-----  
AAB54059.1 VKFGRMSKKQREKVEDEGRFHRAQMREGQTDAP-----  
AAC47163.1 VKFGRMSKKQREKVEDEGRFHRAQMREGQTDAP-----  
AAF36970.1 VKFGRMSKKQREKVEDEVRFHRAQMRAQSDAA-----  
NP\_788301.1 VKFGRMSKKQREKVEDEVRFHRAQMRAQSDAA-----  
NP\_788302.1 VKFGRMSKKQREKVEDEVRFHRAQMRAQSDAA-----  
NP\_788303.1 VKFGRMSKKQREKVEDEVRFHRAQMRAQSDAA-----  
XP\_319750.1 VKFGRMSKKQREKVEDEVRFHRAQMRAQNDAA-----  
AAK14384.2 VKFGRMSKKQREKVEDEVRFHRAQMRAQTDTA-----  
HR3\_GALME VKFGRMSKKQREKVEDEVRYHRAQMRAQTDAA-----  
AAK62804.1 VKFGRMSKKQREKVEDEVRYHKAQMRVQADAA-----  
HR3\_MANSE VKFGRMSKKQREKVEDEVRYHKAQMRAQNDAA-----  
BAA89260.1 -----  
NP\_740887.1 VKFGRMSKKQREKVEDEVRMHKELAAN-GLGYQ-----  
NP\_740888.1 VKFGRMSKKQREKVEDEVRMHKELAAN-GLGYQ-----  
AAK17973.1 VKFGRMSKKQREKVEDEVRMHKELAAN-GLGYQ-----  
I45067 VKFGRMSKKQREKVEDEVRMHKELAAN-GLGYQ-----  
CAE74244.1 VKFGRMSKKQREKVEDEVRMHKQLAEASGLGY-----  
T18848 VKFGRMSKKQREKVEDEVFTFPILNFVFMSSF-----  
T30318 -----  
A30226 VRFGRIPKREKQRMLAEMQNAMN-LANNQLSS-----  
NP\_665718.1 VRFGRIPKREKQRMLAEMQNAMN-LANNQLSS-----  
AAH62047.1 VRFGRIPKREKQRMLAEMQNAMN-LANNQLSS-----  
NP\_068370.1 VRFGRIPKREKQRMLAEMQSAMN-LANNQLSS-----  
NP\_663409.1 VRFGRIPKREKQRMLAEMQSAMN-LANNQLSS-----  
CAB53540.1 VRFGRIPKREKQRMLAEMQSAMN-LANNQLSS-----  
1HLZ VRFGRIPKREKQRM-----  
1A6YB VRFGRIPK-----  
A57057 VRFGRIPKREKQRMLIEMQSAMKTMMSQFS-----  
NRD2\_HUMAN VRFGRIPKREKQRMLIEMQSAMKTMMSQFS-----  
NP\_005117.2 VRFGRIPKREKQRMLIEMQSAMKTMMSQFS-----

AAC52144.1 VRFGRIPKREKQRMLIEMQSAMKTMNTQFS-----  
NRD2\_MOUSE VRFGRIPKREKQRMLIEMQSAMKTMNTQFS-----  
NP\_035714.2 VRFGRIPKREKQRMLIEMQSAMKTMNTQFS-----  
BAC35811.1 VRFGRIPKREKQRMLIEMQSAMKTMNTQFS-----  
NP\_990536.1 VRFGRIPKREKQRMLIEMQSAMKTMNSQFS-----  
AAA62508.1 VRFGRIPKREKQRMLIEMQSAMKTMNSTQFG-----  
NRD2\_RAT VRFGRIPKREKQRMLIEMQSAMKTMNSTQFG-----  
CAA55014.1 VRFGRIPKREKQRMLIEMQSAMKTMNSTQFG-----  
NP\_671743.1 VRFGRIPKREKQRMLIEMQSAMKTMNSTQFG-----  
AAK76395.1 VRFGRIPKREKQRMLLEMQTAMNNMMNNSQL-----  
AAK76396.1 VRFGRIPKREKQRMLLEMQNAMNNMMNNSHG-----  
AAQ91256.1 VRFGRIPKREKQRMLAEMQNAMNNMVNNQLQ-----  
1A6YA VRFGR-----  
AAG01345.1 -----  
AAL57047.1 VRFGRVPKREKARILAAMQQSSSSRAHEQAA-----  
AAL57048.1 VRFGRVPKREKARILAAMQQSSSSRAHEQAA-----  
E75\_CHOFU VRFGRVPKREKARILAAMQQSSSSRAHEQAA-----  
AAL57049.2 VRFGRVPKREKARILAAMQQSSSSRAHEQAA-----  
BAA89262.1 VRFGRVPKREKARILAAMQQSSSSRAHEQAA-----  
E75\_MANSE VRFGRVPKREKARILAAMQQSSTSRAHEQAA-----  
NP\_730321.1 VRFGRVPKREKARILAAMQQSTQNRGQQRAL-----  
NP\_730322.1 VRFGRVPKREKARILAAMQQSTQNRGQQRAL-----  
E75A\_DROME VRFGRVPKREKARILAAMQQSTQNRGQQRAL-----  
E75\_GALME VRFGRVPKREKARILAAMQSSTTRAHEQAAA-----  
AAC35424.1 -----  
E75\_METEN VRFGRVPKREKAKILAAMQ-SVNAKSQERAVL-----  
AAS79101.1 VRFGRV-----  
E75C\_DROME VRFGRVPKREKARIWRPCNRPRIAASSDPS-----  
AAB35575.1 -----  
CAE63462.1 VRFGRVPKREKARMFEEMQKTNVQSQKDQIA-----  
NP\_493284.1 VRFGRVPKREKARMFEEMQKTNVQSQRDQIA-----  
CAB61000.1 VRQMKFRNAMRDDKSPDSVVFVPEISTLERQEE-----  
I45066 VRQMKFRNAMRDDKSPDSVVFVPEISTLERQEE-----  
AAG15187.1 VRQMKFRNAMRDDKSPDSVVFVPEISTLERQEE-----  
NP\_509713.2 VRQMKFRNAMRDDKSPDSVVFVPEISTLERQEE-----  
CAE70540.1 VRQTKRKNKPTSDRTVSSTVNVEPDDHIIICAD-----  
A49070 VRYGRVPKRSRELNGAAASAAAAGAPASLNVD-----  
AAA19975.1 VRYGRVPKRSRELNGAAASAAAAGAPASLNVD-----  
AAF69494.1 VRYGRVPKRSRELNGAAASAAAAGAPASLNVD-----  
NP\_524195.2 VRYGRVPKRSRELNGAAASAAAAGAPASLNVD-----  
E78A\_DROME VRYGRVPKRSRELNGAAASAAAAGAPASLNVD-----  
CAA67384.1 VRYGRVPKRSRELNGAAASAAAAGAPASLNVD-----  
S43435 -----  
CAA51523.1 -----  
XP\_316596.1 VRYGRVPKKSREAGSCSEENMSICVNSTTPAA-----  
AAK54127.1 VRYGRTPRRKGDETDNENVPSWEETSKFTHYE-----  
AAK54129.1 VRYGRTPRRKGDETDNENVPSWEETSKFTHYE-----  
AAF06997.1 VRYGRTPRRKGDEVDNENVPSWEETSKLTHYE-----  
A45360 IRFGRMPEAEKRKLVAGLTANEGS-QYNPQVADL-----  
NP\_803184.1 IRFGRMPEAEKRKLVAGLTANEGS-QYNPQVADL-----  
NP\_006229.1 IRFGRMPEAEKRKLVAGLTANEGS-QYNPQVADL-----  
AAP36130.1 IRFGRMPEAEKRKLVAGLTANEGS-QYNPQVADL-----  
AAF73406.1 IRFGRMPEAEKRKLVAGLTANEGS-QHNPQVADL-----  
AAO34393.1 IRFGRMPEAEKRKLVAGLTANEGS-QHNPQVADL-----  
AAF81095.1 IRFGRMPEAEKRKLVAGLTANEGS-QHNPQVADL-----  
BAA92682.1 IRFGRMPEAEKRKLVAGLTAVEGH-QHSPQVADL-----  
BAC78903.1 IRFGRMPEAEKRKLVAGLT-----

NP\_990059.1 IRFGRMPEAEKRKLVAGLTASEIS-CQN PQVADL-----  
AAA19972.1 IRFGRMPDGEKRKLVAGLTASEGC-QHN PQ LADL-----  
NP\_035275.1 IRFGRMPEAEKRKLVAGLTASEGC-QHN PQ LADL-----  
AAC65985.1 IRFGRMPEAEKRKLVAGLTASEGC-QQN PQ LADL-----  
NP\_037273.1 IRFGRMPEAEKRKLVAGLTASEGC-QQN PQ LADL-----  
CAC29088.1 IRFGRMPEAEKRKLVAGLTASEGC-QQN PQ LADL-----  
AAL93239.1 IRFGRMPEAEKRKLVAGLTASEGC-QHN PQ LADL-----  
AAP37029.1 IRFGRMPEAEKRKLV-----  
AAA03332.1 IRFG-----  
AAK76392.1 IRYGRMPEAEKKLVAGLLAGENPQSSS--GTDLK-----  
CAC95232.1 IRYGRMPEAEKRKLVAGLLAGERAPT TNPNGSD-----  
AAC39168.2 -----  
CAD62448.1 IRYGRMPEAEKRKLVAGLLAEELT-VSKPGGSDL-----  
A49289 IRFGRMPRSEKAKLKAEILTCEHD-IEDSETADL-----  
AAH00052.1 IRFGRMPRSEKAKLKAEILTCEHD-IEDSETADL-----  
NP\_005027.2 IRFGRMPRSEKAKLKAEILTCEHD-IEDSETADL-----  
CAA68898.1 IRFGRMPRSEKAKLKAEILTCEHD-IEDSETADL-----  
AAF73405.1 IRFGRMPRSEKAKLKAEILTCEHD-LEDSETADL-----  
CAA40856.1 IRFGRMPRSEKAKLKAEILTCEHD-LKDSETADL-----  
NP\_035274.2 IRFGRMPRSEKAKLKAEILTCEHD-LKDSETADL-----  
CAD88282.1 IRFGRMPRSEKAKLKAEILTCEHD-LEDSETADL-----  
NP\_037328.1 IRFGRMPRSEKAKLKAEILTCEHD-LKDSETADL-----  
AAF22965.1 IRFGRMPRSEKAKLKAEILTCEHD-LEDAETADL-----  
AAF73404.1 IRFGRMPRSEKAKLKAEILTCEHD-LEDAETADL-----  
PPAR\_PHACI IRFGRMPRSEKAKLKAEILTCEHD-LEDSEVADL-----  
PPAR\_CANFA IRFGRMPRSEKAKLKAEILTCEQD-PEDAETADL-----  
CAA06917.1 IRFGRMPRSEKAKLKAEVLTCDRD-SEGAETADL-----  
PPAR\_CAVPO IRFGRMPRSEKAKLKAEVLTCDRD-SEGAETADL-----  
AAF80479.1 IRFGRMPRSEKAKLKAEILTGENY-VEDESEMADL-----  
AAH60004.1 IRFGRMPRSEKAKLKAEVLMCDQD-VKDTQMADL-----  
PPAR\_XENLA IRFGRMPRSEKAKLKAEVLMCDQD-VKDSQMADL-----  
CAD62447.1 IRFGRMPQAEKLLKKAESNMVEKE-AESPMLADH-----  
PPAS\_XENLA IRFGRMPSEKAKLVQAPVSDSAA--PDSPVSDL-----  
AAA19971.1 IRFGRMPQAEKEKLLAEISSDIDQ--LNPESADLR-----  
AAF80170.1 IRFGRMPQAEKEKLLAEISSDIDQ--LNPESADLR-----  
AAB87481.1 IRFGRMPQAEKEKLLAEISSDIDQ--LNPESADLR-----  
AAC52134.1 IRFGRMPQAEKEKLLAEISSDIDQ--LNPESADLR-----  
AAN15206.1 IRFGRMPQAEKEKLLAEISSDIDQ--LNPESADLR-----  
CAA62152.1 IRFGRMPQAEKEKLLAEISSDIDQ--LNPESADLR-----  
AAM88773.1 IRFGRMPQAEKEKLLAEISSDIDQ--LNPESADLR-----  
AAH21798.1 IRFGRMPQAEKEKLLAEISSDIDQ--LNPESADLR-----  
NP\_851367.1 IRFGRMPQAEKEKLLAEISSDIDQ--LNPESADLR-----  
PPAT\_PIG IRFGRMPQAEKEKLLAEISSDIDQ--LNPESADLR-----  
AAO66458.1 IRFGRMPQAEKEKLLAEISSDIDQ--LNPESADLR-----  
CAB61263.1 IRFGRMPQAEKEKLLAEISSDIDQ--LNPESADLR-----  
CAA73032.1 IRFGRMPQAEKEKLLAEISSDIDQ--LNPESADLR-----  
CAA73382.2 IRFGRMPQAEKEKLLAEISSDIDQ--LNPESADLR-----  
PPAT\_CRIGR IRFGRMPQAEKEKLLAEISSDIDQ--LNPESADLR-----  
PPAT\_MACMU IRFGRMPQAEKEKLLAEISSDIDQ--LNPESADLR-----  
BAA23354.1 IRFGRMPQAEKEKLLAEISSDIDQ--LNPESADLR-----  
BAA32540.1 IRFGRMPQAEKEKLLAEISSDIDQ--LNPESADLR-----  
JE0279 IRFGRMPQAEKEKLLAEISSDIDQ--LNPESADLR-----  
JE0280 IRFGRMPQAEKEKLLAEISSDIDQ--LNPESADLR-----  
NP\_005028.3 IRFGRMPQAEKEKLLAEISSDIDQ--LNPESADLR-----  
NP\_035276.1 IRFGRMPQAEKEKLLAEISSDIDQ--LNPESADLR-----  
NP\_037256.1 IRFGRMPQAEKEKLLAEISSDIDQ--LNPESADLR-----  
NP\_056953.2 IRFGRMPQAEKEKLLAEISSDIDQ--LNPESADLR-----

AAL05261.1 IRFGRMPQAEKEKLLAEISSDIDQ--LNPESADLR-----  
AAL05262.1 IRFGRMPQAEKEKLLAEISSDIDQ--LNPESADLR-----  
AAL05267.1 IRFGRMPQAEKEKLLAEISSDIDQ--LNPESADLR-----  
PPAT\_RABIT IRFGRMPQAEKEKLLAEISSDIDQ--LNPESADLR-----  
AAO19445.1 IRFGRMPQAEKEKLLAEISSDIDQ--LNPESADLR-----  
AAG60685.2 IRFGRMPQAEKEKLLAEISSDIDQ--LNPESADLR-----  
AAL87700.1 IRFGRMPQAEKEKLLAEISSDIDQ--LNPESADLR-----  
CAB61238.1 IRFGRMPQAEKEKLLAEISSDIDQ--LNPESADLR-----  
AAN75018.1 IRFGRMPQAEKEKLLAEISSDIDQ--LNPESADLR-----  
AAC39169.1 IRFGRMPGAEKEKLLAEISSDIDQ--LNPESADLR-----  
AAO13014.1 IRFGRMPGAEKEKLLAEISSDIDQ--LNPESADLR-----  
AAA62110.1 IRFGRDRQAEKEKLLAEISSDIDQ--LNPESADLR-----  
BAA18949.1 IRFGRIAQAEKEKLLAEISSDIDQ--LNPESADLR-----  
AAH60474.1 IRFGRMPQAEKEKLLAEISSDIDQ--LNPESADQR-----  
PPAT\_XENLA IRFGRMPQAEKEKLLAEISSDIDQ--LNPESADQR-----  
CAC34402.1 IRFGRMPQAEKEKLLAEISSDIDQ--LNPESADQR-----  
CAB51396.1 IRFGRMPQAEKEKLLAEFSSDMEH--MHPEAADLR-----  
CAB51618.2 IRFGRMPQAEKEKLLAEFSSDMEH--MHPEAADLR-----  
CAD62449.1 IRFGRMPQAEKEKLLAEFSSDMEH--MHPEAADLR-----  
CAC02968.1 IRFGRMPQVEREKLLQAEFMDVEP--RNPESADLR-----  
CAC02969.1 IRFGRMPQVEREKLLQAEFMDVEP--RNPESADLR-----  
CAC95230.1 IRFGRMPQVEREKLLQAEFMDVEP--RNPESADLR-----  
AAP79434.1 -----  
NP\_035435.1 VQEERQRGKDRNENEVESTSSA--NEDMPVEKIL-----  
NP\_036937.1 VQEERQRGKDRNENEVESTSSA--NEDMPVEKIL-----  
AAB36777.1 VQEERQRGKDRNENEVESTSSA--NEDMPVEKIL-----  
AAC95154.1 VQEERQRGKDRNENEVESTSSA--NEDMPVERIL-----  
NP\_002948.1 VQEERQRGKDRNENEVESTSSA--NEDMPVERIL-----  
AAH63827.1 VQEERQRGKDRNENEVESTSSA--NEDMPVERIL-----  
AAG02188.1 VQEERQRGKDRNENEVESTSSA--NEDMPVERIL-----  
C41977 VQEERQRGKERNENEVESSNSA--NEDMPVEKIL-----  
RXRA\_XENLA VQEERQRGKERNENEVESSNSA--NEDMPVEKIL-----  
NP\_571292.2 VQEERQGRERSDNEVDSSSSF--NEEMPVEKIL-----  
RXRA\_BRARE VQEERQGRERSDNEVDSSSSF--NEEMPVEKIL-----  
1DSZB VQEERQRG-----  
2120366D VQEERQRAKERSEAEFGG--CA--NEDMPVEKILEA-----  
NP\_571228.1 VQEERQRAKERSEAEFGG--CA--NEDMPVEKILEA-----  
1RXR VQEERQRG-----  
NP\_033133.1 VQEERQRSRERAESEAEACASS--HEDMPVERIL-----  
S26670 VQEERQRSRERAESEAEACASS--HEDMPVERIL-----  
AAB27245.1 VQEERQRSRERAESEAEACASS--HEDMPVERIL-----  
CAA11109.1 VQEERQRSRERAESEAEACASTG--HEDMPVERIL-----  
XP\_341152.1 VQEERQRSRERAESEAEACASTG--HEDMPVERIL-----  
NP\_008848.1 VQEERQRSRERAESEAEACATSG--HEDMPVERIL-----  
NP\_990625.1 VQEERQGSRERSENAEASTSGG--SEEMPVERIL-----  
RXRG\_XENLA VQEERQRSREKSDTEAESTSST--SEEMPVERIL-----  
CAD45002.1 VQEERQRNRER-EGELEFSVSV--NEEMPVEKILA-----  
NP\_571313.1 VQEERQKNKER-DGDYECSSSA--NEEMPVEKILE-----  
BAB83838.1 VQEERQRNKER-EGEVESTSAV--NEEMPVEKILE-----  
CAA60792.1 VQEERQRGKER-DGEAELSGAI--NEEMPVEKILE-----  
S47633 VQEERQGRER-DGEAELSGAI--NEEMPVEKILE-----  
1BY4 VQEER-----  
RXRB\_RAT VQEERQRGKDK-DGDGDGAGGA--PEEMPVDRILE-----  
XP\_342096.1 VQEERQRGKDK-DGDGDGAGGA--PEEMPVDRILE-----  
S26669 VQEERQRGKDK-DGDGDGAGGA--PEEMPVDRILE-----  
NP\_035436.1 VQEERQRGKDK-DGDGDGAGGA--PEEMPVDRILE-----  
CAE83933.1 VQEERQRGKDK-DGDGDGAGGA--PEEMPVDRILE-----

D41727 VQEERQRGKDK-DGDGDGAGGA--PEEMPVDRILE-----  
AAH19432.1 VQEERQRGKDK-DGDGDGAGGA--PEEMPVDRILE-----  
A41651 VQEERQRGKDK-DGDGDGAGGA--PEEMPVDRILE-----  
A34418 VQEERQRGKDK-DGDGDGAGGA--PEEMPVDRILE-----  
AAA40081.2 VQEERQRGKDK-DGDGDGAGGA--PEEMPVDRILE-----  
NP\_068811.1 VQEERQRGKDK-DGDGEGAGGA--PEEMPVDRILE-----  
S37781 VQEERQRGKDK-DGDGEGAGGA--PEEMPVDRILE-----  
AAL14642.1 VQEERQRGKDK-DGDGEGAGGA--PEEMPVDRILE-----  
AAA60293.1 VQEERQRGKDK-DGDGEGAGGA--PEEMPVDRILE-----  
AAH54649.1 VQDERQRSVQEERQRNKERDGE--VESSSAANEE-----  
NP\_571350.1 VQDERQRSVQEERQRNKERDGE--VESSSAANEE-----  
2NLLA -----  
1R0NA VQAAAA-----  
AAM18898.1 VQEERQRSKEGKDGEVSTTNP--NEDMPVEKIQ-----  
AAM46151.1 VQEERQRSKEGKDGEVSTT-----  
BAA82618.1 VQEERQKNKEKEDGE PANPN-----DDMPVDKILEAE-----  
CAA36827.1 VQEERQRGA-RNAAGRLSASGGGSSGPGSVGGS-----  
NP\_476781.1 VQEERQRGA-RNAAGRLSASGGGSSGPGSVGGS-----  
A35872 VQEERQRGA-RNAAGRLSASGGGSSGPGSVGGS-----  
1R00 VQEERQ-----  
AAG01569.1 VQEERQRGT-RAANARAAGAGGGGGGGGVS NV-----  
BAD12053.1 VQEERQRGT-RAANARAAGAGGGGGGGGVS NV-----  
AAC15589.1 VQEERQRAK-DRNDNEVESTSGGVGVSGGVGGP-----  
AAM54495.1 VQEERQRAA-RGTEDAHPSSSV-QVQELSIERLL-----  
USP\_MANSE VQEERQRAA-RGTEDAHPSSS---VQELSIERLLEI-----  
BAC53670.1 VQEERQRAA-RGTEDPLPSSS---VQELSIERLLEM-----  
USP\_BOMMO VQEERQRAA-RRTEDAHPSSS---VQELSIERLLEL-----  
AAM54497.1 VQEERQRAA-RGTEDAHPSSS---VQ-----  
USP\_CHOFU VQEERQRNA-RGAEDAHPSSSVQVSDEL SIERL-----  
AAB35576.1 -----  
AAC03056.1 VQEERQRGG-KSQKGDMSISSTQSLVNNGPGR-----  
AAC15588.1 VQEERQRTK-DRADSEVESTSGGAPPEMLERI-----  
CAB75361.1 VQEERQRTK-DRDTSEVESTSN-MQAEMPLDRII-----  
AAF00981.1 VQEERQRTK-ERDQNEVESTSS-LHTDMPVERIL-----  
AAQ55293.1 VQEERQRTK-ERDQNEVESTSS-LHTDMPVERIL-----  
AAF73057.1 VQEERQRTK-ERDQSEVESTSS-LHSDMPIERIL-----  
AAC32789.2 VQEERQRTKGDKGDGDTES SCG-AISDMPIASI-----  
AAL86461.1 VQEERQRVK-EKGDGEVESTSG-ANNDMPVEQIL-----  
AAG24886.1 VQEERQRSS-KFSIKSEEINSTSSVRDVTIERI-----  
AAG24887.1 VQEERQRSS-KFSIKSEEINSTSSVRDVTIERI-----  
AAF19033.1 VQEERQRSS-KFSIKSEEINSTSSVRDVTIERI-----  
XP\_320944.1 VQEERQRSS-KFSMKSEEINSTSSVRDVVDRF-----  
AAM08268.1 VQEERQSSRADITKMLTSGGGQ---RHITTSQMEA-----  
AAD33428.1 VQEERQQQQQLQSEVQRSPTPPE-QNCDLSVNSM-----  
AAD45325.1 VQEERQQQQQLQSEVQRSPTPPE-QNCDLSVNSM-----  
AAD16119.1 VQEERHRQPSSNPVPLISKPPK--SEKKGPGRRS-----  
AAL29199.1 VREDRAPGGRPRIKSLMGMKEN--ADTFVSELV-----  
AAL29194.1 VREDRTPGGRHRHRS LQDHRPKKPHRSARDEP-----  
AAA36763.1 VRTDSLKGR-RGRLPSKPKQP--PDAS PANLLTSL-----  
NR41\_CANFA VRTDSLKGR-RGRLPSKPKQP--PDAS PANLLTSL-----  
NP\_002126.2 VRTDSLKGR-RGRLPSKPKQP--PDAS PANLLTSL-----  
AAP36590.1 VRTDSLKGR-RGRLPSKPKQP--PDAS PANLLTSL-----  
NP\_034574.1 VRTDSLKGR-RGRLPSKPKQP--PDASPTNLLTSL-----  
NR41\_RAT VRTDSLKGR-RGRLPSKPKQP--PDASPTNLLTSL-----  
NP\_077364.1 VRTDSLKGR-RGRLPSKPKQP--PDASPTNLLTSL-----  
CAA42718.1 VRTDSLKGR-RGRLPSKPKQP--PDASPTNLLTSL-----  
1CIT VRTDSLKGR-RGRLPSK-----

AAH56025.1 VRTDNLKGR-RGRLPSKPKQI--AESSPVSLINSL-----  
NR42\_XENLA VRTDSLKGR-RGRLPSKPKQI--AESSPVDLINSL-----  
NP\_006177.1 VRTDSLKGR-RGRLPSKPKSP--QEPSPPSPPVSL-----  
NP\_775263.1 VRTDSLKGR-RGRLPSKPKSP--QEPSPPSPPVSL-----  
NP\_775264.1 VRTDSLKGR-RGRLPSKPKSP--QEPSPPSPPVSL-----  
NP\_775265.1 VRTDSLKGR-RGRLPSKPKSP--QEPSPPSPPVSL-----  
AAB33999.1 VRTDSLKGR-RGRLPSKPKSP--QEPSPPSPPVSL-----  
NP\_038641.1 VRTDSLKGR-RGRLPSKPKSP--QDPSPPSPPVSL-----  
NP\_062201.2 VRTDSLKGR-RGRLPSKPKSP--QDPSPPSPPVSL-----  
NR42\_RAT VRTDSLKGR-RGRLPSKPKSP--QDPSPPSPPVSL-----  
I84692 VRTDSLKGR-RGRLPSKPKSP--QDPSPPSPPVSL-----  
AAC53154.1 VRTDSLKGR-RGRLPSKPKSP--QDPSPPSPPVSL-----  
BAA75461.1 VRTDSLKGR-RGRLPSKPKSP--QDPSPPSPPVSL-----  
AAA42058.1 VRTDSLKGR-RGRLPSKPKSP--QDPSPPSPPVSL-----  
CAC27783.1 VRTDNLKGR-RGRLPSKPKSP--QEPSPPSPPVSL-----  
NP\_008912.2 VRTDSLKGR-RGRLPSKPKSPLQQEPSQPSPPS-----  
NP\_056558.1 VRTDSLKGR-RGRLPSKPKSPLQQEPSQPSPPS-----  
NP\_059048.1 VRTDSLKGR-RGRLPSKPKSPLQQEPSQPSPPS-----  
NP\_113816.1 VRTDSLKGR-RGRLPSKPKSPLQQEPSQPSPPS-----  
NP\_775291.1 VRTDSLKGR-RGRLPSKPKSPLQQEPSQPSPPS-----  
NP\_775292.1 VRTDSLKGR-RGRLPSKPKSPLQQEPSQPSPPS-----  
NR43\_HUMAN VRTDSLKGR-RGRLPSKPKSPLQQEPSQPSPPS-----  
S71930 VRTDSLKGR-RGRLPSKPKSPLQQEPSQPSPPS-----  
BAA11419.1 VRTDSLKGR-RGRLPSKPKSPLQQEPSQPSPPS-----  
CAA09763.1 VRTDSLKGR-RGRLPSKPKSPLQQEPSQPSPPS-----  
CAA09764.1 VRTDSLKGR-RGRLPSKPKSPLQQEPSQPSPPS-----  
AAF05623.1 VRTDSLKGR-RGRLPSKPKSPLQQEPSQPSPPS-----  
AAB36006.1 VRTDSLKGR-RGRLPSKPKSPLQQEPSQPSPPS-----  
AAB02581.1 VRTDSLKGR-RGRLPSKPKSPLQQEPSQPSPPS-----  
CAA05172.1 VRTDSLKGR-RGRLPSKPKSP---QESPPSPPIISLI-----  
NP\_788079.1 VRTDSLKGR-RGRLPSKPKSP---QESPPSPPIISLI-----  
CAA75690.1 VRTDSLKGR-RGRLPSKPKSP---QESPPSPPIISLI-----  
HR38\_DROME VRTDSLKGR-RGRLPSKPKSP---QESPPSPPIISLI-----  
NP\_477119.1 VRTDSLKGR-RGRLPSKPKSP---QESPPSPPIISLI-----  
AAC46926.1 VRTDSLKGR-RGRLPSKPKSP---QESPPSPPIISLI-----  
S58238 VRTDSLKGR-RGRLPSKPKSP---QESPPSPPIISLI-----  
HR38\_BOMMO VRTDSLKGR-RGRLPSKPKCP---QESPPSPPIISLI-----  
AAF23095.1 VRTDSLKGR-RGRLPSKPKSP---QESPPSPPVSMI-----  
XP\_317123.1 VRTDSLKGR-RGRLPSKPKSP---QESPPSPPVSMI-----  
G88408 VRHGSLSGR-RGRLSSKTKLA--RSEDQSPPLPL-----  
NP\_497731.1 VRHGSLSGR-RGRLSSKTKLA--RSEDQSPPLPL-----  
AAA96984.1 VRHGSLSGR-RGRLSSKTKLA--RSEDQSPPLPL-----  
AAG15119.1 VRHGSLSGR-RGRLSSKTKLA--RSEDQSPPLPL-----  
CAE64932.1 VRGGSLSGR-RGRLSSKTKLA--RSVDQSPPLPL-----  
AAC61752.1 VRYGSLSGR-RGRLPSKTKVQ--HSDDPPSPPPLPL-----  
AAC80008.1 VQDETLKKERKDYRKRLPSTPKGSP-AEVTSSK-----  
CAD57002.1 VQEERTPQGAKLQRASTP-TPLGFPNLNFIPPS-----  
7UP2\_DROME VQRGRVPPTQPGLAGMHGQYQIANG-DP-MGIAG-----  
NP\_731681.1 VQRGRVPPTQPGLAGMHGQYQIANG-DP-MGIAG-----  
NP\_524325.1 VQRGRVPPTQPGLAGMHGQYQIANG-DP-MGIAG-----  
AAG53940.1 VQRGRVPPSQPPGLPY-GQYSIPNG-DAVTGFNG-----  
XP\_312394.1 VQRGRVPPSQPPGIPY-GQYSIPNG-DTVTGFNG-----  
BAB55582.1 VQRGRVPPSQPPGLGLPGQFTLGNG-DPGAGLN-----  
BAB88907.1 ESEKRLQ-----  
AAA19853.1 VQRGRMPPTQ----PNPGQYALTNG-DPLNGHCYLSG-----  
AAH56574.1 VQRGRMPPTQ----PNPGQYALTNG-DPLNGHCYLSGY-----  
XP\_346612.1 VQRGRMPPTQ----PNPGQYALTNG-DPLNGHCYLSG-----

NP\_786998.1 VQRGRMPPTQ----PNPGQYALTNG-DPLNGHCYLSG-----  
AAD42224.1 VQRGRMPPTQ----PNPGQYALTNG-DPLNGHCYLSG-----  
NP\_571255.1 VQRGRMPPTQ----PNPGQYALTNG-DPLNGHCYLSG-----  
NP\_112392.1 VQRGRMPPTQ----PNPGQYALTNG-DPLNGHCYLSG-----  
NP\_005645.1 VQRGRMPPTQ----PNPGQYALTNG-DPLNGHCYLSG-----  
NP\_034281.1 VQRGRMPPTQ----PNPGQYALTNG-DPLNGHCYLSG-----  
CAA34277.1 VQRGRMPPTQ----PNPGQYALTNG-DPLNGHCYLSG-----  
AAA21479.1 VQRGRMPPTQ----PTHGQFALTNG-DPLNCHSYLSG-----  
NP\_989752.1 VQRGRMPPTQ----PTHGQFALTNG-DPLNCHSYLSG-----  
NP\_542956.1 VQRGRMPPTQ----PTHGQFALTNG-DPLNCHSYLSG-----  
NP\_066285.1 VQRGRMPPTQ----PTHGQFALTNG-DPLNCHSYLSG-----  
CAA54096.1 VQRGRMPPTQ----PTHGQFALTNG-DPLNCHSYLSG-----  
AAP82999.1 VQRGRMPPTQ----PSHGQFALTNG-DPLNCHSYLSG-----  
NP\_776827.1 VQRGRMPPTQ----PSHGQFALTNG-DPLNCHSYLSG-----  
AAB37686.1 VQRGRMPPTQ----PTHGQFALTNG-DPLNCHSYLSG-----  
AAH44975.1 VQRGRMPPTQ----PTHGQFALTNG-DPLNCHSYLSG-----  
NP\_571258.1 VQRGRMPPTQ----PHHGQFALTNG-DPLHCHSYLSG-----  
AAH56748.1 VQRGRMPPTQ----PNPSHYALTNG-DHLNGQCYLSG-----  
AAH65651.1 VQRGRMPPTQ----PNPSHYALTNG-DHLNGQCYLSGY-----  
AAO61416.1 VQRGRMPPTQ----PAGAQYALTNGVDPINGHSYL-----  
NP\_571261.1 VQRGRMSNSQ----SSPGQYLSNGS-DPYNGQPYLSG-----  
S20617 VQRGRMSHPQ----TSPGQYTLNNV-DPYNGHSYLTGF-----  
A46358 VQRGRMPPTQ----PGPGQYL--DG--RFEGHTFLSGYIS---  
AAL29200.1 VQRGRIPPTQVP--QPSPQHSALNGNDVSNHGSF-----  
AAH02669.2 VQRGRIPHSL-----PGAVAASSGSPPGSALA AVASG-----  
NP\_005225.2 VQRGRIPHSL-----PGAVAASSGSPPGSALA AVASG-----  
AAH63018.1 VQRGRIPHSL-----PGAVAASSGSPPGSALA AVASG-----  
S02709 VQRGRIPHSL-----PGAVAASSGSPPGSALA AVASG-----  
EAR2\_MOUSE VQRGRIPHAL-----PGPAACS---PPGATGVEPFTGPPV--  
NP\_034280.1 VQRGRIPHAL-----PGPAACS---PPGATGVEHFTGPPV--  
AAH08138.1 VQRGRIPHAL-----PGPAACS---PPGATGVEPFTGPPV--  
NP\_620813.1 VQPGPIPHAL-----PGPAACS---PPGAAGVEPFAGPPV--  
AAH56043.1 VQRGRIPPAH-----SSASPTS---APGAG--EYFNGQPVSE  
AAH65330.1 VQRGRIPPSH-----SSLSPSTTP-VGGNAGGGVSEFY----  
AAH65332.1 VQRGRIPPSH-----AGISPA SMV GAGGDVGGGPGMG-----  
NP\_492181.1 RRSNETQTAVS--AVQRGRLPVTMP-SLFPNMFL-----  
AAL29198.1 EHR-----  
A36738 VQCERKPIE----VSREKSNCAASTEKIYIRKDLR-----  
NP\_003288.1 VQCERKPIE----VSREKSNCAASTEKIYIRKDLR-----  
BAB60786.1 VQCERKPIE----VSREKSNCAASTEKIYIRKDLR-----  
TR2\_HUMAN VQCERKPIE----VSREKSNCAASTEKIYIRKDLR-----  
NP\_665723.1 VQCERKPIE----VSREKSNCAASTEKIYIRKDLR-----  
AAC53253.1 VQCERKPIE----VSREKSNCAASTEKIYIRKDLR-----  
NP\_035759.2 VQCERKPIE----VSREKSNCAASTEKIYIRKDLR-----  
AAC29502.1 VQCERKPIE----VSREKSNCAASTEKIYIRKNLR-----  
NP\_989455.1 VQCERKPIE----VSREKSNCAASTEKIYIRKDLR-----  
AAB81178.1 VQCERKPIE----VSREKSNCAASTEKIYIRKDLR-----  
AAB69281.1 VQCERKPIE----SPRERSNCAASTEKIYIRKDLR-----  
NP\_059019.1 VQSERKPDF----VQREKPSNCAASTEKIYIRKDLR-----  
TR4\_MOUSE VQSERKPDF----VQREKPSNCAASTEKIYIRKDLR-----  
I54075 VQSERKPDF----VQREKPSNCAASTEKIYIRKDLR-----  
I59309 VQSERKPDF----VQREKPSNCAASTEKIYIRKDLR-----  
NP\_003289.2 VQSERKPDF----VQREKPSNCAASTEKIYIRKDLR-----  
TR4\_HUMAN VQSERKPDF----VQREKPSNCAASTEKIYIRKDLR-----  
AAH51670.1 VQSKRKPDF----VQREKPSNCAASTEKIYIRKDLR-----  
AAM46150.1 VQCERKPLDP---TARERPPNCATSTEKIYIRKDL-----  
AAB19174.1 VQCERSPLK----TRDKTPGNCAASTDKIYIRKDIR-----

AAB19176.1 -----  
AAQ55494.1 VQAERRPVN-----NS SMLC NNDNNQ QNTTPEHLS PN-----  
AAQ55495.1 VQAERRPVN-----NS SMLC NNDNNQ QNTTPEHLS PN-----  
NH41\_CAEEL VQAERRPVN-----NS SMLC NNDNNQ QNTTPEHLS PN-----  
AAC43032.1 -----  
AAC46924.1 VQHERKPIV-----DRKEGIIAAAGSSSTS GGGNGSS-----  
NP\_730636.1 VQHERKPIV-----DRKEGIIAAAGSSSTS GGGNGSS-----  
HR78\_DROME VQHERKPIV-----DRKEGIIAAAGSSSTS GGGNGSS-----  
NP\_524203.2 VQHERKPIV-----DRKEGIIAAAGSSSTS GGGNGSSTY-----  
CAA06690.1 VQHERKPII-----DKKDYSN--NIGNNYSNSV NKIFI-----  
XP\_317069.1 VQHERKPII-----DKKDGQSGPNPNSKY NPHR-NKEY-----  
AAL83722.1 FQHERKPIV-----DKNKSEPRDGLADRQAAYS--KLLGL---  
AAL29196.1 VQCERKPL-----EASRDMENGSDMRSVRTSFHLVPI-----  
AAL29197.1 VQCERKPL-----EASRDMENGSDMRSVRTSFHLVPI-----  
AAL29201.1 VQCERKPIT-----QPTKETSNDVSGECQPRGASLSP-----  
AAH30600.1 IREDGMPGGRNKSIGPVQISEEEIERIMSGQE-----  
NP\_201592.1 IREDGMPGGRNKSIGPVQISEEEIERIMSGQE-----  
NP\_001480.2 IREDGMPGGRNKSIGPVQISEEEIERIMSGQE-----  
NP\_034394.1 IREDGMPGGRNKSIGPVQISEEEIERIMSGQE-----  
NR61\_HUMAN IREDGMPGGRNKSIGPVQISEEEIERIMSGQE-----  
XP\_342428.1 IREDGMPGGRNKSIGPVQISEEEIERIMSGQE-----  
NP\_201591.1 IREDGMPGGRNKSIGPVQISEEEIERIMSGQE-----  
AAB06335.1 IREDGMPGGRNKSIGPVQISEEEIERIMSGQE-----  
NP\_571331.1 IREDGMPGGRNKSIGPVQISDEEIERIMSGQE-----  
AAC60126.1 IREDGMPGGRNKSIGPVQISDEEVERIMSGQE-----  
CAE30390.1 IREDGMPGGRNKMIGPVHISLEEIERIMSGQE-----  
AAM95452.1 -----  
AAL50350.1 VREDRMPGGRNSGA-VYNLYKVVKYKHKHKKANKA-----  
AAM54498.1 VREDRMPGGRNSGA-VYNLYKVVKYKHKHKKANKA-----  
AAD38900.1 VREDRMPGGRNSGA-VYNLYKVVKYKKNKKANKT-----  
CAA22836.1 VREDRMPGGRNSGA-VYNLYKVVKYKHKHKTNQK-----  
NP\_569967.2 VREDRMPGGRNSGA-VYNLYKVVKYKHKHKTNQK-----  
NP\_996331.1 VREDRMPGGRNSGA-VYNLYKVVKYKHKHKTNQK-----  
XP\_318161.1 VREDRMPGGRNSGA-VYNLYKVVKYKHKHKS NLK-----  
CAA06670.1 VREDRMPGGRNSGA-VYNLYKVVKYKHKHKKPACK-----  
AAG15181.1 VREDRMPGGRNGNS-IYSNYKQRRSIRKTKDY-----  
NP\_510536.1 VREDRMPGGRNGNS-IYSNYKQRRSIRKTKDY-----  
AAG15183.1 VREDRMPGGRNGNS-IYSNYKQRRSIRKTKDY-----  
CAE63296.1 VREDRMPGGRNGNS-IYSNYKQRRSIRKTRDY-----  
NP\_491689.2 VRVNKETDKDKVPSVASPNFEMTSQ-----  
T34026 VRVNKETDKDKVPSVASPNFEMTSQ-----  
NHR2\_CAEEL VRVNKETDKDKVPSVASPNFEMTSQ-----  
AAK17971.1 VRVNKETDKDKVPSVASPNFEMTSQ-----  
AAK17972.1 VRVNKETDKDKVPSVASPNFEMTSQ-----  
CAE60452.1 VRITKDEPKKTEYTKWSEAQS NELK-----  
1HCP -----  
AAA58461.1 EEKEN--NRASKP-HSTPATLQWLEENYEIAEGVC-----  
AAD31032.1 VRKDR--GRVLR--DKRRTGTSDRDKASKGLEHRT-----  
AAL82743.1 VRKDR--GRVLR--DKRRTGTSDRDKASKGLEHRT-----  
ESR1\_SPAAU VRKDR--GRVLR--DKRRTGTSDRDKASKGLEHRT-----  
ESR1\_PAGMA MRKDR--GRVLR--DKQRTGTSDRDKASKGLEHRT-----  
AAG44622.2 VRKDR--GRVLR--DKRRAGTNDRDKASKDLEYRT-----  
AAO66473.1 VRKDR--GHVLR--DKRRSDLSDRDKASKDLEHRT-----  
BAB85622.1 VRKDR--SHVLR--DKRRAGTNDRDKASKDQDHKT-----  
AAG48341.1 ARKDR--GRVLR--DKRRTCTSDKDKGSKERDERT-----  
AAP72178.1 VRKDR--GRVLR--DKRRTGTSDKDNGSKDREQRT-----  
BAC76957.1 VRKER--GRVLR--DKRRTAISDREKAVKGLEPKT-----

ESR1\_ORYLA VRKDR--IRILRR-DKRRTGVGDGDKVVKGQEHKT-----  
AAR82891.1 MRKDR--GRVLR--EKRR--YDRDKPAKDLPHTKAP-----  
ESR1\_ORENI MRKDR--GRVLR--EKRR--CDRDKPAKDLPHTRAS-----  
ESR1\_OREAU MRKDR--GRVLR--EKHGP--AQR-QTSQNLPTHKASP-----  
ESR1\_SHEEP -----  
NP\_990514.1 IRKDRRGEMMKQ-KRQREEQDSRNGEASSTEL-----  
QRCHE IRKDRRGGRMMKQ-KRQREEQDSRNGEASSTEL-----  
ESR1\_POEGU IRKDRRGGRVMKQ-KRQREEQDSRNGEASSTEL-----  
AAN63674.1 IRKDRRGGRMMKQ-KRQREEQDSRNGEASSTEL-----  
BAB79436.1 IRKDRRGGRMLKQ-KRQREEQDARNGETATAEM-----  
BAD08348.1 IRKDRRGGRMLKQ-KRQREEQDARNGETATAEM-----  
1HCQ IRKDRRG-----  
AAD47137.1 IRKDRRGGRMLKH-KRQRDDGEGRGEVGSAGDM-----  
S64737 IRKDRRGGRMLKH-KRQRDDGEGRGEVGSAGDM-----  
AAD52984.1 IRKDRRGGRMLKH-KRQRDDGEGRGEVGSAGDM-----  
CAE45969.1 IRKDRRGGRMLKH-KRQRDDGEGRGEVGSAGDM-----  
NP\_000116.1 IRKDRRGGRMLKH-KRQRDDGEGRGEVGSAGDM-----  
ESR1\_HUMAN IRKDRRGGRMLKH-KRQRDDGEGRGEVGSAGDM-----  
CAC42096.1 IRKDRRGGRMLKH-KRQRDDGEGRNEVGSAGDM-----  
AAK52104.1 IRKDRRGGRMLKH-KRQRDDGEGRNEAVPSGDM-----  
AAS46251.1 IRKDRRGGRMLKH-KRQRDDGEGRNEAVPSGDM-----  
ESR1\_PIG IRKDRRGGRMLKH-KRQRDDGEGRNEAVPPGDM-----  
ESR1\_HORSE IRKDRRGGRMLKH-KRQRDDGEGRNEAGPSGDR-----  
CAA43411.1 IRKDRRGGRMLKH-KRQRDDLEGRNEMGTSGDM-----  
NP\_036821.1 IRKDRRGGRMLKH-KRQRDDLEGRNEMGTSGDM-----  
NP\_031982.1 IRKDRRGGRMLKH-KRQRDDLEGRNEMGASGDM-----  
ESR1\_MESAU IRKDRRGGRMLKH-KRQRDDLEGRNDMGPSPGDM-----  
AAR23923.1 IRKDRRGGRML-----  
BAB79437.1 IRKDRRGGRMLKH-KRQRDEL DGRNAVAVTEAR-----  
AAQ84782.1 IRKDRRGGRMLKH-KRQKEEQEQKNDVDPSEIR-----  
AAQ84784.1 IRKDRRGGRMLKH-KRQKEEQEQKNDVDPSEIR-----  
NP\_988866.1 IRKDRRGGRMLKH-KRQKEEQEQKNDVTPSEIR-----  
ESR1\_XENLA IRKDRRGGRMLKH-KRQKEEQEQKNDVDPSEIR-----  
AAQ84783.1 IRKDRRGGRMLKH-KQKKEEPEQKNDVNPSEIR-----  
AAK28730.1 IRKTGDAGE-----  
AAC69548.1 FRKER-GGRI IKH-NRRPSGLKERERGYSKAQSG-----  
ESR1 ICTPU FRKER-GGRI IKH-NRRPSGLKERERGYSKAQSG-----  
CAC37560.1 YRKER-GGRAMKH-SRRHGGLKERERGYNEAQSG-----  
BAB16893.1 IRKDR-GGRSVRR-ERRRS SNEDRDKSSSDQCSR-----  
NP\_694491.1 IRKDR-GGRSVRR-ERRRS SNEDRDKSSSDQCSR-----  
AAL12298.1 IRKER-GGRAIRR-DRRRSGNEDRVKSYSEQSNR-----  
CAB45140.1 LRKDR-GGRVLRKDKRYCGPAGDREKPYGDLEH-----  
ESR1\_ONCMY LRKDR-GGRVLRKDKRYCGPAGDREKPYGDLEH-----  
ESR1\_SALSA LRKDR-GGRVLRKDKRYCGPAGDREKPYGDLEH-----  
A37197 LRKDR-GGRVLRKDKRYCGPAGDREKPTVTWST-----  
AAK20929.1 VRKDRKGFGRGVKHKRKRPI PQKNGGEGGAGGGQ-----  
AAB97424.1 SRRERCGYRIVRRQRS SSEQVHCLSKAKRNGG-----  
JW0046 SRRERCGYRIVRRQRS SSEQVHCLSKAKRNGG-----  
CAA05631.1 SRRERCGYRIVRRQRS SSEQVHCLSKAKRNGG-----  
ESR2\_RAT SRRERCGYRIVRRQRS SSEQVHCLSKAKRNGG-----  
NP\_036886.1 SRRERCGYRIVRRQRS SSEQVHCLSKAKRNGG-----  
BAA25431.1 SRRERCGYRIVRRQRS SSEQVHCLSKAKRNGG-----  
ESR2\_MOUSE SRRERCGYRIVRRQRSASEQVHCLNKAKRTSG-----  
NP\_034287.2 SRRERCGYRIVRRQRSASEQVHCLNKAKRTSG-----  
BAC35719.1 SRRERCGYRIVRRQRSASEQVHCLNKAKRTSG-----  
AAL15175.1 SRRERCGYRIVRRQRSASEQVHCLNKAKRTSG-----  
CAA03949.1 SRRERCGYRIVRRQRSASEQVHCLNKAKRTSG-----

ESR2\_BOVIN NP\_776476.1 ESR2\_SHEEP CAC42097.1 AAC05751.1 S71400 AAC25603.1 AAC15234.1 AAD32580.1 NP\_001428.1 AAK71318.1 ESR2\_CALJA AAK71317.1 AAK15151.1 ESR2\_PIG ESR2\_COTJA NP\_990125.1 ESR2\_STUVU AAD47637.1 AAK77002.1 AAO39210.1 ESR2\_MICUN AAP72179.1 BAD02929.1 ESR2\_ANGJA CAC85356.1 CAC85366.1 ERB2\_CARAU CAC93848.1 NP\_777287.1 ESR2 ICTPU AAK16742.1 NP\_851297.1 AAN60793.1 CAC93849.1 ERB1\_CARAU BAB91218.1 ESR2\_ONCMY AAR92486.1 AAL82742.1 ESR2\_SPAAU AAO39211.1 ESR3\_MICUN BAB85623.1 ESR2\_ORENI BAB79705.1 AAK57823.1 AAB97426.1 AAB97427.1 AAO89568.1 AAA58462.1 AAQ95045.1 AAC05114.1 XP\_234426.2 CAE68258.1 NP\_500074.1 AAL68274.1

SRRERCGYRIVRRQRNSDEQLHCLSKTKRNGG-----  
SRRERCGYRIVRRQRNSDEQLHCLSKTKRNGG-----  
SRRERCGYRIVRRQRNSDEQLHCLSKTKRNGA-----  
SRRERCGYRVRRQKS SDEQLHCLSKAKKNGG-----  
SRRERCGYRLVRRQRSADQLHCAGKAKRSGG-----  
SRRERCGYRIVRKQRNSEGHLHCLSRACKNGD-----  
SRRERCGYRIVRKQRNSEGHLHCLSRACKNGD-----  
SRRERCGYRILRRHRNSED---CMGKTKKYNEAAT-----  
SRRERCGYRILRRHRNSED---CMGKTKKYNEAAT-----  
SRRERCGYRILRSHRGAEERVHCLGRARRYSE-----  
-FVELSLLDQVRLLESCWMEVLMVGLMWRSIDH-----  
-----  
VRRERCSYRGARHRRGGLQPRDPTGRGLVRMG-----  
VRRERCSYRGARHRRGGLQPRDPTGRGLVRVG-----  
VRRERCSYRGTRHRRGGLQPRDPTGRGLVRVG-----  
VRRERCTYRGARHRL-PQIRDLAGSGGGARAH-----  
VRRERCTYRGARHRRM-PHIRELAGTGGGARTQ-----  
VRRERCSYRGARHRRN-PQIRDSSGGALGVRGC-----  
VRRERCSYRGARHRRN-PQIRDSSGGALGVRRH-----  
VRRERCSYRGGRHRRN-PPIRDSSGGAIGVRGH-----  
VRRERCSYRGARHRRN-PQIRDSSGGVGLRGQ-----  
VRRERCSYRGARHRRN-PQIRDSSGGVGLRGQ-----  
ARRERCGYRASRTAP---MRDGSARPVGVGQSQ-----  
LRRDRSSYQQRGAQQKRLVRFSGRMRMTGPRS-----  
LRRDRSSYQQRGAQQKRLVRFSGRMRMTGPRS-----  
LRRDRSSYQQRGAQQKRLVRFSGRMRMTGPRS-----  
LRRDRSSYQQRGAQQKRLVRFSGRMRMTGPRS-----  
LRRDRSSYQQRGAQQNRLTRFSGRMRTSGPRS-----  
LRRDRGSYQQRGARQKRLARFSGRMRTCGPRS-----  
LRRDRGSYQQRGAQQKRLARFSGRMRTSGPRS-----  
MRRDRSSY--RGHQPRRVGRFFTRGTASGPKRVL-----  
MRKERGNF--RNPQMRRVTRLSSQGRTINGPAVGP-----  
MRKERGNF--RDPQMRRVTRLSSQGRTSGPSVLN-----  
IRKERGNC--RNPQMRRVTRLSTQGRTNRPVLT-----  
MRKERGNY--RSPQMRRMTRLTSQGRTDSSSVLT-----  
MRKDHGSY--RNPKTRRLTRLSSQGRASGPKALT-----  
IRKERGNY--RNSQARRLTRLSSQGKTAEPKGIT-----  
VRKERSSY--RSAPARRAGRLTSQGRMNGPKVSS-----  
TRDRCSYRLTRQNRLSSAQAHWSRGKRSGE-----  
VKELLLSTLSPEQLVLTLLLEAEPNVLVSRPSMPF-----  
VKELLLSTLSPEQLVLTLLLEAEPNVLVSRPSMPF-----  
-----  
-----  
QRKEKRNSGNTSSLKGKRCRADSSDSAVNSTN-----  
-----  
RESLKHSDSHLESPIPEAIPYAALGNIEY-----  
MNRIMQLSHLFAARDMSSVEYAYLKMISFTTQ-----  
MQRLQLSQLFASRELTAVEYAYLKMISFTAQ-----  
-----VVPENQCAMKRREKKAQKEKDKMTTSPSSQHG-----

NP\_724456.1 -----VVPENQCAMKRREKKAQKEKDKMTTSPSSQHG-----  
NP\_724459.1 -----VVPENQCAMKRREKKAQKEKDKMTTSPSSQHG-----  
NP\_724460.1 -----VVPENQCAMKRREKKAQKEKDKMTTSPSSQHG-----  
1R0NB -----VVPENQCAMKRREKKAQKEKDKMTTSPSSQH-----  
AAG02187.2 -----VVPENQCAMKRREKKAQKEKDKMTTSPSSQHG-----  
AAG46050.1 -----VVPENQCAMKRREKKAQKEKDKIQTSVCATEI-----  
ECR\_LUCCU -----VVPENQCAMKRREKKAQKEKDKIQTSVCATEI-----  
CAA11907.1 -----VVPENQCAMKRREKKAQKEKEKQTTGNSPIIC-----  
AAQ23183.1 -----VVPENQCAIKRREKKAQKEKDKVQTNATVSTT-----  
ECR\_AEDAE -----VVPENQCAIKRREKKAQKEKDKVQTNATVSTT-----  
AAF19032.1 -----VVPENQCAIKRREKKAQKEKDKVQTNATVSTT-----  
ECR\_CHITE -----VVPENQCAIKRREKKAQKEKDKVPGIVGSNTS-----  
BAA07890.1 -----VIQE-PSKNKDRQRQKKDKGILLPVSTTTVEDH-----  
ECR\_BOMMO -----VIQE-PSKNKDRQRQKKDKGILLPVSTTTVEDH-----  
AAA87340.1 -----VIQE-PSKNKDRQRQKKDKGILLPVSTTTVEDH-----  
BAC44997.1 -----  
AAC36491.2 -----VVPETQCAMKRREKKAQKEKDKLPVSTTTVDD-----  
AAC61596.2 -----VVPETQCAMKRREKKAQKEKDKLPVSTTTVDD-----  
BAC11713.1 -----VVPETTCAIKRREKKAQREKDKLPVSTTTVDD-----  
BAC11714.1 -----VVPETTCAIKRREKKAQREKDKLPVSTTTVDD-----  
AAR84611.1 -----VVPETQCAIKRREKKAQREKDKLPVSTTTVDD-----  
AAM54494.1 -----VVPENQCAMKRREKKAQREKDKLPVSTTTVDD-----  
AAM54496.1 -----VVPENQCAMKRREKKAQREKDKLPVSTTTVDD-----  
ECR\_HELVI -----VVPENQCAMKRREKKAQREKDKLPVSTTTVDD-----  
ECR\_MANSE -----VVPETCKNKRREKEAQREKDKLPVSTTTVDD-----  
AAB27699.1 -----  
XP\_320323.1 -----VVPENHSSYKSELLPVLMKCESPPTAAIPVSL-----  
AAB94565.1 -----VVPYQCAIKRESKHHQK--DRPNSTTRESPSAL-----  
AAB94566.1 -----VVPYQCAIKRESKHHQK--DRPNSTTRESPSAL-----  
AAB94567.1 -----VVPYQCAIKRESKHHQK--DRPNSTTRESPSAL-----  
AAD19828.1 -----VVPYQCAVVRKEKKAQKDKDKPNSTTNGSPE-----  
CAA72296.1 -----VVPYQCAVVRKEKKAQKEKDKPNSTTNGSPD-----  
AAC33432.2 -----VVPESQCQVKREQKKARD-KDKTYP SLG-SPIAE-----  
AAH61668.1 -----LLTEVQCKSKRLRKNCKQNN SILSNVKVEDDG-----  
AAM33366.1 -----LLTEVQCKSKRLRKNCKQNN SILSNVKVEDDG-----  
AAM33367.1 -----LLTEVQCKSKRLRKNCKQNN SILSNVKTEDDG-----  
NP\_941060.1 -----LLTEIQCKSKRLRKNFKHGPALYP AIQVEDEG-----  
NP\_963913.1 -----LLTEIQCKSKRLRKNFKHGPALYP AIQVEDEG-----  
NP\_963914.1 -----LLTEIQCKSKRLRKNFKHGPALYP AIQVEDEG-----  
NP\_963915.1 -----LLTEIQCKSKRLRKNFKHGPALYP AIQVEDEG-----  
XP\_227528.2 -----LLTEIQCKSKRLRKSFKHRPTLSSAIQVEDEG-----  
AAL57619.1 -----LLTEIQCKSKRLRKNVKQLPDQTVNED-NEGHD-----  
NP\_989444.1 -----LLTEIQCKSKRLRKNVKQLPDQTVNED-NEGHD-----  
AAM53546.1 -----LLTEIQCKSKRLRKNVKQHADQTVNED-REGRD-----  
AAM53548.1 -----LLTEIQCKSKRLRKNVKQHADQTVNED-REGRD-----  
AAM53550.1 -----LLTEIQCKSKRLRKNVKQHADQTVNED-SEGRD-----  
CAE11874.1 -----LLTEIQCKSKRLRKNVKQHADQTVNED-SEGRD-----  
NP\_005114.1 -----LLTEIQCKSKRLRKNVKQHADQTVNED-SEGRD-----  
NP\_068513.1 -----LLTEIQCKSKRLRKNVKQHADQTVNED-SEGRD-----  
AAM53547.1 MYTGLLLEIQCKSKRLRKNVKQHADQTVNED-R-----  
AAM53549.1 MYTGLLLEIQCKSKRLRKNVKQHADQTVNED-R-----  
AAM53551.1 MYTGLLLEIQCKSKRLRKNVKQHADQTVNED-S-----  
NRH4\_HUMAN MYTGLLLEIQCKSKRLRKNVKQHADQTVNED-S-----  
I49019 MYTGLLLEIQCKSKRLRKNVKQHADQTVNED-D-----  
NRH4\_MOUSE MYTGLLLEIQCKSKRLRKNVKQHADQTVNED-D-----  
I49020 MYTGLLLEIQCKSKRLRKNVKQHADQTVNED-D-----  
NP\_033134.1 -----LLTEIQCKSKRLRKNVKQHADQTVNEDDSEGR-----

AAM18081.2 -----LLTEIQCKSKRLRKNVKQHTDQTTNDD-SEGPD-----  
AAA58594.1 -----VLSEEQIRKKKIRKQQQQESQSQSQSPVGP-----  
NP\_009052.1 -----VLSEEQIRKKKIRKQQQQESQSQSQSPVGP-----  
BAC36906.1 -----VLSEEQIRKKRIKQKQQQQPPPPSEPAASS-----  
NP\_033499.1 -----VLSEEQIRKKRIKQKQQQQPPPPSEPAASS-----  
NP\_113814.1 -----VLSEEQIRKKKIQKQQQQPPPPTEPASGS-----  
NRH2\_RAT -----VLSEEQIRKKKIQKQQQQPPPPTEPASGS-----  
AAD16050.1 -----VLSEEQIRLKKLKRQEEEAQAQATSVSPRVSSP-----  
NP\_038867.1 -----VLSEEQIRLKKLKRQEEEAQAQATSVSPRVSSP-----  
NP\_113815.1 -----VLSEEQIRLKKLKRQEEEAQAQATSVSPRVSSP-----  
AAO12508.1 -----VLSEEQIRLKKLKRQEEE-----  
AAH08819.1 -----VLSEEQIRLKKLKRQEEEAQAHATSLPPRASSP-----  
NRH3\_HUMAN -----VLSEEQIRLKKLKRQEEEAQAHATSLPPRASSP-----  
AAH41172.1 -----VLSEEQIRLKKLKRQEEEAQAHATSLPPRASSP-----  
NP\_005684.1 -----VLSEEQIRLKKLKRQEEEAQAHATSLPPRRSSP-----  
AAO19584.1 -----  
AAO19585.1 -----  
AAO19595.1 -----  
AAO19583.1 -----  
AAO19586.1 -----  
AAO19587.1 -----  
AAO19588.1 -----  
AAO19590.1 -----  
AAO19591.1 -----  
AAO19592.1 -----  
AAO19594.1 -----  
CAD45182.1 -----VLSEEQIRLKKLKKQEDDQARTVVVVRPNPPQP-----  
NP\_989873.1 -----VLSEEQIRLKKLKKQEDDQARTVVVVRPNPPQP-----  
AAO19593.1 -----  
1KB2 ILTDEEVQRKREMILKR-KEEEALKDSL RPKLS-----  
AAK48863.1 ILTDEEVQRKREMILKR-KEEEALKDSL RPKLS-----  
VDR\_BOVIN ILTDEEVQRKREMILKR-KEEEALKDSL RPKLS-----  
NP\_000367.1 ILTDEEVQRKREMILKR-KEEEALKDSL RPKLS-----  
NP\_033530.2 ILTDEEVQRKREMIMKR-KEEEALKDSL RPKLS-----  
VDR\_MOUSE ILTDEEVQRKREMIMKR-KEEEALKDSL RPKLS-----  
NP\_058754.1 ILTDEEVQRKREMIMKR-KEEEALKDSL RPKLS-----  
NP\_990429.1 ILTDEEVQRKREMILKR-KEEEALKE SLKPKLS-----  
VDR\_COTJA ILTDEEVQRKREMILKR-KEEEALKE SLKPKLS-----  
VDR\_XENLA ILTDEEVQRKRQMINKR-KSEEALKE SMRPKIS-----  
A60912 -----  
JC7229 ILTDEEVQREKEMILKR-KEEEAAREAMR PRLN-----  
NP\_570994.1 ILTDEEVQRKKDLIMKR-KEEEAAREARK PRLS-----  
JC7230 ILTDEEVQRKKDLIQRR-KDEEAQREAEREARR-----  
AAA61274.1 -----  
AAP05810.1 IMTEEEVQRKKEIIMKR-KLEDSAREVHTPQLL-----  
CAB55489.1 IMSDEAVEERRALIKRK-KSERTGTQPLGVQG-----  
CAB55490.1 IMSDEAVEERRALIKRK-KSERTGTQPLGVQG-----  
CAB55492.1 IMSDEAVEERRALIKRK-KSERTGTQPLGVQG-----  
CAB55493.1 IMSDEAVEERRALIKRK-KSERTGTQPLGVQG-----  
NP\_003880.3 IMSDEAVEERRALIKRK-KSERTGTQPLGVQG-----  
NP\_148934.1 IMSDEAVEERRALIKRK-KSERTGTQPLGVQG-----  
NP\_071285.1 IMSDEAVEERRALIKRK-KSERTGTQPLGVQG-----  
AAM10633.1 IMSDAAVEERRALIKRK-KRERIGTQPPGVQG-----  
NP\_035066.1 IMSDAAVEQRRALIKRK-KREKIEAPPPGGQG-----  
NP\_443212.1 IMSDAAVEQRRALIKRK-KREKIEAPPPGGQG-----  
BAB27404.1 IMSDAAVEQRRALIKK-----  
AAD54426.1 IMSDVAVAQRRALIKRK-KRERMEAQPPGMQG-----

|             |                                            |
|-------------|--------------------------------------------|
| AAH41187.1  | IMSDAAVEQRRALIKRKHKLTKSPPTPPGASL-----      |
| S41497      | IMSDAAVEQRRALIKRKHKLTKLPPTPPGASL-----      |
| JC7510      | IMSDEAVEQRRALIKRQNLSPPTPPGASL-----         |
| AAC53350.1  | ILSAEALALRRARQAQRR-AEKASLQLNQOQKE-----     |
| NP_033933.1 | ILSAEALALRRARQAQRR-AEKASLQLNQOQKE-----     |
| BAC84956.1  | ILSAEALALRRARQAARR-AQKASLQLSQOQKE-----     |
| NP_075230.1 | ILSAEALALRRARQAARR-AQKASLQLSQOQKE-----     |
| AAM76230.1  | ILSAEALALRRAKQAQRR-AQOTPMQLSNEQEE-----     |
| NP_005113.1 | ILSAEALALRRAKQAQRR-AQOTPVQLSKEQEE-----     |
| BAD00038.1  | ILSAEALAQRRAKQAQRR-AQWAAVQLSKGQOE-----     |
| BAD00039.1  | ILSAEALVQRRAKQAQRR-AQWAPVQLSKGQOE-----     |
| NP_990033.1 | IMSEALGRRRALRLQRRLAQAQPGGLTAEQQ-----       |
| AAP31437.1  | LNDLKPKSSIVSGKFKRKKPDMKNNLKVEVDD-----      |
| NP_741445.1 | LNDLKPKSSIVSGKFKRKKPDMKNNLKVEVDD-----      |
| CAE61946.1  | LNDIKPKTS-GSGKFKRKKPETKSQLKLEVEDT-----     |
| NP_509782.1 | ILNEEQLRRRKNRSLNNTGTCNKRSQPGNQQS-----      |
| NP_509784.1 | ILNEEQLRRRKNRSLNNTGTCNKRSQPGNQQS-----      |
| T20733      | ILNEEQLRRRKNRSLNNTGTCNKRSQPGNQQS-----      |
| CAE60812.1  | ILNEEQLRRRKNRSLNNNSTSNKRAQPGHQMS-----      |
| CAE63355.1  | IMS-EEARLEKKQORVEENR-----                  |
| NH48_CAEEL  | IMS-EEARLEKKQORVEENR-----                  |
| NP_741940.1 | IMS-EEARLEKKQORVEENRERRLQDAMNRALEE-----    |
| NP_524493.1 | IMS-EEDKLIKRRKIETNRAKRRLMENGTDACD-----     |
| XP_313130.1 | IMS-EEDKVLKRKKIEQNRAKKRQSNGSASEGS-----     |
| AAP21572.1  | SRYGRRSNWFKIHCLLQEHEQAAAAAAGKAP-----       |
| KNIR_DROVI  | SRYGRRSNWFKIHCLLQEHEQAAAAAAGKAP-----       |
| AAP12718.1  | SRYGRRSNWFKIHCLLQEHEQAAAAAAGKAP-----       |
| NP_524187.1 | SRYGRRSNWFKIHCLLQEHEQAAAAAG-KAPP-----      |
| S01919      | SRYGRRSNWFKIHCLLQEHEQAAAAAG-KAPP-----      |
| CAF21851.1  | SRYGRRSNWFKIHCLLQEQQQAGANMAAAAN-----       |
| NP_788552.1 | SRYGRRSNWFKIHCLLQEQQQAVAAMAAAH-----        |
| EGON_DROME  | SRYGRRSNWFKIHCLLQEQQTTSGLGGSV-----         |
| NP_524206.1 | SRYGRRSNWFKIHCLLQEQQTTSGLGGSV-----         |
| AAG15123.1  | VQRHRELFAS--QETSSESSSNPRIS-PTLSWPMD-----   |
| NP_510659.1 | VQRHRELFAS--QETSSESSSNPRIS-PTLSWPMD-----   |
| T19202      | VQRHRELFAS--QETSSESSSNPRIS-PTLSWPMD-----   |
| CAE69977.1  | VQRHRELFGR--QDSSD--GSNPRVS-PSTSWPMDVS----- |
| AAG15170.1  | VQKYRDAYGK--RGS DVESPGSSSVSLPNQGDGF-----   |
| NP_507636.1 | VQKYRDAYGK--RGS DVESPGSSSVSLPNQGDGF-----   |
| AAG15171.1  | VQKYRDAYGK--RGS DVESPGSSSVSLPNQGDGF-----   |
| AAG15172.1  | VQKYRDAYGK--RGS DVESPGSSSVSLPNQGDGF-----   |
| CAE73281.1  | VQKFRDSYGK--RGS DVECASTSNPMGF GFGYAP-----  |
| AAG15175.1  | VQQRRTIGK--REIKPDST--DLMQLLGSVGDGYP-----   |
| AAG15176.1  | VQQRRTIGK--REIKPDST--DLMQLLGSVGDGYP-----   |
| AAG15177.1  | VQQRRTIGK--REIKPDST--DLMQLLGSVGDGYP-----   |
| NP_503561.2 | VQQRRTIGK--REIKPDST--DLMQLLGSVGDGYP-----   |
| CAE66792.1  | VQQRDVIGK--REMKPDSTNMDLYQALSSIGES-----     |
| G88124      | VQQR-PPSKTLVEVSMDL---PTVSNPSILSFPSP-----   |
| NP_494785.1 | VQQR-PPSKTLVEVSMDL---PTVSNPSILSFPSP-----   |
| NP_494784.1 | VQQKP-RLPKNRKEVSIDLSSPRTSNLMLLEL-----      |
| F88124      | VRQKPGSFRKSKELISPSSSNHDEF SRMPILS-----     |
| CAE60139.1  | VQLKKE SPKSPIPDLTPSIP-TSSSNPTRRSL-----     |
| NP_505589.1 | VQNRRENDTP-KADLQFDTSKTEIRRPIPNFNI-----     |
| AAG15147.1  | VQQKRDQLGR-RDGLPTNREEPVLDTMRRAYEK-----     |
| AAG15148.1  | VQQKRDQLGR-RDGLPTNREEPVLDTMRRAYEK-----     |
| NP_741644.1 | VQQKRDQLGR-RDGLPTNREEPVLDTMRRAYEK-----     |
| CAE61044.1  | RRVISIRICK-KWDLAVQQKRDQLGKRDLRSV-----      |

CAE64011.1 VQPKREICKTKENGQLN-KSESSTSMEVSSHTS-----  
NP\_505588.1 VQPRRDKPQKEEKLILPSMNVSPADIEVSCIE-----  
AAG15132.1 VLSRLAKKNQNYKKSIVGSPDAYEPSTSTSDS-----  
NP\_504771.1 VLSRLAKKNQNYKKSIVGSPDAYEPSTSTSDS-----  
CAE71986.1 VLSRLAQKNQHYKKS-VGSSDECEPSTSKSGSI-----  
CAE58238.1 VMSRVV-PKSEAETNPWIENSLLEQIKVAYG-----  
NP\_503460.1 VLSRLA-VKSEPEF-----ESLLDQIKLAYERLQMA-----  
CAE65524.1 VLSRLATVKTEPGE-----GTSSGSGWAMGNLLEQ-----  
CAE64776.1 VKYNYDSAVHY-KEPSPKMKAEYLDHPTDPSP-----  
NP\_505639.1 VKYNYDAAVHYNKKPSPKMKIDAHEPPSD-----  
AAO39179.1 LIGAKGAIP-KLKVPKSFQTVGRPYFVLQCDP-----  
NP\_507680.1 LIGAKGAIP-KLKVPKSFQTVGRPYFVLQCDP-----  
CAE17952.1 LIGAKGAIP-KLKVPKSFQTVGRPYFVLQCDP-----  
CAE56100.1 SDRSKSGLT-EKVIYRSMEQFVGRPHFVLSCN-----  
NP\_503608.2 FQTDRDLIS-CSAISQSLATFLGRPEFILCCEP-----  
T43356 FQTDRDLIS-CSAISQSLATFLGRPEFILCCEP-----  
T31792 NRSRPYFVF-CYFSVFGHISRSTRVHFVLRARQS-----  
CAE74995.1 FQFDRDAYK-VREMVQ-LDRRIPMTLDTFTGNS-----  
NP\_503455.1 IQYDRDAYKSSVKKIKDSAENITEPKRDAT-----  
CAE74767.1 VKAKRTSSSSQNSQSLHKTMPSSVQLIDE-----  
NP\_501728.1 VKAKRTSSSQNVTSLYRNMNQSSILLIDQ-----  
NP\_510119.1 AVDDPTNIINKLLVMDTKRRDIFLNCTIPE-----  
CAE67969.1 VQKFRDVGKREAKSVESTTKPQFPILYELLK-----  
A42128 VRADMRGGRNKFVPMYKRDRAKQ-QKKAQIR-----  
AAB28339.1 VRADMRGGRNKFVPMYKRDRAKQ-QKKAQIR-----  
NP\_620639.1 VRADMRGGRNKFVPMYKRDRAKQ-QKKAQIR-----  
NP\_776828.1 VRADMRGGRNKFVPMYKRDRAKQ-QKKAQIR-----  
AAG24622.1 VRADMRGGRNKFVPMYKRDRAKQ-QKKAQIR-----  
STF1\_MOUSE VRADMRGGRNKFVPMYKRDRAKQ-QKKAQIR-----  
NP\_004950.2 VRADMRGGRNKFVPMYKRDRAKQ-QKKAQIR-----  
NP\_445796.1 VRADMRGGRNKFVPMYKRDRAKQ-QKKAQIR-----  
BAA19127.1 VRADMRGGRNKFVPMYKRDRAKQ-QKKAQIR-----  
AAG35648.1 VRADMRGGRNKFVPMYKRDRAKQ-QKKAQIR-----  
STF1\_PIG VRADGMRGGRNKFVPMYKRDRAKQ-QKKAQIR-----  
JC4972 VRADMRGGRNKFVPMYKRDRAKQ-QKKAQIR-----  
AAD01975.1 VRADMRGGRNKFVPMYKRDRAKQ-QKKALIR-----  
AAK94918.1 VRADMRGGRNKFVPMYKRDRAKQ-QKKALIR-----  
BAA76713.1 VRADMRGGRNKFVPMYKRDRAKQ-QKKALIR-----  
NP\_990408.1 VRADMRGGRNKFVPMYKRDRAKQ-QKKALIR-----  
AAK97659.1 VRADMRGGRNKFVPMYKRDRAKQ-QKKALIR-----  
AAM89250.1 VRADMRGGRNKFVPMYKRDRAKQ-QKKALIR-----  
AAO59489.1 VRADMRGGRNKFVPMYKRDRAKQ-QKKALIR-----  
BAA25269.1 VRADMRGGRNKFVPMYKRDRAKQ-QKKALIR-----  
BAA32394.1 VRADMRGGRNKFVPMYKRDRAKQ-QKKALIR-----  
BAC75890.1 VRADMRGGRNKFVPMYKRDRAKQ-QKKALIR-----  
AAS47030.1 VRADMRGGRNKFVPMYKRDRAKQ-QKKALIR-----  
BAA36789.1 VRADMRGGRNKFVPMYKRDRAKQ-QKKALIR-----  
AAG49004.1 VRADMRGGRNKFVPMYKRDRAKQ-QKRALIR-----  
AAG49005.1 VRADMRGGRNKFVPMYKRDRAKQ-QKRALIR-----  
NP\_571869.1 VRADMRGGRNKFVPMYKRDRAKQ-QKRALIR-----  
A56543 VRADMRGGRNKFVPMYKRDRAIKQ-QKKALIR-----  
AAA64285.1 VRADMRGGRNKFVPMYKRDRAIKQ-QKKALIR-----  
AAA18357.1 VRADMRGGRNKFVPMYKRDRAKQ-QKKALIR-----  
AAO21918.1 VRADMRGGRNKFVPMYKRDRAKQ-QKKALIR-----  
AAK54449.1 VRADMRGGRNKFVPMYKRDRAKQ-QKKALIR-----  
NP\_571538.1 VRADMRGGRNKFVPMYKRDRAKQ-QKKALIR-----  
AAD03155.1 VRADMRGGRNKFVPMYKRDRAKQ-QKKALIR-----

AAD03248.1 VRADRMGGGRNKFPGMPYKRDRALKQ-QKKALIR-----  
AAG35649.1 VRADRMGGGRNKFPGMPYKRDRALKQ-QKKALIR-----  
BAA34092.1 VRADRMGGGRNKFPGMPYKRDRALKQ-QKKALIR-----  
NP\_990409.1 VRADRMGGGRNKFPGMPYKRDRALKQ-QKKALIR-----  
NP\_995582.1 VRADRMGGGRNKFPGMPYKRDRALKQ-QKKALIR-----  
NP\_003813.1 VRADRMGGGRNKFPGMPYKRDRALKQ-QKKALIR-----  
BAA94077.1 VRADRMGGGRNKFPGMPYKRDRALKQ-QKKALIR-----  
BAA94078.1 VRADRMGGGRNKFPGMPYKRDRALKQ-QKKALIR-----  
AAC52645.1 VRADRMGGGRNKFPGMPYKRDRALKQ-QKKALIR-----  
BAA36340.1 VRADRMGGGRNKFPGMPYKRDRALKQ-QKKALIR-----  
NP\_109601.1 VRADRMGGGRNKFPGMPYKRDRALKQ-QKKALIR-----  
NP\_068510.1 VRADRMGGGRNKFPGMPYKRDRALKQ-QKKALIR-----  
AAQ72771.1 VRADRMGGGRNKFPGPIYKCDRALKL-QRKALIQ-----  
T01791 -----  
BAB18653.1 -----  
NP\_524143.2 VRADRMGGGRNKFPGMPYKRDRARKL-QVMRQRQ-----  
NP\_730359.1 VRADRMGGGRNKFPGMPYKRDRARKL-QVMRQRQ-----  
T13733 VRADRMGGGRNKFPGMPYKRDRARKL-QVMRQRQ-----  
AAA28915.1 VRADRMGGGRNKFPGMPYKRDRARKL-QVMRQRQ-----  
AAF82307.1 VRADRMGGGRNKFPGMPYKRDRARKL-QIMRQRQ-----  
XP\_315680.1 VRADRMGGGRNKFPGMPYKRDRARKL-QIMRQRQ-----  
AAL50351.1 VRADRMGGGRNKFPGMPYKRDRARKL-QMMRQRQ-----  
FTF1\_BOMMO VRADRMGGGRNKFPGMPYKRDRARKL-QMMRQRQ-----  
BAA01745.1 VRADRMGGGRNKFPGMPYKRDRARKL-QMMRQRQ-----  
AAD41899.1 VRADRMGGGRNKFPGMPYKRDRARKL-QLLRQRQ-----  
XP\_315681.1 -----  
AAF67038.1 VRADRMGGGRNKFSGFYKKDRAHRM-QRNAMEV-----  
AAF67040.1 VRADRMGGGRNKFSGFYKKDRAHRM-QRNAMEV-----  
NH25\_CAEEL VRADRMGGGRNKFSGFYKKDRAHRM-QRNAMEV-----  
CAE70358.1 VRADRMGGGRNKFSGFYKDRAHRL-QRNAMEV-----  
AAK19303.1 VRADRMGGGRNKFGLYRRDRQLKQ-QRGTYHQ-----  
FTFB\_DROME IREDTRGGRSTYQCSYTL PNSMLS-PLLSPDQ-----  
NP\_476932.1 IREDTRGGRSTYQCSYTL PNSMLS-PLLSPDQ-----  
NP\_476933.1 IREDTRGGRSTYQCSYTL PNSMLS-PLLSPDQ-----  
AAA28543.1 IREDTRGGRSTYQCSYTL PNSMLS-PLLSPDQ-----  
S33708 IREDTRGGRSTYQCSYTL PNSMLS-PLLSPDQ-----  
S33709 IREDTRGGRSTYQCSYTL PNSMLS-PLLSPDQ-----  
XP\_310077.1 IREDTRGGRSTYQCSYTL PGPMGG-AGGAGMQ-----  
BAA34123.1 IREDTRGGRSTYQCSYPLSGAASTGSLLSAH-----  
AAG49449.1 IRSDTRGGRSMYPGSRYLRLQIAAR---VSGN-----  
AAG29619.1 VRLDRVGGGRQKYKRRLDSESSPYL-SLQISPP-----  
NP\_004443.2 VRLDRVGGGRQKYKRRLDSESSPYL-SLQISPP-----  
ERR2\_RAT VRLDRVGGGRQKYKRRLDSENSPYL-SLQISPP-----  
AAH44858.1 VRLDRVGGGRQKYKRRLDSENSPYL-NLPISPP-----  
NP\_036064.2 VRLDRVGGGRQKYKRRLDSENSPYL-NLPISPP-----  
BAC27656.1 VRLDRVGGGRQKYKRRLDSENSPYL-NLPISPP-----  
ERR2\_MOUSE VRLDRVGGGRQKYKRRLDSENSPYL-NLPISPP-----  
1L01 VRLDRVGGGRQKYKRRLDSENS-----  
AAS66635.1 VRLDRVGGGRQKYKRMDAENTAYL-GLTLPPP-----  
AAH08218.1 VRLDRVGGGRQKYKRRI DAENSPYL-NPQLVQP-----  
NP\_976081.1 VRLDRVGGGRQKYKRRI DAENSPYL-NPQLVQP-----  
AAH64700.1 VRLDRVGGGRQKYKRRI DAENSPYL-NPQLVQP-----  
NP\_036065.1 VRLDRVGGGRQKYKRRI DAENSPYL-NPQLVQP-----  
BAA74855.2 VRLDRVGGGRQKYKRRI DAENSPYL-NPQLVQP-----  
AAQ93376.1 VRLDRVGGGRQKYKRRI DAENSPYL-NPQLVQP-----  
BAC41450.1 VRLDRVGGGRQKYKRRI DAENSPYL-NPQLVQP-----  
AAS66636.1 VRLDRVGGGRQKYKRRI DAENSPYL-NPQLALP-----

AAB17015.1 VRLDRVRGGRQKYKRRPEVDPLPFP-GPFPAGP-----  
AAH63795.1 VRLDRVRGGRQKYKRRPEVDPLPFP-GPFPAGP-----  
ERR1\_HUMAN VRLDRVRGGRQKYKRRPEVDPLPFP-GPFPAGP-----  
ERR1\_MOUSE VRLDRVRGGRQKYKRRPEVDPLPFP-GPFPAGP-----  
A29345 VRLDRVRGGRQKYKRRPEVDPLPFP-GPFPAGP-----  
XP\_215174.2 VRLDRVRGGRQKYKRRPEVDPLPFP-GPFPAGP-----  
NP\_004442.3 VRLDRVRGGRQKYKRRPEVDPLPFP-GPFPAGP-----  
NP\_031979.1 VRLDRVRGGRQKYKRRPEVDPLPFP-GPFPAGP-----  
AAS20260.1 VRLDRVRGGRQKYKRRPEVDPLPFP-GSFPAGP-----  
AAS66634.1 VRLDRVRGGRQKYKRRPEVENATYQSAPIPLR-----  
AAS66637.1 VRMDRVRGGRQKYKRRVDSTLSVFS-KTAYTHA-----  
NP\_648183.3 VRLDRVRGGRQKYRRNPVSNYSYQTMQLLYQSN-----  
NP\_729340.1 VRLDRVRGGRQKYRRNPVSNYSYQTMQLLYQSN-----  
XP\_321343.1 VRLDRVRGGRQKYRRNPVSNYSYQTMQLLYQSN-----  
AAK01303.1 RKTXXX--IKGIQQATTGVSQETSENPAKNTIVP-----  
AAP48589.1 RKTXXX--IKGIQQATTGVSQETSENPAKNTIVP-----  
GCR\_SAGOE RKTXXX--IKGIQQATTGVSQETSENPAKNTIVP-----  
GCR\_SAIIBB RKTXXX--IKGIQQATTGVSQETSENPAKNTIVP-----  
GCR\_AOTNA RKTXXX--IKGIQQATTGVSQETSENPAKNTIVP-----  
GCR\_SAIISC RKTXXX--IKGIQQATTGVSQETSENPAKNTIVP-----  
1802363A RKTXXX--IKGIQQATTGVSQETSENPAKNTIVP-----  
AAC34207.1 RKTXXX--IKGIQQATTGVSQETSENPGNKTIVP-----  
QRHUGB RKTXXX--IKGIQQATTGVSQETSENPGNKTIVP-----  
NP\_000167.1 RKTXXX--IKGIQQATTGVSQETSENPGNKTIVP-----  
CAE45716.1 RKTXXX--IKGIQQATTGVSQETSENPGNKTIVP-----  
AAA16603.1 RKTXXX--IKGIQQATTGVSQETSENPGNKTIVP-----  
AAF66595.1 RKTXXX--IKGIQQATTGVSQETSENSANKTIVP-----  
GCR\_PIG RKTXXX--IKGIQQATTGVSQETSENSANKTIVP-----  
CAC10271.1 RKTXXX--IKGIQQATTGVSXETSENSANKTIVP-----  
GCR\_TUPGB RKTXXX--IKGIQQTTTGISQETPENSANKTIVP-----  
AAO85271.2 RKTXXX--IKGIQQTSTGVSQETSENPSNRTVVP-----  
GCR\_RABIT RKTXXX--IKGIQQTSTGVSQETSENPSNRTVVP-----  
1R4R RKTXXX--IKGIQQATAG-----  
A54273 RKTXXX--IKGIQQATTGVSQNTSENP-NKTIVPA-----  
GCR\_CAVPO RKTXXX--IKGIQQATTGVSQNTSENP-NKTIVPA-----  
AAB07866.1 RKTXXX--IKGIQQATAGVSQDTSENP-NKTIVPA-----  
NP\_036708.1 RKTXXX--IKGIQQATAGVSQDTSENP-NKTIVPA-----  
AAL66772.2 RKTXXX--IKGIQQATAGVSQDTSENP-NKTIVPA-----  
AAL78956.1 RKTXXX--IKGIQQATAGVSQDTSENP-NKTIVPA-----  
GCR\_RAT RKTXXX--IKGIQQATAGVSQDTSENP-NKTIVPA-----  
CAA72938.1 RKTXXX--IKGIQQATAGVSQDTSENP-NKTIVPA-----  
CAA31738.1 RKTXXX--IKGIQQATAGVSQDTSENA-NKTIVPA-----  
NP\_032199.1 RKTXXX--IKGIQQATAGVSQDTSENA-NKTIVPA-----  
CAA31739.1 RKTXXX--IKGIQQATAGVSQDTSENA-NKTIVP-----  
1R4O RKTXXX--IKGIQQATAG-----  
GCR\_XENLA RKTXXX--IKGIQQSTTATAARESPETSMTRTLVP-----  
S44047 RKTXXX--IKGIQQSTTATAARESPETSMTRTLVP-----  
CAA68545.1 RKTXXX-----  
1GLU RKTXX-----  
GCR\_ONCMY RKNKKL--IRLKGQTTMEPNPPPP-----  
AAS48459.1 RKNKKL--IKMKVQRPSGSSEP-ISBN-----  
GCR\_PAROL RKNKKL--IKMKVHRPTGSAEP-ISBN-----  
AAM27889.1 RKNKKL--IKMKVHR-AGASEPTISBN-----  
AAM27888.1 RKNKKL--IKMKVHR-AGASEPTISNMPVPPVPRS-----  
1RGD R-----  
1GDC R-----  
AAR87479.1 RKTXXLNRLKGVQQPTTAELTPRPLPE-----

AAM27887.1 RKLKK-NRLKGVQQSNPPEVTPSPVETRSLVP-----  
AAK20930.1 RKLKKQGRVKGENQRS PASSTATTSSATPQPS-----  
AAA75575.1 RKSKKLGKLGKGVHEEHPQQPLQQTPTAS-----  
MCR\_XENLA RKSKKLGKLGKGVHEEHPQQPLQQTPTAS-----  
AAB35738.1 RKSKKL-----  
AAC63513.1 RKSKKLGKLGKGIHEEQPQQQPPPPPPPPQSP-----  
NP\_000892.1 RKSKKLGKLGKGIHEEQPQQQPPPPPPPPQSP-----  
AAP48590.1 RKSKKLGKLGKGIHEEQPQQQPPPPPPPPQSP-----  
AAP48591.1 RKSKKLGKLGKGIHEEQPQQQPPPPPPPP-----  
MCR\_SAISC RRSKKLGKLGKGIHEEQPQQQ-PPPPPPPPQSPE-----  
NP\_037263.1 RKSKKLGKLGKGLHEEQPQQPPPPPPQSPEEGT-----  
XP\_356093.1 RKSKKLGKLGKGLHEEQPQQPPPPPPQSPEEGT-----  
MCR\_MOUSE RKSKKLGKLGKGLHEEQPQQPPPPPPQSPEEGTTY-----  
MCR\_TUPGB RKSKKLGKLGKGLHEEQPQQPPP--PQSPEEGTTY-----  
AAM27890.1 RKSKKL-KLKGVSEDLQGSKDGQTATGGAGGYL-----  
1LAT RKTKKK-----  
CAC67405.1 RRCISLPCMNYARGCTKSAFSSFDCCSPLKNT-----  
AAK20931.1 HRSKRMR-MKTSGGDDAARRDDGGAGSSTQALV-----  
AAA49009.1 -----  
AAA49010.1 -----  
AAA49012.1 RKFKKLNKMKVVRTL D-VALQQPAVLQDETQSL-----  
NP\_990593.1 RKFKKLNKMKVVRTL D-VALQQPAVLQDETQSL-----  
AAA49013.1 RKFKKLNKMKVVRTL D-VALQQPAVLQDETQSL-----  
AAA49014.1 RKFKKLNKMKVVRTL D-VALQQPAVLQDETQSL-----  
AAA60081.1 RKFKKFNKVRVVRALDAVALPQPVGVPNESQA-----  
BAC11013.1 RKFKKFNKVRVVRALDAVALPQPVGVPNESQA-----  
AAQ96833.1 RKFKKFNKVRVVRALDAVALPQPLGVPNESQA-----  
QRHUP RKFKKFNKVRVVRALDAVALPQPLGVPNESQA-----  
PRGR\_HUMAN RKFKKFNKVRVVRALDAVALPQPLGVPNESQA-----  
NP\_000917.2 RKFKKFNKVRVVRALDAVALPQPLGVPNESQA-----  
AAG09282.1 RKFKKFNKVRVMRTLDAVALPQPVGIPNESQA-----  
CAD89880.1 RKFKKFNKVRVMRTLDAVALPQPVGIPNESQA-----  
PRGR\_SHEEP RKFKKFNKVRVMRTLDAVALPQPVGIPNESQA-----  
PRGR\_RABIT RKFKKFNKVRVMRALDAVALPQPVGIPNESQR-----  
BAC29608.1 RKFKKFNKVRVMRTL DGVALPQSVGLPNESQA-----  
NP\_032855.1 RKFKKFNKVRVMRTL DGVALPQSVGLPNESQA-----  
BAC35662.1 RKFKKFNKVRVMRTL DGVALPQSVGLPNESQA-----  
NP\_074038.1 RKFKKFNKVRVMRAL DGVALPQSVAFPNESQT-----  
XP\_346819.1 RKFKKFNKVRVMRAL DGVALPQSVGLPNESQT-----  
AAK77950.1 RKFKKFSKVRVMRAL DGVAVPQSVGLPNESQP-----  
BAB91074.1 RNLHIDDQITLIQYSWMSLMVFGLGWSYKH-----  
BAC06585.1 RNLHIDDQITLIQYSWMSLMVFGLGWSYKH-----  
BAC11012.1 RNLHIDDQITLIQYSWMSLMVFGLGWSYKH-----  
AAA49039.1 -----  
AAG01366.1 RKFKKFGRIKTGREIDTVVLQSPPTLSLECQQ-----  
AAL55260.1 RKFKKFGRIKTGREIDTVVLQSPPTLSLECQQ-----  
AAG42362.1 RKFKKFGRIKTGREIDTVVLQSPPTLSLECQQ-----  
AAN63590.1 RKFKKYNRLKPGRELDRIATSSP---MECQQALTR-----  
BAA89539.1 RKLKKGALKAAGLTQALVAHSLTPRRLSGDS-----  
BAC11011.1 FTFS PGQDIQLI PPLINLLMSIEPDVIYAGHDNTK-----  
GCR\_SHEEP -----  
A34721 RKLKKGNLKQLQEEGEASSTTSPTTEETTQKLT-----  
ANDR\_PANTR RKLKKGNLKQLQEEGEASSTTSPTTEETTQKLT-----  
ANDR\_HUMAN RKLKKGNLKQLQEEGEASSTTSPTTEETTQKLT-----  
AAA51775.1 RKLKKGNLKQLQEEGEASSTTSPTTEETTQKLT-----  
AAA51780.1 RKLKKGNLKQLQEEGEASSTTSPTTEETTQKLT-----  
AAD45921.1 RKLKKGNLKQLQEEGEASSTTSPTTEETTQKLT-----

B34721 RKLKKLGNLKLQEEGEASSTTSPTTEETTQKLT-----  
NP\_000035.2 RKLKKLGNLKLQEEGEASSTTSPTTEETTQKLT-----  
AAA51735.1 RKLKKLGNLKLQEEGEASSTTSPTTEETTQKLT-----  
AAA51770.1 RKLKKLGNLKLQEEGEASSTTSPTTEETTQKLT-----  
AAA51771.1 RKLKKLGNLKLQEEGEASSTTSPTTEETTQKLT-----  
ANDR\_MACFA RKLKKLGNLKLQEEGEASSTTSPTTEETAQKLT-----  
ANDR\_PAPHA RKLKKLGNLKLQEEGEASSTTSPTTEETAQKLT-----  
AAS19691.1 RKLKKLGNLKLQEEGEASSTTSPTTEETAQKLT-----  
AAA51774.1 RKLKKLGNLKLQEEGEASSTTSPTTEETTQKLT-----  
AAM96904.1 RRLKKLGNLKLQEEGEASSTTSPTTEETTQKLT-----  
AAG37994.1 RKLKKLGNLKLQEEGEASSATSPTTEEPAQKLT-----  
AAG40566.1 RKLKKLGNLKLQEEGEASSATSPTTEEPAQKLT-----  
ANDR\_EULFC RKLKKLGNLKLQEEGEASSATSPTTEESSQKLT-----  
AAQ84563.1 RKLKKLGNLKLQEEGEASNVTSPTEEPTQKLT-----  
ANDR\_CANFA RKLKKLGNLKLQEEGEASNVTSPTEEPTQKLT-----  
AAK51126.1 RKLKKLGNLKLQEEGEASGATSPTTEEPTQKLT-----  
B40494 RKLKKLGNLKLQEEGENSSAGSPTEDPSQKMT-----  
NP\_036634.1 RKLKKLGNLKLQEEGENSSAGSPTEDPSQKMT-----  
AAA40734.1 RKLKKLGNLKLQEEGENSSAGSPTEDPSQKMT-----  
NP\_038504.1 RKLKKLGNLKLQEEGENSNAGSPTEDPSQKMT-----  
ANDR\_RABIT RKLKKLGNLKLQEEGESSASSPTEDTTQKLT-----  
AAB28340.1 -----  
AAC97386.1 RKLKKLGNLKAQEELDGSVQEGESKELSPGM-----  
AAP85538.1 RKLKKLGNLKAQEELEGSPGQSEGREMPPNMS-----  
AAO61694.1 RKLKKIGQQKNPDGDHPPQEPAEVMPNISPKT-----  
BAA33451.1 RKLKKIGQHKNSEDEHPLQEPAEVMPNISPKS-----  
AAG48340.1 RKLKKIGQQKNPEEDHFGQEQPDAMQNISPKS-----  
AAO83572.1 RKLKKIGQQKIPEEEPLKDPLEVIQNFSPKS-----  
AAO83573.1 RKLKKIGQQKIPEEEPLKDPLEVIQNFSPKS-----  
AAL92878.1 RKLKKIGQQKSPREEHGAQDPVD--PHVSPKSGV-----  
BAB20082.1 RKLKKIGQQKSPKEDHGAQDPVEVIPNVSPKT-----  
BAC98301.1 RKLKKIGQQKTSEDDLPVQEPAELEPHHTSPQS-----  
BAA32784.1 RKLKKIVQLKSPPEEDLPTQGPTDTIQGVSPQS-----  
BAA32785.1 RKLKKIGQLKSPPEEDLPTQGPTDAIQCVSPQS-----  
BAA83805.1 RKLKKIGQLKPPDE-LPTQAPTDAIQCISPKPG-----  
AAM09278.1 RKLKKIGQMKGPPEEVGPVQGPSETIQCLSPKP-----  
BAA75464.1 RKLKKIGQMRAPED-GQGQGPAAEELSVSPKYD-----  
JG0194 RKLKKIGQMRAPED-GQGQGPAAEELSVSPKYD-----  
AAD25074.1 RRLKGTGQASNGEEEQQPASWGHGEKEERAAC-----  
BAB20081.1 RRLKGAGQARNGEEEQQPASWGHGEKEERAAC-----
