# Supplementary material
Source: PubMed Central journal article supplement (PMC1183107)
Supplement: nar_33_14_4455__7.pdf [file nar_33_14_4455__7.pdf]

CLUSTAL W (1.83) multiple sequence alignment

```
FTF1_BOMMO      CPVCGDKVSGYHYGLLTCEESCKGFFKRTVQN-----KQVYT-CVAERACHIDKTQRK
NP_524143.2     CPVCGDKVSGYHYGLLTCEESCKGFFKRTVQN-----KQVYT-CVAERSCHIDKTQRK
NP_004950.2     CPVCGDKVSGYHYGLLTCEESCKGFFKRTVQN-----NKHYT-CTESQSCKIDKTQRK
STF1_MOUSE      CPVCGDKVSGYHYGLLTCEESCKGFFKRTVQN-----NKHYT-CTESQSCKIDKTQRK
NP_445796.1     CPVCGDKVSGYHYGLLTCEESCKGFFKRTVQN-----NKHYT-CTESQSCKIDKTQRK
NP_776828.1     CPVCGDKVSGYHYGLLTCEESCKGFFKRTVQN-----NKHYT-CTESQSCKIDKTQRK
STF1_PIG        CPVCGDKVSGYHYGLLTCEETCKGFFKRTVQN-----NKHYT-CTESQSCKIDKTQRK
AAA28543.1      CPICGDKISGFHYGIFSCESCKGFFKRTVQN-----RKNYV-CVRGGPCQVSI STRK
7UP2_DROME      CVVCGDKSSGKHYGQFTCEGCKSFFKRSVRR-----NLTYT-CRGSRNCPIDQHHRN
NP_524325.1     CVVCGDKSSGKHYGQFTCEGCKSFFKRSVRR-----NLTYT-CRGSRNCPIDQHHRN
NP_066285.1     CVVCGDKSSGKHYGQFTCEGCKSFFKRSVRR-----NLSYT-CRANRNCPIDQHHRN
NP_542956.1     CVVCGDKSSGKHYGQFTCEGCKSFFKRSVRR-----NLSYT-CRANRNCPIDQHHRN
NP_989752.1     CVVCGDKSSGKHYGQFTCEGCKSFFKRSVRR-----NLSYT-CRANRNCPIDQHHRN
CAA54096.1      CVVCGDKSSGKHYGQFTCEGCKSFFKRSVRR-----NLSYT-CRANRNCPIDQHHRN
NP_005645.1     CVVCGDKSSGKHYGQFTCEGCKSFFKRSVRR-----NLTYT-CRANRNCPIDQHHRN
NP_034281.1     CVVCGDKSSGKHYGQFTCEGCKSFFKRSVRR-----NLTYT-CRANRNCPIDQHHRN
NP_786998.1     CVVCGDKSSGKHYGQFTCEGCKSFFKRSVRR-----NLTYT-CRANRNCPIDQHHRN
CAA54248.1      CAICGDRATGKHYGASSCDGCKGFFRRSVRK-----NHMYT-CRFSRQCVVDKDKRN
NP_032287.1     CAICGDRATGKHYGASSCDGCKGFFRRSVRK-----NHMYT-CRFSRQCVVDKDKRN
NP_071516.1     CAICGDRATGKHYGASSCDGCKGFFRRSVRK-----NHMYT-CRFSRQCVVDKDKRN
HN4A_XENLA      CAICGDRATGKHYGASSCDGCKGFFRRSVRK-----NHVYA-CRFSRQCVVDKDKRN
HN4B_XENLA      CAICGDRATGKHYGASSCDGCKGFFRRSVRK-----SHIYT-CRFSRQCVVDKDKRN
HN4G_HUMAN      CAICGDRATGKHYGASTCDGCKGFFRRSIRK-----SHVYT-CRFSRQCVVDKDKRN
HN4G_MOUSE      CAICGDRATGKHYGASSCDGCKGFFRRSIRK-----NHQYT-CRFARNQCVVDKDKRN
S36218          CAICGDRSSGKHYGVYSCEGCKGFFKRTVRK-----DLTYT-CRDNKDCLIDKRQRN
NP_035435.1     CAICGDRSSGKHYGVYSCEGCKGFFKRTVRK-----DLTYT-CRDNKDCLIDKRQRN
NP_036937.1     CAICGDRSSGKHYGVYSCEGCKGFFKRTVRK-----DLTYT-CRDNKDCLIDKRQRN
NP_002948.1     CAICGDRSSGKHYGVYSCEGCKGFFKRTVRK-----DLTYT-CRDNKDCLIDKRQRN
RXRA_XENLA      CAICGDRSSGKHYGVYSCEGCKGFFKRTVRK-----DLTYT-CRDSKDCMIDKRQRN
RXRA_BRARE      CAICGDRSSGKHYGVYSCEGCKGFFKRTVRK-----DLTYT-CRDNKDCQIDKRQRN
NP_008848.1     CAICGDRSSGKHYGVYSCEGCKGFFKRTVRK-----DLIYT-CRDNKDCLIDKRQRN
NP_033133.1     CAICGDRSSGKHYGVYSCEGCKGFFKRTVRK-----DLIYT-CRDNKDCLIDKRQRN
NP_990625.1     CAICGDRSSGKHYGVYSCEGCKGFFKRTVRK-----DLIYT-CRDNKDCLIDKRQRN
RXRG_XENLA      CAICGDRSSGKHYGVYSCEGCKGFFKRTVRK-----DLVYT-CRDSKDCMIDKRQRN
NP_035436.1     CAICGDRSSGKHYGVYSCEGCKGFFKRTVRK-----DLTYT-CRDNKDCTVDKRQRN
RXRB_RAT        CAICGDRSSGKHYGVYSCEGCKGFFKRTVRK-----DLTYT-CRDNKDCTVDKRQRN
USP_BOMMO       CSICGDRASGKHYGVYSCEGCKGFFKRTVRK-----DLTYA-CREDKNCIIDKRQRN
USP_MANSE       CSICGDRASGKHYGVYSCEGCKGFFKRTVRK-----DLTYA-CREDRNCIIDKRQRN
USP_CHOFO       CSICGDRASGKHYGVYSCEGCKGFFKRTVRK-----DLSYA-CREERNCIIDKRQRN
NP_476781.1     CSICGDRASGKHYGVYSCEGCKGFFKRTVRK-----DLTYA-CRENRNCIIDKRQRN
THA_APTPA       CVVCGDKATGYHYRCITCEGCKGFFRRTIQKNL-----HPTYT-CKYDGCCEVIDKITRN
THA_CAIMO       CVVCGDKATGYHYRCITCEGCKGFFRRTIQKNL-----HPTYT-CKYDGCCEVIDKITRN
NP_990644.1     CVVCGDKATGYHYRCITCEGCKGFFRRTIQKNL-----HPTYT-CKYDGCCEVIDKITRN
THA_PYGAD       CVVCGDKATGYHYRCITCEGCKGFFRRTIQKNL-----HPTYT-CKYDGCCEVIDKITRN
THA_MOUSE       CVVCGDKATGYHYRCITCEGCKGFFRRTIQKNL-----HPTYT-CKYDSCCEVIDKITRN
THA_PIG         CVVCGDKATGYHYRCITCEGCKGFFRRTIQKNL-----HPTYT-CKYDSCCEVIDKITRN
THA1_SHEEP      CVVCGDKATGYHYRCITCEGCKGFFRRTIQKNL-----HPTYT-CKYDSCCEVIDKITRN
CAA68539.1      CVVCGDKATGYHYRCITCEGCKGFFRRTIQKNL-----HPSYT-CKYDGCCEVIDKITRN
THAA_XENLA      CVVCSDKATGYHYRCITCEGCKGFFRRTIQKNL-----HPSYT-CKYDGCCEVIDKITRN
THAB_XENLA      CVVCSDKATGYHYRCITCEGCKGFFRRTIQKNL-----HPSYT-CKYDGCCEVIDKITRN
THA_RANCA       CVVCSDKATGYHYRCITCEGCKGFFRRTIQKNL-----HPSYT-CKYDGCCEVIDKITRN
NP_571471.1     CVVCGDKATGYHYRCITCEGCKGFFRRTIQKNL-----HPSYT-CKYDSCCEVIDKITRN
THA_SALSA       CVVCGDKATGYHYRCITCEGCKGFFRRTIQKNL-----HPSYT-CKYDGCCEVIDKITRN
THAB_PAROL      CVVCGDKATGYHYRCITCEGCKGFFRRTIQKNL-----HPSYT-CKYDSCCEVIDKITRN
```

THAA\_PAROL CVVCGDKATGYHYRCITCEGCKGFFRRTIQKNL-----HPSYS-CKYEGCCIIDKITRN  
THA\_HIPHI CVVCGDKATGYHYRCITCEGCKGFFRRTIQKNL-----HPAYS-CKYEGCCIIDKITRN  
NP\_000452.2 CVVCGDKATGYHYRCITCEGCKGFFRRTIQKNL-----HPSYS-CKYEGKCVIDKVTRN  
THB2\_HUMAN CVVCGDKATGYHYRCITCEGCKGFFRRTIQKNL-----HPSYS-CKYEGKCVIDKVTRN  
NP\_033406.1 CVVCGDKATGYHYRCITCEGCKGFFRRTIQKSL-----HPSYS-CKYEGKCIIDKVTRN  
THB1\_RAT CVVCGDKATGYHYRCITCEGCKGFFRRTIQKSL-----HPSYS-CKYEGKCIIDKVTRN  
THB1\_MOUSE CVVCGDKATGYHYRCITCEGCKGFFRRTIQKSL-----HPSYS-CKYEGKCIIDKVTRN  
THB2\_RAT CVVCGDKATGYHYRCITCEGCKGFFRRTIQKSL-----HPSYS-CKYEGKCIIDKVTRN  
THB1\_SHEEP CVVCGDKATGYHYRCITCEGCKGFFRRTIQKNL-----HPSYS-CKYEGKCVIDKVTRN  
THB\_CHICK CVVCGDKATGYHYRCITCEGCKGFFRRTIQKNL-----HPTYS-CKYEGKCVIDKVTRN  
NP\_571415.1 CVVCGDKATGYHYRCITCEGCKGFFRRTIQKNL-----NPTYA-CKYEGKCVIDKVTRN  
THB\_PAROL CVVCGDKATGYHYRCITCEGCKGFFRRTIQKNL-----HPSYS-CKYEGKCVIDKVTRN  
THBA\_XENLA CVVCGDKATGYHYRCITCEGCKGFFRRTIQKNL-----HPSYS-CKYEGKCVIDKVTRN  
THBB\_XENLA CVVCGDKATGYHYRCITCEGCKGFFRRTIQKNL-----HPSYS-CKYEGKCVIDKVTRN  
THB\_RANCA CVVCGDKATGYHYRCITCEGCKGFFRRTIQKNL-----HPSYS-CKYEGKCVIDKVTRN  
ECR\_AEDAE CLVCGDRESGYHYNALTCEGCKGFFRRSVTK-----NAVYC-CKFGHACEMDMYMR  
ECR\_CHITE CLVCGDRASGYHYNALTCEGCKGFFRRSVTK-----NAVYC-CKFGHECEMDMYMR  
ECR\_LUCCU CLVCGDRASGYHYNALTCEGCKGFFRRSVTK-----NAVYC-CKFGHACEMDMYMR  
NP\_724460.1 CLVCGDRASGYHYNALTCEGCKGFFRRSVTK-----SAVYC-CKFGRACEMDMYMR  
ECR\_HELVI CLVCGDRASGYHYNALTCEGCKGFFRRSVTK-----NAVYI-CKFGHACEMDIYMR  
ECR\_MANSE CLVCGDRASGYHYNALTCEGCKGFFRRSVTK-----NAVYI-CKFGHACEMDMYMR  
ECR\_BOMMO CLVCGDRASGYHYNALTCEGCKGFFRRSVTK-----NAVYI-CKFGHACEMDMYMR  
NP\_000367.1 CGVCGDRATGFHFNAMTCEGCKGFFRRSMKR-----KALFT-CPFNGDCRITKDNRR  
VDR\_BOVIN CGVCGDRATGFHFNAMTCEGCKGFFRRSMKR-----KALFT-CPFNGDCRITKDNRR  
NP\_058754.1 CGVCGDRATGFHFNAMTCEGCKGFFRRSMKR-----KALFT-CPFNGDCRITKDNRR  
VDR\_MOUSE CGVCGDRATGFHFNAMTCEGCKGFFRRSMKR-----KALFT-CPFNGDCRITKDNRR  
NP\_990429.1 CGVCGDRATGFHFNAMTCEGCKGFFRRSMKR-----KAMFT-CPFNGDCKITKDNRR  
VDR\_COTJA CGVCGDKATGFHFNAMTCEGCKGFFRRSMKR-----KAMFT-CPFNGDCRITKDNRR  
VDR\_XENLA CGVCGDKATGFHFNAMTCEGCKGFFRRSMKR-----KAMFT-CPFNGDCRITKDNRR  
A34714 CFVCNDKSSGYHYGVSACEGCKGFFRRSIQK-----NMVYT-CHRDKNCI INKVTRN  
RRG2\_HUMAN CFVCNDKSSGYHYGVSACEGCKGFFRRSIQK-----NMVYT-CHRDKNCI INKVTRN  
RRG2\_MOUSE CFVCNDKSSGYHYGVSACEGCKGFFRRSIQK-----NMVYT-CHRDKNCI INKVTRN  
NP\_000957.1 CFVCNDKSSGYHYGVSACEGCKGFFRRSIQK-----NMVYT-CHRDKNCI INKVTRN  
RRG\_NOTVI CFVCNDKSSGYHYGVSACEGCKGFFRRSIQK-----NMVYT-CHRDKNQ INKVTRN  
RRG\_XENLA CFVCNDKSSGYHYGVSACEGCKGFFRRSIQK-----NMVYT-CHRDKNQ INKVTRN  
NP\_571414.1 CFVCQDKSSGYHYGVSACEGCKGFFRRSIQK-----NMVYT-CHRDKNQ INKVTRN  
AAD05222.1 CFVCQDKSSGYHYGVSACEGCKGFFRRSIQK-----NMVYT-CHRDKNCI INKVTRN  
RRA\_MOUSE CFVCQDKSSGYHYGVSACEGCKGFFRRSIQK-----NMVYT-CHRDKNCI INKVTRN  
NP\_989867.1 CFVCQDKSSGYHYGVSACEGCKGFFRRSIQK-----NMVYT-CHRDKNCI INKVTRN  
RRA\_XENLA CFVCQDKSSGYHYGVSACEGCKGFFRRSIQK-----NMVYT-CHRDKNCI INKVTRN  
RRA\_NOTVI CFVCQDKSSGYHYGVSACEGCKGFFRRSIQK-----NMVYT-CHRDKTCI INKVTRN  
RRB\_COTJA CFVCQDKSSGYHYGVSACEGCKGFFRRSIQK-----NMVYT-CHRDKNCV INKVTRN  
S13512 CFVCQDKSSGYHYGVSACEGCKGFFRRSIQK-----NMVYT-CHRDKNCV INKVTRN  
RRB\_HUMAN CFVCQDKSSGYHYGVSACEGCKGFFRRSIQK-----NMIYT-CHRDKNCV INKVTRN  
RRB\_MOUSE CFVCQDKSSGYHYGVSACEGCKGFFRRSIQK-----NMIYT-CHRDKNCV INKVTRN  
RRB\_NOTVI CFVCQDKSSGYHYGVSACEGCKGFFRRSIQK-----NMIYT-CHRDKNCV INKVTRN  
RRA\_FUGRU CFVCQDKSSGYHYGVSACEGCKGFFRRSIQK-----NMVYT-CHREKNCI INKVTRN  
AAA19972.1 CRVCGDKASGFHYGVHACEGCKGFFRRTIRM-----KLEYEKCDRI--CKIQKKNRN  
NP\_006229.1 CRVCGDKASGFHYGVHACEGCKGFFRRTIRM-----KLEYEKCS--CKIQKKNRN  
PPAS\_XENLA CKICGDRASGFHYGVHACEGCKGFFRRTIRM-----RLQYEHCDRN--CKIQKKNRN  
CAA40856.1 CRICGDKASGYHYGVHACEGCKGFFRRTIRL-----KLVYDKCDRS--CKIQKKNRN  
NP\_037328.1 CRICGDKASGYHYGVHACEGCKGFFRRTIRL-----KLAYDKCDRS--CKIQKKNRN  
CAA68898.1 CRICGDKASGYHYGVHACEGCMGFFRRTIRL-----KLVYDKCDRS--CKIQKKNRN  
PPAR\_PHACI CRICGDKASGYHYGVHACEGCKGFFRRTIRL-----KLAYDKCDRS--CKIQKKNRN  
PPAR\_CANFA CRICGDRASGFHYGVHACEGCKGFFRRTIRL-----KLAYDKCDRS--CKIQKKNRN  
PPAR\_CAVPO CRICGDKASGYHYGVHACEGCKGFFRRTIRL-----KLVYDKCDRS--CKIQKKNRN  
PPAR\_XENLA CRVCSKASGFHYGVHACEGCKGFFRRTIRL-----KLVYDRCEM--CKIQKKNRN

NP\_035276.1 CRVCGDKASGFHYGVHACEGCKGFFRRTIRL-----KLIYDRCDLN--CRIHKKSRN  
NP\_056953.2 CRVCGDKASGFHYGVHACEGCKGFFRRTIRL-----KLIYDRCDLN--CRIHKKSRN  
CAA73382.2 CRVCGDKASGFHYGVHACEGCKGFFRRTIRL-----KLIYDRCDLN--CRIHKKSRN  
PPAT\_CRIGR CRVCGDKASGFHYGVHACEGCKGFFRRTIRL-----KLIYDRCDLN--CRIHKKSRN  
PPAT\_MACMU CRVCGDKASGFHYGVHACEGCKGFFRRTIRL-----KLIYDRCDLN--CRIHKKSRN  
PPAT\_PIG CRVCGDKASGFHYGVHACEGCKGFFRRTIRL-----KLIYDRCDLN--CRIHKKSRN  
NP\_851367.1 CRVCGDKASGFHYGVHACEGCKGFFRRTIRL-----KLIYDRCDLN--CRIHKKSRN  
PPAT\_RABIT CRVCSDKASGFHYGVHACEGCKGFFRRTIRL-----KLIYDRCDLN--CRIHKKSRN  
PPAT\_XENLA CRVCGDKASGFHYGVHACEGCKGFFRRTIRL-----KLIYERCDLN--CRIHKKSRN  
CAB53540.1 CKVCGDVASGFHYGVLACEGCKGFFRRSIQQ-----NIQYKRCLKNENCSIVRINRN  
NP\_665718.1 CKVCGDVASGFHYGVHACEGCKGFFRRSIQQ-----NIQYKRCLKNENCSIVRINRN  
E75\_CHOFU CRVCGDKASGFHYGVHACEGCKGFFRRSIQQ-----KIQYRPCTKNQQCSILRINRN  
E75\_MANSE CRVCGDKASGFHYGVHACEGCKGFFRRSIQQ-----KIQYRPCTKNQQCSILRINRN  
E75A\_DROME CRVCGDKASGFHYGVHACEGCKGFFRRSIQQ-----KIQYRPCTKNQQCSILRINRN  
E75\_GALME CRVCGDKASGFHYGVHACEGCKGFFRRSIQQ-----KIQYRPCTKNQQCSILRINRN  
E75\_METEN CRVCGDKASGFHYGVHACEGCKGFFRRSIQQ-----KIQYRPCTKNQQCSILRINRN  
E75C\_DROME CRVCGDKASGFHYGVHACEGCKGFFRRSIQQ-----KIQYRPCTKNQQCSILRINRN  
NP\_038674.1 CKICGDKSSGIHYGVITCEGCKGFFRRSQS-----NATYS-CPRQKNCLIDRTSRN  
NP\_599022.1 CKICGDKSSGIHYGVITCEGCKGFFRRSQS-----NATYS-CPRQKNCLIDRTSRN  
RORB\_HUMAN CKICGDKSSGIHYGVITCEGCKGFFRRSQN-----NASYS-CPRQRNCLIDRTNRN  
RORB\_RAT CKICGDKSSGIHYGVITCEGCKGFFRRSQN-----NASYS-CPRQRNCLIDRTNRN  
BAB16893.1 CAVCSYASGYHYGVWSCEGCKAFFKRSIQG-----HNDYV-CPATNQCTIDRNRRK  
ESR1 ICTPU CSVCSYASGYHYGVWSCEGCKAFFKRSIQG-----HNDYV-CPATNQCTIDRNRRK  
ESR1\_HORSE CAVCNDYASGYHYGVWSCEGCKAFFKRSIQG-----HNDYM-CPATNQCTIDKNRRK  
ESR1\_PIG CAVCNDYASGYHYGVWSCEGCKAFFKRSIQG-----HNDYM-CPATNQCTIDKNRRK  
NP\_031982.1 CAVCNDYASGYHYGVWSCEGCKAFFKRSIQG-----HNDYM-CPATNQCTIDKNRRK  
NP\_036821.1 CAVCNDYASGYHYGVWSCEGCKAFFKRSIQG-----HNDYM-CPATNQCTIDKNRRK  
ESR1\_MESAU CAVCNDYASGYHYGVWSCEGCKAFFKRSIQG-----HNDYM-CPATNQCTIDKNRRK  
ESR1\_HUMAN CAVCNDYASGYHYGVWSCEGCKAFFKRSIQG-----HNDYM-CPATNQCTIDKNRRK  
ESR1\_XENLA CAVCSYASGYHYGVWSCEGCKAFFKRSIQG-----HNDYM-CPATNQCTIDKNRRK  
ESR1\_POEGU CAVCNDYASGYHYGVWSCEGCKAFFKRSIQG-----HNDYM-CPATNQCTIDKNRRK  
NP\_990514.1 CAVCNDYASGYHYGVWSCEGCKAFFKRSIQG-----HNDYM-CPATNQCTIDKNRRK  
ESR1\_SHEEP CAVCNDYASGYHYGVWSCEGCKAFFKRSIQG-----HNDYM-CPATNQCTIDKNRRK  
ESR1\_OREAU CAVCSYASGYHYGVWSCEGCKAFFKRSIQG-----HNDYM-CPATNQCTIDKNRRK  
ESR1\_ORENI CAVCSYASGYHYGVWSCEGCKAFFKRSIQG-----HNDYM-CPATNQCTIDKNRRK  
ESR1\_PAGMA CAVCSYASGYHYGVWSCEGCKAFFKRSIQG-----HNDYM-CPATNQCTIDKNRRK  
ESR1\_SPAAU CAVCSYASGYHYGVWSCEGCKAFFKRSIQG-----HNDYM-CPATNQCTIDKNRRK  
ESR1\_ORYLA CAVCSYASGYHYGVWSCEGCKAFFKRSIQG-----HNDYM-CPATNQCTIDKNRRK  
ESR1\_ONCMY CAVCSDFASGYHYGVWSCEGCKAFFKRSIQG-----HNDYM-CPATNQCTMDRNRRK  
ESR1\_SALSA CAVCSDFASGYHYGFWSCEGCKAFFKRSIQG-----HNDYM-CPATNQCTMDRNRRK  
ESR2\_ANGJA CAVCHDYASGYHYGVWSCEGCKAFFKRSIQG-----HNGYI-CPATNQCTIDKNRRK  
ESR2\_MICUN CAVCHDYASGYHYGVWSCEGCKAFFKRSIQG-----HNDYI-CPATNQCTIDKNRRK  
ESR2\_BOVIN CAVCSYASGYHYGVWSCEGCKAFFKRSIQG-----HNDYI-CPATNQCTIDKNRRK  
ESR2\_SHEEP CAVCSYASGYHYGVWSCEGCKAFFKRSIQG-----HNDYI-CPATNQCTIDKNRRK  
ESR2\_MOUSE CAVCSYASGYHYGVWSCEGCKAFFKRSIQG-----HNDYI-CPATNQCTIDKNRRK  
ESR2\_RAT CPVCSYASGYHYGVWSCEGCKAFFKRSIQG-----HNDYI-CPATNQCTIDKNRRK  
ESR2\_CALJA CAVCSYASGYHYGVWSCEGCKAFFKRSIQG-----HNDYI-CPATNQCTIDKNRRK  
NP\_001428.1 CAVCSYASGYHYGVWSCEGCKAFFKRSIQG-----HNDYI-CPATNQCTIDKNRRK  
ESR2\_PIG CAVCSYASGYHYGVWSCEGCKAFFKRSIQG-----HNDYI-CPATNQCTIDKNRRK  
ESR2\_COTJA CAVCSYASGYHYGVWSCEGCKAFFKRSIQG-----HNDYI-CPATNQCTIDKNRRK  
NP\_990125.1 CAVCSYASGYHYGVWSCEGCKAFFKRSIQG-----HNDYI-CPATNQCTIDKNRRK  
ESR2\_STUVU CAVCSYASGYHYGVWSCEGCKAFFKRSIQG-----HNDYI-CPATNQCTIDKNRRK  
ESR2 ICTPU CVVCHDYASGYHYGVWSCEGCKAFFKRSIQG-----HNDYI-CPATNQCTIDKNRRK  
ESR2\_SPAAU CAVCHDYASGYHYGVWSCEGCKAFFKRSIQG-----HNDYI-CPATNQCTIDKNRRK  
ESR3\_MICUN CAVCHDYASGYHYGVWSCEGCKAFFKRSIQG-----DNEYI-CPATNECTIDKNRRK  
ESR2\_ORENI CAVCHDYASGYHYGVWSCEGCKAFFKRSIQG-----HNDYI-CPATNQCTIDKNRRK  
ESR2\_ONCMY CAVCSYASGYHYGVWSCEGCKAFFKRSIQG-----HNDYI-CPATNQCTIDKNRRK

ERR1\_HUMAN CLVCGDVASGYHYGVASCEACKAFFKRTIQG-----SIEYS-CPASNECEITKRRRK  
ERR1\_MOUSE CLVCGDVASGYHYGVASCEACKAFFKRTIQG-----SIEYS-CPASNECEITKRRRK  
ERR2\_RAT CLVCGDIASGYHYGVASCEACKAFFKRTIQG-----NIEYS-CPATNECEITKRRRK  
NP\_004443.2 CLVCGDIASGYHYGVASCEACKAFFKRTIQG-----NIEYS-CPATNECEITKRRRK  
ERR2\_MOUSE CLVCGDIASGYHYGVASCEACKAFFKRTIQG-----NIEYN-CPATNECEITKRRRK  
NP\_036065.1 CLVCGDIASGYHYGVASCEACKAFFKRTIQG-----NIEYS-CPATNECEITKRRRK  
ANDR\_HUMAN CLICGDEASGCHYGALTCGSCKVFFKRAAEG-----KQKYL CASRNDCTIDKFRRK  
ANDR\_PANTR CLICGDEASGCHYGALTCGSCKVFFKRAAEG-----KQKYL CASRNDCTIDKFRRK  
ANDR\_MACFA CLICGDEASGCHYGALTCGSCKVFFKRAAEG-----KQKYL CASRNDCTIDKFRRK  
ANDR\_PAPHA CLICGDEASGCHYGALTCGSCKVFFKRAAEG-----KQKYL CASRNDCTIDKFRRK  
ANDR\_EULFC CLICGDEASGCHYGALTCGSCKVFFKRAAEG-----KQKYL CASRNDCTIDKFRRK  
ANDR\_CANFA CLICGDEASGCHYGALTCGSCKVFFKRAAEG-----KQKYL CASRNDCTIDKFRRK  
ANDR\_RABIT CLICGDEASGCHYGALTCGSCKVFFKRAAEG-----KQKYL CASRNDCTIDKFRRK  
NP\_036634.1 CLICGDEASGCHYGALTCGSCKVFFKRAAEG-----KQKYL CASRNDCTIDKFRRK  
NP\_038504.1 CLICGDEASGCHYGALTCGSCKVFFKRAAEG-----KQKYL CASRNDCTIDKFRRK  
GCR\_SAGOE CLVCSDEASGCHYGVLTCGSCKVFFKRAVEG-----QHNYL CAGRNDCTIDKIRRK  
GCR\_SAIBB CLVCSDEASGCHYGVLTCGSCKVFFKRAVEG-----QHNYL CAGRNDCTIDKIRRK  
GCR\_AOTNA CLVCSDEASGCHYGVLTCGSCKVFFKRAVEG-----QHNYL CAGRNDCTIDKIRRK  
NP\_000167.1 CLVCSDEASGCHYGVLTCGSCKVFFKRAVEG-----QHNYL CAGRNDCTIDKIRRK  
GCR\_PIG CLVCSDEASGCHYGVLTCGSCKVFFKRAVEG-----QHNYL CAGRNDCTIDKIRRK  
GCR\_SAISC CLVCSDEASGCHYGVLTCGSCKVFFKRAVEG-----QHNYL CAGRNDCTIDKIRRK  
GCR\_TUPGB CLVCSDEASGCHYGVLTCGSCKVFFKRAVEG-----QHNYL CAGRNDCTIDKIRRK  
GCR\_RABIT CLVCSDEASGCHYGVLTCGSCKVFFKRAVKG-----QHNYL CAGRNDCTIDKIRRK  
GCR\_RAT CLVCSDEASGCHYGVLTCGSCKVFFKRAVEG-----QHNYL CAGRNDCTIDKIRRK  
NP\_032199.1 CLVCSDEASVCHYGVLTCGSCKVFFKRAVEG-----QHNYL CAGRNDCTIDKIRRK  
GCR\_CAVPO CLVCSDELSGCHYGVLTCGSCKVFFKRAVEG-----QHNYL CAGRNDCTIDKIRRE  
GCR\_XENLA CLVCSDEASGCHYGVLTCGSCKVFFKRAVEG-----QHNYL CAGRNDCTIDKIRRK  
GCR\_ONCMY CLVCSDEASGCHYGVLTCGSCKVFFKRAVEGWRRARQNTDGOHNYL CAGRNDCTIDKIRRK  
GCR\_PAROL CLVCSDEASGCHYGVLTCGSCKVFFKRAVEGWRRARQNTDGOHNYL CAGRNDCTIDKIRRK  
MCR\_MOUSE CLVCGDEASGCHYGVVTCGSCKVFFKRAVE-----HNYL CAGRNDCTIDKIRRK  
NP\_037263.1 CLVCGDEASGCHYGVVTCGSCKVFFKRAVEG-----QHNYL CAGRNDCTIDKIRRK  
MCR\_TUPGB CLVCGDGASGCHYGVVTCGSCKVFFKRAVEG-----QHNYL CAGRNDCTIDKIRRK  
MCR\_SAISC CLVCGDEASGCHYGVVTCGSCKVFFKRAVEG-----QHNYL CAGRNDCTIDKIRRK  
NP\_000892.1 CLVCGDEASGCHYGVVTCGSCKVFFKRAVEG-----QHNYL CAGRNDCTIDKIRRK  
MCR\_XENLA CLVCGDEASGCHYGVVTCGSCKVFFKRAVEGKCSR-----QHSYL CAGRNDCTIDKIRRK  
NP\_032855.1 CLICGDEASGCHYGVLTCGSCKVFFKRAVEG-----QHNYL CAGRNDCTIDKIRRK  
NP\_074038.1 CLICGDEASGCHYGVLTCGSCKVFFKRAVEG-----QHNYL CAGRNDCTIDKIRRK  
PRGR\_RABIT CLICGDEASGCHYGVLTCGSCKVFFKRAVEG-----QHNYL CAGRNDCTIDKIRRK  
PRGR\_SHEEP CLICGDEASGCHYGVLTCGSCKVFFKRAVEG-----QHNYL CAGRNDCTIDKIRRK  
PRGR\_HUMAN CLICGDEASGCHYGVLTCGSCKVFFKRAVEG-----QHNYL CAGRNDCTIDKIRRK  
NP\_990593.1 CLICGDEASGCHYGVLTCGSCKVFFKRAVEG-----QHNYL CAGRNDCTIDKIRRK  
\* : \* \* : \* : \* \* \* : \* \* : \*

FTF1\_BOMMO RCPFCRFQKCLDVG MKLEAVRADMRGGRNKFGPMYKRDRARKLQMMRQRQ-----  
NP\_524143.2 RCPYCRFQKCLEVGMKLEAVRADMRGGRNKFGPMYKRDRARKLQVMRQRQ-----  
NP\_004950.2 RCPFCRFQKCLTVGMRLEAVRADMRGGRNKFGPMYKRDRALKQOKKAQIR-----  
STF1\_MOUSE RCPFCRFQKCLTVGMRLEAVRADMRGGRNKFGPMYKRDRALKQOKKAQIR-----  
NP\_445796.1 RCPFCRFQKCLTVGMRLEAVRADMRGGRNKFGPMYKRDRALKQOKKAQIR-----  
NP\_776828.1 RCPFCRFQKCLTVGMRLEAVRADMRGGRNKFGPMYKRDRALKQOKKAQIR-----  
STF1\_PIG RCPFCRFQKCLTVGMRLEAVRADMRGGRNKFGPMYKRDRALKQOKKAQIR-----  
AAA28543.1 KCPACRFEKCLQKGMKLEA IREDRTRGGRSTYQCSYTL PMSMLSPLLSPDQ-----  
7UP2\_DROME QCQYCRLLKCLKMGMRREAVQRGRVPPTQPGLAGMHGQYQIANGDPMG----IAG--  
NP\_524325.1 QCQYCRLLKCLKMGMRREAVQRGRVPPTQPGLAGMHGQYQIANGDPMG----IAG--  
NP\_066285.1 QCQYCRLLKCLKVGMRREAVQRGRMPPTQP----THGQFALTNGDPLNCHSYLSG--  
NP\_542956.1 QCQYCRLLKCLKVGMRREAVQRGRMPPTQP----THGQFALTNGDPLNCHSYLSG--  
NP\_989752.1 QCQYCRLLKCLKVGMRREAVQRGRMPPTQP----THGQFALTNGDPLNCHSYLSG--  
CAA54096.1 QCQYCRLLKCLKVGMRREAVQRGRMPPTQP----THGQFALTNGDPLNCHSYLSG--

NP\_005645.1 QCQYCRLKKCLKVGMRREAVQGRMPPTQP----NPGQYALTNGDPLNGHCYLSG--  
NP\_034281.1 QCQYCRLKKCLKVGMRREAVQGRMPPTQP----NPGQYALTNGDPLNGHCYLSG--  
NP\_786998.1 QCQYCRLKKCLKVGMRREAVQGRMPPTQP----NPGQYALTNGDPLNGHCYLSG--  
CAA54248.1 QCRYCRLKKCFRAGMKKEAVQNERDRISTR--SSYEDSSL-PSINALLQAEVL----  
NP\_032287.1 QCRYCRLKKCFRAGMKKEAVQNERDRISTR--SSYEDSSL-PSINALLQAEVL----  
NP\_071516.1 QCRYCRLKKCFRAGMKKEAVQNERDRISTR--SSYEDSSL-PSINALLQAEVL----  
HN4A\_XENLA QCRYCRLKKCFRAGMKKEAVQNERDRISTR--SSYEDSSL-PSINVLQAEVL----  
HN4B\_XENLA QCRYCRLRKCFRAGMKKEAVQNERDRISMRR--SSYEDNGS-LSINVLQAEAM----  
HN4G\_HUMAN QCRYCRLRKCFRAGMKKEAVQNERDRISTR--STFDGSNI-PSINTLAQAEVR----  
HN4G\_MOUSE QCRYCRLRKCFRAGMKKEAVQNERDRISTR--STYEGSNI-PSINTLAQAEVR----  
S36218 QCRYCRLRKCFCAGMKKEAVQNERDRISCR--TSNDDPDPGNGLSVISLVKA----  
NP\_035435.1 RCQYCRYQKCLAMGMKREAVQEERQGRGKDRN-ENEVESTSSA-NEDMPVEKIL----  
NP\_036937.1 RCQYCRYQKCLAMGMKREAVQEERQGRGKDRN-ENEVESTSSA-NEDMPVEKIL----  
NP\_002948.1 RCQYCRYQKCLAMGMKREAVQEERQGRGKDRN-ENEVESTSSA-NEDMPVERIL----  
RXRA\_XENLA RCQYCRYQKCLAMGMKREAVQEERQGRKERN-ENEVESTSSA-NEDMPVEKIL----  
RXRA\_BRARE RCQYCRYQKCLAMGMKREAVQEERQGRGRS--DNEVDSSSSF-NEEMPVEKIL----  
NP\_008848.1 RCQYCRYQKCLVMGMKREAVQEERQSRERA-ESEAECATSG-HEDMPVERIL----  
NP\_033133.1 RCQYCRYQKCLVMGMKREAVQEERQSRERA-ESEAECASSS-HEDMPVERIL----  
NP\_990625.1 RCQYCRYQKCLAMGMKREAVQEERQGRSERS-ENEAESTSGG-SEEMPVERIL----  
RXRG\_XENLA RCQYCRYQKCLAMGMKREAVQEERQSRREKS-DTEAESTSST-SEEMPVERIL----  
NP\_035436.1 RCQYCRYQKCLATGMKREAVQEERQGRGDK--DGDGDGAGGA-PEEMPVDRILE---  
RXRB\_RAT RCQYCRYQKCLATGMKREAVQEERQGRGDK--DGDGDGAGGA-PEEMPVDRILE---  
USP\_BOMMO RCQYCRYQKCLACGMKREAVQEERQRAART-EDAHPSSSVQ---ELSIERLLEL--  
USP\_MANSE RCQYCRYQKCLACGMKREAVQEERQRAARGT-EDAHPSSSVQ---ELSIERLLEI--  
USP\_CHOFU RCQYCRYQKCLACGMKREAVQEERQRNARGA-EDAHPSSSVQVSDLSIERL-----  
NP\_476781.1 RCQYCRYQKCLTCGMKREAVQEERQGRGARN-AGRLSASGGGSSGPGSVGGS-----  
THA\_APTPA QCQLCRFKKCISVGMAMDLVLDSDKRVAKRKLIEENRERRR----KEEMIKSL----  
THA\_CAIMO QCQLCRFKKCISVGMAMDLVLDSDKRVAKRKLIEENRERRR----KEEMIKSL----  
NP\_990644.1 QCQLCRFKKCISVGMAMDLVLDSDKRVAKRKLIEENRERRR----KEEMIKSL----  
THA\_PYGAD QCQLCRFKKCISVGMAMDLVLDSDKRVAKRKLIEENRERRR----KEEMIKSL----  
THA\_MOUSE QCQLCRFKKCIAVGMAMDLVLDSDKRVAKRKLIEQNRERRR----KEEMIRSL----  
THA\_PIG QCQLCRFKKCIAVGMAMDLVLDSDKRVAKRKLIEQNRERRR----KEEMIRSL----  
THA1\_SHEEP QCQLCRFKKCIAVGMAMDLVLDSDKRVAKRKLIEQNRERRR----KEEMIRSL----  
CAA68539.1 QCQLCRFKKCIAVAMAMDLVLDSDKRVAKRKLIEQNRERRR----KEEMIRSL----  
THAA\_XENLA QCQLCRFKKCIAVGMAMDLVLDGKRVAKRKLIEENRQRRR----KEEMIKTL----  
THAB\_XENLA QCQLCRFKKCIAVGMAMDLVLDSDKRVAKRKLIEENRVRRR----KEEMIKTL----  
THA\_RANCA QCQLCRFKKCIAVGMAMDLVLDSDKRVAKRKLIEENRERRR----KEEMIKTL----  
NP\_571471.1 QCQLCRFRKCI SVGMAMDLVLDSDKRVAKRRLIEENREKRR----KEEIVKTL----  
THA\_SALSA QCQLCRFRKCI AVCMAMDLVLDSDKRVAKRRLIEENREKRR----KDEIVKTL----  
THAB\_PAROL QCQLCRFKKCIAVGMAMDLVLDSDKRVAKRRLIEENRERRK----KEEIVKTL----  
THAA\_PAROL QCQLCRFKKCISVGMAMDLVLDSDKRVAKRRLIEENREKRR----REEMVRTL----  
THA\_HIPHI QCQLCRFKKCISVGMAMDLVLDSDKRVAKRRLIEENREKRR----REEMVRTL----  
NP\_000452.2 QCQECRFKKCIYVGMATDLVLDSDKRLAKRKLIEENREKRR----REELQKSI----  
THB2\_HUMAN QCQECRFKKCIYVGMATDLVLDSDKRLAKRKLIEENREKRR----REELQKSI----  
NP\_033406.1 QCQECRFKKCIYVGMATDLVLDSDKRLAKRKLIEENREKRR----REELQKSI----  
THB1\_RAT QCQECRFKKCIYVGMATDLVLDSDKRLAKRKLIEENREKRR----REELQKSI----  
THB1\_MOUSE QCQECRFKKCIYVGMATDLVLDSDKRLAKRKLIEENREKRR----REELQKSI----  
THB2\_RAT QCQECRFKKCIYVGMATDLVLDSDKRLAKRKLIEENREKRR----REELQKSI----  
THB1\_SHEEP QCQECRFKKCIYVGMATDLVLDSDKRLAKRKLIEENREKRR----REELQKSM----  
THB\_CHICK QCQECRFKKCIFVGMATDLVLDSDKRLAKRKLIEENREKRR----REELQKTI----  
NP\_571415.1 QCQECRFKKCIAVGMATDLVLDSDKRLAKRKLIEENRERRR----REELQKTV----  
THB\_PAROL QCQECRFKKCIAVGMATDLVLDSDKRLAKRKLIEENRERRR----KEELQKTV----  
THBA\_XENLA QCQECRFKKCIAVGMATDLVLDSDKRLAKRKLIEENREKRR----KDEIQKSL----  
THBB\_XENLA QCQECRFKKCKTVGMATDLVLDSDKRLAKRKLIEENREKRR----KDEIQKSI----  
THB\_RANCA QCQECRFKKCIAVGMATDLVLDSDKRLAKRKLIEENREKRR----KDELQKTL----  
ECR\_AEDAE KCQECRLKKCLAVGMRPECVVPENQCAIKRKEKKAQKEKDK---VQTNATVSTT---  
ECR\_CHITE KCQECRLKKCLAVGMRPECVVPENQCAIKRKEKKAQKEKDK---VPGIVGSNTS---

ECR\_LUCCU KCQECRLKKCLAVGMRPECVVPENQCAMKRREKKAQKEKDK---IQTSVCATEI---  
NP\_724460.1 KCQECRLKKCLAVGMRPECVVPENQCAMKRREKKAQKEKDK---MTTSPSSQHG---  
ECR\_HELVI KCQECRLKKCLAVGMRPECVVPENQCAMKRREKKAQREKDK---LPVSTTTVDD---  
ECR\_MANSE KCQECRLKKCLAVGMRPECVVPENQCAMKRREKKAQREKDK---LPVSTTTVDD---  
ECR\_BOMMO KCQECRLKKCLAVGMRPECVVPENQCAMKRREKKAQREKDK---LPVSTTTVDD---  
NP\_000367.1 HCQACRLKRCVDIGMMKEFILTDEEVQRKREMILKRKEEEA---LKDSLRLPKLS---  
VDR\_BOVIN HCQACRLKRCVDIGMMKEFILTDEEVQRKREMILKRKEEEA---LKDSLRLPKLS---  
NP\_058754.1 HCQACRLKRCVDIGMMKEFILTDEEVQRKREMIMKRKEEEA---LKDSLRLPKLS---  
VDR\_MOUSE HCQACRLKRCVDIGMMKEFILTDEEVQRKREMIMKRKEEEA---LKDSLRLPKLS---  
NP\_990429.1 HCQACRLKRCVDIGMMKEFILTDEEVQRKREMILKRKEEEA---LKESLKPPLS---  
VDR\_COTJA HCQACRLKRCVDIGMMKEFILTDEEVQRKREMILKRKEEEA---LKESLKPPLS---  
VDR\_XENLA HCQACRLKRCVDIGMMKEFILTDEEVQRKRMINKRKEEEA---LKESLKPPLS---  
A34714 RCQYCRLOKCFEVGMSKEAVRNDRN-KKKK-EVKEEGSP-DSYELSPQLEELIT---  
RRG2\_HUMAN RCQYCRLOKCFEVGMSKEAVRNDRN-KKKK-EVKEEGSP-DSYELSPQLEELIT---  
RRG2\_MOUSE RCQYCRLOKCFEVGMSKEAVRNDRN-KKKK-EVKEEGSP-DSYELSPQLEELIT---  
NP\_000957.1 RCQYCRLOKCFEVGMSKEAVRNDRN-KKKK-EVKEEGSP-DSYELSPQLEELIT---  
RRG\_NOTVI RCQYCRLOKCFEVGMSKEAVRNDRN-KKKK-EIKEEVVT-DSYEMPPEMEALIQ---  
RRG\_XENLA RCQYCRLOKCFEVGMSKEAVRNDRN-KKKK-EIKEEVVLPDSYEMPPEMEELI----  
NP\_571414.1 RCQYCRLOKCFEVGMSKEAVRNDRN-KKKK-DVKDEVIPPESEYELSGELEELV----  
AAD05222.1 RCQYCRLOKCFEVGMSKESVRNDRN-KKKK-EVPKPECS-ESYTLTPEVGELIE---  
RRA\_MOUSE RCQYCRLOKCFEVGMSKESVRNDRN-KKKK-EAPKPECS-ESYTLTPEVGELIE---  
NP\_989867.1 RCQYCRLOKCFEVGMSKESVRNDRN-KKKK-DVPKTECS-ESYIVTPEVEELIE---  
RRA\_XENLA RCQYCRLOKCFEVGMSKESVRNDRN-KKKK-ESPKPEAI-ESYILSPETQDLIE---  
RRA\_NOTVI RCQYCRLOKCFEVGMSKESVRNDRN-KKKKQEAPKQECT-ESYIITPEVEDLV----  
RRB\_COTJA RCQYCRLOKCFEVGMSKESVRNDRN-KKKK-EPTKQEST-ENYEMTAELEDDLTE---  
S13512 RCQYCRLOKCFEVGMSKESVRNDRN-KKKK-EPTKQEST-ENYEMTAELEDDLTE---  
RRB\_HUMAN RCQYCRLOKCFEVGMSKESVRNDRN-KKKK-ETSKQECT-ESYEMTAELEDDLTE---  
RRB\_MOUSE RCQYCRLOKCFEVGMSKESVRNDRN-KKKK-EPKQECT-ESYEMTAELEDDLTE---  
RRB\_NOTVI RCQYCRLOKCFEVGMSKESVRNDRN-KKKK-EPIKQECI-ESLEMTAELEDDLTE---  
RRA\_FUGRU RCQYCRLOKCFEVGMSKESVRNDRN-KKKK-DEKKPECI-ENYVLPDTEMIN---  
AAA19972.1 KCQYCRFQKCLALGMSHNAIRFGRMPDGEKRKLVAGLTASEGCQHNPQLADL-----  
NP\_006229.1 KCQYCRFQKCLALGMSHNAIRFGRMPAEAKRKLAVAGLTANEGSQYNPQVADL-----  
PPAS\_XENLA KCQYCRFNKCLSLGMSHNAIRFGRMPSEKAKLKVAPVSDSAPDSP-VSDLD-----  
CAA40856.1 KCQYCRFHKCLSVGMSHNAIRFGRMPRSEKAKLKAELTCEHDLKDSETADL-----  
NP\_037328.1 KCQYCRFHKCLSVGMSHNAIRFGRMPRSEKAKLKAELTCEHDLKDSETADL-----  
CAA68898.1 KCQYCRFHKCLSVGMSHNAIRFGRMPRSEKAKLKAELTCEHDIEDSETADL-----  
PPAR\_PHACI KCQYCRFQKCLSDGMSHNAIRFGRMPRSEKAKLKAELTCEHDLSEVADL-----  
PPAR\_CANFA KCQYCRFHKCLSVGMSHNAIRFGRMPRSEKAKLKAELTCEQDPEDAETADL-----  
PPAR\_CAVPO KCQYCRFHKCLSVGMSHNAIRFGRMPRSEKAKLKAELVLTCDRDSEGAETADL-----  
PPAR\_XENLA KCQYCRFEKCLNVGMSHNAIRFGRMPRSEKAKLKAELVLMCDQDVKDSQADL-----  
NP\_035276.1 KCQYCRFQKCLAVGMSHNAIRFGRMPQAEKEKLLAEISS-DIDQLNPESADLR-----  
NP\_056953.2 KCQYCRFQKCLAVGMSHNAIRFGRMPQAEKEKLLAEISS-DIDQLNPESADLR-----  
CAA73382.2 KCQYCRFQKCLAVGMSHNAIRFGRMPQAEKEKLLAEISS-DIDQLNPESADLR-----  
PPAT\_CRIGR KCQYCRFQKCLAVGMSHNAIRFGRMPQAEKEKLLAEISS-DIDQLNPESADLR-----  
PPAT\_MACMU KCQYCRFQKCLAVGMSHNAIRFGRMPQAEKEKLLAEISS-DIDQLNPESADLR-----  
PPAT\_PIG KCQYCRFQKCLAVGMSHNAIRFGRMPQAEKEKLLAEISS-DIDQLNPESADLR-----  
NP\_851367.1 KCQYCRFQKCLAVGMSHNAIRFGRMPQAEKEKLLAEISS-DIDQLNPESADLR-----  
PPAT\_RABIT KCQYCRFQKCLAVGMSHNAIRFGRMPQAEKEKLLAEISS-DIDQLNPESADLR-----  
PPAT\_XENLA KCQYCRFQKCLAVGMSHNAIRFGRMPQAEKEKLLAEISS-DIDQLNPESADQR-----  
CAB53540.1 RCQQCRFKKCLSVGMSRDVRFGRIPKREKQRMLAEMQSAMNLANQLSS-----  
NP\_665718.1 RCQQCRFKKCLSVGMSRDVRFGRIPKREKQRMLAEMQSAMNLANQLSS-----  
E75\_CHOFU RCQYCRLLKKCIAVGMSRDVRFGRVPKREKARILAAMQSSSSRAHEQAA-----  
E75\_MANSE RCQYCRLLKKCIAVGMSRDVRFGRVPKREKARILAAMQSSSTRAHEQAA-----  
E75A\_DROME RCQYCRLLKKCIAVGMSRDVRFGRVPKREKARILAAMQSSSTQNRGQORAL-----  
E75\_GALME RCQYCRLLKKCIAVGMSRDVRFGRVPKREKARILAAMQ-SSSTRAHEQAAA-----  
E75\_METEN RCQYCRLLKKCIAVGMSRDVRFGRVPKREKAKILAAMQ-SVNAKSQERAVL-----  
E75C\_DROME RCQYCRLLKKCIAVGMSRDVRFGRVPKREKARIWRPCNRPRIAASSDPS-----

NP\_038674.1 RCQHCR LQKCLAVGMSRDAVKFGRMSKKQRDSL YAEVQKHRMQQQORDHQQ-----  
NP\_599022.1 RCQHCR LQKCLAVGMSRDAVKFGRMSKKQRDSL YAEVQKHRMQQQORDHQQ-----  
RORB\_HUMAN RCQHCR LQKCLALGMSRDAVKFGRMSKKQRDSL YAEVQKHQQRLQEQRQEQ-----  
RORB\_RAT RCQHCR LQKCLALGMSRDAVKFGRMSKKQRDSL YAEVQKHQQRLQEQRQQQ-----  
BAB16893.1 SCQACRLRKCYEVGMMKGGIRKDR-GGRSVRRERRR SNE-DRDKSSSDQCSR-----  
ESR1 ICTPU SCQACRLRKCYEVGMMKGGFRKER-GGRI IKHNRRPSGLK-ERERGYSKAQSG-----  
ESR1\_HORSE SCQACRLRKCYEVGMMKGGIRKDRRGGRMLKHKRQRDDGE-GRNEAGPSGDR-----  
ESR1\_PIG SCQACRLRKCYEVGMMKGGIRKDRRGGRMLKHKRQRDDGE-GRNEAVPPGDM-----  
NP\_031982.1 SCQACRLRKCYEVGMMKGGIRKDRRGGRMLKHKRQRDDLE-GRNEMGASGDM-----  
NP\_036821.1 SCQACRLRKCYEVGMMKGGIRKDRRGGRMLKHKRQRDDLE-GRNEMGTSGDM-----  
ESR1\_MESAU SCQACRLRKCYEVGMMKGGIRKDRRGGRMLKHKRQRDDLE-GRNDMGPSGDM-----  
ESR1\_HUMAN SCQACRLRKCYEVGMMKGGIRKDRRGGRMLKHKRQRDDGE-GRGEVGSAGDM-----  
ESR1\_XENLA SCQACRLRKCYEVGMMKGGIRKDRRGGRLLKHKRQKEEQE-QKNDVDPSEIR-----  
ESR1\_POEGU SCQACRLRKCYEVGMMKGGIRKDRRGGRVMKQKRQREEQD-SRNGEASSTEL-----  
NP\_990514.1 SCQACRLRKCYEVGMMKGGIRKDRRGEMMKQKRQREEQD-SRNGEASSTEL-----  
ESR1\_SHEEP SCQACRLRKCY-----  
ESR1\_OREAU SCQACRLRKCYEVGMMKGGMRKDR--GRVLRREKH--GPA-QR-QTSQNLPTHKASP  
ESR1\_ORENI SCQACRLRKCYEVGMMKGGMRKDR--GRVLRREKR--RAC-DRDKPAKDLPHTRAS-  
ESR1\_PAGMA SCQACRLRKCYEVGMMKGGMRKDR--GRVLRRDKQRTGTS-DRDKASKGLEHRT---  
ESR1\_SPAAU SCQACRLRKCYEVGMMKGGVRKDR--GRVLRDRKRRTGTS-DRDKASKGLEHRT---  
ESR1\_ORYLA SCQACRLRKCYEVGMMKGGVRKDR--IRILRRDKRRTGVG-DGDKVVKGQEHKT---  
ESR1\_ONCMY SCQACRLRKCYEVGMVKGGLRKDR-GGRVLRKDKRYCGPAGDREKPYGDLEH-----  
ESR1\_SALSA SCQACRLRKCYEVGMVKGGLRKDR-GGRVLRKDKRYCGPAGDREKPYGDLEH-----  
ESR2\_ANGJA SCQACRLRKCYEVGMMKCGVRRER-CTY--RGARHRR-MPHIRELAGTGGGARTQ--  
ESR2\_MICUN SCQACRLRKCYEVGMMKCGVRRER-CSY--RGARHRRGGLQPRDPTGRG-LVRVG--  
ESR2\_BOVIN SCQACRLRKCYEVGMVKCGSRER-CGY--RIVRRQRNSDEQLHCLSKTKRNGG---  
ESR2\_SHEEP SCQACRLRKCYEVGMVKCGSRER-CGY--RIVRRQRNSDEQLHCLSKTKRNGA---  
ESR2\_MOUSE SCQACRLRKCYEVGMVKCGSRER-CGY--RIVRRQRSASEQVHCLNKAARTSG---  
ESR2\_RAT SCQACRLRKCYEVGMVKCGSRER-CGY--RIVRRQRSSEQVHCLSKAKRNGG---  
ESR2\_CALJA SCQACRLRKCYEVGMVKCGSRER-CGY--RLVRRQGNAAEQHLHCAGKARSGG---  
NP\_001428.1 SCQACRLRKCYEVGMVKCGSRER-CGY--RLVRRQRSADQLHCAGKAKRSGG---  
ESR2\_PIG SCQACRLRKCYEVGMVKCGSRER-CGY--RIVRKQRNSEGHLHCLSRACKNGD---  
ESR2\_COTJA SCQACRLRKCYEVGMMKCGSRER-CGY--RILRRHRNSED---CMGKTKKYNEAAT  
NP\_990125.1 SCQACRLRKCYEVGMMKCGSRER-CGY--RILRRHRNSED---CMGKTKKYNEAAT  
ESR2\_STUVU SCQACRLRKCYEVGMMKCGSRER-CGY--RILRSHRGAEERVHCLGRARRYSE---  
ESR2 ICTPU SCQACRLRKCYEMGMMKCGARRER-CGY--RASRRTAPMRDGSARPVGVGQSQ---  
ESR2\_SPAAU SCQACRLHKCYNVGMTKCGMRKER-GNF--RDPQMRVTRLSSQGRTSGPSVLN---  
ESR3\_MICUN SCQACRLRKCYEVGMTKCGMRKER-GNY--RSPQMRRMTRLTSQGRDSSSVLT---  
ESR2\_ORENI SCQACRLRKCYEVGMTKCGIRKER-GNY--RNSQARRLTRLSSQGKTAEPKGIT---  
ESR2\_ONCMY SCQACRLRKCYEVGMMKCGLRDR-GSYQQRGAQQKRLARFSGRMRTSGPRS-----  
ERR1\_HUMAN ACQACRFTKCLRVMGMLKEGVRLDRVRGG--RQKYKRRPEVDPLPFPFPFPAGP-----  
ERR1\_MOUSE ACQACRFTKCLRVMGMLKEGVRLDRVRGG--RQKYKRRPEVDPLPFPFPFPAGP-----  
ERR2\_RAT SCQACRFMKCLKVGMGMLKEGVRLDRVRGG--RQKYKRRLDSENSPYLSLQISPP-----  
NP\_004443.2 SCQACRFMKCLKVGMGMLKEGVRLDRVRGG--RQKYKRRLDSESSPYLSLQISPP-----  
ERR2\_MOUSE SCQACRFMKCLKVGMGMLKEGVRLDRVRGG--RQKYKRRLDSENSPYLNLPI SPP-----  
NP\_036065.1 SCQACRFMKCLKVGMGMLKEGVRLDRVRGG--RQKYKRRI DAENSPYLNPLVQP-----  
ANDR\_HUMAN NCPSCRLRKCYEAGMTLGARKLKKLGNLKLQEEGEASSTTSPTTEETTQKLT-----  
ANDR\_PANTR NCPSCRLRKCYEAGMTLGARKLKKLGNLKLQEEGEASSTTSPTTEETTQKLT-----  
ANDR\_MACFA NCPSCRLRKCYEAGMTLGARKLKKLGNLKLQEEGEASSTTSPTTEETAQKLT-----  
ANDR\_PAPHA NCPSCRLRKCYEAGMTLGARKLKKLGNLKLQEEGEASSTTSPTTEETAQKLT-----  
ANDR\_EULFC NCPSCRLRKCYEAGMTLGARKLKKLGNLKLQEEGEASSTTSPTTEESSQKLT-----  
ANDR\_CANFA NCPSCRLRKCYEAGMTLGARKLKKLGNLKLQEEGEASNVTSPTEEPTQKLT-----  
ANDR\_RABIT NCPSCRLRKCYEAGMTLGARKLKKLGNLKLQEEGEASSASSPTEDTTQKLT-----  
NP\_036634.1 NCPSCRLRKCYEAGMTLGARKLKKLGNLKLQEEGENSSAGSPTEDPSQKMT-----  
NP\_038504.1 NCPSCRLRKCYEAGMTLGARKLKKLGNLKLQEEGENSNAGSPTEDPSQKMT-----  
GCR\_SAGOE NCPACRYRKCLQAGMNLEARKTKKK--IKGIQQATTGVSQETS ENPANKTIVP-----  
GCR\_SAIBB NCPACRYRKCLQAGMNLEARKTKKK--IKGIQQATTGVSQETS ENPANKTIVP-----

|             |                                                            |
|-------------|------------------------------------------------------------|
| GCR_AOTNA   | NCPACRYRKCLQAGMNLEARKTKKK--IKGIQQATTGVSQETSENANKTIVP----   |
| NP_000167.1 | NCPACRYRKCLQAGMNLEARKTKKK--IKGIQQATTGVSQETSENPKNKTIVP----  |
| GCR_PIG     | NCPACRYRKCLQAGMNLEARKTKKK--IKGIQQATTGVSQETSENSANKTIVP----  |
| GCR_SAISC   | NCPACRYRKCLQAGMNLEARKTKKKI--IKGIQQATTGVSQETSENANKTIVP----  |
| GCR_TUPGB   | NCPACRYRKCLQAGMNLEARKTKKK--IKGIQQTTTGISQETPENSANKTIVP----  |
| GCR_RABIT   | NCPACRYRKCLQAGMNLEARKTKKK--IKGIQQTSTGVSQETSENPSNRTVVP----  |
| GCR_RAT     | NCPACRYRKCLQAGMNLEARKTKKK--IKGIQQATAGVSQDTSENP-NKTIVPA---  |
| NP_032199.1 | NCPACRYRKCLQAGMNLEARKTKKK--IKGIQQATAGVSQDTSENA-NKTIVPA---  |
| GCR_CAVPO   | NCPACRYRKCLQAGMNLQARKTKKK--IKGIQQATTGVSQNTSENP-NKTIVPA---  |
| GCR_XENLA   | NCPACRYRKCLQAGMNLEARKTKKK--IKGIQQSTTATARESPETSMTRTLVP----  |
| GCR_ONCMY   | NCPACRFRKCLQAGMNLEARKNKKL--IRLKGQQTMEPNPPPP-----           |
| GCR_PAROL   | NCPACRFRKCLQAGMNLEARKNKKL--IKMKVHRPTGSAEPISN-----          |
| MCR_MOUSE   | NCPACRLQKCLQAGMNLGARKSKKLGKLGKLHHEEQPQQPPPPPPQSPEEGTTY---- |
| NP_037263.1 | NCPACRLQKCLQAGMNLGARKSKKLGKLGKLHHEEQPQQPPPPPPQSPEEGT-----  |
| MCR_TUPGB   | NCPACRLQKCLQAGMNLGARKSKKLGKLGKLHHEEQPQQPPP--PQSPEEGTTY---- |
| MCR_SAISC   | NCPACRLQKCLQAGMNLGARRSKKLGKLGKIHEEQPQQQ--PPPPPPPPQSPE----- |
| NP_000892.1 | NCPACRLQKCLQAGMNLGARKSKKLGKLGKIHEEQPQQQQPPPPPPPPQSP-----   |
| MCR_XENLA   | NCPACRLQKCLQAGMNLGARKSKKLGKLGKVHEEHPPQQPLQQTPTAS-----      |
| NP_032855.1 | NCPACRLRKCCQAGMVLGGRKFKKFNKVRVMR-TLDGVALPQSVGLPNESQA-----  |
| NP_074038.1 | NCPACRLRKCCQAGMVLGGRKFKKFNKVRVMR-ALDGVALPQSVAFPNESQT-----  |
| PRGR_RABIT  | NCPACRLRKCCQAGMVLGGRKFKKFNKVRVMR-ALDAVALPQPVGIPNESQR-----  |
| PRGR_SHEEP  | NCPACRLRKCCQAGMVLGGRKFKKFNKVRVMR-TLDAVALPQPVGIPNESQA-----  |
| PRGR_HUMAN  | NCPACRLRKCCQAGMVLGGRKFKKFNKVRVVR-ALDAVALPQPLGVPNESQA-----  |
| NP_990593.1 | NCPACRLRKCCQAGMVLGGRKFKKLNKMKVVR-TLD-VALQQPAVLQDETQSL----- |
|             | * ** :*                                                    |
