# Supplementary material
Source: PubMed Central journal article supplement (PMC1183107)
Supplement: nar_33_14_4455__8.pdf [file nar_33_14_4455__8.pdf]

CLUSTAL W (1.83) multiple sequence alignment

```

7297444      CAICGDRATGKHYGASSCDGCKGFFRRSVR - K - NHQYTCRF - - - - - ARNCVVDKDK - - - -
7297445      CAICGDRATGKHYGASSCDGCKGFFRRSVR - K - NHQYTCRF - - - - - ARNCVVDKDK - - - -
Hs21361185   CAICGDRATGKHYGASSCDGCKGFFRRSVR - K - NHMYSCR - - - - - SRQCVVDKDK - - - -
HsM4504443   CAICGDRATGKHYGASSCDGCKGFFRRSVR - K - NHMYSCR - - - - - SRQCVVDKDK - - - -
Hs6631088    CAICGDRATGKHYGASTCDGCKGFFRRSIR - K - SHIYSCR - - - - - SRQCVVDKDK - - - -
CE14120      CHICNDKSTGKHYGAI - SCDGCKGFFRRSIR - K - RYHYQCRF - - - - - EQNCDVTKNK - - - -
CE16926      CAICGDRATGKHYGAMSCDGCKGFFRRTIR - K - RHSYVCRF - - - - - GEKQVVDKAK - - - -
CE29071      CHICSDVATGRHYGAIACNGCKGFFRRTVR - R - NYEYHCRF - - - - - ESKEIDKHN - - - -
CE01542      CLICGEPSTGKHYGIVACLGCKTFFRRAVV - Q - RQDTECKR - - - - - EKPCDVTTMA - - - -
CE12084      CAVCGDKSTGTHYGVIS - CNGCKGFFRRTVL - R - DQKFTCRF - - - - - NKRCVIDKNF - - - -
CE28943      CAVCGDKSTGTHYGVIS - CNGCKGFFRRTVL - R - DQKFTCRF - - - - - NKRCVIDKNF - - - -
CE21136      CVVCGDKAIGKHYGAVAC - CNGCKGFFRRSVW - Q - NLQYTCRF - - - - - NKQCNIDKDH - - - -
CE17474      CAVCGDGIAKLHYGVLAC - YGCKGFFRRTL - G - KYRYACRF - - - - - SNNCIVDKFQ - - - -
CE28032      CAVCGDTPAKIHYGVLAC - FCGCKGFFRAVKDG - R - NKYVCRF - - - - - EKNCEVTKFE - - - -
CE28062      CKVCGDGNAKTHYGVVTC - FCGCKGFFRRTLK - R - PSEYTCRH - - - - - NGHCVVDRHE - - - -
CE18798      CSVCCDEASGRHYGVVAC - FCGCKGFFRRTVRAG - KN - YVCRY - - - - - SKKCRIDKAG - - - -
CE00815      CLVCSDISTGYHYGVPS - CNGCKTFFRRTIM - K - NQTFSCQF - - - - - QGKCPVDKSI - - - -
CE29114      CLVCQDFASGYHYGVPS - CVGCKTFFRRTIM - K - KQKYICQF - - - - - EGNCVVDKTI - - - -
CE18808      CLVCQDFSSGYHYGIP - SCNGCKTFFRRTVM - K - KQKVCQF - - - - - DQNCVVDKSI - - - -
CE27766      CLVCNDLSSGYHYGVPS - CNGCKTFFRRTIM - K - KQLFVCQH - - - - - EKNCVVDKSI - - - -
CE28757      CAVCSDLATGYHYGVAS - CNGCKTFFRRTIV - S - EQTFICQY - - - - - NGNCDVNKNI - - - -
CE27727      CAVCDDIATGKHYSVAS - CNGCKTFFRRALV - N - NREFVCQG - - - - - NKDCPVNKGV - - - -
CE28413      CAVCDDIATGKHYSVAS - CNGCKTFFRRALV - N - NREFVCQG - - - - - NKDCPVNKGV - - - -
CE28074      CVVCSDFASGIHYSVAS - CNGCKTFFRRALV - N - KQTFVCQF - - - - - SGDCVVGKSV - - - -
CE17465      CSVCGDRPTGYHYDVL - SCNGCKTFFRRTII - N - SRNFICTK - - - - - GGNCQFTKDF - - - -
CE06166      CVVCGDAADGFHYGVR - SCRCGNAAFFRAVT - F - NMSFTCRR - - - - - GGRCPVTKNA - - - -
CE09369      CLVCGDPNIQRHYGT - VSCNGCKGFFRRSIW - E - KRTYKCSF - - - - - NHQCSIEHKY - - - -
CE28893      CLVCGDPHGKRHYGAM - SCNGCKGFFRRSIW - E - KRTYKCSF - - - - - NNECIEEFKY - - - -
CE27764      CRVCGDSRAGRHYGT - IACNGCKGFFRRSIW - E - QRDYVCRF - - - - - GGKCLVVQEY - - - -
CE28894      CLVCGDDKASRHYGT - VACNGCKGFFRRSVW - E - KRTYFCIA - - - - - NEDCEVLQQF - - - -
CE20124      CAVCGDVALGKHYGVN - ACNGCKGFFRRSIW - K - NRTYACRH - - - - - GGKCLVAKEQ - - - -
CE20125      CAVCGDVALGKHYGVN - ACNGCKGFFRRSIW - K - NRTYACRH - - - - - GGKCLVAKEQ - - - -
CE27988      CAVCGDTALGKHYGVT - ACNGCKGFFRRSIW - K - NRTYACRY - - - - - QGKCGVAKEQ - - - -
CE24934      CDVCGDVAFGKHYGIN - ACNGCKGFFRRSVW - S - RRQYSCR - - - - - GGDCPVVKEH - - - -
CE27305      CVVCGDQAFGKHYGVN - ACNGCKGFFRRSVW - H - NRQYLCRF - - - - - EGRCIAAKEH - - - -
CE02111      CSVCGDVASGIHYSVA - ACNGCKTFFRRVVL - E - NRTYSCKN - - - - - NGDCIIDKSM - - - -
Hs4506755    CAICGDRSSGKHYGVYS - CEGCKGFFKRTVRKD - LTYT - CR - - - - - DNKDCLIDKRQ - - - -
Hs5902068    CAICGDRSSGKHYGVYS - CEGCKGFFKRTIRKD - LIYT - CR - - - - - DNKDCLIDKRQ - - - -
Hs11415052   CAICGDRSSGKHYGVYS - CEGCKGFFKRTIRKD - LTYS - CR - - - - - DNKDCTVDKRQ - - - -
7290245      CSICGDRASGKHYGVYS - CEGCKGFFKRTVRKD - LTYA - CR - - - - - ENRNCIIDKRQ - - - -
Hs4507673    CVVCGDKASGRHYGAVT - CEGCKGFFKRSIRKN - LVYS - CR - - - - - GSKDCIINKHH - - - -
Hs4507675    CVVCGDKASGRHYGAVS - CEGCKGFFKRSVRKN - LTYS - CR - - - - - SSQDCIINKHH - - - -
7296444      CLVCGDRASGRHYGAI - SCEGCKGFFKRSIRKQ - LGYQ - CR - - - - - GAMNCEVTKHH - - - -
Hs14149746   CVVCGDKSSGKHYGQFT - CEGCKSFFKRSVRRN - LSYT - CR - - - - - ANRNCPIDQHH - - - -
Hs5032173    CVVCGDKSSGKHYGQFT - CEGCKSFFKRSVRRN - LTYT - CR - - - - - ANRNCPIDQHH - - - -
7299588      CVVCGDKSSGKHYGQFT - CEGCKSFFKRSVRRN - LTYS - CR - - - - - GSRNCPIDQHH - - - -
Hs22052265   CVVCGDKSSGKHYGQFT - CEGCKSFFKRSVRRN - LTYT - CR - - - - - ANRNCPIDQHH - - - -
Hs20070199   CVVCGDKSSGKHYGVFT - CEGCKSFFKRSIRRN - LSYT - CR - - - - - SNRDCQIDQHH - - - -
CE05957      CVVCGDKSSGKHYGQFS - CEGCKSFFKRSIRRS - LSYT - CR - - - - - ATKNC AIDVQH - - - -
7301986      CKVCRDHSSGKHYGIY - ACDGCAGFFKRSIRRS - RQYV - CK - - - - - SQKQGLCVVDKTH - - - -
CE18491      CRVCEDHSSGKHYSIF - SCDGCAGFFKRSIRRH - RQYV - CKNK - GSPSE - GQCKVDKTH - - - -
Hs4507537    CKVCGDRSSGKHYGVY - ACDGCSGFFKRSIRRN - RTYV - CK - - - - - SGNQGGCPVDKTH - - - -
7297033      CKVCGDRSSGKHYGIY - SCDGCSGFFKRSIHRN - RIYT - CKAT - GDLK - GRC - PVDKTH - - - -
Hs7657395    CRVCGDSSSGKHYGIY - A - CNGCSGFFKRSVRRR - LIYR - CQ - - - - - VGAGMCPVDKAH - - - -

```

Hs7706515 CRVCGDSSSGKHYGIYACNGCSGFFKRSVRRR-LIYR-CQ----VGAGMCPVDKAH----  
CE28464 CAVCGDVSSGKHYGILACNGCSGFFKRSVRRR-LIYR-CQ----AGTGNCVVDKAH----  
7303078 CVVCGDTSSGKHYGILACNGCSGFFKRSVRRR-LIYR-CQ----AGTGRCVVDKAH----  
7298928 CAVCGDQSSGKHYGVSCCDGCSCFFKRSVRRG-SSYA-CI----ALVGNVCVVDKAR----  
CE26181 CEICGDKSYGRHYGVWACDGCSCFFKRSVRKN-IIYT-CI----AGNWKCVVDKGR----  
CE16040 CAVCGDTSNGNHYGVPTCFGCSGFFRRTVRNK-LVHG-CW----NGDGNCVIDKAN----  
CE03323 CKVCGDKASGYHYGVTSCEGCKGFFRRSIQRK-IDYR-CL-----KQQVCEIKRES----  
CE24972 CKVCGDKASGYHYGVTSCEGCKGFFRRSIQRK-IDYR-CL-----KQQVCEIKRES----  
7296404 CKVCGDKASGYHYGVTSCEGCKGFFRRSIQKQ-IEYR-CL-----RDGKCLVIRLN----  
7303778 CKVCGDKSSGVHYGVITCEGCKGFFRRSQSSV-VNYQ-CP-----RNKQCVVDRVN----  
CE24775 CKVCGDKSSGVHYGVITCEGCKGFFRRSQSSI-VNYQ-CP-----RQKNCLVDRVN----  
Hs19743901 CKICGDKSSGIHYGVITCEGCKGFFRRSQQSN-ATYS-CP-----RQKNCLIDRTS----  
Hs4506577 CKICGDKSSGIHYGVITCEGCKGFFRRSQQSN-ATYS-CP-----RQKNCLIDRTS----  
Hs19743903 CKICGDKSSGIHYGVITCEGCKGFFRRSQQSN-ATYS-CP-----RQKNCLIDRTS----  
Hs19743905 CKICGDKSSGIHYGVITCEGCKGFFRRSQQSN-ATYS-CP-----RQKNCLIDRTS----  
Hs19743907 CKICGDKSSGIHYGVITCEGCKGFFRRSQQNN-ASYS-CP-----RQRNCLIDRTN----  
Hs19743909 CKICGDKSSGIHYGVITCEGCKGFFRRSQRCN-AAYS-CT-----RQQNCPIDRTS----  
CE26023 CQVCSDKASGFHYGVFACGCKGFFRRSIQOK-ITYRACT-----RAEDCLILRNN----  
Hs13430848 CKVCGDVASGFHYGVHACGCKGFFRRSIQQN-IQYKRCL-----KNENCSIVRIN----  
Hs20336229 CRVCGDKASGFHYGVHACGCKGFFRRRTIRLK-LIYDRCD-----LN--CRIHKKS----  
Hs20336231 CRVCGDKASGFHYGVHACGCKGFFRRRTIRLK-LIYDRCD-----LN--CRIHKKS----  
Hs5453940 CRVCGDKASGFHYGVHACGCKGFFRRRTIRMK-LEYEKCE-----RS--CKIQKKN----  
Hs7549811 CRICGDKASGYHYGVHACGCKGFFRRRTIRLK-LVYDKCD-----RS--CKIQKKN----  
Hs14916494 CFVCGDKSSGYHYGVSAPEGCKGFFRRSIQKN-MIYT-CH-----RDKNCVINKVT----  
Hs4506419 CFVCGDKSSGYHYGVSAPEGCKGFFRRSIQKN-MVYT-CH-----RDKNCIINKVT----  
Hs4506423 CFVCGDKSSGYHYGVSSCEGCKGFFRRSIQKN-MVYT-CH-----RDKNCIINKVT----  
CE08543 CMVCGDNSTGYHYGVQSCGCKGFFRRSVHKN-IAYV-CT-----KGENCTFSYENCAAN  
Hs20070193 CPVCGDKVSGYHYGLLTCESCKGFFKRTVQNN-KHYT-CT-----ESQSKIDKTO----  
Hs4504343 CPVCGDKVSGYHYGLLTCESCKGFFKRTVQNN-KRYT-CI-----ENQNCIDKTO----  
7293866 CPVCGDKVSGYHYGLLTCESCKGFFKRTVQNK-KVYT-CV-----AERSCHIDKTO----  
CE03191 CPVCGDRVSGYHYGLLTCESCKGFFKRTVQNK-KQYQ-CS-----AEANCHVDRTC----  
7298773 CPICGDKISGFHYGIFSCESCKGFFKRTVQNR-KNYV-CV-----RGGPCQVSIST----  
Hs15451846 CLICGDRATGLHYGIIISCEGCKGFFKRSICNK-RVYR-CS-----RDKNCVMSRKQ----  
Hs15451850 CLICGDRATGLHYGIIISCEGCKGFFKRSICNK-RVYR-CS-----RDKNCVMSRKQ----  
Hs15451848 CLICGDRATGLHYGIIISCEGCKGFFKRSICNK-RVYR-CS-----RDKNCVMSRKQ----  
CE27779 CSVCGDKSTGLHYGAATCEGCKGFFKRSVQNK-KVYH-CS-----QDNCCEIDKQN----  
Hs11276071 CAVCGDNAACQHYGVRTCEGCKGFFKRTVQKN-AKYV-CL-----ANKNCPVDKRR----  
Hs5453822 CAVCGDNAACQHYGVRTCEGCKGFFKRTVQKN-AKYV-CL-----ANKNCPVDKRR----  
7298701 CAVCGDTAACQHYGVRTCEGCKGFFKRTVQKG-SKYV-CL-----ADKNCPVDKRR----  
Hs21361342 CAVCGDNASCQHYGVRTCEGCKGFFKRTVQKN-AKYI-CL-----ANKDCPVDKRR----  
HsM4504441 CAVCGDNASCQHYGVRTCEGCKGFFKRTVQKN-AKYI-CL-----ANKDCPVDKRR----  
CE24859 CAVCNDRACLHYGARTCEGCKGFFKRTVQKN-SKYT-CA-----GNKTCPIDKRY----  
Hs22035687 CLVCGDIASGYHYGVASCEACKAFFKRTIQGN-IEYS-CP-----ATNECEITKRR----  
HsM4758308 CLVCGDIASGYHYGVASCEACKAFFKRTIQGN-IEYS-CP-----ATNECEITKRR----  
Hs14741342 CLVCGDIASGYHYGVASCEACKAFFKRTIQGN-IEYS-CP-----ATNECEITKRR----  
Hs18860920 CLVCGDVASGFHYGVASCEACKAFFKRTIQGS-IEYS-CP-----ASNECEITKRR----  
7295148 CLVCGDVASGFHYGVASCEACKAFFKRTIQGN-IEYT-CP-----ANNECEINKRR----  
Hs22049513 CLVCGDIASGYHYGVASCEACKAFFKRTIQGN-IEYS-CP-----ATNECEITKRR----  
Hs10835013 CAVCSDYASGYHYGVWSCEGCKAFFKRSIQGH-NDYI-CP-----ATNQCTIDKNR----  
Hs4503603 CAVCNDYASGYHYGVWSCEGCKAFFKRSIQGH-NDYM-CP-----ATNQCTIDKNR----  
Hs21322252 CLICGDEASGCHYGALTCGSKVFFKRAAEGK-QKYL-CA-----SRNDCTIDKFR----  
HsM4557331 CLICGDEASGCHYGALTCGSKVFFKRAAEGK-QKYL-CA-----SRNDCTIDKFR----  
Hs4504133 CLVCSDEASGCHYGVLTGCGSKVFFKRAVEGQ-HNYL-CA-----GRNDCIIDKIR----  
Hs4505199 CLVCGDEASGCHYGVVTCGSKVFFKRAVEGQ-HNYL-CA-----GRNDCIIDKIR----  
Hs4505767 CLICGDEASGCHYGVLTGCGSKVFFKRAVEGQ-HNYL-CA-----GRNDCIIDKIR----  
7301249 CAVCGDKALGFNFNAVTCECKAFFRRNALA--KKQFTCPFN-----QNCIDITVVT----  
CE18456 CRVCGDKAFSYNFNVITCECKAFFRRNANK--EKEIRCPFN-----EQCEINMVS----

CE20746 CTVCSDRANGYNFGVLTCESECKAFFRRNASK--HKEIKCPFS-----DSCQITSAS-----  
 Hs11863132 CRVCGDKATGYHFNVMTCEGCKGFFRRAMKR--NARLRCPFRK----GACEITRKT-----  
 Hs11863134 CRVCGDKATGYHFNVMTCEGCKGFFRRAMKR--NARLRCPFRK----GACEITRKT-----  
 Hs14702164 CRVCGDKATGYHFNVMTCEGCKGFFRRAMKR--NARLRCPFRK----GACEITRKT-----  
 Hs4507883 CGVCGDRATGFHFNAMTCEGCKGFFRRSMKR--KALFTCPFN-----GDCRITKDN-----  
 Hs4826661 CVVCGDQATGYHFNALTCEGCKGFFRRTVSK--SIGPTCPFA-----GSCEVSKTQ-----  
 Hs10835123 CVVCGDKATGYHYRCITCEGCKGFFRRTIQKNLHPSYSCKYE-----GKCVIDKVT-----  
 Hs20127452 CVVCGDKATGYHYRCITCEGCKGFFRRTIQKNLHPTYSCKYD-----SCCVIDKIT-----  
 7302184 CLVCGDRASGYHYNALTCEGCKGFFRRSVTKS--AVYCCKFG-----RACEMDMYM-----  
 Hs4826980 CVVCGDRASGYHYNALTCEGCKGFFRRSITKN--AVYCKKNG-----GNCVMDMYM-----  
 Hs11321630 CRVCGDKASGFHYNVLSCEGCKGFFRRSVVRRGGARRYACRGG-----GTCQMDAFM-----  
 Hs14786961 CRVCGDKASGFHYNVLSCEGCKGFFRRSVVRRGGARRYACRGG-----GTCQMDAFM-----  
 Hs5031893 CSVCGDKASGFHYNVLSCEGCKGFFRRSVIKG--AHYICHSG-----GHCPCMDTYM-----  
 CE17475 CRVCCDSNGQPHYGTICCPSCCKGFFRRVYMSD--KKFECYR-----GNMCVIQKGT-----  
 CE26822 CSICREPGDGFHFHGAEEACRACAAFFRRSVSQSK--TYLCQGN-----NDCDVTVN-----  
 CE28079 CAICQESAEGFHFHGAEEACRACAAFFRRTVSNRK--TYSQGN-----NDCDVTIN-----  
 CE29473 CSICQESGDGFHFHGAEEACRACAAFFRRSISENK--LYTCSGN-----NDCDVTVN-----  
 CE26532 CSICREDGDGYHFGAEACRACAAFFRRSVSLDK--TYLCRGN-----NDCEITAN-----  
 CE06214 CAVCNEVDGDLHFGAEACRACAAFFRRSVVALSK--KYECRAG-----RNCEVSSN-----  
 CE22324 CSICGEVGNVHFGAEACRACAAFFRRSVALNK--LYRCRGD-----GNCDILST-----  
 CE27061 CSVCGEAGDGAHFGAEACRACAAFFRRSVALNK--AYVCRAM-----GTCVIQKN-----  
 CE27770 CLICCEVADGHHFGAAACRACAAFFRRTVQLNK--VHDCPKN-----GQCFILSN-----  
 CE06213 CAICGDVGDGHHFGLDACRACAAFFRRTVALGK--KFECRQQ-----GACKINTI-----  
 CE17496 CLICGDSADSLHFGALSCRACAAFFRRKVAGRRNIFR--RCD-----RQCKVDTG-----  
 CE24323 CRVCGECADAVHFGALSCRACAAFFRRKVAAGKPLSSSRCS-----GSCKLENQV-----  
 CE16588 CKVCGDTGNMHHFGAFTCRACAAFFRRAASRKFLR-----KCNHLI-----  
 CE17011 CRICFEKGGHYHFGVFSRACAAFFRRCHFLKENRRRCRLS-----KGKCGPNKN-----  
 CE17824 CEVCGDKTSGRHFGVMSCRACAAFFRRAATWNLEKRICPN-----GTCHTSVN-----  
 CE16602 CEKICCEPAHGVHFGVASCRAAAFFRRTTVLGGKYYTCRQKN-----EKCTTNNE-----

\* : \* : : \* . \* \*\* : \*

7297444 ---RNQC-----RYCRLRKCFKAGMKKEAVQNERDRISCRRTSNDDP  
 7297445 ---RNQC-----RYCRLRKCFKAGMKKEAVQNERDRISCRRTSNDDP  
 Hs21361185 ---RNQC-----RYCRLKKCFRAGMKKEAVQNERDRISTRSSYEDS  
 HsM4504443 ---RNQC-----RYCRLKKCFRAGMKKEAVQNERDRISTRSSYEDS  
 Hs6631088 ---RNQC-----RYCRLRKCFRAGMKKEAVQNERDRISTRSTFDGS  
 CE14120 ---RNAC-----RACRLQKCVKAGMKSNAIQNERDAIGKRKKTGAE  
 CE16926 ---RNSC-----RKCRFDVCLRKGMRRAVQTERDRIRPANPLSNGS  
 CE29071 ---RAVC-----RYCRFMKCISSGMRDDQVQSERDVIKREKKNM  
 CE01542 ---RKAC-----RACRYRKCLESGMSKEALQPRDLIGCRRIRSRPS  
 CE12084 ---RCAC-----RYCRFQKCVQVGMKREAIQFERDPVGSPTSASLN  
 CE28943 ---RCAC-----RYCRFQKCVQVGMKREAIQFERDPVGSPTSASLN  
 CE21136 ---RNAC-----RYCRFQKCLADGMKPEAIQNERDRIGSTKRRKRS  
 CE17474 ---RNSC-----RYCRFQRCIQAGMDPKAVRPDRDQTKGQKVPRIK  
 CE28032 ---RNAC-----RYCRFRKCLLVGMNPDYVRPDREKSKGKTVLSK  
 CE28062 ---RNSCRFFSNFLFLKNFLIPKTSRFRFCRFFKCCIEVGMMDPKAVRPDRDATGRHYQ  
 CE18798 ---RNVC-----RSCRFFQKCLEVGMPEPDAIRPDRDKTGRQKNPRRNT  
 CE00815 ---RCAC-----RHCRFEKCLQVGMDRNAIQNRDPIGYTKRTRYP  
 CE29114 ---RCAC-----RYCRFEKCLSVGMDRNLQQRDPIGYTKRTRR  
 CE18808 ---RCAC-----RFCRFEKCLKVGMMDKTSLSQASRDPIGYTKRNRKTL  
 CE27766 ---RCAC-----RFCRFEKCIQVGMMDKSALQASRDPIGYTKRTRKPK  
 CE28757 ---RCAC-----RHCRFNKCLLVGMMDAKAIQNRDRDRIGPTKKIKMSS  
 CE27727 ---RCAC-----RYCRLQKCLAVGMDKNSIQNRDRDRIGYTKRKRHD  
 CE28413 ---RCAC-----RYCRLQKCLAVGMDKN-----CKFLVYFEI-----  
 CE28074 ---RCVC-----RSCRLKKCFDMGMDPKAIQHDKIRYTKALKKKR  
 CE17465 ---RCAC-----RACRFEKCVRVGMNPSAIQFPSSKN--HNEADDMS  
 CE06166 ---RCAC-----RACRLAKCYAVGMDKKAVQPKREVHTSNGSFDQND

CE09369 ---RNRC-----RACRLEKCFRAGMDASAIRNKRAKR - KSQPESPCT  
 CE28893 ---RNRC-----RACRLKRCLHVGMDANAVRSERTRKIKTEIDGDVK  
 CE27764 ---RNRC-----RACRLRKCFVTGMDARAVQSERDKHKKNPKDSNNE  
 CE28894 ---RNRC-----RACRFNKCVVMVGMDARAVQSERE - IRPNETAKKPK  
 CE20124 ---RNAC-----RSCRLTRCLDVGMNPRAVQGDTVEDPEWDEEAMPE  
 CE20125 ---RNAC-----RSCRLTRCLDVGMNPRAVQGDTVEDPEWDEEAMPE  
 CE27988 ---RNAC-----RSCRLKECIKVGMINPRAVQGD - IDTASTSSASPN  
 CE24934 ---RNVC-----RSCRLKKCFEVMNPDVSVQNER - DRNAKNGGMGGP  
 CE27305 ---RNVC-----RACRLKQCFVAGMINPRAVQSER - VEREQNGSPN - Q  
 CE02111 ---RCSC-----RHCRYKKCI IAGMDRGELSMERRRKRKLNGLGELS  
 Hs4506755 ---RNRCQ-----YCRYQKCLAMGMKREAVQEERQGRKDRNENEVES  
 Hs5902068 ---RNRCQ-----YCRYQKCLVMGMKREAVQEERQGRSREAESEAE  
 Hs11415052 ---RNRCQ-----YCRYQKCLATGMKREAVQEERQGRKDK - DGDGEG  
 7290245 ---RNRCQ-----YCRYQKCLTCGMKREAVQEERQGRARNAAGRLSA  
 Hs4507673 ---RNRCQ-----YCRQLQRCIAFGMKQDSVQCERKPIEVSREKSSNC  
 Hs4507675 ---RNRCQ-----FCRLKKCLEMGMKMSVQSERKPFVQREKPSNC  
 7296444 ---RNRCQ-----FCRLQKCLASGMR - TVQHERKPIVDRKEGIIAA  
 Hs14149746 ---RNQCQ-----YCRLLKCLKVGMRREAVQGRMPPTQP - - - THG  
 Hs5032173 ---RNQCQ-----YCRLLKCLKVGMRREAVQGRMPPTQP - - - NPG  
 7299588 ---RNQCQ-----YCRLLKCLKMGMRREAVQGRVPPTQPGLAGMHG  
 Hs22052265 ---RNQCQ-----YCRLLKCLKRFSEEECLQ - - - P - - SP - - - IQA  
 Hs20070199 ---RNQCQ-----YCRLLKCFRVGMRKEAVQGRGRI PHSLP - - - - G  
 CE05957 ---RNQCQ-----YCRLLTKCIRMGMRKEGRRSNETQTAVSAVQRGRL  
 7301986 ---RNQCR-----ACRLRKCFEVMNPKDAVQHERGPRNSTLRR - - - H  
 CE18491 ---RNQCR-----ACRLRKCLEIGMNKDAVQHERGPRNSSLRR - - - Q  
 Hs4507537 ---RNQCR-----ACRLKKCLEVNMMNDAVQHERGPRSTIRK - - - Q  
 7297033 ---RNQCR-----ACRLAKCFQSAMNKDAVQHERGPRKPKLHP - - - Q  
 Hs7657395 ---RNQCQ-----ACRLKKCLQAGMNQDAVQNERQPRSTAQVH - - LD  
 Hs7706515 ---RNQCQ-----ACRLKKCLQAGMNQDAVQNERQPRSTAQVH - - LD  
 CE28464 ---RNQCQ-----ACRLKKCLNKGMINKDAVQNERQPRSTATIRPALD  
 7303078 ---RNQCQ-----ACRLKKCLQMGMINKDDDSIDVTNDNEEPPHA - - VS  
 7298928 ---RNWCP-----SCRFRQCLAVGMNAAAVQEERGPRNQVALY - - R  
 CE26181 ---RNWCP-----ACRLAKCTRLKMNRLGPAFFSSTHGEKAKIWI - - G  
 CE16040 ---RNRCK-----SCRICKCFKKGMKNNAVQPERSHYSYTVVEY - - VE  
 CE03323 ---RNRCQ-----YCRFKKCLDSGMSKDSVRQMKFRNAMR - - DDKSP  
 CE24972 ---RNRCQ-----YCRFKKCLDSGMSKDSVRQMKFRNAMR - - DDKSP  
 7296404 ---RNRCQ-----YCRFKKCLDSGMSRDSVRYGRVPPKRSRELNGAAA  
 7303778 ---RNRCQ-----YCRLLQKCLKLGMSRDAVKFGRMSKKQREKVEDEV  
 CE24775 ---RNRCQ-----YCRLLKCCIELGMSRDAVKFGRMSKKQREKVEDEV  
 Hs19743901 ---RNRCQ-----HCRLQKCLAVGMSRDAVKFGRMSKKQRDSLAEV  
 Hs4506577 ---RNRCQ-----HCRLQKCLAVGMSRDAVKFGRMSKKQRDSLAEV  
 Hs19743903 ---RNRCQ-----HCRLQKCLAVGMSRDAVKFGRMSKKQRDSLAEV  
 Hs19743905 ---RNRCQ-----HCRLQKCLAVGMSRDAVKFGRMSKKQRDSLAEV  
 Hs19743907 ---RNRCQ-----HCRLQKCLALGMSRDAVKFGRMSKKQRDSLAEV  
 Hs19743909 ---RNRCQ-----HCRLQKCLALGMSRDAVKFGRMSKKQRDSLAEV  
 CE26023 ---RNRCQ-----CCRLKKCLAVGMSRDAVRFGRVPPKREKARMFEEEM  
 Hs13430848 ---RNRCQ-----QCRFKKCLSVGMSRDAVRFGRVPPKREKARMLAEM  
 Hs20336229 ---RNKCQ-----YCRFQKCLAVGMSHNAIRFGRMPQAEKEKLLAEI  
 Hs20336231 ---RNKCQ-----YCRFQKCLAVGMSHNAIRFGRMPQAEKEKLLAEI  
 Hs5453940 ---RNKCQ-----YCRFQKCLALGMSHNAIRFGRMPQAEKRKLVAAGL  
 Hs7549811 ---RNKCQ-----YCRFHKCLSVGMSHNAIRFGRMPRSEKAKLKAIEI  
 Hs14916494 ---RNRCQ-----YCRLLQKCFEVMGMSKESVRNDRNKKKKKETSQKQECT  
 Hs4506419 ---RNRCQ-----YCRLLQKCFEVMGMSKESVRNDRNKKKKKKEVPKPECS  
 Hs4506423 ---RNRCQ-----YCRLLQKCFEVMGMSKEAVRNDNRNKKKKKKEEGSP  
 CE08543 RGVVTRCQ-----ACRFAKCLAVGMNDRNVRVNKETDKDVKPSVASP  
 Hs20070193 ---RKRCP-----FCRFQKCLTVGMRLEAVRADRMGRGRN - - KFGPM  
 Hs4504343 ---RKRCP-----YCRFQKCLSVGMKLEAVRADRMGRGRN - - KFGPM

7293866 ---RKRCP-----YCRFQKCLEVGMKLEAVRADRMGRGRN--KFGPM  
CE03191 ---RKRCP-----SCRFFQKCLTMGMKMEAVRADRMGRGRN--KFGSF  
7298773 ---RKKCP-----ACRFEKCLQKGMKLEAIREDRTRGGRS--TYQCS  
Hs15451846 ---RNRCQ-----YCRLLKCLQMGMMNRKAIREDGMPGGRN--KSIGPV  
Hs15451850 ---RNRCQ-----YCRLLKCLQMGMMNRKAIREDGMPGGRN--KSIGPV  
Hs15451848 ---RNRCQ-----YCRLLKCLQMGMMNRKTIREDGMPGGRN--KSIGPV  
CE27779 ---RNRCQ-----SCRFRKCI SKGMLTEAVREDRMPGGRNNGNSIYSN  
Hs11276071 ---RNRCQ-----YCRFQKCLSVGMVKEVVRTDSLKGRRG--RLPSK  
Hs5453822 ---RNRCQ-----YCRFQKCLAVGMVKEVVRTDSLKGRRG--RLPSK  
7298701 ---RNRCQ-----FCRFQKCLVVGVMVKEVVRTDSLKGRRG--RLPSK  
Hs21361342 ---RNRCQ-----FCRFQKCLAVGMVKEVVRTDSLKGRRG--RLPSK  
HsM4504441 ---RNRCQ-----YCRFQKCLAVGMVKEVVRTDSLKGRRG--RLPSK  
CE24859 ---RSRCQ-----YCRYQKCLEVGMVKEIVRHGSLSGRRG--RLSSK  
Hs22035687 ---RKSCQ-----ACRFMKCLKVGMLKEGVRLDRVRGGRQ--KYKRR  
HsM4758308 ---RKSCQ-----ACRFMKCLKVGMLKEGVRLDRVRGGRQ--KYKRR  
Hs14741342 ---RKSCQ-----ACRFMKCLKVGMLKEGVRLDRVRGGRQ--KYKRR  
Hs18860920 ---RKACQ-----ACRFTKCLR VGMLKEGVRLDRVRGGRQ--KYKRR  
7295148 ---RKACQ-----ACRFQKCLLMGMLKEGVRLDRVRGGRQ--KYRRN  
Hs22049513 ---RKSCQ-----ACRFMKCLKVGMLKEELCCLIWQPPAT--RGSRV  
Hs10835013 ---RKSCQ-----ACRLRKCYEVGMVKCGSRRERCGYRLV--RRQRS  
Hs4503603 ---RKSCQ-----ACRLRKCYEVGMMKGGIRKDRRGGRML--KHKRQ  
Hs21322252 ---RKNCQ-----SCRLRKCYEAGMTLGARKLKKLGNLKL--QEEGE  
HsM4557331 ---RKNCQ-----SCRLRKCYEAGMTLGARKLKKLGNLKL--QEEGE  
Hs4504133 ---RKNCQ-----ACRYRKCLQAGMNLEARKTKK--KIKG--IQQAT  
Hs4505199 ---RKNCQ-----ACRLQKCLQAGMNLGARKSKKLKGLK--IHEEQ  
Hs4505767 ---RKNCQ-----ACRLRKCCQAGMVLGGRKFKKFNKVRV--VR-AL  
7301249 ---RRFCQ-----KCRLRKCLDIGMKS ENIMSEEDKL--IKRRIETN  
CE18456 ---RRFCQ-----RCRLTKCFAVSLAEKSHRLEELFVGMKKEWIMSE  
CE20746 ---RKFCQ-----ACRLNKCFAVGMNSEWLNLDLKPSSIVSGKFKRK  
Hs11863132 ---RRQCQ-----ACRLRKCLESGMKKEMIMSDEAVE--ERRALIKRK  
Hs11863134 ---RRQCQ-----ACRLRKCLESGMKKEMIMSDEAVE--ERRALIKRK  
Hs14702164 ---RRQCQ-----ACRLRKCLESGMKKEMIMSDEAVE--ERRALIKRK  
Hs4507883 ---RRHCQ-----ACRLKRCVDIGMMKEFILTDEEVQ--RKREMILKR  
Hs4826661 ---RRHCP-----ACRLQKCLDAGMRKDMILSAEALA--LRRAKQAQR  
Hs10835123 ---RNQCQ-----ECRFKKCIYVGMATDLVLDLDDSKRL--AKRKLIEEN  
Hs20127452 ---RNQCQ-----LCRFKKCIAVGMAMDLVLDLDDSKRV--AKRKLIEQN  
7302184 ---RRKCQ-----ECRLKKCLAVGMRPECVV PENQCAMKRREKKAQK  
Hs4826980 ---RRKCQ-----ECRLRKCKEMGMLAECLL TEIQCKSKRLRKNVKQ  
Hs11321630 ---RRKCQ-----QCRLRKCKEAGMREQCVLSEEQIRKKKIRKQQQQ  
Hs14786961 ---RRKCQ-----QCRLRKCKEAGMREQCVLSEEQIRKKKIRKQQQ--  
Hs5031893 ---RRKCQ-----ECRLRKCRQAGMREECVLSEEQIRLKKLKRQEEE  
CE17475 ---RNICR-----ACRYKKCLQVGMNVKGSTTRHNLRLINIYVQTSAE  
CE26822 ---IRCMCR-----ACRYVKCIEVGMNPPVGVQQKP--RLPKNRKEVSID  
CE28079 ---IRCMCR-----ACRYIKCIEVGMNPPAGVQQR--PPSKTLVEVSMD  
CE29473 ---IRCMCR-----ACRLTKCIEVGMNPPVGVVQKPGSFRKSKELISPS  
CE26532 ---IRCMCR-----SCRFAKCLEVGMNPPAGVQQRRTIGK--REIKPD  
CE06214 ---IRCMCR-----SCRYDKCIEVGMNPECVQNR--ENDTPKADLQFD  
CE22324 ---IRCMCR-----ACRFKCMVAVGMKREAVQKYRDAYGK--RGSDVE  
CE27061 ---VRCMCR-----ACRFTKCIAVGMRKSAVQRHRELFAS--QETSSE  
CE27770 ---VRNMCR-----ACRYEKCLEVGMQRS SVQQRDQLGR--RDGLP  
CE06213 ---IRSICK-----SCRLNKCLNLGMKRS CVQPRRDQPQKEEKLILPS  
CE17496 ---MRKLCA-----SCRYDKCLKVGMRSAVLSRLAKKNQNYKKSIVG  
CE24323 ---LRLCA-----KCRYEKCVQVGMRTSAVLSRLAVKSEPEFESLLD  
CE16588 ---FALKCK-----NCRLQRCYEAGMSEN FQFCRDLIGAKGAI PKLK  
CE17011 ---GKWFCK-----TCRLERC FRLGMTPSNIQYDRDAY--KSSVKKIK  
CE17824 ---GKFNCK-----QCRLKKCLDVGM DTRSESKVQCLKITIRLISGFQ  
CE16602 ---DRFNCR-----YCRYQKCLSNGMTPESTDV KYNYDAAVHYNKKPS

\*

\*\* \*

7297444 DPGNGLSVISLVKA-----  
7297445 DPGNGLSVISLVKA-----  
Hs21361185 ---SLPSINALLQAEVL-----  
HsM4504443 ---SLPSINALLQAEVL-----  
Hs6631088 ---NIPSINTLAQAEVR-----  
CE14120 ---KEDLIDQLVAAETL-----  
CE16926 ---NGGIVPDDPLLDLTL-----  
CE29071 TYCQDPTPRTSPEL-----  
CE01542 ---CSTSTPTPPRPQVE-----  
CE12084 --GTPFKKDRSPGYEN-----  
CE28943 --GTPFKKDRSPGYEN-----  
CE21136 --ANSENNSDSEGTPS-----  
CE17474 K-QIDEELLNHMMRL-----  
CE28032 K-SVSRSLSYRLAD-----  
CE28062 -----  
CE18798 EGSIKKVSVGSILG-----  
CE00815 PIKKVEASDECSPA-----  
CE29114 PKKELKTTSDCSSDEG-----  
CE18808 RHPMNELSGDESNS-----  
CE27766 TKDVSFSSSEMSP-----  
CE28757 GSDDEQATTPHRLQ-----  
CE27727 DNDMEGGVHHSEHI-----  
CE28413 ---MEGS-----  
CE28074 EEEKREEMHTMLID-----  
CE17465 GDEDSNIQDDKSLAL-----  
CE06166 PDYDLRLGGTRTSP-----  
CE09369 EEIENRALSWQTEAI-----  
CE28893 LEIKEEPPADSEAD-----  
CE27764 GSTSPQYPTASTPI-----  
CE28894 GSLKGRSSLQTSNS-----  
CE20124 TLSISTQTDALKVK-----  
CE20125 TLSISTQTDALKVK-----  
CE27988 LVSVEMHPYTKEVECO-----  
CE24934 MSSPTQSSLCKELTI-----  
CE27305 IEEDDYKDLSSPDTCS-----  
CE02111 EESWETEDALINLL-----  
Hs4506755 TSSANEDMP-VERIL-----  
Hs5902068 ATSGHEDMP-VERIL-----  
Hs11415052 AGGAPEEMP-VDRILE-----  
7290245 SGGGSSGPGSVGGS-----  
Hs4507673 AASTEKIYIRKDLR-----  
Hs4507675 AASTEKIYIRKDLR-----  
7296444 AGSSSTSGGGNGSSTY-----  
Hs14149746 QFALTNGDPLNCHSYLSG-----  
Hs5032173 QYALTNGDPLNGHCYLSG-----  
7299588 QYQIANGDPMG----IAG-----  
Hs22052265 STHSPTGTSPNGHCYLSGYISLLL  
Hs20070199 AVAASSGSPPG--SALAAVASG--  
CE05957 PVTMPSLFPPN--MFL-----  
7301986 MAMYKDAMMGAGEMP-----  
CE18491 QMMFDHGSSPNS-----  
Hs4507537 VALYFRGHKEENGAA-----  
7297033 LHHHHHHAAAAAA-----  
Hs7657395 SMESNTESRPESLVA-----  
Hs7706515 SMESNTESRPESLVA-----

|            |                          |
|------------|--------------------------|
| CE28464    | -MDPQNFFR-EYAGA-----     |
| 7303078    | RSDSS-FIMPQFMSPN-----    |
| 7298928    | TGRRQAPPSQAAPSP-----     |
| CE26181    | PTNIRPPTSYPFRAP-----     |
| CE16040    | LPSFREYSKGLLPTH-----     |
| CE03323    | DSVVFVPEISTLERQEE-----   |
| CE24972    | DSVVFVPEISTLERQEE-----   |
| 7296404    | SSAAAGAPASLNVD-----      |
| 7303778    | RFHRAQMRAQSDAA-----      |
| CE24775    | RMHKELAANGLGYQ-----      |
| Hs19743901 | QKHRMQQQQORDHQQ-----     |
| Hs4506577  | QKHRMQQQQORDHQQ-----     |
| Hs19743903 | QKHRMQQQQORDHQQ-----     |
| Hs19743905 | QKHRMQQQQORDHQQ-----     |
| Hs19743907 | QKHQQLQEQRQQQ-----       |
| Hs19743909 | QKQLQQRQQQQQEP-----      |
| CE26023    | QKTNVQSQRDQIA-----       |
| Hs13430848 | QSAMNLAN-NQLSS-----      |
| Hs20336229 | SS-DIDQLNPESADLR-----    |
| Hs20336231 | SS-DIDQLNPESADLR-----    |
| Hs5453940  | TANEGSQYNPQVADL-----     |
| Hs7549811  | LTCEHDIEDSETADL-----     |
| Hs14916494 | ESYEMTAELDDLTE-----      |
| Hs4506419  | ESYTLTPEVGELIE-----      |
| Hs4506423  | DSYELSPQLEELIT-----      |
| CE08543    | NFEMTSQ-----             |
| Hs20070193 | YKRD--RALKQOKKAQIR-----  |
| Hs4504343  | YKRD--RALKQOKKALIR-----  |
| 7293866    | YKRD--RARKLQVMRQRQ-----  |
| CE03191    | YKKD--RAHRMQRNAMRV-----  |
| 7298773    | YTLP--NSMLSPLLSPDQ-----  |
| Hs15451846 | QISE--EEIERIMSGQE-----   |
| Hs15451850 | QISE--EEIERIMSGQE-----   |
| Hs15451848 | QISE--EEIERIMSGQE-----   |
| CE27779    | YKQR--RSIIRKTKDY-----    |
| Hs11276071 | PKSPLQQEPSQPSPPS-----    |
| Hs5453822  | PKSP--QEPSPPSPVSL-----   |
| 7298701    | PKSP---QESPPSPPISLI----- |
| Hs21361342 | PKQP--PDASPANLLTSL-----  |
| HsM4504441 | PKQP--PDASPANLLTSL-----  |
| CE24859    | TKLA--RSEDQPSPLPL-----   |
| Hs22035687 | LDSESSPYLSLQISPP-----    |
| HsM4758308 | LDSENSPYLSLQISPP-----    |
| Hs14741342 | IDAENSPYLNPLVQP-----     |
| Hs18860920 | PEVDPLPFPFPFPAGP-----    |
| 7295148    | PVSNSYQTMQLLYQSN-----    |
| Hs22049513 | LVQTEVC-----             |
| Hs10835013 | ADEQLHCAGKAKRSGG-----    |
| Hs4503603  | RDDG-EGRGEVGSAGDM-----   |
| Hs21322252 | AS-STTSPTEETTQKLT-----   |
| HsM4557331 | AS-STTSPTEETTQKLT-----   |
| Hs4504133  | TGVSQETSENPKNKTIVP-----  |
| Hs4505199  | P--QQQQPPPPPPPPQSP-----  |
| Hs4505767  | DAVALPQPVGVPNESQA-----   |
| 7301249    | RAKRRLMENGTDACD-----     |
| CE18456    | EARLEKKQERVEENR-----     |
| CE20746    | KPDMKNNLKVEVDD-----      |

|            |                          |
|------------|--------------------------|
| Hs11863132 | KSERTGTQPLGVQG-----      |
| Hs11863134 | KSERTGTQPLGVQG-----      |
| Hs14702164 | KSERTGTQPLGVQG-----      |
| Hs4507883  | KEEEALKDSLRPKLS-----     |
| Hs4826661  | RAQQTPVQLSKEQEE-----     |
| Hs10835123 | REKRRREELQKSI-----       |
| Hs20127452 | RERRRKEEMIRSL-----       |
| 7302184    | EKDKMTTSPSSQHG-----      |
| Hs4826980  | HADQTVNEDSEGRD-----      |
| Hs11321630 | ESQSQSQSPVGP-----        |
| Hs14786961 | ESQSQSQSPVGPQ-----       |
| Hs5031893  | QAHATSLPPRRSSP-----      |
| CE17475    | KRQTKRRMITQKGT-----      |
| CE26822    | LLSSPRTSNSLMLEL-----     |
| CE28079    | L---PTVSNPSILSFSP-----   |
| CE29473    | SSNHDEFSRMPILS-----      |
| CE26532    | STDLMQLLGSVGDGYP-----    |
| CE06214    | TSKTEIRRPPIPWFNI-----    |
| CE22324    | SPGSSSVS--LPNQDGF-----   |
| CE27061    | SSSNPRISPTLSWPMD-----    |
| CE27770    | TNREEPVLDTMRRAYEK-----   |
| CE06213    | MNVSPADIEVSCIE-----      |
| CE17496    | SPD-AYEPSTSTSDS-----     |
| CE24323    | QIKLAYERLQMA-----        |
| CE16588    | VPKSFEQTVGRPYFVLQCDP---- |
| CE17011    | DSAENITEPKRDAT-----      |
| CE17824    | TDRDLISCSAISQS-----      |
| CE16602    | PKMKIDAHEPPSD-----       |
