# Supplementary material
Source: PubMed Central journal article supplement (PMC1183107)
Supplement: nar_33_14_4455__9.pdf [file nar_33_14_4455__9.pdf]

| BZIP# | GCN4_YEAST# | NR#  | GCR_RAT# |
|-------|-------------|------|----------|
| -22   | 231         | D001 | 440      |
| -21   | 232         | D002 | 441      |
| -20   | 233         | D003 | 442      |
| -19   | 234         | D004 | 443      |
| -18   | 235         | D005 | 444      |
| -17   | 236         | D006 | 445      |
| -16   | 237         | D007 | 446      |
| -15   | 238         | D008 | 447      |
| -14   | 239         | D009 | 448      |
| -13   | 240         | D010 | 449      |
| -12   | 241         | D011 | 450      |
| -11   | 242         | D012 | 451      |
| -10   | 243         | D013 | 452      |
| -9    | 244         | D014 | 453      |
| -8    | 245         | D015 | 454      |
| -7    | 246         | D016 | 455      |
| -6    | 247         | D017 | 456      |
| -5    | 248         | D018 | 457      |
| -4    | 249         | D019 | 458      |
| -3    | 250         | D020 | 459      |
| -2    | 251         | D021 | 460      |
| -1    | 252         | D022 | 461      |
| 1     | 253         | D023 | 462      |
| 2     | 254         | D024 | 463      |
| 3     | 255         | D025 | 464      |
| 4     | 256         | D026 | 465      |
| 5     | 257         | D027 | 466      |
| 6     | 258         | D028 | 467      |
| 7     | 259         | D029 | 468      |
| 8     | 260         | D030 | 469      |
| 9     | 261         | D031 | 470      |
| 10    | 262         | D032 | 471      |
| 11    | 263         | D033 | 472      |
| 12    | 264         | D034 | 473      |
| 13    | 265         | D035 | 474      |
| 14    | 266         | D036 | 475      |
| 15    | 267         | D037 | 476      |
| 16    | 268         | D038 | 477      |
| 17    | 269         | D039 | 478      |
| 18    | 270         | D040 | 479      |
| 19    | 271         | D041 | 480      |
| 20    | 272         | D042 | 481      |
| 21    | 273         | D043 | 482      |
| 22    | 274         | D044 | 483      |
| 23    | 275         | D045 | 484      |
| 24    | 276         | D046 | 485      |
|       |             | D047 | 486      |
|       |             | D048 | 487      |
|       |             | D049 | 488      |
|       |             | D050 | 489      |
|       |             | D051 | 490      |
|       |             | D052 | 491      |
|       |             | D053 | 492      |
|       |             | D054 | 493      |
|       |             | D055 | 494      |
|       |             | D056 | 495      |

|      |     |
|------|-----|
| D057 | 496 |
| D058 | 497 |
| D059 | 498 |
| D060 | 499 |
| D061 | 500 |
| D062 | 501 |
| D063 | 502 |
| D064 | 503 |
| D065 | 504 |
|      | 505 |
|      | 506 |
|      | 507 |
|      | 508 |
|      | 509 |
|      | 510 |
|      | 511 |
|      | 512 |
|      | 513 |
|      | 514 |
|      | 515 |
|      | 516 |
|      | 517 |
|      | 518 |
|      | 519 |
|      | 520 |
|      | 521 |
|      | 522 |
|      | 523 |
|      | 524 |
|      | 525 |
|      | 526 |
|      | 527 |
|      | 528 |
|      | 529 |
|      | 530 |
|      | 531 |
|      | 532 |
|      | 533 |
|      | 534 |
|      | 535 |
|      | 536 |
|      | 537 |
|      | 538 |
|      | 539 |
|      | 540 |
|      | 541 |
