# Supplementary material
Source: PubMed Central journal article supplement (PMC1183107)
Supplement: nar_33_14_4455__10.pdf [file nar_33_14_4455__10.pdf]

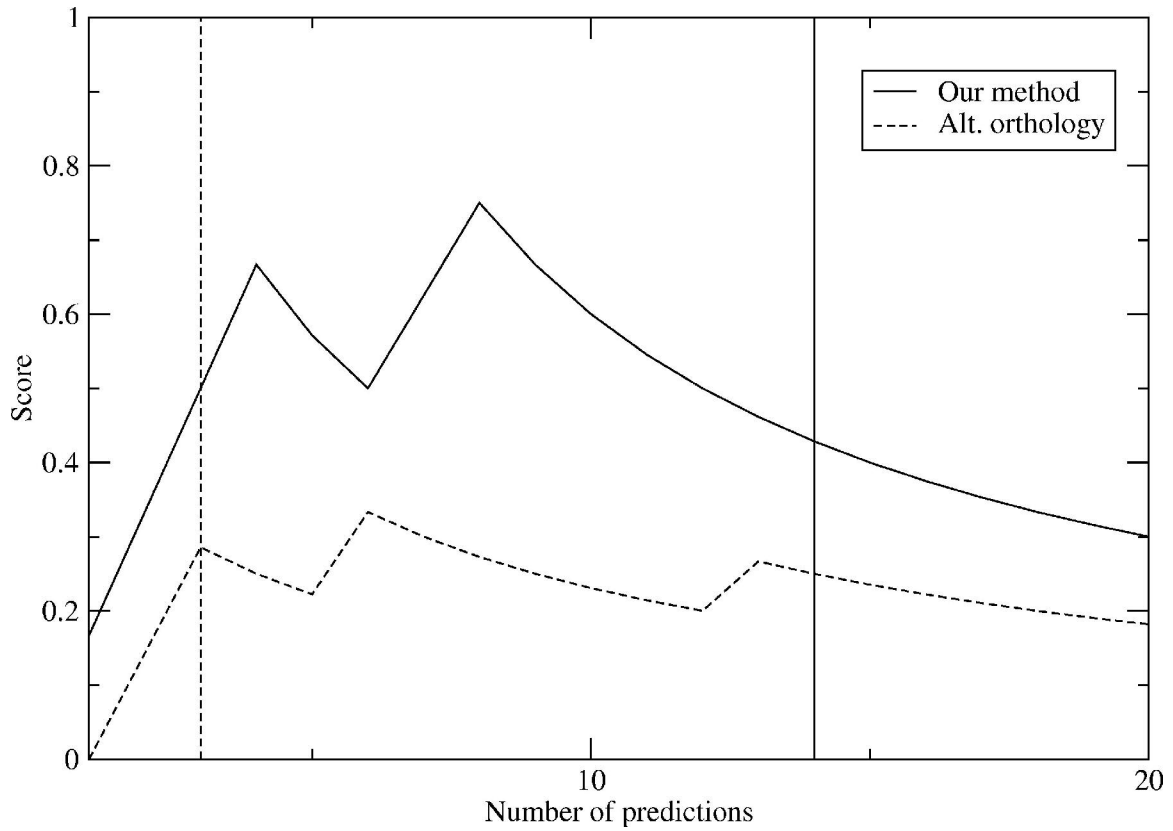

**Supplementary Figure 1.** Plot of score versus the number of predictions considered for our method and the alternative orthology method. The vertical lines represent the number of the last prediction with a z-score above 3.0.

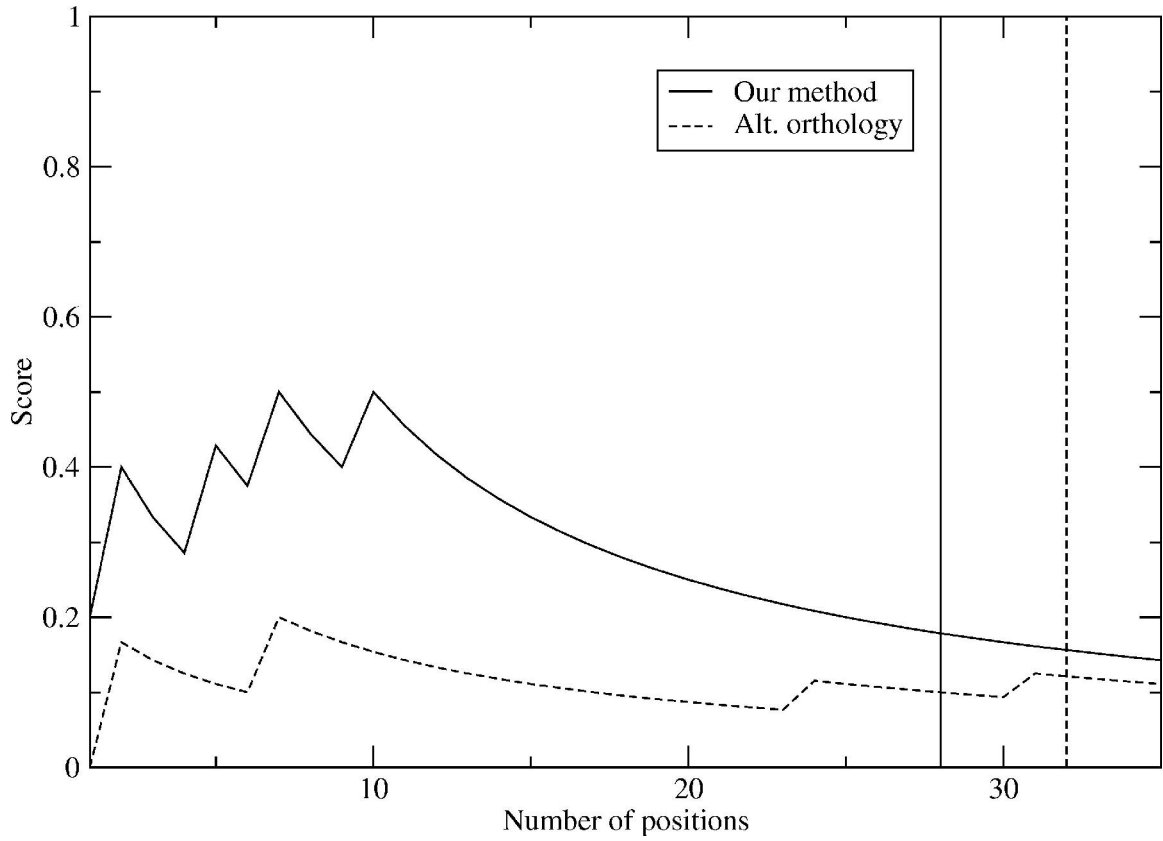

**Supplementary Figure 2.** Plot of score versus the number of predictions considered for our method and the alternative orthology method. The vertical lines represent the number of the last prediction with a z-score above 3.0.

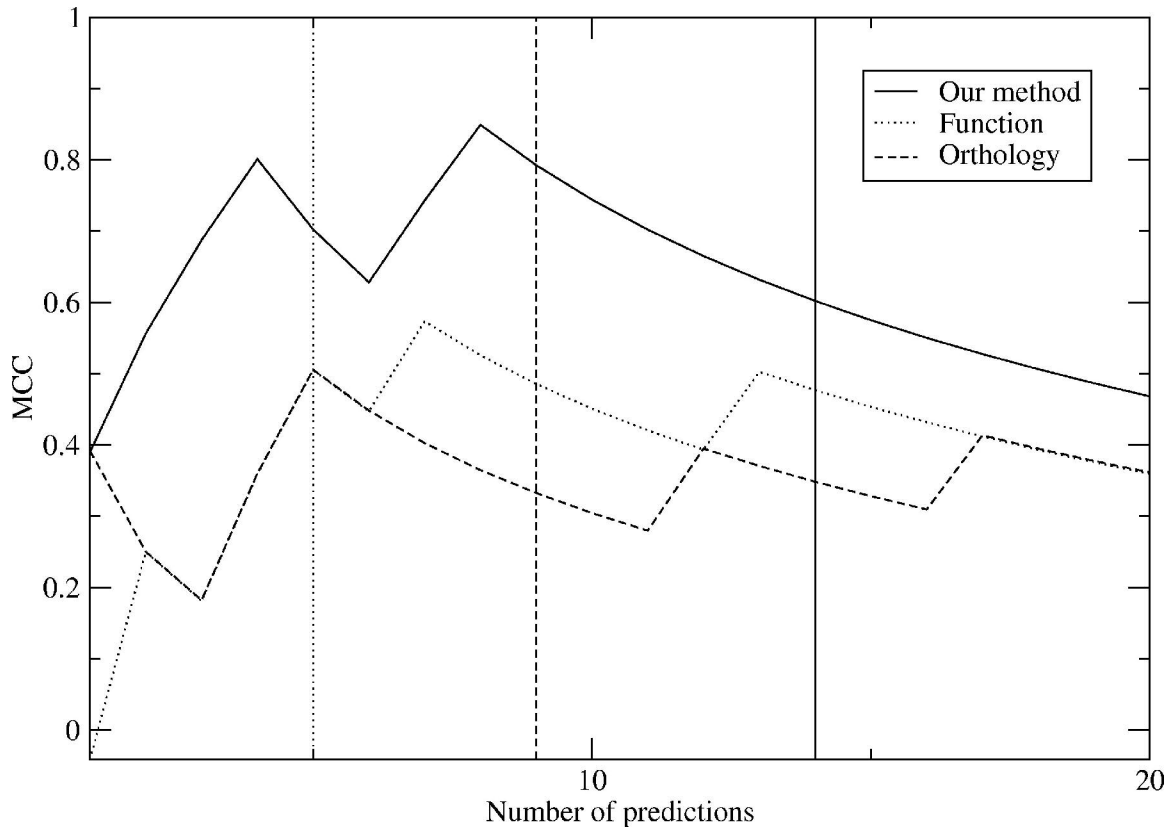

**Supplementary Figure 3.** Plot of Matthew's correlation coefficient for basic leucine zipper DNA base specificity-determining residues versus the number of predictions considered. The vertical lines represent the number of the last prediction with a z-score above 3.0.

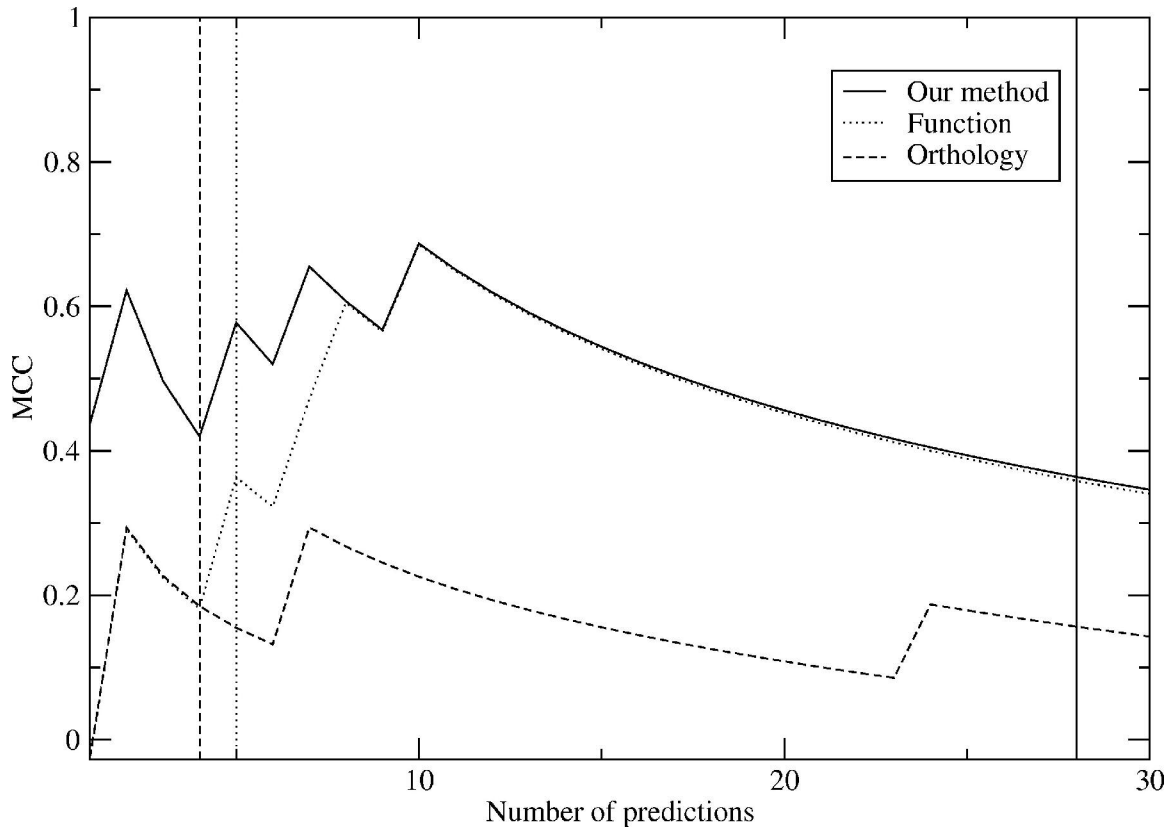

**Supplementary Figure 4.** Plot of Matthew's correlation coefficient for nuclear receptor DNA base specificity-determining residues versus the number of predictions considered. The vertical lines represent the number of the last prediction with a z-score above 3.0.
